# Supplementary material
Source: publisher figshare collection journal article supplement (https://tandf.figshare.com/articles/dataset/_/20332150)
Supplement: Supplementary file 1 [file 1]

| Table S1. Significantly enriched GO terms and KEGG pathways of candidate genes | | | | | | | |
| --- | --- | --- | --- | --- | --- | --- | --- |
| Category | Term | Description | Gene Ratio | Background Ratio | P-value | Padj-value | Q-value |
| GO-BP | GO:0001819 | positive regulation of cytokine production | 39/130 | 464/18670 | 1.60e-31 | 5.96e-28 | 2.99e-28 |
| GO-BP | GO:0032496 | response to lipopolysaccharide | 34/130 | 330/18670 | 2.26e-30 | 4.21e-27 | 2.12e-27 |
| GO-BP | GO:0002237 | response to molecule of bacterial origin | 34/130 | 343/18670 | 8.42e-30 | 1.05e-26 | 5.27e-27 |
| GO-BP | GO:0071216 | cellular response to biotic stimulus | 29/130 | 236/18670 | 3.95e-28 | 3.69e-25 | 1.86e-25 |
| GO-BP | GO:0071219 | cellular response to molecule of bacterial origin | 27/130 | 212/18670 | 1.24e-26 | 9.28e-24 | 4.66e-24 |
| GO-CC | GO:0061702 | inflammasome complex | 9/128 | 14/19717 | 3.00e-17 | 8.48e-15 | 6.91e-15 |
| GO-CC | GO:0045121 | membrane raft | 14/128 | 315/19717 | 1.79e-08 | 1.76e-06 | 1.43e-06 |
| GO-CC | GO:0098857 | membrane microdomain | 14/128 | 316/19717 | 1.87e-08 | 1.76e-06 | 1.43e-06 |
| GO-CC | GO:0098589 | membrane region | 14/128 | 328/19717 | 2.98e-08 | 2.11e-06 | 1.72e-06 |
| GO-CC | GO:0044445 | cytosolic part | 12/128 | 247/19717 | 7.52e-08 | 4.26e-06 | 3.47e-06 |
| GO-MF | GO:0097153 | cysteine-type endopeptidase activity involved in apoptotic process | 9/126 | 15/17697 | 1.70e-16 | 6.74e-14 | 4.74e-14 |
| GO-MF | GO:0044389 | ubiquitin-like protein ligase binding | 16/126 | 308/17697 | 6.12e-10 | 8.47e-08 | 5.95e-08 |
| GO-MF | GO:0004197 | cysteine-type endopeptidase activity | 11/126 | 116/17697 | 6.40e-10 | 8.47e-08 | 5.95e-08 |
| GO-MF | GO:0005126 | cytokine receptor binding | 15/126 | 286/17697 | 1.92e-09 | 1.84e-07 | 1.29e-07 |
| GO-MF | GO:0031625 | ubiquitin protein ligase binding | 15/126 | 290/17697 | 2.32e-09 | 1.84e-07 | 1.29e-07 |
| KEGG | hsa04621 | NOD-like receptor signaling pathway | 35/108 | 181/8076 | 4.59e-32 | 8.85e-30 | 4.06e-30 |
| KEGG | hsa05132 | Salmonella infection | 31/108 | 249/8076 | 3.09e-22 | 2.98e-20 | 1.37e-20 |
| KEGG | hsa05131 | Shigellosis | 30/108 | 246/8076 | 3.05e-21 | 1.96e-19 | 8.99e-20 |
| KEGG | hsa04210 | Apoptosis | 22/108 | 136/8076 | 2.44e-18 | 1.18e-16 | 5.40e-17 |
| KEGG | hsa05134 | Legionellosis | 15/108 | 57/8076 | 3.99e-16 | 1.54e-14 | 7.06e-15 |
| Abbreviations: GO, Gene Ontology; KEGG, Kyoto Encyclopedia of Genes and Genomes; BP, biological process; CC, cellular component; MF, molecular function. | | | | | | | |

| Table S2. Univariate and Multivariate COX regression for clinical characteristics and cell death-related hub genes expression in various tumors | | | | | | | |
| --- | --- | --- | --- | --- | --- | --- | --- |
| Types | Characteristics | Variables | Total(N) | Univariate analysis | | Multivariate analysis | |
| Hazard ratio (95% CI) | P-value | Hazard ratio (95% CI) | P-value |
| SKCM | Pathologic stages | T3+T4/T1+T2 | 361 | 2.085 (1.501-2.895) | **<0.001** | 1.735 (1.212-2.484) | **0.003** |
| N1+N2+N3/N0 | 402 | 1.752 (1.304-2.354) | **<0.001** | 2.163 (1.538-3.043) | **<0.001** |
| M1/M0 | 430 | 1.897 (1.029-3.496) | **0.040** | 2.339 (1.015-5.391) | **0.046** |
| Gender | Male/Female | 456 | 1.172 (0.879-1.563) | 0.281 | - | - |
| Age | >60/<=60 | 456 | 1.656 (1.251-2.192) | **<0.001** | 1.237 (0.889-1.721) | 0.207 |
| JUN | High/Low | 456 | 0.941 (0.720-1.230) | 0.655 | - | - |
| **NFKB1** | **High/Low** | **456** | **0.720 (0.550-0.941)** | **0.016** | **0.656 (0.469-0.918)** | **0.014** |
| **CASP3** | **High/Low** | **456** | **0.709 (0.542-0.929)** | **0.013** | 0.843 (0.601-1.183) | 0.323 |
| **PARP1** | **High/Low** | **456** | **1.386 (1.057-1.817)** | **0.018** | 1.230 (0.897-1.688) | 0.199 |
| TP53 | High/Low | 456 | 0.974 (0.745-1.274) | 0.849 |  |  |
| STAD | Pathologic stages | T3+T4/T1+T2 | 362 | 1.719 (1.131-2.612) | **0.011** | 1.419 (0.896-2.249) | 0.136 |
| N1+N2+N3/N0 | 352 | 1.925 (1.264-2.931) | **0.002** | 1.751 (1.111-2.759) | **0.016** |
| M1/M0 | 352 | 2.254 (1.295-3.924) | **0.004** | 2.134 (1.189-3.827) | **0.011** |
| Gender | Male/Female | 370 | 1.267 (0.891-1.804) | 0.188 | - | - |
| Age | >65/<=65 | 367 | 1.620 (1.154-2.276) | **0.005** | 1.915 (1.330-2.757) | **<0.001** |
| JUN | High/Low | 370 | 1.052 (0.758-1.460) | 0.762 | - | - |
| NFKB1 | High/Low | 370 | 1.090 (0.785-1.513) | 0.608 | - | - |
| CASP3 | High/Low | 370 | 0.780 (0.561-1.084) | 0.139 | - | - |
| PARP1 | High/Low | 370 | 0.779 (0.562-1.082) | 0.136 | - | - |
| **TP53** | **High/Low** | **370** | **0.696 (0.501-0.968)** | **0.031** | **0.666 (0.470-0.944)** | **0.022** |
| TGCT | Pathologic stages | T2+T3/T1 | 138 | 0.977 (0.127-7.541) | 0.982 | - | - |
| N1+N2/N0 | 64 | 0.000 (0.000-Inf) | 1.000 | - | - |
| M1/M0 | 124 | 0.000 (0.000-Inf) | 0.999 | - | - |
| Age | >30/<=30 | 139 | 0.382 (0.038-3.816) | 0.412 | - | - |
| JUN | High/Low | 139 | 0.718 (0.097-5.332) | 0.746 | - | - |
| NFKB1 | High/Low | 139 | 4.089 (0.399-41.857) | 0.235 | - | - |
| CASP3 | High/Low | 139 | 558853729.454 (0.000-Inf) | 0.999 | - | - |
| PARP1 | High/Low | 139 | 0.937 (0.132-6.657) | 0.948 | - | - |
| TP53 | High/Low | 139 | 2.786 (0.289-26.819) | 0.375 | - | - |
| THCA | Pathologic stages | T3+T4/T1+T2 | 508 | 2.965 (1.028-8.550) | **0.044** | 2.858 (0.750-10.892) | 0.124 |
| N1/N0 | 460 | 1.426 (0.465-4.369) | 0.535 | - | - |
| M1/M0 | 295 | 4.258 (0.909-19.952) | 0.066 | 3.603 (0.766-16.958) | 0.105 |
| Gender | Male/Female | 510 | 1.963 (0.710-5.428) | 0.193 | - | - |
| Age | >45/<=45 | 510 | 774806404.538 (0.000-Inf) | 0.997 | - | - |
| JUN | High/Low | 510 | 1.371 (0.496-3.790) | 0.543 | - | - |
| NFKB1 | High/Low | 510 | 1.667 (0.606-4.589) | 0.322 | - | - |
| CASP3 | High/Low | 510 | 0.619 (0.225-1.704) | 0.353 | - | - |
| PARP1 | High/Low | 510 | 1.955 (0.709-5.392) | 0.195 | - | - |
| TP53 | High/Low | 510 | 1.058 (0.393-2.846) | 0.912 | - | - |
| THYM | Masaoka stage | IV+III/I+II | 116 | 1.695 (0.348-8.268) | 0.514 | - | - |
| History myasthenia gravis | Yes/No | 115 | 2.178 (0.541-8.763) | 0.273 | - | - |
| Tumor site | Thymus/Anterior Mediastinum | 118 | 1.043 (0.216-5.027) | 0.958 | - | - |
| Gender | Male/Female | 118 | 0.629 (0.168-2.356) | 0.492 | - | - |
| Age | >60/<=60 | 118 | 4.117 (0.850-19.947) | 0.079 | 2.301 (0.448-11.814) | 0.318 |
| **JUN** | **High/Low** | **118** | **9.457 (1.175-76.084)** | **0.035** | 4.772 (0.548-41.583) | 0.157 |
| NFKB1 | High/Low | 118 | 1.234 (0.331-4.599) | 0.754 | - | - |
| **CASP3** | **High/Low** | **118** | **0.113 (0.014-0.905)** | **0.040** | 0.234 (0.027-2.059) | 0.191 |
| PARP1 | High/Low | 118 | 2.725 (0.558-13.313) | 0.216 | - | - |
| TP53 | High/Low | 118 | 0.519 (0.133-2.021) | 0.344 | - | - |
| UCEC | Clinical stage | Stage II+III+IV/Stage I | 551 | 3.270 (2.145-4.984) | **<0.001** | 2.972 (1.765-5.005) | **<0.001** |
| Histologic grade | G3/G1+G2 | 540 | 3.281 (1.907-5.643) | **<0.001** | 2.285 (1.252-4.168) | **0.007** |
| Tumor invasion(%) | >=50/<50 | 473 | 2.813 (1.744-4.535) | **<0.001** | 1.717 (1.006-2.929) | **0.047** |
| Age | >60/<=60 | 549 | 1.847 (1.160-2.940) | **0.010** | 1.422 (0.843-2.398) | 0.187 |
| JUN | High/Low | 551 | 1.213 (0.807-1.823) | 0.354 | - | - |
| NFKB1 | High/Low | 551 | 0.660 (0.435-1.001) | 0.050 | 0.912 (0.547-1.522) | 0.725 |
| **CASP3** | **High/Low** | **551** | **0.637 (0.420-0.966)** | **0.034** | 0.615 (0.368-1.029) | 0.064 |
| PARP1 | High/Low | 551 | 1.230 (0.820-1.845) | 0.317 | - | - |
| TP53 | High/Low | 551 | 0.727 (0.483-1.094) | 0.127 | - | - |
| UCS | Clinical stage | Stage II+III+IV/Stage I | 56 | 2.465 (1.107-5.489) | **0.027** | 2.796 (1.216-6.430) | **0.016** |
| Surgical approach | open/Minimally Invasive | 50 | 1.226 (0.579-2.597) | 0.594 | - | - |
| Hypertension | Yes/No | 51 | 1.924 (0.903-4.099) | 0.090 | 1.927 (0.872-4.259) | 0.105 |
| Age | >65/<=65 | 56 | 1.112 (0.554-2.231) | 0.765 | - | - |
| JUN | High/Low | 56 | 1.111 (0.564-2.191) | 0.760 | - | - |
| NFKB1 | High/Low | 56 | 1.368 (0.687-2.726) | 0.373 | - | - |
| CASP3 | High/Low | 56 | 0.819 (0.416-1.615) | 0.565 | - | - |
| PARP1 | High/Low | 56 | 1.189 (0.604-2.339) | 0.617 | - | - |
| **TP53** | **High/Low** | **56** | **2.088 (1.023-4.263)** | **0.043** | **2.995 (1.324-6.776)** | **0.008** |
| UVM | Pathologic stages | T4/T2+T3 | 80 | 1.738 (0.757-3.993) | 0.193 | - | - |
| NX/N0 | 79 | 0.890 (0.360-2.198) | 0.800 | - | - |
| M1+MX/M0 | 78 | 0.924 (0.373-2.287) | 0.865 | - | - |
| Gender | Male/Female | 80 | 1.542 (0.651-3.652) | 0.325 | - | - |
| Age | >60/<=60 | 80 | 2.123 (0.914-4.933) | 0.080 | 2.858 (1.188-6.875) | **0.019** |
| JUN | High/Low | 80 | 1.345 (0.579-3.125) | 0.490 | - | - |
| NFKB1 | High/Low | 80 | 1.353 (0.583-3.142) | 0.482 | - | - |
| CASP3 | High/Low | 80 | 1.564 (0.652-3.754) | 0.316 | - | - |
| **PARP1** | **High/Low** | **80** | **2.630 (1.079-6.413)** | **0.033** | **3.375 (1.353-8.423)** | **0.009** |
| TP53 | High/Low | 80 | 1.365 (0.591-3.153) | 0.467 | - | - |
| ACC | Pathologic stages | T3+T4/T1+T2 | 77 | 10.286 (3.976-26.608) | **<0.001** | 6.533 (2.155-19.800) | **<0.001** |
| N1/N0 | 77 | 2.038 (0.769-5.400) | 0.152 | - | - |
| M1/M0 | 77 | 6.150 (2.710-13.959) | **<0.001** | 1.785 (0.695-4.583) | 0.228 |
| Gender | Male/Female | 79 | 1.001 (0.469-2.137) | 0.999 | - | - |
| Age | >50/<=50 | 79 | 1.799 (0.846-3.824) | 0.127 | - | - |
| JUN | High/Low | 79 | 1.595 (0.755-3.371) | 0.221 | - | - |
| NFKB1 | High/Low | 79 | 0.542 (0.253-1.161) | 0.115 | - | - |
| **CASP3** | **High/Low** | **79** | **3.544 (1.505-8.345)** | **0.004** | **2.790 (1.161-6.706)** | **0.022** |
| **PARP1** | **High/Low** | **79** | **2.467 (1.132-5.376)** | **0.023** | 2.018 (0.872-4.673) | 0.101 |
| TP53 | High/Low | 79 | 1.735 (0.812-3.708) | 0.155 | - | - |
| BLCA | Pathologic stages | T3+T4/T1+T2 | 379 | 2.199 (1.515-3.193) | **<0.001** | 1.847 (0.967-3.526) | 0.063 |
| N1+N2+N3/N0 | 369 | 2.289 (1.678-3.122) | **<0.001** | 1.945 (1.172-3.227) | **0.010** |
| M1/M0 | 213 | 3.136 (1.503-6.544) | **0.002** | 1.219 (0.465-3.197) | 0.687 |
| Gender | Male/Female | 413 | 0.849 (0.616-1.169) | 0.316 | - | - |
| Age | >70/<=70 | 413 | 1.421 (1.063-1.901) | **0.018** | 1.195 (0.743-1.924) | 0.462 |
| **JUN** | **High/Low** | **413** | **1.418 (1.057-1.901)** | **0.020** | **1.770 (1.095-2.862)** | **0.020** |
| NFKB1 | High/Low | 413 | 0.749 (0.559-1.003) | 0.053 | 0.823 (0.502-1.351) | 0.441 |
| **CASP3** | **High/Low** | **413** | **0.704 (0.525-0.942)** | **0.018** | 0.787 (0.479-1.293) | 0.344 |
| PARP1 | High/Low | 413 | 1.071 (0.800-1.434) | 0.646 | - | - |
| TP53 | High/Low | 413 | 1.002 (0.748-1.340) | 0.992 | - | - |
| BRCA | Pathologic stages | T3+T4/T1+T2 | 1079 | 1.608 (1.110-2.329) | **0.012** | 1.333 (0.901-1.973) | 0.150 |
| N1+N2+N3/N0 | 1063 | 2.239 (1.567-3.199) | **<0.001** | 2.280 (1.572-3.308) | **<0.001** |
| Age | >60/<=60 | 1082 | 2.020 (1.465-2.784) | **<0.001** | 2.270 (1.607-3.205) | **<0.001** |
| **JUN** | **High/Low** | **1082** | **0.717 (0.521-0.987)** | **0.042** | 0.931 (0.664-1.304) | 0.676 |
| NFKB1 | High/Low | 1082 | 1.017 (0.739-1.400) | 0.916 | - | - |
| CASP3 | High/Low | 1082 | 1.216 (0.883-1.675) | 0.230 | - | - |
| PARP1 | High/Low | 1082 | 0.931 (0.677-1.281) | 0.662 | - | - |
| TP53 | High/Low | 1082 | 1.373 (0.995-1.895) | 0.054 | 1.173 (0.835-1.649) | 0.358 |
| CESC | Pathologic stages | T3+T4/T1+T2 | 243 | 1.906 (1.085-3.348) | **0.025** | 0.717 (0.319-1.610) | 0.420 |
| N1/N0 | 195 | 2.844 (1.446-5.593) | **0.002** | 3.369 (1.645-6.899) | **<0.001** |
| Age | >50/<=50 | 306 | 1.289 (0.810-2.050) | 0.284 | - | - |
| **JUN** | **High/Low** | **306** | **1.743 (1.092-2.783)** | **0.020** | **2.832 (1.348-5.948)** | **0.006** |
| NFKB1 | High/Low | 306 | 1.382 (0.862-2.215) | 0.180 | - | - |
| CASP3 | High/Low | 306 | 0.774 (0.487-1.231) | 0.280 | - | - |
| PARP1 | High/Low | 306 | 0.911 (0.574-1.448) | 0.694 | - | - |
| TP53 | High/Low | 306 | 0.749 (0.470-1.194) | 0.224 | - | - |
| CHOL | Pathologic stages | T3+T4/T1+T2 | 36 | 0.660 (0.150-2.896) | 0.582 | - | - |
| N1/N0 | 31 | 2.289 (0.602-8.700) | 0.224 | - | - |
| M1/M0 | 33 | 1.650 (0.462-5.891) | 0.440 | - | - |
| Age | >65/<=65 | 36 | 1.268 (0.499-3.221) | 0.617 | - | - |
| JUN | High/Low | 36 | 0.451 (0.166-1.221) | 0.117 | - | - |
| NFKB1 | High/Low | 36 | 1.482 (0.561-3.915) | 0.427 | - | - |
| CASP3 | High/Low | 36 | 1.169 (0.446-3.067) | 0.751 | - | - |
| PARP1 | High/Low | 36 | 1.005 (0.383-2.637) | 0.992 | - | - |
| TP53 | High/Low | 36 | 1.148 (0.447-2.944) | 0.775 | - | - |
| COAD | Pathologic stages | T3+T4/T1+T2 | 476 | 3.072 (1.423-6.631) | **0.004** | 3.873 (1.191-12.595) | **0.024** |
| N1+N2/N0 | 477 | 2.592 (1.743-3.855) | **<0.001** | 1.540 (0.920-2.578) | 0.101 |
| M1/M0 | 414 | 4.193 (2.683-6.554) | **<0.001** | 2.853 (1.682-4.840) | <0.001 |
| Gender | Male/Female | 477 | 1.101 (0.746-1.625) | 0.627 | - | - |
| Age | >65/<=65 | 477 | 1.610 (1.052-2.463) | **0.028** | 2.094 (1.293-3.394) | **0.003** |
| JUN | High/Low | 477 | 1.025 (0.696-1.510) | 0.900 | - | - |
| NFKB1 | High/Low | 477 | 0.851 (0.575-1.259) | 0.418 | - | - |
| **CASP3** | **High/Low** | **477** | **0.651 (0.438-0.966)** | **0.033** | 0.799 (0.508-1.256) | 0.330 |
| PARP1 | High/Low | 477 | 0.830 (0.562-1.227) | 0.350 | - | - |
| TP53 | High/Low | 477 | 0.841 (0.570-1.240) | 0.381 | - | - |
| DLBC | Clinical stage | Stage III+IV/Stage I+II | 42 | 1.917 (0.422-8.715) | 0.400 | - | - |
| Gender | Male/Female | 48 | 1.039 (0.250-4.324) | 0.958 | - | - |
| Age | >60/<=60 | 48 | 1.666 (0.416-6.673) | 0.471 | - | - |
| JUN | High/Low | 48 | 0.908 (0.220-3.754) | 0.894 | - | - |
| NFKB1 | High/Low | 48 | 1.268 (0.307-5.233) | 0.742 | - | - |
| CASP3 | High/Low | 48 | 0.904 (0.225-3.629) | 0.887 | - | - |
| PARP1 | High/Low | 48 | 0.657 (0.157-2.758) | 0.566 | - | - |
| TP53 | High/Low | 48 | 0.613 (0.146-2.584) | 0.505 | - | - |
| ESCA | Pathologic stages | T3+T4/T1+T2 | 145 | 1.312 (0.756-2.277) | 0.334 | - | - |
| N1+N2+N3/N0 | 144 | 2.970 (1.606-5.493) | **<0.001** | 2.512 (1.242-5.080) | **0.010** |
| M1/M0 | 129 | 5.075 (2.312-11.136) | **<0.001** | 3.676 (1.658-8.151) | **0.001** |
| Gender | Male/Female | 162 | 2.306 (0.922-5.770) | 0.074 | 2.393 (0.707-8.103) | 0.161 |
| Age | >60/<=60 | 162 | 0.831 (0.506-1.365) | 0.466 | - | - |
| **JUN** | **High/Low** | **162** | **1.740 (1.044-2.902)** | **0.034** | **1.931 (1.037-3.598)** | **0.038** |
| NFKB1 | High/Low | 162 | 0.843 (0.513-1.387) | 0.502 | - | - |
| CASP3 | High/Low | 162 | 1.093 (0.667-1.790) | 0.725 | - | - |
| PARP1 | High/Low | 162 | 1.102 (0.673-1.805) | 0.700 | - | - |
| TP53 | High/Low | 162 | 0.755 (0.459-1.243) | 0.270 | - | - |
| GBM | Gender | Male/Female | 168 | 1.026 (0.719-1.466) | 0.887 | - | - |
| IDH status | Mut/WT | 161 | 0.301 (0.138-0.654) | **0.002** | 0.318 (0.142-0.710) | **0.005** |
| Age | >60/<=60 | 168 | 1.365 (0.973-1.915) | 0.072 | 1.099 (0.769-1.571) | 0.605 |
| JUN | High/Low | 168 | 1.156 (0.821-1.627) | 0.407 | - | - |
| NFKB1 | High/Low | 168 | 0.888 (0.633-1.246) | 0.491 | - | - |
| CASP3 | High/Low | 168 | 1.131 (0.805-1.589) | 0.479 | - | - |
| PARP1 | High/Low | 168 | 1.217 (0.863-1.716) | 0.263 | - | - |
| TP53 | High/Low | 168 | 0.994 (0.707-1.397) | 0.973 | - | - |
| HNSC | Gender | Male/Female | 501 | 0.764 (0.574-1.018) | 0.066 | 0.764 (0.574-1.018) | 0.066 |
| Age | >60/<=60 | 501 | 1.252 (0.956-1.639) | 0.102 | - | - |
| JUN | High/Low | 501 | 0.900 (0.689-1.175) | 0.439 | - | - |
| NFKB1 | High/Low | 501 | 0.884 (0.677-1.154) | 0.363 | - | - |
| CASP3 | High/Low | 501 | 1.135 (0.869-1.482) | 0.353 | - | - |
| PARP1 | High/Low | 501 | 1.024 (0.784-1.336) | 0.863 | - | - |
| TP53 | High/Low | 501 | 0.919 (0.704-1.200) | 0.535 | - | - |
| KICH | Pathologic stages | T3+T4/T1+T2 | 64 | 10.121 (2.098-48.814) | **0.004** | - | - |
| N1+N2/N0 | 43 | 30240971662.269 (0.000-Inf) | 0.999 | - | - |
| M1/M0 | 36 | 16.493 (1.495-181.921) | **0.022** | - | - |
| Gender | Male/Female | 64 | 1.528 (0.381-6.125) | 0.550 | - | - |
| Age | >50/<=50 | 64 | 3.847 (0.797-18.561) | 0.093 | - | - |
| JUN | High/Low | 64 | 0.263 (0.054-1.269) | 0.096 | - | - |
| NFKB1 | High/Low | 64 | 1.341 (0.360-4.998) | 0.662 | - | - |
| CASP3 | High/Low | 64 | 1.449 (0.388-5.407) | 0.581 | - | - |
| PARP1 | High/Low | 64 | 4.170 (0.862-20.165) | 0.076 | - | - |
| TP53 | High/Low | 64 | 1.369 (0.367-5.104) | 0.640 | - | - |
| KIRC | Pathologic stages | T3+T4/T2+T1 | 539 | 3.228 (2.382-4.374) | **<0.001** | 2.314 (1.486-3.605) | **<0.001** |
| N1/N0 | 257 | 3.453 (1.832-6.508) | **<0.001** | 2.379 (1.220-4.641) | **0.011** |
| M1/M0 | 506 | 4.389 (3.212-5.999) | **<0.001** | 3.654 (2.292-5.826) | **<0.001** |
| Gender | Male/Female | 539 | 0.930 (0.682-1.268) | 0.648 | - | - |
| Age | >60/<=60 | 539 | 1.765 (1.298-2.398) | **<0.001** | 1.854 (1.209-2.843) | **0.005** |
| JUN | High/Low | 539 | 0.889 (0.659-1.199) | 0.440 | - | - |
| **NFKB1** | **High/Low** | **539** | **0.493 (0.361-0.674)** | **<0.001** | **0.390 (0.251-0.607)** | **<0.001** |
| CASP3 | High/Low | 539 | 1.270 (0.941-1.714) | 0.119 | - | - |
| PARP1 | High/Low | 539 | 1.196 (0.887-1.614) | 0.241 | - | - |
| TP53 | High/Low | 539 | 1.285 (0.951-1.737) | 0.102 | - | - |
| KIRP | Pathologic stages | T2+T3+T4/T1 | 286 | 5.074 (2.637-9.765) | **<0.001** | 0.818 (0.162-4.133) | 0.808 |
| N1+N2/N0 | 77 | 5.003 (2.062-12.140) | **<0.001** | 2.085 (0.432-10.070) | 0.360 |
| M1/M0 | 104 | 114.966 (22.481-587.925) | **<0.001** | 85.217 (6.968-1042.150) | **<0.001** |
| Gender | Male/Female | 288 | 0.638 (0.331-1.230) | 0.180 | - | - |
| Age | >60/<=60 | 286 | 0.944 (0.519-1.718) | 0.851 | - | - |
| JUN | High/Low | 288 | 0.971 (0.537-1.755) | 0.921 | - | - |
| NFKB1 | High/Low | 288 | 0.636 (0.348-1.161) | 0.140 | - | - |
| CASP3 | High/Low | 288 | 1.480 (0.811-2.703) | 0.202 | - | - |
| **PARP1** | **High/Low** | **288** | **2.127 (1.147-3.942)** | **0.017** | 3.284 (0.871-12.385) | 0.079 |
| TP53 | High/Low | 288 | 1.332 (0.729-2.435) | 0.351 | - | - |
| LAML | Gender | Male/Female | 140 | 1.030 (0.674-1.572) | 0.892 | - | - |
| WBC count(x10^9/L) | >20/<=20 | 139 | 1.161 (0.760-1.772) | 0.490 | - | - |
| Age | >60/<=60 | 140 | 3.333 (2.164-5.134) | **<0.001** | 3.442 (2.228-5.318) | **<0.001** |
| JUN | High/Low | 140 | 0.662 (0.433-1.011) | 0.056 | 0.635 (0.414-0.974) | **0.037** |
| NFKB1 | High/Low | 140 | 1.209 (0.792-1.845) | 0.380 | - | - |
| CASP3 | High/Low | 140 | 0.734 (0.481-1.120) | 0.152 | - | - |
| **PARP1** | **High/Low** | **140** | **1.592 (1.042-2.432)** | **0.031** | 1.500 (0.979-2.298) | 0.063 |
| TP53 | High/Low | 140 | 0.927 (0.608-1.412) | 0.724 | - | - |
| LGG | WHO grade | G3/G2 | 466 | 3.059 (2.046-4.573) | **<0.001** | 1.840 (1.159-2.922) | **0.010** |
| 1p/19q codeletion | non-codel/codel | 527 | 2.493 (1.590-3.910) | **<0.001** | 1.908 (1.087-3.351) | **0.025** |
| IDH status | Mut/WT | 524 | 0.186 (0.130-0.265) | **<0.001** | 0.369 (0.220-0.618) | **<0.001** |
| Gender | Male/Female | 527 | 1.124 (0.800-1.580) | 0.499 | - | - |
| Age | >40/<=40 | 527 | 2.889 (2.009-4.155) | **<0.001** | 3.244 (2.092-5.031) | **<0.001** |
| **JUN** | **High/Low** | **527** | **1.852 (1.305-2.627)** | **<0.001** | 1.216 (0.791-1.868) | 0.373 |
| **NFKB1** | **High/Low** | **527** | **1.772 (1.251-2.510)** | **0.001** | 1.008 (0.671-1.515) | 0.968 |
| **CASP3** | **High/Low** | **527** | **1.932 (1.368-2.728)** | **<0.001** | 1.109 (0.683-1.798) | 0.676 |
| PARP1 | High/Low | 527 | 0.828 (0.590-1.163) | 0.276 | - | - |
| **TP53** | **High/Low** | **527** | **1.558 (1.104-2.197)** | **0.012** | 1.370 (0.887-2.118) | 0.156 |
| LIHC | Pathologic stage | T3+T4/T1+T2 | 370 | 2.598 (1.826-3.697) | **<0.001** | 2.638 (1.852-3.758) | **<0.001** |
| Gender | Male/Female | 373 | 0.793 (0.557-1.130) | 0.200 | - | - |
| Age | >60/<=60 | 373 | 1.205 (0.850-1.708) | 0.295 | - | - |
| JUN | High/Low | 373 | 1.378 (0.972-1.954) | 0.072 | 1.391 (0.976-1.985) | 0.068 |
| NFKB1 | High/Low | 373 | 1.357 (0.959-1.920) | 0.085 | 1.314 (0.924-1.868) | 0.129 |
| CASP3 | High/Low | 373 | 1.250 (0.885-1.766) | 0.205 | - | - |
| PARP1 | High/Low | 373 | 1.312 (0.929-1.852) | 0.123 | - | - |
| TP53 | High/Low | 373 | 1.128 (0.799-1.592) | 0.494 | - | - |
| LUAD | Pathologic stages | T3+T4/T1+T2 | 523 | 2.317 (1.591-3.375) | **<0.001** | 2.073 (1.369-3.139) | **<0.001** |
| N1+N2+N3/N0 | 510 | 2.601 (1.944-3.480) | **<0.001** | 2.432 (1.745-3.390) | **<0.001** |
| M1/M0 | 377 | 2.136 (1.248-3.653) | **0.006** | 1.524 (0.850-2.731) | 0.157 |
| Gender | Male/Female | 526 | 1.070 (0.803-1.426) | 0.642 | - | - |
| Age | >65/<=65 | 516 | 1.223 (0.916-1.635) | 0.172 | - | - |
| JUN | High/Low | 526 | 1.086 (0.815-1.446) | 0.574 | - | - |
| NFKB1 | High/Low | 526 | 0.966 (0.725-1.286) | 0.812 | - | - |
| CASP3 | High/Low | 526 | 0.950 (0.713-1.266) | 0.728 | - | - |
| PARP1 | High/Low | 526 | 1.005 (0.755-1.338) | 0.972 | - | - |
| TP53 | High/Low | 526 | 1.008 (0.757-1.343) | 0.955 | - | - |
| LUSC | T stage  N stage | T2+T3+T4/T1 | 496 | 1.377 (0.984-1.926) | 0.062 | 1.301 (0.928-1.822) | 0.126 |
| N1+N2+N3/N0 | 490 | 1.151 (0.869-1.523) | 0.327 | - | - |
| Gender | Male/Female | 496 | 1.211 (0.879-1.669) | 0.241 | - | - |
| Age | >65/<=65 | 490 | 1.279 (0.960-1.704) | 0.093 | 1.288 (0.966-1.717) | 0.085 |
| JUN | High/Low | 496 | 1.139 (0.869-1.493) | 0.345 | - | - |
| NFKB1 | High/Low | 496 | 1.272 (0.970-1.670) | 0.082 | 1.239 (0.943-1.627) | 0.124 |
| CASP3 | High/Low | 496 | 0.805 (0.614-1.055) | 0.116 | - | - |
| PARP1 | High/Low | 496 | 0.916 (0.699-1.200) | 0.523 | - | - |
| TP53 | High/Low | 496 | 0.899 (0.686-1.179) | 0.442 | - | - |
| MESO | Pathologic stages | T3+T4/T1+T2 | 83 | 0.955 (0.590-1.547) | 0.852 | - | - |
| N1+N2+N3/N0 | 81 | 0.904 (0.557-1.467) | 0.683 | - | - |
| M1/M0 | 59 | 1.917 (0.454-8.089) | 0.376 | - | - |
| Gender | Male/Female | 85 | 0.944 (0.516-1.726) | 0.850 | - | - |
| Age | >65/<=65 | 85 | 1.296 (0.805-2.085) | 0.286 | - | - |
| JUN | High/Low | 85 | 1.325 (0.826-2.127) | 0.243 | - | - |
| NFKB1 | High/Low | 85 | 0.703 (0.437-1.129) | 0.144 | - | - |
| CASP3 | High/Low | 85 | 0.996 (0.622-1.594) | 0.987 | - | - |
| **PARP1** | **High/Low** | **85** | **1.919 (1.177-3.129)** | **0.009** | **1.919 (1.177-3.129)** | **0.009** |
| TP53 | High/Low | 85 | 1.092 (0.685-1.739) | 0.713 | - | - |
| OV | FIGO stage | Stage III+IV/Stage I+II | 374 | 2.115 (0.938-4.766) | 0.071 | 2.258 (0.999-5.105) | 0.050 |
| Histologic grade | G3+G4/G1+G2 | 367 | 1.229 (0.830-1.818) | 0.303 | - | - |
| Lymphatic invasion | Yes/No | 148 | 1.413 (0.833-2.396) | 0.200 | - | - |
| Venous invasion | Yes/No | 105 | 0.896 (0.487-1.649) | 0.723 | - | - |
| Age | >60/<=60 | 377 | 1.355 (1.046-1.754) | **0.021** | 1.362 (1.051-1.765) | **0.019** |
| **JUN** | **High/Low** | **377** | **1.299 (1.001-1.685)** | **0.049** | **1.323 (1.018-1.720)** | **0.036** |
| NFKB1 | High/Low | 377 | 1.230 (0.949-1.594) | 0.117 | - | - |
| CASP3 | High/Low | 377 | 0.802 (0.618-1.040) | 0.096 | 0.806 (0.620-1.046) | 0.105 |
| PARP1 | High/Low | 377 | 0.924 (0.713-1.197) | 0.548 | - | - |
| TP53 | High/Low | 377 | 1.049 (0.810-1.358) | 0.717 | - | - |
| PAAD | Pathologic stages | T4+T3/T1+T2 | 176 | 2.023 (1.072-3.816) | **0.030** | 1.220 (0.624-2.384) | 0.561 |
| N1/N0 | 173 | 2.154 (1.282-3.618) | **0.004** | 1.900 (1.100-3.283) | **0.021** |
| M1/M0 | 84 | 0.756 (0.181-3.157) | 0.701 | - | - |
| Gender | Male/Female | 178 | 0.809 (0.537-1.219) | 0.311 | - | - |
| Age | >65/<=65 | 178 | 1.290 (0.854-1.948) | 0.227 | - | - |
| JUN | High/Low | 178 | 0.963 (0.637-1.455) | 0.857 | - | - |
| NFKB1 | High/Low | 178 | 1.057 (0.700-1.594) | 0.793 | - | - |
| CASP3 | High/Low | 178 | 1.495 (0.987-2.262) | 0.057 | 1.139 (0.740-1.753) | 0.555 |
| PARP1 | High/Low | 178 | 1.094 (0.726-1.650) | 0.667 | - | - |
| TP53 | High/Low | 178 | 1.062 (0.703-1.606) | 0.774 | - | - |
| PCPG | Histological type | Pheochromocytoma/Paraganglioma | 183 | 0.244 (0.058-1.035) | 0.056 | 0.220 (0.048-1.006) | 0.051 |
| Gender | Male/Female | 183 | 4.493 (0.879-22.957) | 0.071 | 3.294 (0.661-16.425) | 0.146 |
| Age | >50/<=50 | 183 | 2.794 (0.666-11.725) | 0.160 | - | - |
| **JUN** | **High/Low** | **183** | **0.119 (0.015-0.974)** | **0.047** | 0.125 (0.015-1.045) | 0.055 |
| NFKB1 | High/Low | 183 | 0.626 (0.146-2.690) | 0.529 | - | - |
| CASP3 | High/Low | 183 | 0.650 (0.155-2.727) | 0.556 | - | - |
| PARP1 | High/Low | 183 | 1.543 (0.368-6.476) | 0.553 | - | - |
| TP53 | High/Low | 183 | 1.454 (0.339-6.226) | 0.614 | - | - |
| PRAD | Age | >60/<=60 | 499 | 1.577 (0.440-5.648) | 0.484 | - | - |
| JUN | High/Low | 499 | 1.308 (0.362-4.724) | 0.682 | - | - |
| NFKB1 | High/Low | 499 | 0.493 (0.126-1.925) | 0.309 | - | - |
| CASP3 | High/Low | 499 | 1.396 (0.394-4.951) | 0.605 | - | - |
| PARP1 | High/Low | 499 | 1.336 (0.379-4.703) | 0.652 | - | - |
| **TP53** | **High/Low** | **499** | **17.756 (2.093-150.654)** | **0.008** | **17.756 (2.093-150.654)** | **0.008** |
| READ | Pathologic stages | T3+T4/T1+T2 | 164 | 1.408 (0.476-4.159) | 0.536 | - | - |
| N1+N2/N0 | 162 | 3.021 (1.244-7.336) | **0.015** | 2.506 (0.899-6.982) | 0.079 |
| M1/M0 | 149 | 3.412 (1.424-8.174) | **0.006** | 2.136 (0.827-5.516) | 0.117 |
| Gender | Male/Female | 166 | 0.916 (0.422-1.988) | 0.824 | - | - |
| Age | >65/<=65 | 166 | 3.843 (1.535-9.622) | **0.004** | 5.969 (2.014-17.689) | **0.001** |
| JUN | High/Low | 166 | 1.222 (0.564-2.650) | 0.612 | - | - |
| **NFKB1** | **High/Low** | **166** | **0.422 (0.188-0.951)** | **0.037** | 0.459 (0.185-1.138) | 0.093 |
| CASP3 | High/Low | 166 | 0.830 (0.383-1.797) | 0.637 | - | - |
| PARP1 | High/Low | 166 | 1.041 (0.480-2.260) | 0.919 | - | - |
| TP53 | High/Low | 166 | 1.135 (0.522-2.468) | 0.750 | - | - |
| SARC | Margin status | Positive/Negative | 213 | 1.957 (1.215-3.151) | **0.006** | 2.144 (1.283-3.580) | **0.004** |
| Gender | Male/Female | 263 | 0.905 (0.607-1.349) | 0.623 | - | - |
| Age | >60/<=60 | 263 | 1.285 (0.864-1.911) | 0.216 | - | - |
| Metastasis | Yes/No | 179 | 2.888 (1.762-4.732) | **<0.001** | 2.773 (1.666-4.618) | **<0.001** |
| JUN | High/Low | 263 | 1.080 (0.728-1.603) | 0.702 | - | - |
| NFKB1 | High/Low | 263 | 0.950 (0.640-1.409) | 0.798 | - | - |
| CASP3 | High/Low | 263 | 1.221 (0.821-1.814) | 0.324 | - | - |
| PARP1 | High/Low | 263 | 1.145 (0.772-1.699) | 0.500 | - | - |
| TP53 | High/Low | 263 | 1.099 (0.741-1.631) | 0.638 | - | - |
| Parameters with P-value<0.05 were highlighted in bold. | | | | | | | |

| Table S3. The association between the five hub genes expression and survival of human cancers in different database | | | | | | | | | | | |
| --- | --- | --- | --- | --- | --- | --- | --- | --- | --- | --- | --- |
| Genes | Role | GEPIA2 | | Kaplan-Meier plotter | PrognoScan | | | | | TCGA (COX) | GSCALite |
| OS | DFS | OS | OS | DFS | DSS | DMFS | RFS | OS | OS |
| JUN | Protective | CHOL, KIRC, | THCA | PCPG, **BRCA** | **Breast**, Prostate | **Breast**, | Blood, | **Breast**, | **Breast** | **BRCA**, PCPG | SKCM, **BRCA** |
| Detrimental | BLCA, CESC, ESCA, **LGG**, LIHC | **LGG** | LIHC, ESCA, BLCA, CESC, LUSC | Breast, Colorectal, **Brain**, Blood, | Colorectal | Colorectal | - | - | THYM, BLCA, CESC, ESCA, **LGG**, OV | **LGG**, CESC, LUSC |
| NFKB1 | Protective | BLCA, **KIRC**, READ | **KIRC** | KIRP, READ, UCEC, STAD,BLCA | Bladder, Lung, Breast, **Renal** | - | Bladder | Breast | - | SKCM, **KIRC**, READ | **KIRC**, |
| Detrimental | CESC, **LGG**, LUSC, OV | - | CESC, OV, LUSC | **Brain** | - | - | - | - | **LGG** | **LGG**, THYM, LUSC |
| CASP3 | Protective | - | - | UCEC, STAD, BLCA, OV, LUSC | - | - | - | - | - | SKCM,THYM, UCEC,BLCA, COAD, | THYM, STAD |
| Detrimental | **ACC**, **GBM**. **LGG** | **ACC**, **GBM**, **LGG**, SARC, UVM | KIRC, LIHC, PAAD | Prostate, **Brain**, Lung | Breast | Breast | - | Breast, Lung | **ACC,LGG** | **LGG**, KIRC, **ACC** |
| PARP1 | Protective | - | GBM | READ | Blood, Breast, Lung | Colorectal | - | - | - | - | - |
| Detrimental | **ACC**, MESO, SKCM | **ACC**, UVM | **KIRC**, **KIRP**, LIHC, THCA | Brain, **Renal**, Lung | Breast | Bladder, Breast, Blood | Eye, Breast | Breast, Lung | SKCM, UVM, **ACC**,**KIRP**, LAML, MESO | LGG, **ACC**, SKCM, ESCA, **KICH**, **KIRP**, MESO |
| TP53 | Protective | COAD | PRAD | LIHC, UCEC, ESCA, **STAD**, CESC | Blood, Bladder, Lung | - | Blood | Breast | Breast | **STAD** | THYM, CESC, **STAD** |
| Detrimental | BRCA, **LGG**, MESO, PRAD | - | KIRC, LIHC, PAAD | **Brain**, Breast | Breast | - | Breast | - | UCS, **LGG**, PRAD | **LGG**, KIRC |
| Significance of bold indicated that the expression level of specific gene was significantly correlated with the prognosis for these cancers, and this correlation is consistent across different databases. | | | | | | | | | | | |

| Table S4. Co-expression of cell death-related gene and top 20 most correlated genes in LGG | | | | | |
| --- | --- | --- | --- | --- | --- |
| Genes | Correlated Genes | Cytoband | Spearman's Correlation | P-value | Q-value |
| JUN | ZFP36 | 19q13.2 | 0.779 | 9.74E-106 | 1.96E-101 |
| JUN | FOS | 14q24.3 | 0.759 | 2.58E-97 | 2.6E-93 |
| JUN | JUNB | 19p13.13 | 0.757 | 8.26E-97 | 5.55E-93 |
| JUN | EGR1 | 5q31.2 | 0.722 | 7.28E-84 | 3.67E-80 |
| JUN | CCN1 | 1p22.3 | 0.716 | 8.52E-82 | 3.44E-78 |
| JUN | CEBPD | 8q11.21 | 0.683 | 8.57E-72 | 2.88E-68 |
| JUN | ATF3 | 1q32.3 | 0.681 | 2.83E-71 | 8.15E-68 |
| JUN | CEBPB | 20q13.13 | 0.68 | 6.38E-71 | 1.61E-67 |
| JUN | DUSP1 | 5q35.1 | 0.677 | 4.11E-70 | 9.2E-67 |
| JUN | GADD45A | 1p31.3 | 0.661 | 8.43E-66 | 1.7E-62 |
| JUN | SERTAD1 | 19q13.2 | 0.659 | 3.32E-65 | 6.08E-62 |
| JUN | TNFRSF12A | 16p13.3 | 0.644 | 1.43E-61 | 2.41E-58 |
| JUN | GADD45B | 19p13.3 | 0.643 | 3.48E-61 | 5.39E-58 |
| JUN | EGR2 | 10q21.3 | 0.639 | 2.99E-60 | 4.31E-57 |
| JUN | OSM | 22q12.2 | 0.638 | 3.48E-60 | 4.67E-57 |
| JUN | GEM | 8q22.1 | 0.635 | 1.79E-59 | 2.26E-56 |
| JUN | PLK3 | 1p34.1 | 0.63 | 3.82E-58 | 4.53E-55 |
| JUN | ITPKC | 19q13.2 | 0.626 | 2.39E-57 | 2.68E-54 |
| JUN | PPP1R15A | 19q13.33 | 0.626 | 3.3E-57 | 3.47E-54 |
| JUN | SERTAD3 | 19q13.2 | 0.626 | 3.44E-57 | 3.47E-54 |
| NFKB1 | ELF4 | Xq26.1 | 0.694 | 4.74E-75 | 9.55E-71 |
| NFKB1 | RUNDC3A | 17q21.31 | -0.69 | 5.07E-74 | 5.11E-70 |
| NFKB1 | ITPRIPL2 | 16p12.3 | 0.684 | 2.84E-72 | 1.91E-68 |
| NFKB1 | RBM47 | 4p14 | 0.681 | 3.3E-71 | 1.67E-67 |
| NFKB1 | MOB1A | 2p13.1 | 0.673 | 3.83E-69 | 1.54E-65 |
| NFKB1 | TLN1 | 9p13.3 | 0.67 | 3.7E-68 | 1.24E-64 |
| NFKB1 | IRF2 | 4q35.1 | 0.666 | 2.83E-67 | 8.15E-64 |
| NFKB1 | ELF1 | 13q14.11 | 0.665 | 6.1E-67 | 1.54E-63 |
| NFKB1 | SLC10A7 | 4q31.22 | 0.664 | 9.57E-67 | 2.14E-63 |
| NFKB1 | TNFSF8 | 9q32-q33.1 | 0.662 | 4.25E-66 | 8.58E-63 |
| NFKB1 | PARP14 | 3q21.1 | 0.659 | 2.74E-65 | 5.02E-62 |
| NFKB1 | SOAT1 | 1q25.2 | 0.653 | 7.82E-64 | 1.31E-60 |
| NFKB1 | NAGA | 22q13.2 | 0.653 | 1.12E-63 | 1.73E-60 |
| NFKB1 | TFEC | 7q31.2 | 0.652 | 2.05E-63 | 2.95E-60 |
| NFKB1 | NFATC2 | 20q13.2 | 0.651 | 2.31E-63 | 3.11E-60 |
| NFKB1 | ARHGAP30 | 1q23.3 | 0.651 | 3.35E-63 | 4.22E-60 |
| NFKB1 | SLC39A1 | 1q21.3 | 0.65 | 5.53E-63 | 6.56E-60 |
| NFKB1 | SIGLEC9 | 19q13.41 | 0.645 | 6.96E-62 | 7.79E-59 |
| NFKB1 | RTN4R | 22q11.21 | -0.645 | 8.99E-62 | 9.54E-59 |
| NFKB1 | PTPRC | 1q31.3-q32.1 | 0.644 | 1.54E-61 | 1.55E-58 |
| CASP3 | BZW1 | 2q33.1 | 0.632 | 1.13E-58 | 2.27E-54 |
| CASP3 | OSTC | 4q25 | 0.595 | 1.45E-50 | 1.46E-46 |
| CASP3 | DUSP26 | 8p12 | -0.566 | 7.77E-45 | 5.22E-41 |
| CASP3 | TRIM5 | 11p15.4 | 0.544 | 5.58E-41 | 2.81E-37 |
| CASP3 | SNRPN | 15q11.2 | -0.525 | 9.79E-38 | 3.95E-34 |
| CASP3 | ELMOD2 | 4q31.1 | 0.523 | 1.72E-37 | 5.05E-34 |
| CASP3 | NCKIPSD | 3p21.31 | -0.523 | 1.75E-37 | 5.05E-34 |
| CASP3 | TGIF2 | 20q11.23 | 0.523 | 2.02E-37 | 5.1E-34 |
| CASP3 | KDELR2 | 7p22.1 | 0.52 | 7.21E-37 | 1.62E-33 |
| CASP3 | EZH1 | 17q21.2 | -0.515 | 3.31E-36 | 6.68E-33 |
| CASP3 | MMP14 | 14q11.2 | 0.513 | 8.53E-36 | 1.56E-32 |
| CASP3 | PPP1R3E | 14q11.2 | -0.512 | 1.04E-35 | 1.75E-32 |
| CASP3 | PALLD | 4q32.3 | 0.51 | 1.91E-35 | 2.96E-32 |
| CASP3 | TSPYL2 | Xp11.22 | -0.508 | 4.11E-35 | 5.92E-32 |
| CASP3 | DDX60 | 4q32.3 | 0.508 | 4.83E-35 | 6.11E-32 |
| CASP3 | CMTM6 | 3p22.3 | 0.508 | 4.85E-35 | 6.11E-32 |
| CASP3 | CASP6 | 4q25 | 0.507 | 7.1E-35 | 8.42E-32 |
| CASP3 | TNFRSF19 | 13q12.12 | 0.504 | 1.6E-34 | 1.8E-31 |
| CASP3 | CNNM2 | 10q24.32 | -0.504 | 1.77E-34 | 1.88E-31 |
| CASP3 | ZBTB4 | 17p13.1 | -0.501 | 5.18E-34 | 5.02E-31 |
| PARP1 | UBE2B | 5q31.1 | -0.524 | 1.47E-37 | 2.96E-33 |
| PARP1 | URB2 | 1q42.13 | 0.506 | 1.06E-34 | 1.07E-30 |
| PARP1 | SMC1A | Xp11.22 | 0.483 | 1.99E-31 | 1.34E-27 |
| PARP1 | NUP133 | 1q42.13 | 0.475 | 2.58E-30 | 1.3E-26 |
| PARP1 | ANKRD13D | 11q13.2 | -0.46 | 3.2E-28 | 1.29E-24 |
| PARP1 | FAM120C | Xp11.22 | 0.451 | 4.63E-27 | 1.56E-23 |
| PARP1 | FADS3 | 11q12.2 | -0.45 | 5.68E-27 | 1.63E-23 |
| PARP1 | GART | 21q22.11 | 0.446 | 1.84E-26 | 4.64E-23 |
| PARP1 | MRPL19 | 2p12 | 0.441 | 7.25E-26 | 1.62E-22 |
| PARP1 | YPEL3 | 16p11.2 | -0.439 | 1.2E-25 | 2.43E-22 |
| PARP1 | DCAF7 | 17q23.3 | 0.435 | 3.66E-25 | 6.7E-22 |
| PARP1 | PRKDC | 8q11.21 | 0.434 | 4.91E-25 | 8.25E-22 |
| PARP1 | GORASP2 | 2q31.1 | 0.433 | 7.5E-25 | 1.16E-21 |
| PARP1 | RBM8A | 1q21.1 | 0.431 | 1.01E-24 | 1.45E-21 |
| PARP1 | QKI | 6q26 | 0.429 | 2.01E-24 | 2.71E-21 |
| PARP1 | ARPIN | 15q26.1 | 0.426 | 4.24E-24 | 5.34E-21 |
| PARP1 | SKP2 | 5p13.2 | 0.421 | 1.87E-23 | 2.22E-20 |
| PARP1 | FAM174A | 5q21.1 | -0.418 | 3.78E-23 | 4.24E-20 |
| PARP1 | APBB3 | 5q31.3 | -0.415 | 7.97E-23 | 8.45E-20 |
| PARP1 | SMC2 | 9q31.1 | 0.415 | 8.79E-23 | 8.86E-20 |
| TP53 | XPO5 | 6p21.1 | 0.607 | 5.22E-53 | 1.05E-48 |
| TP53 | TLCD4 | 1p21.3 | -0.597 | 4.71E-51 | 4.75E-47 |
| TP53 | RNASEH2A | 19p13.13 | 0.59 | 1.86E-49 | 1.25E-45 |
| TP53 | LMNB1 | 5q23.2 | 0.587 | 5.21E-49 | 2.63E-45 |
| TP53 | DNMT1 | 19p13.2 | 0.586 | 8.73E-49 | 3.52E-45 |
| TP53 | BYSL | 6p21.1 | 0.582 | 5.91E-48 | 1.99E-44 |
| TP53 | XXYLT1 | 3q29 | 0.578 | 3.07E-47 | 8.86E-44 |
| TP53 | SH3GL1 | 19p13.3 | 0.569 | 1.61E-45 | 4.06E-42 |
| TP53 | CDK4 | 12q14.1 | 0.567 | 3.97E-45 | 8.89E-42 |
| TP53 | NKIRAS2 | 17q21.2 | 0.565 | 8.97E-45 | 1.68E-41 |
| TP53 | EIF4A1 | 17p13.1 | 0.565 | 9.18E-45 | 1.68E-41 |
| TP53 | DDX39A | 19p13.12 | 0.554 | 1.01E-42 | 1.7E-39 |
| TP53 | TIMELESS | 12q13.3 | 0.554 | 1.16E-42 | 1.8E-39 |
| TP53 | SF3B4 | 1q21.2 | 0.554 | 1.31E-42 | 1.83E-39 |
| TP53 | ILF2 | 1q21.3 | 0.553 | 1.36E-42 | 1.83E-39 |
| TP53 | SMARCD1 | 12q13.12 | 0.553 | 1.73E-42 | 2.18E-39 |
| TP53 | HELLS | 10q23.33 | 0.552 | 2.19E-42 | 2.59E-39 |
| TP53 | CBX7 | 22q13.1 | -0.552 | 2.52E-42 | 2.82E-39 |
| TP53 | SETDB1 | 1q21.3 | 0.551 | 4E-42 | 4.24E-39 |
| TP53 | EPS15 | 1p32.3 | -0.55 | 6.56E-42 | 6.62E-39 |
| LGG: Brain Lower Grade Glioma | | | | | |

| Table S5. Co-expression of cell death-related gene and top 20 most correlated genes in ACC | | | | | |
| --- | --- | --- | --- | --- | --- |
| Genes | Correlated Genes | Cytoband | Spearman's Correlation | P-value | Q-value |
| JUN | COQ6 | 14q24.3 | -0.592 | 1.18E-08 | 1.55E-04 |
| JUN | TDO2 | 4q32.1 | 0.587 | 1.57E-08 | 1.55E-04 |
| JUN | SOCS3 | 17q25.3 | 0.553 | 1.54E-07 | 1.01E-03 |
| JUN | PLAUR | 19q13.31 | 0.539 | 3.55E-07 | 1.49E-03 |
| JUN | RASSF1 | 3p21.31 | 0.538 | 3.78E-07 | 1.49E-03 |
| JUN | MMD | 17q22 | 0.528 | 6.58E-07 | 2.16E-03 |
| JUN | SH3GLB1 | 1p22.3 | 0.52 | 1.08E-06 | 2.52E-03 |
| JUN | YWHAH | 22q12.3 | 0.519 | 1.10E-06 | 2.52E-03 |
| JUN | FGL1 | 8p22 | 0.519 | 1.15E-06 | 2.52E-03 |
| JUN | COL4A1 | 13q34 | 0.514 | 1.48E-06 | 2.92E-03 |
| JUN | ITGB3 | 17q21.32 | 0.511 | 1.78E-06 | 3.20E-03 |
| JUN | SLC2A4 | 17p13.1 | -0.509 | 1.99E-06 | 3.26E-03 |
| JUN | FADS6 | 17q25.1 | -0.506 | 2.30E-06 | 3.35E-03 |
| JUN | COLGALT1 | 19p13.11 | 0.505 | 2.38E-06 | 3.35E-03 |
| JUN | MAP7D1 | 1p34.3 | 0.497 | 3.74E-06 | 4.92E-03 |
| JUN | KCND2 | 7q31.31 | 0.491 | 4.90E-06 | 6.04E-03 |
| JUN | SBK1 | 16p12.1 | -0.484 | 7.28E-06 | 8.44E-03 |
| JUN | CCR4 | 3p22.3 | 0.481 | 8.44E-06 | 9.24E-03 |
| JUN | COL5A2 | 2q32.2 | 0.479 | 9.29E-06 | 9.64E-03 |
| JUN | ICOSLG | 21q22.3 | 0.474 | 1.14E-05 | 0.0113 |
| NFKB1 | ADH5 | 4q23 | 0.656 | 7.00E-11 | 5.82E-07 |
| NFKB1 | METTL14 | 4q26 | 0.654 | 8.62E-11 | 5.82E-07 |
| NFKB1 | PHPT1 | 9q34.3 | -0.653 | 8.86E-11 | 5.82E-07 |
| NFKB1 | SMAD1 | 4q31.21 | 0.648 | 1.40E-10 | 6.89E-07 |
| NFKB1 | PA2G4 | 12q13.2 | -0.643 | 2.12E-10 | 7.33E-07 |
| NFKB1 | JAK1 | 1p31.3 | 0.643 | 2.23E-10 | 7.33E-07 |
| NFKB1 | BMP2K | 4q21.21 | 0.638 | 3.22E-10 | 9.06E-07 |
| NFKB1 | ELF1 | 13q14.11 | 0.622 | 1.19E-09 | 2.63E-06 |
| NFKB1 | NEK1 | 4q33 | 0.622 | 1.20E-09 | 2.63E-06 |
| NFKB1 | CAB39 | 2q37.1 | 0.61 | 3.15E-09 | 5.38E-06 |
| NFKB1 | MANBA | 4q24 | 0.609 | 3.26E-09 | 5.38E-06 |
| NFKB1 | AKAP13 | 15q25.3 | 0.608 | 3.47E-09 | 5.38E-06 |
| NFKB1 | AKAP2 | 9q31.3 | 0.608 | 3.55E-09 | 5.38E-06 |
| NFKB1 | SEC24D | 4q26 | 0.604 | 4.71E-09 | 6.63E-06 |
| NFKB1 | GADD45GIP1 | 19p13.13 | -0.602 | 5.53E-09 | 7.27E-06 |
| NFKB1 | PTPRM | 18p11.23 | 0.6 | 6.37E-09 | 7.35E-06 |
| NFKB1 | ZXDA | Xp11.21 | 0.6 | 6.44E-09 | 7.35E-06 |
| NFKB1 | CLCN3 | 4q33 | 0.599 | 6.71E-09 | 7.35E-06 |
| NFKB1 | DDA1 | 19p13.11 | -0.596 | 8.30E-09 | 8.61E-06 |
| NFKB1 | FAM13A | 4q22.1 | 0.594 | 1.01E-08 | 9.98E-06 |
| CASP3 | LYRM1 | 16p12.3 | -0.598 | 7.26E-09 | 1.43E-04 |
| CASP3 | DLX1 | 2q31.1 | 0.569 | 5.42E-08 | 5.34E-04 |
| CASP3 | IRF2 | 4q35.1 | 0.548 | 2.10E-07 | 1.38E-03 |
| CASP3 | OSTC | 4q25 | 0.541 | 3.11E-07 | 1.53E-03 |
| CASP3 | DLX2 | 2q31.1 | 0.532 | 5.49E-07 | 1.56E-03 |
| CASP3 | SLC27A3 | 1q21.3 | 0.532 | 5.53E-07 | 1.56E-03 |
| CASP3 | C4ORF46 | 4q32.1 | 0.531 | 5.55E-07 | 1.56E-03 |
| CASP3 | CENPU | 4q35.1 | 0.523 | 8.92E-07 | 2.20E-03 |
| CASP3 | CHIC2 | 4q12 | 0.52 | 1.07E-06 | 2.22E-03 |
| CASP3 | RCE1 | 11q13.2 | 0.519 | 1.13E-06 | 2.22E-03 |
| CASP3 | EIF4E2 | 2q37.1 | 0.516 | 1.34E-06 | 2.27E-03 |
| CASP3 | FRG1 | 4q35.2 | 0.515 | 1.38E-06 | 2.27E-03 |
| CASP3 | MFSD10 | 4p16.3 | 0.513 | 1.55E-06 | 2.34E-03 |
| CASP3 | HOXC11 | 12q13.13 | 0.508 | 2.06E-06 | 2.90E-03 |
| CASP3 | FAM186B | 12q13.12 | -0.497 | 3.65E-06 | 4.55E-03 |
| CASP3 | TANGO2 | 22q11.21 | -0.497 | 3.70E-06 | 4.55E-03 |
| CASP3 | TNFAIP1 | 17q11.2 | 0.491 | 5.05E-06 | 5.85E-03 |
| CASP3 | AIFM1 | Xq26.1 | -0.488 | 5.88E-06 | 6.05E-03 |
| CASP3 | CBX2 | 17q25.3 | 0.485 | 6.67E-06 | 6.05E-03 |
| CASP3 | CACNB1 | 17q12 | 0.485 | 6.79E-06 | 6.05E-03 |
| PARP1 | GPATCH4 | 1q22-q23.1 | 0.74 | 1.03E-14 | 2.02E-10 |
| PARP1 | HAT1 | 2q31.1 | 0.707 | 4.86E-13 | 4.79E-09 |
| PARP1 | PDIA6 | 2p25.1 | 0.7 | 1.03E-12 | 5.36E-09 |
| PARP1 | HEATR1 | 1q43 | 0.699 | 1.09E-12 | 5.36E-09 |
| PARP1 | ILF2 | 1q21.3 | 0.697 | 1.37E-12 | 5.42E-09 |
| PARP1 | AGFG1 | 2q36.3 | 0.695 | 1.69E-12 | 5.44E-09 |
| PARP1 | ISG20L2 | 1q23.1 | 0.693 | 1.98E-12 | 5.44E-09 |
| PARP1 | SSRP1 | 11q12.1 | 0.692 | 2.35E-12 | 5.44E-09 |
| PARP1 | NBAS | 2p24.3 | 0.691 | 2.48E-12 | 5.44E-09 |
| PARP1 | CNOT9 | 2q35 | 0.685 | 4.61E-12 | 9.09E-09 |
| PARP1 | DHX9 | 1q25.3 | 0.684 | 5.31E-12 | 9.51E-09 |
| PARP1 | ATF6 | 1q23.3 | 0.683 | 5.82E-12 | 9.57E-09 |
| PARP1 | ZNF687 | 1q21.3 | 0.678 | 9.63E-12 | 1.46E-08 |
| PARP1 | ADAR | 1q21.3 | 0.673 | 1.55E-11 | 2.18E-08 |
| PARP1 | ANAPC1 | 2q13 | 0.671 | 1.76E-11 | 2.31E-08 |
| PARP1 | SEPTIN10 | 2q13 | 0.666 | 2.80E-11 | 3.08E-08 |
| PARP1 | SMARCC1 | 3p21.31 | 0.666 | 2.80E-11 | 3.08E-08 |
| PARP1 | GTF3C3 | 2q33.1 | 0.666 | 2.81E-11 | 3.08E-08 |
| PARP1 | GPN1 | 2p23.3 | 0.665 | 3.25E-11 | 3.37E-08 |
| PARP1 | CKS1B | 1q21.3 | 0.662 | 4.21E-11 | 4.15E-08 |
| TP53 | C5ORF49 | 5p15.31 | 0.543 | 2.80E-07 | 4.98E-03 |
| TP53 | PPCS | 1p34.2 | -0.533 | 5.05E-07 | 4.98E-03 |
| TP53 | KAT2B | 3p24.3 | -0.51 | 1.86E-06 | 0.0104 |
| TP53 | RAB10 | 2p23.3 | -0.508 | 2.10E-06 | 0.0104 |
| TP53 | STX7 | 6q23.2 | -0.496 | 3.84E-06 | 0.0128 |
| TP53 | UGP2 | 2p15 | -0.496 | 3.91E-06 | 0.0128 |
| TP53 | ITSN2 | 2p23.3 | -0.487 | 5.99E-06 | 0.0145 |
| TP53 | MPG | 16p13.3 | 0.486 | 6.62E-06 | 0.0145 |
| TP53 | ADIPOR1 | 1q32.1 | -0.484 | 7.28E-06 | 0.0145 |
| TP53 | FHOD1 | 16q22.1 | 0.482 | 8.00E-06 | 0.0145 |
| TP53 | RRAGD | 6q15 | -0.482 | 8.09E-06 | 0.0145 |
| TP53 | PPP1CB | 2p23.2 | -0.478 | 9.79E-06 | 0.0149 |
| TP53 | PRR7 | 5q35.3 | 0.478 | 9.83E-06 | 0.0149 |
| TP53 | OSTM1 | 6q21 | -0.471 | 1.32E-05 | 0.0186 |
| TP53 | SETD4 | 21q22.12 | 0.469 | 1.46E-05 | 0.0188 |
| TP53 | SEPTIN10 | 2q13 | -0.467 | 1.62E-05 | 0.0188 |
| TP53 | TMEM30A | 6q14.1 | -0.466 | 1.69E-05 | 0.0188 |
| TP53 | CYP3A7 | 7q22.1 | -0.466 | 1.73E-05 | 0.0188 |
| TP53 | IGF2R | 6q25.3 | -0.464 | 1.88E-05 | 0.0188 |
| TP53 | TOB2 | 22q13.2 | 0.463 | 1.97E-05 | 0.0188 |
| ACC: Adrenocortical carcinoma | | | | | |

| Table S6. Progression marker genes of LGG and ACC | | | | | | | |
| --- | --- | --- | --- | --- | --- | --- | --- |
| Cancers | Gene name | Gene ID | Base Mean | log2 Fold Change | lfcSE | P-value | Padj-value |
| LGG | H3-5 | ENSG00000188375 | 39.876 | 2.359 | 0.066 | 2.262E-283 | 2.291E-281 |
| H2AC19 | ENSG00000272196 | 2.678 | 5.566 | 0.156 | 2.515E-280 | 2.483E-278 |
| RPS27AP5 | ENSG00000231767 | 87.221 | 2.774 | 0.079 | 2.863E-269 | 2.637E-267 |
| SETSIP | ENSG00000230667 | 9.460 | 2.260 | 0.066 | 5.908E-256 | 4.918E-254 |
| H2AC18 | ENSG00000203812 | 2.993 | 5.204 | 0.157 | 3.498E-242 | 2.605E-240 |
| SAMD8 | ENSG00000156671 | 5802.516 | -1.397 | 0.043 | 9.419E-236 | 6.766E-234 |
| PABPC3 | ENSG00000151846 | 57.911 | 2.247 | 0.069 | 4.686E-232 | 3.251E-230 |
| ATP5MGL | ENSG00000249222 | 3.756 | 3.092 | 0.095 | 3.116E-231 | 2.149E-229 |
| LYPLA1 | ENSG00000120992 | 2140.353 | 1.590 | 0.050 | 4.887E-220 | 3.122E-218 |
| H4C15 | ENSG00000270276 | 2.103 | 4.429 | 0.140 | 2.768E-219 | 1.756E-217 |
| TARS3 | ENSG00000185418 | 1607.207 | -1.364 | 0.044 | 1.337E-215 | 8.258E-214 |
| TUBA1C | ENSG00000167553 | 2281.933 | 2.952 | 0.095 | 5.143E-211 | 3.083E-209 |
| PRLHR | ENSG00000119973 | 910.368 | -6.095 | 0.197 | 5.227E-211 | 3.129E-209 |
| TNRC6C | ENSG00000078687 | 3305.255 | -1.438 | 0.047 | 2.339E-208 | 1.371E-206 |
| RHAG | ENSG00000112077 | 1.871 | 4.538 | 0.148 | 3.567E-206 | 2.067E-204 |
| UQCRHL | ENSG00000233954 | 269.342 | 1.904 | 0.062 | 3.892E-206 | 2.252E-204 |
| SLAMF9 | ENSG00000162723 | 23.624 | 3.938 | 0.129 | 1.989E-204 | 1.143E-202 |
| AC011005.1 | ENSG00000230626 | 28.433 | 2.174 | 0.071 | 1.424E-203 | 8.099E-202 |
| ZMYND11 | ENSG00000015171 | 7726.638 | -1.365 | 0.045 | 1.557E-203 | 8.845E-202 |
| RAP1B | ENSG00000127314 | 1957.282 | 1.429 | 0.048 | 8.523E-195 | 4.574E-193 |
| PPM1L | ENSG00000163590 | 4217.108 | -1.913 | 0.065 | 3.607E-193 | 1.916E-191 |
| FRY | ENSG00000073910 | 4283.266 | -1.829 | 0.062 | 4.904E-190 | 2.542E-188 |
| FAM13C | ENSG00000148541 | 1684.556 | -2.092 | 0.071 | 1.241E-189 | 6.405E-188 |
| FRA10AC1 | ENSG00000148690 | 1528.781 | -1.442 | 0.049 | 3.398E-189 | 1.744E-187 |
| ZNF638 | ENSG00000075292 | 5494.959 | -0.901 | 0.031 | 4.854E-185 | 2.435E-183 |
| CCSER2 | ENSG00000107771 | 4997.750 | -1.420 | 0.049 | 9.024E-185 | 4.517E-183 |
| OSTC | ENSG00000198856 | 1985.261 | 1.516 | 0.052 | 3.612E-184 | 1.798E-182 |
| RPEL1 | ENSG00000235376 | 3.723 | 2.380 | 0.082 | 5.048E-183 | 2.476E-181 |
| PRDX4 | ENSG00000123131 | 3511.507 | 1.647 | 0.058 | 9.093E-180 | 4.324E-178 |
| SPTAN1 | ENSG00000197694 | 44251.983 | -1.123 | 0.039 | 2.970E-179 | 1.410E-177 |
| SCAPER | ENSG00000140386 | 1990.936 | -1.239 | 0.043 | 4.787E-179 | 2.265E-177 |
| DST | ENSG00000151914 | 27344.622 | -1.600 | 0.056 | 5.372E-179 | 2.539E-177 |
| IGIP | ENSG00000182700 | 2549.348 | -1.491 | 0.052 | 9.908E-179 | 4.664E-177 |
| TMOD2 | ENSG00000128872 | 12690.488 | -1.751 | 0.062 | 1.246E-177 | 5.822E-176 |
| CTIF | ENSG00000134030 | 5279.061 | -1.410 | 0.050 | 1.675E-177 | 7.815E-176 |
| CSMD3 | ENSG00000164796 | 1709.896 | -3.795 | 0.135 | 2.309E-174 | 1.060E-172 |
| ANKRD26 | ENSG00000107890 | 674.434 | -1.441 | 0.051 | 1.184E-173 | 5.420E-172 |
| DYNC1H1 | ENSG00000197102 | 33628.164 | -1.167 | 0.042 | 1.794E-173 | 8.205E-172 |
| JMY | ENSG00000152409 | 2145.359 | -1.108 | 0.040 | 5.006E-173 | 2.283E-171 |
| LSM12 | ENSG00000161654 | 452.801 | 0.807 | 0.029 | 2.114E-172 | 9.601E-171 |
| PGAM4 | ENSG00000226784 | 9.497 | 2.013 | 0.072 | 2.825E-172 | 1.279E-170 |
| LDHA | ENSG00000134333 | 14625.163 | 2.194 | 0.079 | 9.980E-172 | 4.511E-170 |
| CNIH4 | ENSG00000143771 | 1552.046 | 1.032 | 0.037 | 1.754E-171 | 7.923E-170 |
| PDZD8 | ENSG00000165650 | 3038.950 | -1.442 | 0.052 | 2.825E-170 | 1.265E-168 |
| RGPD5 | ENSG00000015568 | 2.505 | 2.814 | 0.101 | 9.016E-170 | 4.018E-168 |
| MLLT6 | ENSG00000275023 | 9181.195 | -1.022 | 0.037 | 1.447E-169 | 6.429E-168 |
| ALDH5A1 | ENSG00000112294 | 6380.122 | -1.624 | 0.059 | 3.551E-169 | 1.566E-167 |
| UPF2 | ENSG00000151461 | 2053.720 | -1.195 | 0.043 | 1.623E-168 | 7.118E-167 |
| TUB | ENSG00000166402 | 6378.719 | -1.928 | 0.070 | 4.305E-168 | 1.881E-166 |
| LOX | ENSG00000113083 | 1065.967 | 3.633 | 0.132 | 6.919E-168 | 3.011E-166 |
| FCHSD2 | ENSG00000137478 | 6694.098 | -1.455 | 0.053 | 2.291E-166 | 9.867E-165 |
| PLIN2 | ENSG00000147872 | 1775.742 | 2.316 | 0.084 | 3.800E-166 | 1.633E-164 |
| SAA2 | ENSG00000134339 | 164.884 | 6.367 | 0.232 | 5.781E-166 | 2.481E-164 |
| NALCN | ENSG00000102452 | 2432.588 | -2.128 | 0.078 | 8.918E-166 | 3.821E-164 |
| GNAL | ENSG00000141404 | 1423.708 | -2.630 | 0.096 | 2.143E-165 | 9.128E-164 |
| GPR89A | ENSG00000117262 | 210.985 | 0.903 | 0.033 | 4.947E-165 | 2.100E-163 |
| TOM1L2 | ENSG00000175662 | 7855.533 | -1.242 | 0.045 | 1.720E-164 | 7.275E-163 |
| NET1 | ENSG00000173848 | 3296.214 | -1.960 | 0.072 | 1.228E-163 | 5.172E-162 |
| KCNIP3 | ENSG00000115041 | 3712.036 | -2.574 | 0.094 | 1.970E-163 | 8.274E-162 |
| KIFBP | ENSG00000198954 | 3018.463 | -0.968 | 0.036 | 3.306E-163 | 1.385E-161 |
| CSNK2A3 | ENSG00000254598 | 24.771 | 1.726 | 0.063 | 7.239E-163 | 3.023E-161 |
| OGA | ENSG00000198408 | 9536.330 | -1.035 | 0.038 | 7.964E-163 | 3.323E-161 |
| PRELID1 | ENSG00000169230 | 1867.311 | 0.977 | 0.036 | 1.400E-162 | 5.821E-161 |
| ZNF33A | ENSG00000189180 | 1564.017 | -1.087 | 0.040 | 3.713E-162 | 1.535E-160 |
| PPIAL4A | ENSG00000263353 | 2.637 | 2.725 | 0.101 | 1.391E-161 | 5.718E-160 |
| HDAC4 | ENSG00000068024 | 3619.474 | -1.574 | 0.058 | 1.556E-160 | 6.374E-159 |
| ABLIM1 | ENSG00000099204 | 13292.917 | -1.595 | 0.059 | 5.131E-160 | 2.096E-158 |
| MYO18A | ENSG00000196535 | 5482.351 | -1.228 | 0.046 | 1.058E-159 | 4.315E-158 |
| HIPK2 | ENSG00000064393 | 27088.445 | -1.709 | 0.064 | 3.271E-159 | 1.329E-157 |
| FAM171A1 | ENSG00000148468 | 5912.609 | -1.636 | 0.061 | 1.888E-158 | 7.609E-157 |
| TTC3 | ENSG00000182670 | 20959.120 | -1.372 | 0.051 | 4.696E-158 | 1.889E-156 |
| CRY2 | ENSG00000121671 | 4616.579 | -1.684 | 0.063 | 1.427E-157 | 5.710E-156 |
| HPSE2 | ENSG00000172987 | 1173.797 | -4.613 | 0.173 | 3.360E-157 | 1.339E-155 |
| GABBR1 | ENSG00000204681 | 23884.793 | -2.308 | 0.086 | 5.285E-157 | 2.099E-155 |
| CPEB3 | ENSG00000107864 | 988.422 | -2.169 | 0.081 | 1.056E-156 | 4.181E-155 |
| EIF2S3B | ENSG00000180574 | 31.076 | 2.518 | 0.095 | 4.961E-155 | 1.939E-153 |
| INO80D | ENSG00000114933 | 1162.090 | -0.849 | 0.032 | 3.265E-154 | 1.268E-152 |
| RICTOR | ENSG00000164327 | 2897.230 | -1.527 | 0.058 | 4.770E-153 | 1.835E-151 |
| ZBTB47 | ENSG00000114853 | 5860.954 | -1.355 | 0.051 | 6.598E-153 | 2.536E-151 |
| HILPDA | ENSG00000135245 | 1568.480 | 2.364 | 0.090 | 6.387E-152 | 2.435E-150 |
| ACBD5 | ENSG00000107897 | 4923.449 | -1.145 | 0.044 | 1.158E-151 | 4.394E-150 |
| ADAM22 | ENSG00000008277 | 6329.815 | -1.661 | 0.063 | 7.622E-151 | 2.868E-149 |
| VEGFA | ENSG00000112715 | 8830.045 | 3.082 | 0.118 | 9.645E-151 | 3.621E-149 |
| ATP9A | ENSG00000054793 | 18349.887 | -1.651 | 0.063 | 1.439E-150 | 5.385E-149 |
| PI3 | ENSG00000124102 | 332.478 | 6.127 | 0.235 | 4.653E-150 | 1.735E-148 |
| MARCHF8 | ENSG00000165406 | 3873.969 | -1.649 | 0.063 | 7.421E-150 | 2.757E-148 |
| ZCCHC24 | ENSG00000165424 | 13151.317 | -1.458 | 0.056 | 1.970E-149 | 7.289E-148 |
| HERC1 | ENSG00000103657 | 4757.976 | -1.301 | 0.050 | 3.355E-149 | 1.238E-147 |
| HMGN5 | ENSG00000198157 | 1152.962 | -1.706 | 0.066 | 8.805E-149 | 3.240E-147 |
| DGKK | ENSG00000274588 | 292.043 | -4.681 | 0.180 | 1.979E-148 | 7.235E-147 |
| TBL2 | ENSG00000106638 | 2120.152 | 0.904 | 0.035 | 2.198E-148 | 8.032E-147 |
| PURA | ENSG00000185129 | 3893.741 | -1.328 | 0.051 | 4.564E-148 | 1.662E-146 |
| KCNB1 | ENSG00000158445 | 3737.319 | -2.551 | 0.098 | 6.241E-148 | 2.270E-146 |
| PGK1 | ENSG00000102144 | 21003.850 | 1.397 | 0.054 | 3.485E-147 | 1.261E-145 |
| NXT1 | ENSG00000132661 | 850.325 | 1.388 | 0.054 | 4.172E-147 | 1.508E-145 |
| KIF3A | ENSG00000131437 | 3962.807 | -1.484 | 0.058 | 2.714E-146 | 9.773E-145 |
| RABGAP1 | ENSG00000011454 | 6529.397 | -0.932 | 0.036 | 1.391E-145 | 4.992E-144 |
| KAT6B | ENSG00000156650 | 2950.739 | -1.486 | 0.058 | 2.684E-145 | 9.619E-144 |
| EDEM2 | ENSG00000088298 | 1276.861 | 1.136 | 0.044 | 3.805E-145 | 1.362E-143 |
| AMER2 | ENSG00000165566 | 9386.157 | -2.175 | 0.085 | 1.963E-144 | 6.993E-143 |
| ACC | PRSS8 | ENSG00000052344 | 678.157 | -7.306 | 0.922 | 2.251E-15 | 6.349E-11 |
| PTGS2 | ENSG00000073756 | 246.957 | 4.620 | 0.622 | 1.084E-13 | 1.529E-09 |
| SFN | ENSG00000175793 | 24.999 | 3.813 | 0.550 | 4.194E-12 | 3.944E-08 |
| CD5 | ENSG00000110448 | 229.288 | 3.595 | 0.523 | 6.298E-12 | 4.442E-08 |
| HAS1 | ENSG00000105509 | 17.280 | 3.878 | 0.570 | 1.065E-11 | 6.009E-08 |
| ABI3BP | ENSG00000154175 | 1758.172 | -3.937 | 0.609 | 9.978E-11 | 4.692E-07 |
| TRIM54 | ENSG00000138100 | 151.277 | -4.888 | 0.762 | 1.450E-10 | 5.845E-07 |
| NMU | ENSG00000109255 | 19.388 | 3.846 | 0.608 | 2.565E-10 | 8.040E-07 |
| NMNAT2 | ENSG00000157064 | 315.877 | -4.053 | 0.651 | 4.935E-10 | 1.392E-06 |
| CSF3 | ENSG00000108342 | 15.881 | 3.674 | 0.600 | 9.253E-10 | 2.008E-06 |
| DLG2 | ENSG00000150672 | 353.692 | -2.916 | 0.476 | 8.651E-10 | 2.008E-06 |
| B3GALT2 | ENSG00000162630 | 91.011 | -4.283 | 0.697 | 8.070E-10 | 2.008E-06 |
| AIM2 | ENSG00000163568 | 32.275 | 3.753 | 0.617 | 1.206E-09 | 2.268E-06 |
| HS3ST4 | ENSG00000182601 | 184.259 | -5.947 | 0.993 | 2.109E-09 | 3.718E-06 |
| ADH1C | ENSG00000248144 | 190.039 | -4.807 | 0.821 | 4.767E-09 | 7.911E-06 |
| CCNI2 | ENSG00000205089 | 22.156 | 2.514 | 0.432 | 5.996E-09 | 9.095E-06 |
| RORC | ENSG00000143365 | 440.856 | -4.948 | 0.851 | 6.125E-09 | 9.095E-06 |
| SLC40A1 | ENSG00000138449 | 10674.368 | -2.786 | 0.482 | 7.738E-09 | 1.040E-05 |
| STRA6 | ENSG00000137868 | 1164.388 | -4.544 | 0.790 | 8.919E-09 | 1.144E-05 |
| HHATL | ENSG00000010282 | 126.696 | -4.595 | 0.802 | 9.914E-09 | 1.216E-05 |
| CCN5 | ENSG00000064205 | 5738.023 | -2.992 | 0.529 | 1.578E-08 | 1.854E-05 |
| EYA1 | ENSG00000104313 | 14.555 | 3.556 | 0.632 | 1.857E-08 | 2.096E-05 |
| SPNS3 | ENSG00000182557 | 206.202 | -3.373 | 0.603 | 2.190E-08 | 2.377E-05 |
| WNT5B | ENSG00000111186 | 238.085 | -2.878 | 0.515 | 2.350E-08 | 2.456E-05 |
| FOXL1 | ENSG00000176678 | 66.701 | 2.665 | 0.484 | 3.559E-08 | 3.347E-05 |
| RAB17 | ENSG00000124839 | 478.014 | -4.372 | 0.794 | 3.698E-08 | 3.365E-05 |
| SLC27A2 | ENSG00000140284 | 584.478 | -3.742 | 0.681 | 3.950E-08 | 3.482E-05 |
| SLC30A2 | ENSG00000158014 | 839.052 | -3.691 | 0.677 | 5.020E-08 | 4.046E-05 |
| HTR2B | ENSG00000135914 | 432.245 | -3.292 | 0.608 | 6.188E-08 | 4.718E-05 |
| SLC30A3 | ENSG00000115194 | 317.842 | -3.985 | 0.736 | 6.092E-08 | 4.718E-05 |
| LTBP3 | ENSG00000168056 | 6868.687 | -1.255 | 0.232 | 6.440E-08 | 4.781E-05 |
| RFC4 | ENSG00000163918 | 581.902 | 1.002 | 0.186 | 7.344E-08 | 5.313E-05 |
| HSD17B6 | ENSG00000025423 | 1106.811 | -3.830 | 0.721 | 1.077E-07 | 7.237E-05 |
| PEBP4 | ENSG00000134020 | 156.066 | -3.785 | 0.714 | 1.132E-07 | 7.427E-05 |
| LAG3 | ENSG00000089692 | 91.923 | 2.352 | 0.445 | 1.274E-07 | 8.008E-05 |
| PROK1 | ENSG00000143125 | 393.305 | -5.216 | 0.987 | 1.277E-07 | 8.008E-05 |
| CAMK2A | ENSG00000070808 | 42.136 | -4.092 | 0.778 | 1.471E-07 | 9.019E-05 |
| CEMIP | ENSG00000103888 | 54.272 | 1.990 | 0.380 | 1.590E-07 | 9.543E-05 |
| CDIP1 | ENSG00000089486 | 6556.786 | -1.477 | 0.282 | 1.649E-07 | 9.692E-05 |
| ECT2 | ENSG00000114346 | 724.009 | 1.459 | 0.279 | 1.720E-07 | 9.716E-05 |
| FN3K | ENSG00000167363 | 3993.030 | -1.399 | 0.268 | 1.722E-07 | 9.716E-05 |
| SYN2 | ENSG00000157152 | 807.307 | -3.134 | 0.604 | 2.087E-07 | 1.093E-04 |
| TRDN | ENSG00000186439 | 232.669 | -4.665 | 0.899 | 2.092E-07 | 1.093E-04 |
| EIF4EBP3 | ENSG00000243056 | 520.456 | -1.782 | 0.345 | 2.367E-07 | 1.214E-04 |
| REG3G | ENSG00000143954 | 395.930 | -5.783 | 1.120 | 2.424E-07 | 1.221E-04 |
| PDE3A | ENSG00000172572 | 170.917 | 1.864 | 0.362 | 2.544E-07 | 1.259E-04 |
| IQUB | ENSG00000164675 | 71.293 | -2.284 | 0.444 | 2.725E-07 | 1.303E-04 |
| SERPINI2 | ENSG00000114204 | 36.662 | -6.044 | 1.175 | 2.695E-07 | 1.303E-04 |
| FAM25A | ENSG00000188100 | 17.020 | -6.578 | 1.283 | 2.951E-07 | 1.365E-04 |
| SESN1 | ENSG00000080546 | 2171.195 | -1.122 | 0.220 | 3.322E-07 | 1.490E-04 |
| SLC7A4 | ENSG00000099960 | 370.403 | -4.067 | 0.797 | 3.327E-07 | 1.490E-04 |
| ZWILCH | ENSG00000174442 | 396.715 | 0.949 | 0.187 | 3.857E-07 | 1.692E-04 |
| ATPAF2 | ENSG00000171953 | 940.349 | -0.731 | 0.145 | 4.390E-07 | 1.876E-04 |
| ZNF488 | ENSG00000265763 | 20.958 | 2.418 | 0.480 | 4.683E-07 | 1.972E-04 |
| CXCL3 | ENSG00000163734 | 15.558 | 2.990 | 0.597 | 5.598E-07 | 2.322E-04 |
| NET1 | ENSG00000173848 | 643.680 | 1.312 | 0.263 | 5.772E-07 | 2.360E-04 |
| HIF3A | ENSG00000124440 | 1007.444 | -3.106 | 0.622 | 5.983E-07 | 2.411E-04 |
| NDRG4 | ENSG00000103034 | 19384.469 | -2.845 | 0.570 | 6.147E-07 | 2.442E-04 |
| SLC16A10 | ENSG00000112394 | 813.748 | -1.923 | 0.386 | 6.396E-07 | 2.472E-04 |
| RNF39 | ENSG00000204618 | 528.461 | -2.509 | 0.504 | 6.322E-07 | 2.472E-04 |
| MYOM3 | ENSG00000142661 | 179.533 | -3.483 | 0.702 | 6.936E-07 | 2.644E-04 |
| SPTLC3 | ENSG00000172296 | 580.234 | -1.893 | 0.383 | 7.827E-07 | 2.905E-04 |
| H2BC7 | ENSG00000277224 | 5.147 | 2.872 | 0.582 | 8.055E-07 | 2.951E-04 |
| CBLN4 | ENSG00000054803 | 83.592 | -3.351 | 0.682 | 8.873E-07 | 3.056E-04 |
| SSTR1 | ENSG00000139874 | 135.364 | -3.411 | 0.693 | 8.481E-07 | 3.056E-04 |
| FAM178B | ENSG00000168754 | 30.948 | -3.739 | 0.761 | 8.882E-07 | 3.056E-04 |
| STEAP1 | ENSG00000164647 | 154.617 | 2.652 | 0.540 | 9.188E-07 | 3.123E-04 |
| H2BC8 | ENSG00000273802 | 25.369 | 2.769 | 0.565 | 9.389E-07 | 3.149E-04 |
| SEC14L6 | ENSG00000214491 | 75.570 | -3.659 | 0.746 | 9.488E-07 | 3.149E-04 |
| BTD | ENSG00000169814 | 1011.538 | -0.902 | 0.185 | 1.026E-06 | 3.326E-04 |
| COL14A1 | ENSG00000187955 | 6423.335 | -3.092 | 0.633 | 1.016E-06 | 3.326E-04 |
| CKAP2 | ENSG00000136108 | 745.428 | 1.003 | 0.206 | 1.052E-06 | 3.373E-04 |
| MELK | ENSG00000165304 | 375.684 | 1.859 | 0.383 | 1.217E-06 | 3.856E-04 |
| LRRTM3 | ENSG00000198739 | 67.360 | -5.286 | 1.097 | 1.460E-06 | 4.525E-04 |
| SLC20A1 | ENSG00000144136 | 2174.824 | 1.339 | 0.279 | 1.531E-06 | 4.696E-04 |
| USP1 | ENSG00000162607 | 932.657 | 0.877 | 0.183 | 1.634E-06 | 4.752E-04 |
| KCNQ1 | ENSG00000053918 | 3443.741 | -2.097 | 0.437 | 1.575E-06 | 4.752E-04 |
| ERP27 | ENSG00000139055 | 109.001 | -2.574 | 0.537 | 1.621E-06 | 4.752E-04 |
| DNASE1L3 | ENSG00000163687 | 437.188 | -2.707 | 0.564 | 1.600E-06 | 4.752E-04 |
| NCAPD3 | ENSG00000151503 | 766.180 | 0.820 | 0.172 | 1.763E-06 | 5.075E-04 |
| PNLIPRP3 | ENSG00000203837 | 198.591 | -3.834 | 0.804 | 1.869E-06 | 5.325E-04 |
| KCNE5 | ENSG00000176076 | 17.128 | 2.499 | 0.525 | 1.947E-06 | 5.492E-04 |
| TBC1D2 | ENSG00000095383 | 373.469 | 1.216 | 0.256 | 2.057E-06 | 5.746E-04 |
| KDM7A | ENSG00000006459 | 474.754 | 1.149 | 0.243 | 2.206E-06 | 6.102E-04 |
| TP73 | ENSG00000078900 | 72.946 | 2.811 | 0.596 | 2.386E-06 | 6.377E-04 |
| GPER1 | ENSG00000164850 | 887.634 | -2.418 | 0.513 | 2.396E-06 | 6.377E-04 |
| MASP1 | ENSG00000127241 | 423.763 | -2.760 | 0.585 | 2.349E-06 | 6.377E-04 |
| CDCA7 | ENSG00000144354 | 170.179 | 2.538 | 0.541 | 2.666E-06 | 6.900E-04 |
| CA12 | ENSG00000074410 | 315.367 | 2.511 | 0.537 | 2.938E-06 | 7.536E-04 |
| MFAP4 | ENSG00000166482 | 1369.134 | -3.397 | 0.727 | 3.021E-06 | 7.679E-04 |
| POU5F1 | ENSG00000204531 | 9.222 | 1.782 | 0.383 | 3.334E-06 | 8.397E-04 |
| LY96 | ENSG00000154589 | 732.398 | -2.453 | 0.529 | 3.492E-06 | 8.719E-04 |
| C1QTNF8 | ENSG00000184471 | 51.922 | -4.974 | 1.073 | 3.579E-06 | 8.857E-04 |
| ACSF2 | ENSG00000167107 | 4050.212 | -1.298 | 0.281 | 3.873E-06 | 9.500E-04 |
| OAS3 | ENSG00000111331 | 1785.859 | 1.453 | 0.315 | 3.936E-06 | 9.573E-04 |
| UGT1A7 | ENSG00000244122 | 89.275 | -4.468 | 0.969 | 4.037E-06 | 9.734E-04 |
| DHFR | ENSG00000228716 | 499.467 | 1.092 | 0.237 | 4.151E-06 | 9.842E-04 |
| PRLR | ENSG00000113494 | 7550.077 | -2.804 | 0.609 | 4.141E-06 | 9.842E-04 |
| F5 | ENSG00000198734 | 10.547 | 2.067 | 0.450 | 4.282E-06 | 9.983E-04 |
| ACADS | ENSG00000122971 | 3622.207 | -0.978 | 0.213 | 4.277E-06 | 9.983E-04 |

| Table S7. Drugs targeting five hub genes collected from DrugBank database | | | | | |
| --- | --- | --- | --- | --- | --- |
| Genes | ID | Name | Drug Type | Targets | Number |
| JUN | [DB00570](https://www.drugbank.ca/drugs/DB00570) | Vinblastine | Small Molecule | JUN, TUBA1A, TUBB, TUBD1, TUBE1, TUBG1 | 6 |
| [DB00852](https://www.drugbank.ca/drugs/DB00852) | Pseudoephedrine | Small Molecule | ADRA1A, ADRA2A, ADRB1, ADRB2, ATF1, ATF2, ATF3, ATF4, ATF5, ATF6,ATF7, FOS, IL2, JDP2, JUN, NFATC1, SLC6A2, SLC6A3, SLC6A4, TNF | 20 |
| [DB01029](https://www.drugbank.ca/drugs/DB01029) | Irbesartan | Small Molecule | AGTR1, JUN | 2 |
| [DB01169](https://www.drugbank.ca/drugs/DB01169) | Arsenic trioxide | Small Molecule | AKT1, CCND1, CDKN1A, HDAC1, IKBKB, JUN, MAPK1, MAPK3, PML, TXNRD1 | 10 |
| [DB05785](https://www.drugbank.ca/drugs/DB05785) | LGD-1550 | Small Molecule | JUN, RARA, RARB, RARG | 4 |
| NFKB1 | DB00945 | Acetylsalicylic acid | Small Molecule | AKR1C1, EDNRA, HSPA5, IKBKB, NFKB1, NFKB2, NFKBIA, PRKAA1, PRKAA2, PRKAB1, PRKAB2, PRKAG1, PRKAG2, PRKAG3, PTGS1, PTGS2, RPS6KA3, TP53 | 18 |
| DB01041 | Thalidomide | Small Molecule | CRBN, FGFR2, NFKB1, ORM1, ORM2, PTGS2, TNF | 7 |
| DB01411 | Pranlukast | Small Molecule | CYSLTR1, IL5, MUC2, NFKB1, RNASE3, TNF | 6 |
| DB05767 | Andrographolide | Small Molecule | IL1B, IL6, NFKB1, NFKB2, TNF | 5 |
| DB08814 | Triflusal | Small Molecule | NFKB1, NOS2, PDE10A, PTGS1 | 4 |
| DB05487 | Custirsen | Small Molecule | ESR1, NFKB1, NFKB2 | 3 |
| DB05212 | HE3286 | Small Molecule | NFKB1, NFKB2 | 2 |
| DB05451 | P54 | Small Molecule | NFKB1, NFKB2 | 2 |
| DB05464 | NOX-700 | Small Molecule | NFKB1, NFKB2 | 2 |
| DB05471 | SGN-30 | Biotech | NFKB1, NFKB2 | 2 |
| CASP3 | DB01017 | Minocycline | Small Molecule | ALOX5, CASP1, CASP3, CYCS, IL1B, MMP9, VEGFA | 7 |
| DB03124 | 5-[4-(1-Carboxymethyl-2-Oxo-Propylcarbamoyl)-Benzylsulfamoyl]-2-Hydroxy-Benzoic Acid | Small Molecule | CASP3 | 1 |
| DB05408 | Emricasan | Small Molecule | CASP1, CASP3, CASP7 | 3 |
| DB06862 | 2-HYDROXY-5-(2-MERCAPTO-ETHYLSULFAMOYL)-BENZOIC ACID | Small Molecule | CASP3 | 1 |
| DB07696 | methyl (3S)-3-[(tert-butoxycarbonyl)amino]-4-oxopentanoate | Small Molecule | CASP3 | 1 |
| DB08213 | 1-METHYL-5-(2-PHENOXYMETHYL-PYRROLIDINE-1-SULFONYL)-1H-INDOLE-2,3-DIONE | Small Molecule | CASP3 | 1 |
| DB08229 | [N-(3-DIBENZYLCARBAMOYL-OXIRANECARBONYL)-HYDRAZINO]-ACETIC ACID | Small Molecule | CASP3 | 1 |
| DB08251 | 4-[5-(2-CARBOXY-1-FORMYL-ETHYLCARBAMOYL)-PYRIDIN-3-YL]-BENZOIC ACID | Small Molecule | CASP3 | 1 |
| DB08497 | (1S)-2-oxo-1-phenyl-2-[(1,3,4-trioxo-1,2,3,4-tetrahydroisoquinolin-5-yl)amino]ethyl acetate | Small Molecule | CASP3 | 1 |
| DB08498 | (1S)-1-(3-chlorophenyl)-2-oxo-2-[(1,3,4-trioxo-1,2,3,4-tetrahydroisoquinolin-5-yl)amino]ethyl acetate | Small Molecule | CASP3 | 1 |
| PARP1 | [DB00277](https://www.drugbank.ca/drugs/DB00277) | Theophylline | Small Molecule | ADORA1, ADORA2A, ADORA2B, CPNE1, HDAC2, HM13, NOMO1, PARP1, PDE3A,PDE4A, PDE4B,PDE5A, RIC3, TTL3 | 14 |
| [DB01593](https://www.drugbank.ca/drugs/DB01593) | Zinc | Small Molecule | A1BG, A2M, AGT, AHSG, ALDOA, APCS, APLP1, APLP2, APOA1, APOA2, APO, A1BG,A2M,AGT,,AHSG,ALDOA, APCS, APLP1, APLP2, APOA1,APOA2, APOA4,APOBR,APOE, APOL1, APP, ASPA, BDKRB1,BRCC3,C1QB,C1QC, C1R,C1S,C3,C4B,C4BPA, C4BPB, C5, C8A, C8B, C8G,CCS, CFB, CFH, CFI, CLU,, CP, CPN1,CPN2, DAND5, DCD, DSP,EEF1A1,ENO1, ESR1,F12, F13B,F2,FCN3, FGA, FN1,GAPDHS,GLRA1, GSN, HBA1, HBB, HDAC1, HDAC4,HDAC8, HPR, HRNR IGFALS,IL3,INS, ITIH1, ITIH2, ITIH3,ITIH4,JCHAIN, JUP,KLKB1,KNG1, KRT1, KRT10,KRT14,KRT16, KRT2, KRT5,KRT6A, KRT9, MDM2, MGMT, MMP9, MPG, MT1A, MT2A, M | 119 |
| [DB02498](https://www.drugbank.ca/drugs/DB02498) | Carba-Nicotinamide-Adenine-Dinucleotide | Small Molecule | PARP1 | 1 |
| [DB02690](https://www.drugbank.ca/drugs/DB02690) | NU1025 | Small Molecule | PARP1 | 1 |
| [DB02701](https://www.drugbank.ca/drugs/DB02701) | Nicotinamide | Small Molecule | BST1, LDHA, PARP1, SIRT5 | 4 |
| [DB03072](https://www.drugbank.ca/drugs/DB03072) | 2-{3-[4-(4-Fluorophenyl)-3,6-Dihydro-1(2h)-Pyridinyl]Propyl}-8-Methyl-4(3h)-Quinazolinone | Small Molecule | PARP1 | 1 |
| [DB03073](https://www.drugbank.ca/drugs/DB03073) | 3-Methoxybenzamide | Small Molecule | PARP1 | 1 |
| [DB03509](https://www.drugbank.ca/drugs/DB03509) | 2-(4-Chlorophenyl)-5-Quinoxalinecarboxamide | Small Molecule | PARP1 | 1 |
| [DB03722](https://www.drugbank.ca/drugs/DB03722) | 3,4-Dihydro-5-Methyl-Isoquinolinone | Small Molecule | PARP1 | 1 |
| [DB04010](https://www.drugbank.ca/drugs/DB04010) | 2-(3'-Methoxyphenyl) Benzimidazole-4-Carboxamide | Small Molecule | PARP1 | 1 |
| [DB07096](https://www.drugbank.ca/drugs/DB07096) | 6-AMINO-BENZO[DE]ISOQUINOLINE-1,3-DIONE | Small Molecule | PARP1 | 1 |
| [DB07232](https://www.drugbank.ca/drugs/DB07232) | Veliparib | Small Molecule | PARP1, PARP2 | 2 |
| [DB07330](https://www.drugbank.ca/drugs/DB07330) | trans-4-(7-carbamoyl-1H-benzimidazol-2-yl)-1-propylpiperidinium | Small Molecule | PARP1 | 1 |
| [DB07787](https://www.drugbank.ca/drugs/DB07787) | 5-FLUORO-1-[4-(4-PHENYL-3,6-DIHYDROPYRIDIN-1(2H)-YL)BUTYL]QUINAZOLINE-2,4(1H,3H)-DIONE | Small Molecule | PARP1 | 1 |
| [DB09074](https://www.drugbank.ca/drugs/DB09074) | Olaparib | Small Molecule | PARP1, PARP2, PARP3 | 3 |
| [DB11793](https://www.drugbank.ca/drugs/DB11793) | Niraparib | Small Molecule | PARP1, PARP2 | 2 |
| [DB12332](https://www.drugbank.ca/drugs/DB12332) | Rucaparib | Small Molecule | PARP1, PARP2, PARP3 | 3 |
| [DB13877](https://www.drugbank.ca/drugs/DB13877) | Iniparib | Small Molecule | PARP1 | 1 |
| TP53 | [DB00945](https://www.drugbank.ca/drugs/DB00945) | Acetylsalicylic acid | Small Molecule | AKR1C1, EDNRA, HSPA5, IKBKB, NFKB1, NFKB2, NFKBIA, PRKAA1, PRKAA2, AKR1C1,EDNRA, HSPA5,IKBKB, NFKB1, NFKB2, NFKBIA, PRKAA1, PRKAA2, PRKAB1, PRKAB2, PRKAG1, PRKAG2, PRKAG3, PTGS1, PTGS2, RPS6KA3, TP53 | 18 |

|  | [DB01593](https://www.drugbank.ca/drugs/DB01593) | Zinc | Small Molecule | A1BG, A2M, AGT, AHSG, ALDOA, APCS, APLP1, APLP2, APOA1, APOA2, APO, A1BG,A2M,AGT,,AHSG,ALDOA, APCS, APLP1, APLP2, APOA1,APOA2, APOA4,APOBR,APOE, APOL1,APP,ASPA, BDKRB1,BRCC3,C1QB,C1QC, C1R,C1S,C3,C4B,C4BPA, C4BPB,C5, C8A, C8B, C8G,CCS, CFB, CFH, CFI, CLU,, CP, CPN1,CPN2, DAND5, DCD, DSP,EEF1A1,ENO1, ESR1,F12, F13B,F2,FCN3, FGA, FN1,GAPDHS,GLRA1, GSN, HBA1, HBB, HDAC1, HDAC4,HDAC8, HPR, HRNR IGFALS,IL3,INS, ITIH1, ITIH2, ITIH3,ITIH4,JCHAIN, JUP,KLKB1,KNG1, KRT1, KRT10,KRT14,KRT16, KRT2, KRT5,KRT6A, KRT9, MDM2, MGMT, MMP9, MPG, MT1A, MT2A, M | 119 |
| --- | --- | --- | --- | --- | --- |
| [DB03347](https://www.drugbank.ca/drugs/DB03347) | Triethyl Phosphate | Small Molecule | TP53 | 1 |
| [DB05404](https://www.drugbank.ca/drugs/DB05404) | AZD 3355 | Small Molecule | TP53 | 1 |
| [DB08363](https://www.drugbank.ca/drugs/DB08363) | 1-(9-ethyl-9H-carbazol-3-yl)-N-methylmethanamine | Small Molecule | TP53 | 1 |

| Table S8. Correlation between JUN expression and typical infiltrating immune cells in 32 TCGA tumors (TIMER database) | | | | | | | | | | | | |
| --- | --- | --- | --- | --- | --- | --- | --- | --- | --- | --- | --- | --- |
| Type | B Cell | | CD4+ T Cell | | CD8+ T Cell | | Dendritic Cell | | Macrophage | | Neutrophil | |
| Cor | P-value | Cor | P-value | Cor | P-value | Cor | P-value | Cor | P-value | Cor | P-value |
| ACC | **0.415** | **<0.001** | 0.113 | 0.340 | 0.244 | 0.037 | **0.486** | **<0.001** | **0.368** | **0.001** | **0.491** | **<0.001** |
| BLCA | -0.030 | 0.572 | **0.145** | **0.005** | **0.163** | **0.002** | **0.152** | **0.004** | **0.141** | **0.007** | **0.203** | **<0.001** |
| BRCA | **-0.108** | **<0.001** | **0.230** | **<0.001** | **0.068** | **0.035** | **0.122** | **<0.001** | **0.088** | **0.006** | **0.093** | **0.004** |
| CESC | -0.096 | 0.111 | 0.058 | 0.334 | -0.083 | 0.173 | 0.084 | 0.163 | **-0.175** | **0.003** | 0.088 | 0.143 |
| CHOL | **0.358** | **0.035** | 0.251 | 0.145 | 0.183 | 0.293 | 0.110 | 0.529 | **0.366** | **0.031** | **0.434** | **0.009** |
| COAD | -0.024 | 0.633 | **0.319** | **<0.001** | 0.011 | 0.831 | **0.127** | **0.011** | 0.035 | 0.482 | **0.085** | **0.088** |
| DLBC | 0.295 | 0.235 | -0.042 | 0.856 | -0.300 | 0.186 | 0.095 | 0.681 | 0.072 | 0.756 | **0.600** | **0.004** |
| ESCA | -0.082 | 0.275 | -0.135 | 0.072 | **0.264** | **<0.001** | **0.330** | **<0.001** | 0.047 | 0.534 | 0.140 | 0.062 |
| GBM | 0.040 | 0.418 | 0.144 | 0.003 | 0.023 | 0.636 | **0.229** | **<0.001** | **0.139** | **0.004** | **0.099** | **0.044** |
| HNSC | 0.013 | 0.775 | **0.164** | **<0.001** | -0.035 | 0.445 | **0.121** | **0.008** | 0.043 | 0.341 | **0.178** | **<0.001** |
| KICH | -0.003 | 0.979 | 0.118 | 0.347 | 0.023 | 0.855 | 0.178 | 0.157 | 0.138 | 0.273 | 0.032 | 0.798 |
| KIRC | 0.022 | 0.644 | **0.250** | **<0.001** | **0.145** | **0.002** | **0.098** | **0.036** | 0.076 | 0.106 | **0.192** | **<0.001** |
| KIRP | **0.127** | **0.042** | **0.141** | **0.024** | 0.043 | 0.493 | **0.336** | **<0.001** | 0.040 | 0.531 | **0.296** | **<0.001** |
| LGG | **0.289** | **<0.001** | **0.398** | **<0.001** | **0.167** | **<0.001** | **0.439** | **<0.001** | **0.486** | **<0.001** | **0.509** | **<0.001** |
| LIHC | 0.020 | 0.713 | **0.268** | **<0.001** | 0.043 | 0.430 | **0.174** | **0.001** | **0.262** | **<0.001** | **0.344** | **<0.001** |
| LUAD | **0.202** | **<0.001** | **0.392** | **<0.001** | 0.059 | 0.192 | **0.255** | **<0.001** | **0.164** | **<0.001** | **0.186** | **<0.001** |
| LUSC | -0.029 | 0.533 | **0.310** | **<0.001** | -0.059 | 0.203 | 0.080 | 0.081 | **0.185** | **<0.001** | **0.157** | **0.001** |
| MESO | -0.001 | 0.995 | -0.099 | 0.370 | **0.245** | **0.025** | 0.059 | 0.593 | 0.113 | 0.307 | 0.192 | 0.081 |
| OV | **-0.129** | **0.005** | -0.065 | 0.157 | -0.077 | 0.091 | **-0.106** | **0.020** | -0.047 | 0.307 | -0.034 | 0.451 |
| PAAD | **0.176** | **0.021** | **0.290** | **<0.001** | **0.272** | **<0.001** | **0.260** | **0.001** | **0.293** | **<0.001** | **0.387** | **<0.001** |
| PCPG | 0.105 | 0.179 | 0.128 | 0.100 | **0.291** | **<0.001** | **0.167** | **0.031** | **0.160** | **0.039** | **0.555** | **<0.001** |
| PRAD | **0.201** | **<0.001** | **0.146** | **0.003** | **0.369** | **<0.001** | **0.365** | **<0.001** | **0.164** | **0.001** | **0.452** | **<0.001** |
| READ | **0.254** | **0.003** | **0.304** | **<0.001** | 0.157 | 0.066 | **0.204** | **0.016** | **0.271** | **0.001** | -0.048 | 0.574 |
| SARC | 0.038 | 0.554 | -0.094 | 0.145 | 0.059 | 0.366 | -0.061 | 0.347 | 0.072 | 0.275 | **0.147** | **0.022** |
| SKCM | 0.078 | 0.099 | **0.202** | **<0.001** | **0.104** | **0.030** | 0.087 | 0.066 | **0.280** | **<0.001** | **0.184** | **<0.001** |
| STAD | **0.244** | **<0.001** | **0.231** | **<0.001** | -0.040 | 0.443 | -0.030 | 0.564 | **0.157** | **0.002** | -0.086 | 0.098 |
| TGCT | **-0.356** | **<0.001** | 0.147 | 0.076 | **-0.311** | **<0.001** | -0.133 | 0.110 | **0.244** | **0.003** | 0.161 | 0.051 |
| THCA | **0.104** | **0.022** | **0.181** | **<0.001** | **-0.178** | **<0.001** | -0.003 | 0.953 | 0.084 | 0.065 | 0.060 | 0.185 |
| THYM | **-0.196** | **0.037** | **-0.451** | **<0.001** | **-0.279** | **0.003** | **-0.432** | **<0.001** | **-0.314** | **0.001** | **0.341** | **<0.001** |
| UCEC | **-0.156** | **0.008** | -0.046 | 0.432 | -0.048 | 0.420 | 0.009 | 0.877 | **-0.187** | **0.001** | 0.091 | 0.119 |
| UCS | 0.070 | 0.620 | -0.005 | 0.974 | 0.152 | 0.277 | 0.202 | 0.146 | **0.328** | **0.016** | **0.325** | **0.018** |
| UVM | 0.030 | 0.795 | **0.340** | **0.003** | -0.151 | 0.190 | **-0.236** | **0.043** | **0.263** | **0.035** | 0.212 | 0.064 |
| Parameters with P-value<0.05 were highlighted in bold. | | | | | | | | | | | | |

| Table S9. Correlation between NFKB1 expression and typical infiltrating immune cells in 32 TCGA tumors (TIMER database) | | | | | | | | | | | | |
| --- | --- | --- | --- | --- | --- | --- | --- | --- | --- | --- | --- | --- |
| Type | B Cell | | CD4+ T Cell | | CD8+ T Cell | | Dendritic Cell | | Macrophage | | Neutrophil | |
| Cor | P-value | Cor | P-value | Cor | P-value | Cor | P-value | Cor | P-value | Cor | P-value |
| ACC | **0.565** | **<0001** | **0.240** | **0.041** | **0.465** | **<0001** | **0.419** | **<0001** | **0.437** | **<0001** | **0.452** | **<0001** |
| BLCA | **0.144** | **0.006** | **0.138** | **0.008** | **0.329** | **<0001** | **0.365** | **<0001** | 0.046 | 0.380 | **0.517** | **<0001** |
| BRCA | **0.183** | **<0001** | **0.289** | **<0001** | **0.325** | **<0001** | **0.294** | **<0001** | **0.286** | **<0001** | **0.416** | **<0001** |
| CESC | 0.088 | 0.143 | **0.214** | **<0001** | **0.234** | **<0001** | **0.354** | **<0001** | **-0.185** | **0.002** | **0.397** | **<0001** |
| CHOL | **0.421** | **0.012** | 0.325 | 0.848 | **0.362** | **0.032** | 0.326 | 0.056 | **0.366** | **0.031** | **0.339** | **0.046** |
| COAD | **0.237** | **<0001** | **0.437** | **<0001** | **0.357** | **<0001** | **0.557** | **<0001** | **0.446** | **<0001** | **0.521** | **<0001** |
| DLBC | 0.438 | 0.069 | **-0.069** | **<0001** | -0.259 | 0.256 | 0.234 | 0.308 | -0.058 | 0.803 | **0.514** | **0.017** |
| ESCA | **0.205** | **<0001** | 0.074 | 0.057 | 0.061 | 0.417 | **0.171** | **0.022** | -0.006 | 0.938 | **0.196** | **0.008** |
| GBM | -0.010 | 0.832 | **0.135** | **<0001** | **-0.193** | **<0001** | **0.499** | **<0001** | 0.065 | 0.181 | **0.258** | **<0001** |
| HNSC | **0.157** | **0.001** | 0.409 | 0.766 | **0.182** | **<0001** | **0.375** | **<0001** | **0.177** | **<0001** | **0.367** | **<0001** |
| KICH | **0.607** | **<0001** | -0.355 | 0.324 | **0.600** | **<0001** | **0.487** | **<0001** | **0.472** | **<0001** | -0.008 | 0.951 |
| KIRC | **0.290** | **<0001** | **0.463** | **0.006** | **0.338** | **<0001** | **0.468** | **<0001** | **0.475** | **<0001** | **0.580** | **<0001** |
| KIRP | 0.056 | 0.371 | **0.091** | **<0001** | 0.029 | 0.648 | **0.313** | **<0001** | **0.192** | **0.002** | **0.276** | **<0001** |
| LGG | **0.460** | **<0001** | **0.546** | **0.004** | **0.278** | **<0001** | **0.553** | **<0001** | **0.616** | **<0001** | **0.548** | **<0001** |
| LIHC | **0.346** | **<0001** | **0.471** | **<0001** | **0.281** | **<0001** | **0.495** | **<0001** | **0.429** | **<0001** | **0.531** | **<0001** |
| LUAD | **0.249** | **<0001** | 0.452 | 0.145 | **0.271** | **<0001** | **0.533** | **<0001** | **0.298** | **<0001** | **0.501** | **<0001** |
| LUSC | 0.040 | 0.382 | **0.303** | **<0001** | **0.162** | **<0001** | **0.325** | **<0001** | **0.170** | **<0001** | **0.449** | **<0001** |
| MESO | **0.381** | **<0001** | **-0.146** | **<0001** | **0.288** | **0.008** | **0.342** | **0.001** | 0.100 | 0.364 | **0.291** | **0.007** |
| OV | **0.205** | **<0001** | **0.183** | **<0001** | **0.208** | **<0001** | **0.380** | **<0001** | 0.064 | 0.159 | **0.377** | **<0001** |
| PAAD | **0.459** | **<0001** | **0.026** | **<0001** | **0.605** | **<0001** | **0.603** | **<0001** | **0.486** | **<0001** | **0.561** | **<0001** |
| PCPG | **0.260** | **0.001** | 0.249 | 0.184 | **0.264** | **0.001** | **0.363** | **<0001** | **0.405** | **<0001** | **0.604** | **<0001** |
| PRAD | **0.458** | **<0001** | **0.253** | **<0001** | **0.630** | **<0001** | **0.579** | **<0001** | **0.479** | **<0001** | **0.608** | **<0001** |
| READ | **0.229** | **0.007** | 0.173 | 0.732 | **0.333** | **<0001** | **0.275** | **0.001** | **0.178** | **0.036** | **0.253** | **0.003** |
| SARC | 0.111 | 0.088 | **-0.048** | **0.001** | **0.213** | **0.001** | 0.052 | 0.421 | 0.070 | 0.282 | **0.359** | **<0001** |
| SKCM | **0.236** | **<0001** | **0.221** | **<0001** | **0.378** | **<0001** | **0.359** | **<0001** | **0.304** | **<0001** | **0.545** | **<0001** |
| STAD | -0.003 | 0.959 | **0.155** | **0.042** | **0.250** | **<0001** | **0.325** | **<0001** | 0.094 | 0.070 | **0.304** | **<0001** |
| TGCT | 0.039 | 0.638 | 0.378 | 0.464 | -0.028 | 0.740 | **0.337** | **<0001** | **0.298** | **<0001** | **0.444** | **<0001** |
| THCA | **0.686** | **<0001** | **0.679** | **<0001** | **-0.314** | **<0001** | **0.484** | **<0001** | **0.696** | **<0001** | **0.537** | **<0001** |
| THYM | -0.023 | 0.809 | **-0.344** | **0.003** | 0.005 | 0.959 | **-0.252** | **0.007** | -0.016 | 0.867 | **0.412** | **<0001** |
| UCEC | 0.087 | 0.142 | **0.038** | **<0001** | **0.209** | **<0001** | **0.344** | **<0001** | 0.092 | 0.117 | **0.458** | **<0001** |
| UCS | 0.064 | 0.649 | **-0.001** | **<0001** | 0.176 | 0.206 | **0.441** | **0.001** | 0.103 | 0.462 | **0.343** | **0.012** |
| UVM | **0.292** | **0.011** | **-0.210** | **<0001** | 0.217 | 0.058 | 0.073 | 0.536 | -0.168 | 0.185 | 0.045 | 0.695 |
| Parameters with P-value<0.05 were highlighted in bold. | | | | | | | | | | | | |

| Table S10. Correlation between CASP3 expression and typical infiltrating immune cells in 32 TCGA tumors (TIMER database) | | | | | | | | | | | | |
| --- | --- | --- | --- | --- | --- | --- | --- | --- | --- | --- | --- | --- |
| Type | B Cell | | CD4+ T Cell | | CD8+ T Cell | | Dendritic Cell | | Macrophage | | Neutrophil | |
| Cor | P-value | Cor | P-value | Cor | P-value | Cor | P-value | Cor | P-value | Cor | P-value |
| ACC | **0.378** | **0.001** | **0.258** | **0.028** | 0.099 | 0.406 | **0.235** | **0.045** | **0.261** | **0.025** | **0.298** | **0.010** |
| BLCA | **0.218** | **<0.001** | -0.043 | 0.408 | **0.133** | **0.011** | -0.016 | 0.760 | **0.129** | **0.014** | **0.164** | **0.002** |
| BRCA | **0.208** | **<0.001** | **0.144** | **<0.001** | **0.352** | **<0.001** | **0.234** | **<0.001** | **0.243** | **<0.001** | **0.299** | **<0.001** |
| CESC | 0.064 | 0.286 | **0.181** | **0.003** | **0.122** | **0.044** | 0.076 | 0.209 | -0.083 | 0.170 | **0.175** | **0.003** |
| CHOL | **0.415** | **0.013** | 0.068 | 0.696 | 0.103 | 0.555 | 0.165 | 0.344 | 0.130 | 0.458 | 0.211 | 0.225 |
| COAD | **0.296** | **<0.001** | 0.025 | 0.613 | **0.516** | **<0.001** | **0.368** | **<0.001** | **0.237** | **<0.001** | **0.371** | **<0.001** |
| DLBC | 0.408 | 0.093 | -0.049 | 0.832 | 0.058 | 0.802 | 0.417 | 0.060 | -0.432 | 0.051 | 0.311 | 0.171 |
| ESCA | **0.321** | **<0.001** | 0.065 | 0.389 | 0.024 | 0.749 | -0.086 | 0.251 | 0.063 | 0.399 | 0.007 | 0.921 |
| GBM | 0.081 | 0.100 | -0.050 | 0.305 | **0.109** | **0.027** | **0.193** | **<0.001** | 0.084 | 0.087 | **0.155** | **0.001** |
| HNSC | **0.196** | **<0.001** | **0.372** | **<0.001** | **0.241** | **<0.001** | **0.332** | **<0.001** | **0.224** | **<0.001** | **0.300** | | **<0.001** | | --- | |
| KICH | 0.228 | 0.068 | 0.030 | 0.812 | **0.250** | **0.045** | **0.458** | **<0.001** | **0.423** | **<0.001** | -0.002 | 0.988 |
| KIRC | **0.357** | **<0.001** | **0.354** | **<0.001** | **0.366** | **<0.001** | **0.518** | **<0.001** | **0.497** | **<0.001** | **0.568** | **<0.001** |
| KIRP | 0.118 | 0.060 | 0.101 | 0.107 | **0.144** | **0.021** | **0.234** | **<0.001** | 0.071 | 0.266 | **0.380** | **<0.001** |
| LGG | **0.364** | **<0.001** | **0.209** | **<0.001** | **0.364** | **<0.001** | **0.331** | **<0.001** | **0.363** | **<0.001** | **0.288** | **<0.001** |
| LIHC | **0.344** | **<0.001** | **0.411** | **<0.001** | **0.316** | **<0.001** | **0.468** | **<0.001** | **0.389** | **<0.001** | **0.411** | **<0.001** |
| LUAD | 0.055 | 0.225 | **0.130** | **0.004** | **0.135** | **0.003** | **0.149** | **0.001** | **0.170** | **<0.001** | **0.261** | **<0.001** |
| LUSC | **0.168** | **<0.001** | 0.008 | 0.855 | **0.180** | **<0.001** | **0.131** | **0.004** | 0.038 | 0.403 | **0.208** | **<0.001** |
| MESO | **0.335** | **0.002** | 0.068 | 0.541 | 0.183 | 0.095 | **0.348** | **0.001** | 0.116 | 0.292 | 0.121 | 0.272 |
| OV | 0.053 | 0.248 | 0.067 | 0.142 | **0.195** | **<0.001** | **0.221** | **<0.001** | **0.292** | **<0.001** | **0.277** | **<0.001** |
| PAAD | **0.366** | **<0.001** | -0.018 | 0.813 | **0.400** | **<0.001** | **0.390** | **<0.001** | **0.286** | **<0.001** | **0.373** | **<0.001** |
| PCPG | **0.266** | **0.001** | 0.099 | 0.202 | -0.033 | 0.675 | **0.256** | **0.001** | 0.137 | 0.078 | **0.292** | **<0.001** |
| PRAD | **0.479** | **<0.001** | **0.127** | **0.010** | **0.445** | **<0.001** | **0.397** | **<0.001** | **0.314** | **<0.001** | **0.480** | **<0.001** |
| READ | 0.130 | 0.126 | **-0.252** | **0.003** | **0.543** | **<0.001** | 0.001 | 0.992 | 0.107 | 0.210 | **0.293** | **<0.001** |
| SARC | **0.134** | **0.039** | -0.128 | 0.048 | **0.264** | **<0.001** | 0.053 | 0.415 | 0.078 | 0.236 | **0.182** | **0.004** |
| SKCM | **0.166** | **<0.001** | **0.200** | **<0.001** | **0.419** | **<0.001** | **0.337** | **<0.001** | **0.291** | **<0.001** | **0.573** | **<0.001** |
| STAD | -0.051 | 0.328 | **-0.109** | **0.037** | -0.095 | 0.067 | -0.045 | 0.383 | **-0.148** | **0.004** | 0.002 | 0.962 |
| TGCT | 0.035 | 0.672 | -0.065 | 0.436 | 0.108 | 0.193 | **0.202** | **0.014** | -0.041 | 0.621 | 0.039 | 0.638 |
| THCA | **0.739** | **<0.001** | **0.524** | **<0.001** | 0.012 | 0.787 | **0.648** | **<0.001** | **0.634** | **<0.001** | **0.603** | **<0.001** |
| THYM | **0.544** | **<0.001** | **0.218** | **0.022** | **0.217** | **0.020** | **0.379** | **<0.001** | **0.288** | **0.002** | 0.111 | 0.238 |
| UCEC | -0.099 | 0.094 | **-0.170** | **0.004** | **0.383** | **<0.001** | **0.211** | **<0.001** | -0.047 | 0.424 | 0.389 | <0.001 |
| UCS | 0.089 | 0.526 | -0.171 | 0.221 | 0.088 | 0.531 | 0.227 | 0.102 | 0.100 | 0.475 | 0.219 | 0.116 |
| UVM | **0.355** | **0.002** | **-0.232** | **0.044** | 0.201 | 0.080 | -0.098 | 0.405 | -0.109 | 0.390 | 0.087 | 0.449 |
| Parameters with P-value<0.05 were highlighted in bold. | | | | | | | | | | | | |

| Table S11. Correlation between PARP1 expression and typical infiltrating immune cells in 32 TCGA tumors (TIMER database) | | | | | | | | | | | | |
| --- | --- | --- | --- | --- | --- | --- | --- | --- | --- | --- | --- | --- |
| Type | B Cell | | CD4+ T Cell | | CD8+ T Cell | | Dendritic Cell | | Macrophage | | Neutrophil | |
| Cor | P-value | Cor | P-value | Cor | P-value | Cor | P-value | Cor | P-value | Cor | P-value |
| ACC | **0.548** | **<0.001** | 0.068 | 0.567 | 0.149 | 0.210 | **0.536** | **<0.001** | **0.274** | **0.019** | **0.445** | **<0.001** |
| BLCA | **0.196** | **<0.001** | -0.017 | 0.742 | **0.235** | **<0.001** | **0.176** | **0.001** | **0.265** | **<0.001** | **0.241** | **<0.001** |
| BRCA | **0.181** | **<0.001** | **0.174** | **<0.001** | **0.156** | **<0.001** | **0.185** | **<0.001** | **0.081** | **0.011** | **0.214** | **<0.001** |
| CESC | **0.193** | **0.001** | **0.157** | **0.009** | 0.101 | 0.094 | **0.152** | **0.011** | 0.034 | 0.568 | **0.130** | **0.031** |
| CHOL | 0.310 | 0.069 | **0.339** | **0.046** | 0.049 | 0.780 | 0.205 | 0.239 | 0.085 | 0.629 | 0.153 | 0.381 |
| COAD | **0.150** | **0.002** | **0.395** | **<0.001** | **0.273** | **<0.001** | **0.334** | **<0.001** | **0.348** | **<0.001** | **0.404** | **<0.001** |
| DLBC | 0.201 | 0.425 | -0.015 | 0.947 | **-0.624** | **0.003** | -0.108 | 0.642 | **0.461** | **0.035** | 0.029 | 0.900 |
| ESCA | **0.190** | **0.011** | -0.047 | 0.534 | **-0.166** | **0.026** | **-0.288** | **<0.001** | **0.156** | **0.036** | -0.123 | 0.101 |
| GBM | 0.050 | 0.306 | **0.133** | **0.007** | 0.088 | 0.073 | 0.017 | 0.729 | **0.119** | **0.015** | **0.189** | **<0.001** |
| HNSC | **0.245** | **<0.001** | **0.387** | **<0.001** | **0.190** | **<0.001** | **0.299** | **<0.001** | **0.280** | **<0.001** | 0.186 | <0.001 |
| KICH | **0.448** | **<0.001** | -0.095 | 0.450 | **0.667** | **<0.001** | **0.451** | **<0.001** | **0.533** | **<0.001** | 0.187 | 0.135 |
| KIRC | **0.453** | **<0.001** | **0.351** | **<0.001** | **0.262** | **<0.001** | **0.547** | **<0.001** | **0.426** | **<0.001** | **0.520** | **<0.001** |
| KIRP | **0.241** | **<0.001** | -0.012 | 0.842 | **0.255** | **<0.001** | **0.295** | **<0.001** | 0.100 | 0.114 | **0.135** | **0.030** |
| LGG | **0.321** | **<0.001** | 0.070 | 0.127 | **0.307** | **<0.001** | **0.188** | **<0.001** | **0.151** | **0.001** | 0.080 | 0.083 |
| LIHC | **0.373** | **<0.001** | **0.331** | **<0.001** | **0.206** | **<0.001** | **0.362** | **<0.001** | **0.405** | **<0.001** | **0.370** | **<0.001** |
| LUAD | **0.111** | **0.014** | **0.156** | **0.001** | 0.087 | 0.055 | **0.120** | **0.008** | 0.034 | 0.449 | **0.181** | **<0.001** |
| LUSC | **0.097** | **0.035** | **0.184** | **<0.001** | 0.007 | 0.886 | 0.070 | 0.127 | **-0.108** | **0.019** | -0.011 | 0.807 |
| MESO | **0.411** | **<0.001** | 0.032 | 0.773 | 0.176 | 0.110 | **0.255** | **0.019** | **0.254** | **0.020** | -0.188 | 0.087 |
| OV | 0.077 | 0.092 | **0.112** | **0.014** | -0.073 | 0.110 | 0.028 | 0.535 | **0.119** | **0.009** | 0.036 | 0.427 |
| PAAD | **0.410** | **<0.001** | -0.043 | 0.578 | **0.424** | **<0.001** | **0.445** | **<0.001** | **0.361** | **<0.001** | **0.280** | **<0.001** |
| PCPG | **0.323** | **<0.001** | 0.108 | 0.165 | **0.174** | **0.025** | 0.128 | 0.099 | **0.386** | **<0.001** | **0.318** | **<0.001** |
| PRAD | **0.447** | **<0.001** | **0.120** | **0.015** | **0.470** | **<0.001** | **0.377** | **<0.001** | **0.372** | **<0.001** | **0.392** | **<0.001** |
| READ | **0.205** | **0.016** | 0.163 | 0.055 | **0.360** | **<0.001** | **0.227** | **0.007** | 0.128 | 0.133 | **0.382** | **<0.001** |
| SARC | **0.146** | **0.024** | **-0.227** | **<0.001** | 0.002 | 0.969 | **-0.129** | **0.046** | **-0.239** | **<0.001** | 0.060 | 0.350 |
| SKCM | **0.155** | **0.001** | **0.206** | **<0.001** | **0.238** | **<0.001** | **0.199** | **<0.001** | **0.187** | **<0.001** | **0.280** | **<0.001** |
| STAD | -0.022 | 0.672 | **0.110** | **0.035** | -0.044 | 0.395 | 0.022 | 0.670 | -0.087 | 0.095 | 0.011 | 0.840 |
| TGCT | 0.121 | 0.146 | **-0.295** | **<0.001** | **0.345** | **<0.001** | **0.231** | **0.005** | -0.058 | 0.482 | -0.155 | 0.060 |
| THCA | **0.504** | **<0.001** | **0.391** | **<0.001** | **-0.137** | **0.002** | **0.308** | **<0.001** | **0.540** | **<0.001** | **0.291** | **<0.001** |
| THYM | **0.346** | **<0.001** | -0.183 | 0.054 | 0.136 | 0.149 | 0.007 | 0.944 | 0.063 | 0.509 | **0.234** | **0.012** |
| UCEC | **-0.197** | **0.001** | -0.203 | 0.001 | 0.073 | 0.214 | -0.030 | 0.606 | -0.019 | 0.752 | **0.267** | **<0.001** |
| UCS | 0.000 | 0.999 | -0.158 | 0.259 | -0.124 | 0.378 | -0.139 | 0.320 | 0.108 | 0.442 | -0.159 | 0.255 |
| UVM | 0.094 | 0.423 | -0.188 | 0.105 | 0.174 | 0.130 | 0.168 | 0.152 | -0.040 | 0.753 | 0.115 | 0.320 |
| Parameters with P-value<0.05 were highlighted in bold. | | | | | | | | | | | | |

| Table S12. Correlation between TP53 expression and typical infiltrating immune cells in 32 TCGA tumors (TIMER database) | | | | | | | | | | | | |
| --- | --- | --- | --- | --- | --- | --- | --- | --- | --- | --- | --- | --- |
| Type | B Cell | | CD4+ T Cell | | CD8+ T Cell | | Dendritic Cell | | Macrophage | | Neutrophil | |
| Cor | P-value | Cor | P-value | Cor | P-value | Cor | P-value | Cor | P-value | Cor | P-value |
| ACC | 0.159 | 0.178 | -0.019 | 0.875 | 0.209 | 0.076 | 0.124 | 0.297 | -0.060 | 0.613 | 0.176 | 0.135 |
| BLCA | 0.074 | 0.158 | 0.082 | 0.116 | **-0.143** | **0.006** | **-0.148** | **0.005** | -0.035 | 0.504 | **-0.110** | **0.036** |
| BRCA | **0.102** | **0.001** | 0.061 | 0.060 | 0.028 | 0.390 | 0.056 | 0.087 | -0.005 | 0.874 | 0.043 | 0.186 |
| CESC | 0.072 | 0.231 | **0.143** | **0.017** | -0.011 | 0.859 | -0.039 | 0.517 | 0.000 | 0.999 | 0.024 | 0.687 |
| CHOL | -0.046 | 0.794 | 0.074 | 0.671 | 0.085 | 0.627 | -0.009 | 0.960 | -0.282 | 0.100 | -0.203 | 0.241 |
| COAD | 0.013 | 0.800 | -0.052 | 0.296 | 0.005 | 0.918 | 0.020 | 0.683 | -0.064 | 0.198 | -0.046 | 0.362 |
| DLBC | 0.459 | 0.055 | -0.134 | 0.564 | 0.006 | 0.981 | 0.090 | 0.699 | -0.204 | 0.376 | 0.062 | 0.789 |
| ESCA | -0.100 | 0.184 | 0.093 | 0.216 | -0.144 | 0.054 | 0.064 | 0.393 | -0.013 | 0.865 | **-0.166** | **0.026** |
| GBM | 0.025 | 0.616 | **0.130** | **0.008** | 0.081 | 0.100 | **0.250** | **<0.001** | 0.078 | 0.110 | **0.147** | **0.003** |
| HNSC | **0.264** | **<0.001** | **0.318** | **<0.001** | **0.285** | **<0.001** | **0.312** | **<0.001** | **0.242** | **<0.001** | **0.290** | **<0.001** |
| KICH | 0.150 | 0.232 | 0.172 | 0.170 | 0.197 | 0.115 | **0.397** | **0.001** | 0.222 | 0.076 | 0.137 | 0.278 |
| KIRC | 0.177 | <0.001 | **0.344** | **<0.001** | **0.191** | **<0.001** | **0.263** | **<0.001** | **0.163** | **0.001** | **0.250** | **<0.001** |
| KIRP | -0.121 | 0.053 | 0.099 | 0.111 | **-0.179** | **0.004** | -0.088 | 0.160 | **-0.228** | **<0.001** | 0.100 | 0.110 |
| LGG | **0.228** | **<0.001** | **0.131** | **0.004** | 0.060 | 0.193 | **0.208** | **<0.001** | 0.051 | 0.265 | 0.015 | 0.751 |
| LIHC | **0.390** | **<0.001** | **0.322** | **<0.001** | **0.244** | **<0.001** | **0.290** | **<0.001** | **0.294** | **<0.001** | **0.211** | **<0.001** |
| LUAD | 0.050 | 0.270 | 0.089 | 0.050 | -0.072 | 0.112 | -0.052 | 0.250 | -0.070 | 0.122 | -0.062 | 0.172 |
| LUSC | 0.081 | 0.080 | **0.138** | **0.003** | 0.062 | 0.178 | **0.107** | **0.020** | -0.037 | 0.418 | 0.029 | 0.522 |
| MESO | -0.050 | 0.654 | **0.247** | **0.024** | -0.219 | 0.045 | 0.060 | 0.586 | -0.144 | 0.192 | **-0.234** | **0.032** |
| OV | 0.021 | 0.645 | -0.023 | 0.611 | **-0.100** | **0.029** | -0.009 | 0.851 | **-0.127** | **0.005** | -0.076 | 0.096 |
| PAAD | 0.103 | 0.179 | **0.248** | **0.001** | -0.009 | 0.907 | 0.115 | 0.133 | 0.089 | 0.248 | **0.160** | **0.036** |
| PCPG | 0.075 | 0.334 | **0.314** | **<0.001** | -0.014 | 0.859 | **0.396** | **<0.001** | 0.015 | 0.844 | -0.142 | 0.068 |
| PRAD | 0.003 | 0.949 | -0.026 | 0.599 | **0.116** | **0.018** | 0.028 | 0.563 | -0.002 | 0.971 | -0.009 | 0.862 |
| READ | 0.105 | 0.220 | -0.061 | 0.477 | -0.046 | 0.589 | -0.127 | 0.138 | -0.036 | 0.673 | -0.094 | 0.275 |
| SARC | -0.103 | 0.114 | 0.085 | 0.192 | -0.117 | 0.070 | **-0.197** | **0.002** | **-0.184** | **0.005** | 0.122 | 0.058 |
| SKCM | 0.014 | 0.762 | **0.109** | **0.022** | **-0.150** | **0.002** | -0.024 | 0.612 | 0.066 | 0.164 | -0.027 | 0.572 |
| STAD | **-0.115** | **0.027** | 0.013 | 0.809 | **0.106** | **0.042** | 0.099 | 0.056 | -0.078 | 0.133 | **0.114** | **0.028** |
| TGCT | -0.069 | 0.405 | **0.302** | **<0.001** | **-0.270** | **0.001** | -0.075 | 0.366 | 0.071 | 0.393 | 0.053 | 0.521 |
| THCA | **0.223** | **<0.001** | **0.328** | **<0.001** | -0.059 | 0.196 | **0.201** | **<0.001** | **0.096** | **0.034** | **0.223** | **<0.001** |
| THYM | **0.677** | **<0.001** | **0.615** | **<0.001** | **0.430** | **<0.001** | **0.708** | **<0.001** | **0.423** | **<0.001** | **-0.392** | **<0.001** |
| UCEC | **-0.158** | **0.007** | -0.101 | 0.085 | -0.027 | 0.649 | -0.030 | 0.608 | **-0.131** | **0.026** | -0.070 | 0.230 |
| UCS | 0.264 | 0.056 | 0.110 | 0.432 | -0.007 | 0.958 | 0.027 | 0.848 | 0.052 | 0.713 | 0.068 | 0.629 |
| UVM | **-0.330** | **0.004** | -0.038 | 0.743 | 0.130 | 0.261 | **0.231** | **0.048** | -0.070 | 0.582 | **-0.439** | **<0.001** |
| Parameters with P-value<0.05 were highlighted in bold. | | | | | | | | | | | | |

| Table S13. The correlation between JUN expression and immune cells related gene markers across 32 human tumors. (TIMER database). | | | | | | | | | | | | | | | | | | | | | | | | | | | | | | | | | |
| --- | --- | --- | --- | --- | --- | --- | --- | --- | --- | --- | --- | --- | --- | --- | --- | --- | --- | --- | --- | --- | --- | --- | --- | --- | --- | --- | --- | --- | --- | --- | --- | --- | --- |
| Cell Type | Gene Marker | ACC | BLCA | BRCA | CESC | CHOL | COAD | DLBC | ESCA | GBM | HNSC | KICH | KIRC | KIRP | LGG | LIHC | LUAD | LUSC | MESO | OV | PAAD | PCPG | PRAD | READ | SARC | SKCM | STAD | TGCT | THCA | THYM | UCEC | UCS | UVM |
| Th1 | IL12RB2 | 0.3* | 0.19*** | -0.07* | 0.13* | 0.26 | 0.09 | 0.44** | 0.31*** | -0.03 | 0.24*** | 0.02 | -0.02 | 0.22*** | -0.04 | 0.26*** | -0.04 | 0.1* | 0.14 | 0.16* | -0.06 | 0.15 | 0.25*** | 0.22** | 0.13* | -0.03 | -0.01 | -0.02 | 0.1* | 0.6*** | 0.12* | 0.16 | 0.16 |
|  | WSX-1 | 0.24* | 0.11* | 0.11*** | -0.03 | 0.14 | 0.1* | 0.04 | 0.22** | 0.31*** | 0.14** | 0.3* | 0.16** | 0.24*** | 0.05 | 0.13* | 0.27*** | 0.03 | 0.02 | 0.01 | 0.32*** | 0.14 | 0.14** | 0.21* | -0.04 | -0.04 | 0.23*** | 0.31*** | -0.03 | -0.04 | 0.07 | 0.05 | 0 |
|  | T-BET | 0.14 | -0.02 | 0.01 | -0.03 | 0.09 | 0.01 | 0.32* | 0.09 | -0.02 | 0 | 0.33** | 0.13** | 0.12 | 0.26*** | 0.04 | 0.18*** | 0 | 0.06 | -0.15* | 0.22** | 0.09 | 0.19*** | 0.18* | 0 | 0.11* | 0.12* | -0.13 | -0.04 | 0.22* | -0.12* | -0.03 | 0.19 |
| Th2 | CCR3 | 0.15 | 0.05 | 0.05 | -0.07 | 0.07 | 0.07 | 0.53*** | 0.12 | 0.17* | 0.12* | 0.08 | -0.04 | 0.19** | 0.27*** | 0.13* | 0.02 | -0.04 | 0.08 | 0.1 | 0.14 | 0.21** | 0.14** | -0.07 | 0.02 | 0.11* | -0.1 | 0.26** | 0.07 | 0.33*** | 0.08 | 0.23 | 0.06 |
|  | STAT6 | 0.02 | 0.09 | 0.26*** | 0.27*** | 0.32 | 0.23*** | 0.61*** | 0.06 | 0.1 | 0.16*** | 0.32* | 0.12** | 0.28*** | 0.27*** | 0.3*** | 0.24*** | 0.21*** | -0.17 | 0.34*** | 0.28*** | 0.13 | 0.36*** | 0.28** | 0 | 0.02 | 0.23*** | 0.82*** | -0.01 | 0.39*** | 0.11 | 0.19 | 0.02 |
|  | GATA-3 | 0.11 | -0.05 | 0.09*** | 0.04 | -0.03 | 0.14** | 0.11 | 0.14 | 0.28** | 0.17*** | -0.02 | 0.03 | 0.08 | 0.31*** | 0.13* | 0.2*** | 0.18*** | 0.13 | -0.02 | 0.23** | -0.23** | 0.07 | 0.16 | 0.07 | 0.05 | 0.17** | 0.59*** | 0.02 | -0.42*** | -0.07 | 0.04 | 0.2 |
| Th9 | TGFBR2 | 0.28* | 0.19*** | 0.24*** | 0.19** | 0.49** | 0.28*** | 0.56*** | 0.09 | 0.31*** | 0.28*** | -0.1 | 0.29*** | 0.34*** | 0.3*** | 0.32*** | 0.29*** | 0.31*** | 0.25* | 0.25*** | 0.32*** | 0.33*** | 0.3*** | 0.39*** | 0.23*** | 0.24*** | 0.2*** | 0.6*** | 0.37*** | 0.49*** | 0.12* | 0.48*** | 0.4*** |
|  | IRF4 | 0.39*** | 0.07 | -0.05 | -0.10 | 0.28 | 0.13** | 0.5** | 0.09 | 0.05 | 0.08 | 0.37** | 0.07 | 0.19** | 0.17*** | 0.09 | 0.09* | 0.05 | 0.19 | -0.1 | 0.25** | 0.24** | 0.36*** | 0.08 | 0.21** | -0.02 | 0.07 | -0.22** | -0.15** | 0.43*** | -0.09 | 0.01 | 0.2 |
|  | PU.1 | 0.22 | 0.13* | 0.1*** | 0.05 | 0.03 | 0.09 | 0.4** | 0.14 | 0.16 | 0.08 | 0.27* | 0.01 | 0.21** | 0.46*** | 0.26*** | 0.31*** | 0.13** | 0 | -0.05 | 0.32*** | 0.09 | 0.18*** | 0.05 | -0.06 | 0.2*** | 0.09 | 0.24** | -0.11* | 0.38*** | -0.02 | 0.29* | 0.24* |
| Th17 | IL-21 R | 0.24* | 0.08 | -0.06 | -0.02 | 0.2 | 0.13** | 0.61*** | 0.12 | 0.13 | 0.08 | 0.27* | 0.1* | 0.14* | 0 | 0.12* | 0.18*** | 0.05 | -0.11 | -0.13* | 0.25** | 0.04 | 0.25*** | 0.2* | 0.04 | 0.13** | 0.12* | -0.04 | -0.07 | -0.15 | -0.03 | 0.16 | 0.13 |
|  | IL-23R | 0.16 | 0.05 | -0.04 | 0.08 | 0.31 | 0.14** | 0.33* | -0.13 | -0.11 | 0.09* | 0.05 | 0.04 | 0.25*** | 0.11* | 0.15** | 0.01 | 0.07 | 0.01 | 0.05 | 0.14 | 0.11 | 0.17** | -0.01 | -0.11 | -0.06 | 0.06 | -0.15 | -0.06 | 0.45*** | 0.03 | 0.08 | 0.07 |
|  | STAT3 | 0.51*** | 0.31*** | 0.13*** | 0.25*** | 0.3 | 0.25*** | 0.72*** | 0.15* | 0.55*** | 0.2*** | 0.16 | 0.28*** | 0.35*** | 0.45*** | 0.35*** | 0.22*** | 0.24*** | 0.09 | 0.15* | 0.28*** | 0.23** | 0.27*** | 0.24** | 0.18** | 0.18*** | 0.25*** | 0.54*** | 0.15** | 0.58*** | 0.22*** | 0.21 | 0.17 |
| Th22 | CCR10 | 0.4*** | 0.03 | 0.31*** | 0.07 | 0.06 | 0.14** | 0.21 | -0.04 | 0.12 | -0.08 | -0.02 | 0.21*** | 0.15* | 0.27*** | 0.14** | 0.15** | 0.22*** | 0.11 | 0.05 | 0.25** | 0.06 | 0.14** | -0.02 | -0.07 | 0.06 | 0.29*** | 0.65*** | 0.14** | -0.08 | -0.02 | -0.01 | -0.06 |
|  | AHR | 0.29* | 0.12* | 0.15*** | 0.16** | 0.54*** | -0.05 | 0.56*** | 0.2** | 0.07 | 0.14** | 0.12 | 0.21*** | 0.3*** | 0.34*** | 0.39*** | 0.24*** | -0.05 | 0.34** | 0.09 | 0.35*** | 0.34*** | 0.4*** | 0.18* | 0.16* | 0.19*** | 0.15** | 0.56*** | 0.09* | 0.51*** | 0.19** | 0.54*** | 0.34** |
| Bcell | CD19 | -0.06 | 0.02 | 0.01 | -0.145* | 0.2 | 0.15** | -0.09 | -0.07 | -0.01 | -0.03 | 0.17 | 0.1* | 0.13* | 0.22*** | -0.03 | 0.09* | 0.01 | 0.14 | -0.05 | 0.24** | 0.08 | 0.11* | 0.11 | -0.01 | 0.1* | 0.16** | -0.38*** | -0.04 | 0.42*** | -0.1 | 0.13 | 0.02 |
|  | CD20 | -0.1 | -0.15*** | 0.02 | -0.02 | 0.19 | 0.04 | 0.12 | -0.18* | 0.24** | -0.06 | 0.15 | -0.03 | -0.09 | 0.1* | 0.17** | 0.04 | -0.09* | -0.04 | 0.04 | -0.04 | 0.09 | 0.11* | -0.11 | 0.04 | -0.06 | 0.04 | 0.5*** | 0.1* | -0.03 | -0.05 | 0.08 | 0.03 |
|  | CD38 | 0.21 | 0.11* | -0.11*** | -0.073 | 0.04 | 0.02 | 0.45** | 0.12 | -0.17* | 0.01 | 0.18 | 0.1* | 0.21** | 0.01 | 0.1 | -0.09* | -0.06 | 0.07 | -0.13* | 0.2** | 0.28*** | 0.13** | 0.11 | 0.05 | 0.15** | 0.01 | -0.46*** | 0.06 | -0.29** | 0 | 0.23 | 0.12 |
| CD8+ T Cell | CD8A | 0.13 | 0.1 | 0.03 | 0.002 | 0.06 | -0.05 | 0.31* | 0.06 | -0.09 | 0.08 | 0.34** | 0.11* | 0.17** | 0.18*** | 0.11* | 0.02 | -0.12** | 0.2 | -0.14* | 0.26** | 0.16* | 0.22*** | 0.09 | 0.09 | 0.09* | 0.13* | -0.06 | 0.02 | -0.42*** | -0.1 | 0.03 | 0.2 |
|  | CD8B | 0.17 | 0.08 | 0.04 | -0.033 | 0 | -0.09 | 0.04 | 0.08 | -0.18* | 0.02 | 0.34** | 0.09 | 0.11 | -0.05 | -0.03 | -0.04 | -0.11* | 0.1 | -0.19** | 0.18* | 0.12 | 0 | 0.11 | -0.02 | 0.07 | 0.06 | 0.06 | -0.01 | -0.56*** | 0 | -0.04 | 0.21 |
| Tfh | CXCR5 | 0.01 | 0 | 0 | -0.021 | 0.24 | 0.19*** | 0.07 | 0.08 | 0.03 | -0.03 | 0.17 | 0.12** | 0.16** | 0.28*** | 0.05 | 0.18*** | 0.08 | 0.19 | 0.03 | 0.2* | 0.16* | 0.23*** | 0.13 | -0.05 | 0.09* | 0.19*** | -0.12 | 0.01 | 0.25** | -0.07 | 0.06 | 0.08 |
|  | ICOS | 0.28* | 0.09 | -0.12*** | 0.061 | 0.25 | 0.05 | -0.03 | 0.26*** | -0.1 | 0.14** | 0.4** | 0.09* | 0.2** | 0.3*** | 0.13* | 0.11* | -0.02 | 0.21 | -0.11 | 0.29*** | 0.1 | 0.39*** | 0.1 | 0.03 | 0.13** | 0.02 | -0.06 | -0.04 | -0.27** | -0.04 | 0.26 | 0.29* |
|  | BCL-6 | 0.37*** | 0.1 | 0.15*** | 0.288*** | 0.23 | 0.17** | 0.07 | 0.32*** | 0.46*** | 0.16*** | 0.22 | 0.38*** | 0.31*** | 0.31*** | 0.41*** | 0.36*** | 0.23*** | 0.45*** | 0.26*** | 0.38*** | 0.31*** | 0.41*** | 0.36*** | 0.34*** | 0.31*** | 0.3*** | 0.74*** | 0.22*** | 0.27** | 0.27*** | 0.37** | 0.27* |
| TAM | HLA-G | 0.12 | 0.13* | 0 | 0.044 | 0.09 | -0.09 | 0.01 | 0.03 | 0.1 | 0.04 | 0.16 | 0.14** | 0.22*** | 0.27*** | 0.16** | 0.15** | 0.08 | -0.01 | -0.02 | 0.09 | 0.11 | 0.05 | -0.12 | -0.01 | 0.1* | -0.06 | 0.28** | -0.2*** | 0.43*** | 0.14* | 0.23 | 0.28* |
|  | CD80 | 0.3 | 0.22*** | -0.13*** | 0.128* | 0.04 | 0.02 | 0.39* | 0.26** | 0.15 | 0.23*** | 0.28* | 0.13** | 0.21** | 0.43*** | 0.33*** | 0.21*** | 0.05 | 0.17 | 0.05 | 0.27*** | 0.2** | 0.26*** | 0.16 | 0.09 | 0.17*** | -0.01 | 0.04 | 0.03 | 0.49*** | 0.08 | 0.18 | 0.2 |
|  | CD86 | 0.3 | 0.13* | -0.04 | 0.084 | 0.17 | -0.02 | 0.3 | 0.25** | 0.05 | 0.15** | 0.23 | 0.01 | 0.23*** | 0.44*** | 0.27*** | 0.13** | 0 | 0.03 | -0.01 | 0.24** | 0.19* | 0.22*** | 0.08 | 0.02 | 0.21*** | -0.03 | 0.24** | -0.08 | 0.42*** | -0.05 | 0.26 | 0.42*** |
| Monocyte | CD14 | 0.08 | 0.17*** | 0.1*** | -0.059 | -0.11 | 0.06 | 0.22 | 0.14 | 0.28** | 0.05 | 0.14 | 0.1* | 0.24*** | 0.39*** | 0 | 0.14** | 0.07 | -0.13 | 0.01 | 0.24** | 0.13 | 0.22*** | 0 | -0.02 | 0.2*** | 0.09 | 0.56*** | 0.06 | 0.09 | -0.03 | 0.26 | 0.29* |
|  | CD16 | 0.29* | 0.16*** | -0.07* | -0.031 | 0.27 | -0.04 | 0.56*** | 0.13 | 0.14 | 0.11* | 0.29* | 0.02 | 0.13* | 0.42*** | 0.24*** | 0.05 | -0.03 | -0.01 | -0.01 | 0.13 | 0.11 | 0.11* | 0.09 | 0.01 | 0.19*** | -0.02 | 0.4*** | -0.1* | 0.38*** | -0.07 | 0.21 | 0.22 |
| NK | XCL1 | 0.26* | 0.07 | -0.03 | -0.064 | 0.16 | -0.01 | 0.16 | 0.24** | -0.04 | 0.03 | 0.35** | -0.05 | 0.15* | 0.22*** | 0.05 | -0.11* | 0.01 | 0.11 | -0.1 | 0.29*** | 0.07 | 0.25*** | 0.07 | -0.03 | 0.08 | 0.07 | 0.13 | -0.09* | 0.1 | -0.06 | 0.11 | 0.12 |
|  | KIR3DL1 | 0.05 | 0.04 | -0.01 | 0.008 | -0.13 | -0.13** | 0.13 | 0.01 | -0.05 | 0.01 | 0.08 | 0.1* | 0.07 | -0.01 | 0.08 | 0 | 0.01 | 0.1 | -0.12 | -0.03 | 0.01 | -0.06 | -0.02 | 0.06 | -0.05 | -0.05 | 0.04 | -0.02 | 0.2* | -0.07 | 0.33* | 0.04 |
|  | CD7 | 0.18 | 0.07 | 0.05 | -0.082 | -0.1 | 0.04 | -0.2 | 0.1 | 0.13 | 0 | 0.3* | 0.04 | 0.12 | 0.43*** | 0.04 | 0.14** | 0.01 | 0.1 | -0.1 | 0.2** | 0.11 | 0.11* | 0 | 0.07 | 0.1* | 0.14** | -0.04 | -0.1* | -0.59*** | -0.08 | 0.25 | 0.13 |
| Neutrophil | CD15 | 0.21 | 0.12* | 0.08* | -0.033 | 0.61*** | 0.2*** | 0.53*** | -0.16* | 0.26** | 0.11* | 0.25* | 0.28*** | 0.47*** | 0.41*** | 0.19*** | 0.1* | 0.24*** | 0.21 | 0.25*** | 0.27*** | 0.16* | 0.32*** | 0.05 | 0.21** | 0.14** | 0.18** | -0.23** | 0.28*** | 0.13 | 0.04 | 0.02 | 0.35** |
|  | MPO | 0.1 | 0.08 | 0.06 | 0.029 | 0.18 | 0.03 | 0.5** | 0.11 | -0.08 | 0.02 | 0 | 0.01 | 0.08 | -0.09* | 0.11* | 0.14** | 0.03 | 0.19 | 0.1 | 0.26** | -0.08 | 0.21*** | 0 | 0.07 | 0 | 0.05 | -0.18* | 0.04 | -0.02 | 0.1 | -0.11 | 0.18 |
| DC | CD1C | 0.22 | 0.11* | 0.23*** | 0.157** | 0.06 | 0.15** | 0.12 | 0.25** | -0.19* | 0.11* | 0.23 | 0.05 | 0.31*** | 0.18*** | 0.03 | 0.29*** | 0.08 | 0.18 | 0.01 | 0.28*** | 0.08 | 0.24*** | 0.08 | -0.03 | 0.11* | 0.18*** | 0.44*** | -0.07 | -0.45*** | -0.01 | 0.38** | 0.27* |
|  | CD141 | 0.49*** | 0.21*** | 0.33*** | 0.247*** | 0.27 | 0.21*** | 0.18 | 0.35*** | 0.34*** | 0.2*** | 0.04 | 0.42*** | 0.36*** | 0.46*** | 0.26*** | 0.27*** | 0.12** | 0.4*** | 0.36*** | 0.45*** | 0.5*** | 0.4*** | 0.16 | 0.14* | 0.14** | 0.35*** | 0.77*** | 0.51*** | 0.57*** | 0.09 | 0.27 | 0.21 |
| Treg | FOXP3 | 0.18 | 0.18*** | -0.08* | 0.144* | 0.1 | 0.17** | 0.12 | 0.23** | 0.06 | 0.16*** | -0.01 | 0.03 | 0.09 | -0.12* | 0.29*** | 0.19*** | 0.13** | 0.09 | -0.04 | 0.28*** | 0.07 | 0.2*** | 0.19* | 0.1 | 0.09* | 0.13* | -0.01 | -0.1* | 0.57*** | -0.02 | 0.32* | -0.06 |
|  | CCR8 | 0.28* | 0.15*** | -0.12*** | 0.211*** | 0.32 | 0.16** | 0.31 | 0.23** | 0.07 | 0.21*** | 0.07 | 0.04 | 0.13* | 0.1* | 0.3*** | 0.12** | 0.07 | 0.08 | -0.01 | 0.26** | 0.08 | 0.3*** | 0.26** | 0.11 | 0.13** | 0.11* | -0.12 | -0.06 | 0.19* | 0.07 | 0.4** | 0.13 |
|  | CD25 | 0.18 | 0.07 | -0.07* | -0.073 | -0.2 | -0.12* | -0.24 | -0.02 | 0.23** | 0.01 | 0.12 | 0.12* | 0.19** | 0.3*** | -0.14* | -0.11* | 0.05 | -0.01 | -0.07 | 0.2** | 0.21** | 0 | -0.14 | 0 | -0.09 | -0.08 | 0.11 | 0.08 | -0.27** | -0.1 | 0.1 | 0.07 |
| T cell exhaustion | PD-1 | 0.26* | 0.06 | 0.05 | -0.045 | -0.03 | 0.01 | -0.06 | 0.09 | 0.03 | 0.04 | 0.4** | 0.09 | 0.12* | 0.47*** | 0.07 | 0.17*** | -0.02 | 0.08 | -0.07 | 0.22** | 0.03 | 0.12* | 0.07 | 0 | 0.08 | 0.14** | -0.15 | 0 | -0.39*** | -0.08 | 0.17 | 0.21 |
|  | CTLA4 | 0.15 | 0.08 | -0.09*** | -0.013 | 0.24 | 0.07 | -0.1 | 0.21** | -0.05 | 0.09 | 0.17 | 0.1* | 0.06 | 0.22*** | 0.07 | 0.17*** | 0.03 | 0.25* | -0.04 | 0.3*** | 0.11 | 0.24*** | 0.17* | 0.05 | -0.03 | 0.05 | -0.08 | -0.09 | 0.44*** | -0.04 | 0.25 | 0.14 |
| Macrophage | CD68 | 0.46*** | 0.14* | -0.03 | 0.021 | 0.08 | -0.03 | 0.4** | 0.08 | 0.17 | 0.11* | 0.18 | 0.02 | 0.25*** | 0.42*** | 0.2*** | 0.1* | 0.07 | -0.06 | -0.06 | 0.22** | 0.21** | 0.16** | 0.14 | 0.01 | -0.07 | 0.04 | 0.26** | -0.07 | 0.37*** | -0.05 | 0.08 | -0.03 |
|  | CD11b | 0.29* | 0.13* | 0.08* | 0.045 | 0.06 | 0.06 | 0.49** | 0.15* | 0.28** | 0.03 | 0.23 | 0.02 | 0.22*** | 0.37*** | 0.26*** | 0.3*** | 0.16*** | -0.04 | 0.1 | 0.27*** | 0.22** | 0.27*** | 0.24** | 0.03 | 0.18*** | 0.11* | 0.19* | -0.13** | 0.27** | 0.01 | 0.11 | 0.29* |
| M1 | NOS2 | 0.22 | 0.08 | 0.16*** | 0.099 | 0.02 | 0.03 | 0.36* | -0.18* | 0.2* | 0.02 | -0.07 | 0.24*** | 0.16** | 0.04 | 0.22*** | 0.12** | 0.02 | 0.17 | 0.09 | 0.14 | 0.08 | 0.2*** | -0.06 | 0.09 | 0.07 | 0.06 | 0.39*** | 0.22*** | 0.09 | 0.05 | -0.1 | -0.06 |
|  | ROS | 0.13 | 0.16*** | -0.06 | 0.152* | 0.21 | 0.05 | 0.46** | 0.24** | 0.06 | 0.27*** | -0.04 | 0 | 0.08 | -0.14** | 0.3*** | 0.33*** | 0.24*** | 0.2 | 0.02 | 0.32*** | 0.06 | 0.17*** | -0.14 | 0.06 | 0.05 | 0.13* | 0.5*** | 0.1* | 0.22* | 0.15** | 0.26 | -0.15 |
| M2 | ARG1 | 0.14 | 0.21*** | 0.04 | 0.144* | -0.04 | 0.07 | 0.31* | 0.07 | 0.03 | -0.09 | 0.09 | 0.13** | 0.23*** | 0.1* | -0.01 | 0.08 | 0.05 | 0.18 | 0.16* | 0.09 | 0.17* | 0.07 | 0.21* | 0.06 | -0.05 | -0.04 | 0.17* | 0.14** | 0.31** | 0.03 | 0.15 | -0.13 |
|  | MRC1 | 0.24 | 0.16*** | 0.07* | 0.02 | 0.14 | -0.03 | 0.46** | 0.2** | 0.19* | 0.11* | -0.08 | 0.19*** | 0.27*** | 0.03 | 0.16** | 0.22*** | 0.12** | 0.01 | 0.1 | 0.19* | 0.31*** | 0.2*** | 0.1 | 0.01 | 0.09 | 0.02 | 0.31*** | -0.09 | 0.33*** | -0.06 | 0.37** | 0.24* |
| *P < 0.05, **P < 0.01, ***P < 0.001. | | | | | | | | | | | | | | | | | | | | | | | | | | | | | | | | | |

| Table S14. The correlation between NFKB1 expression and immune cells related gene markers across 32 human tumors. (TIMER database). | | | | | | | | | | | | | | | | | | | | | | | | | | | | | | | | | |
| --- | --- | --- | --- | --- | --- | --- | --- | --- | --- | --- | --- | --- | --- | --- | --- | --- | --- | --- | --- | --- | --- | --- | --- | --- | --- | --- | --- | --- | --- | --- | --- | --- | --- |
| Cell Type | Gene Marker | ACC | BLCA | BRCA | CESC | CHOL | COAD | DLBC | ESCA | GBM | HNSC | KICH | KIRC | KIRP | LGG | LIHC | LUAD | LUSC | MESO | OV | PAAD | PCPG | PRAD | READ | SARC | SKCM | STAD | TGCT | THCA | THYM | UCEC | UCS | UVM |
| Th1 | IL12RB2 | 0.38** | 0.26*** | 0.12*** | 0.26*** | 0.19 | 0.39*** | 0.62*** | 0.24** | 0.17* | 0.18*** | 0.4** | 0.23*** | 0.35*** | -0.1* | 0.35*** | 0.23*** | 0.15** | 0.23* | 0.16* | 0.29*** | 0.34*** | 0.43*** | 0.45*** | 0.18** | 0.13** | 0.44*** | 0.39*** | 0.44*** | 0.51*** | 0.23*** | 0.12 | 0.07 |
|  | WSX-1 | 0.28* | 0.19*** | 0.2*** | 0.28*** | 0.22 | 0.36*** | 0.19 | 0.22** | 0.3*** | 0.32*** | 0.23 | 0.19*** | 0.28*** | 0.12** | 0.46*** | 0.35*** | 0.35*** | 0.22* | 0.16* | 0.51*** | 0.39*** | 0.48*** | 0.28** | 0.01 | 0.34*** | 0.34*** | 0.57*** | 0.29*** | 0.15 | 0.16** | 0.31* | 0.45*** |
|  | T-BET | 0.13 | 0.14** | 0.08** | 0.22*** | 0.27 | 0.37*** | 0.27 | 0.25** | 0.1 | 0.2*** | 0.18 | 0.26*** | 0.02 | 0.23*** | 0.24*** | 0.31*** | 0.21*** | 0.29** | 0.34*** | 0.3*** | 0.18* | 0.33*** | 0.24** | 0.21** | 0.24*** | 0.47*** | 0.29*** | 0.16*** | 0.36*** | 0 | 0.27* | 0.33** |
| Th2 | CCR3 | -0.03 | 0.08 | 0.18*** | 0.06 | 0.04 | 0.22*** | 0.38* | 0.01 | 0.23** | 0.18*** | 0.19 | 0.19*** | 0.17** | 0.29*** | 0.32*** | 0.02 | 0.02 | 0.24* | 0.1 | 0.36*** | 0.23** | 0.25*** | 0.1 | 0.13* | 0.34*** | 0.2*** | 0.27** | 0.31*** | 0.13 | -0.05 | 0.28* | 0.32** |
|  | STAT6 | 0.56*** | 0.41*** | 0.43*** | 0.59*** | 0.55*** | 0.29*** | 0.84*** | 0.45*** | 0.5*** | 0.5*** | 0.54*** | 0.57*** | 0.64*** | 0.3*** | 0.46*** | 0.45*** | 0.41*** | 0.55*** | 0.44*** | 0.43*** | 0.3*** | 0.45*** | 0.34*** | 0.24*** | 0.35*** | 0.51*** | 0.73*** | 0.6*** | 0.75*** | 0.4*** | 0.25 | 0.44*** |
|  | GATA-3 | 0.06 | -0.13* | 0.21*** | 0.24*** | 0.16 | 0.3*** | 0.27 | 0.09 | 0.31*** | 0.16*** | 0.28* | 0.02 | 0.05 | 0.3*** | 0.38*** | 0.31*** | 0.33*** | 0.01 | 0.08 | 0.21** | 0.09 | 0.33*** | 0.13 | 0.06 | 0.25*** | 0.22*** | 0.58*** | 0.25*** | -0.14 | 0.02 | -0.07 | 0.36** |
| Th9 | TGFBR2 | 0.52*** | 0.44*** | 0.46*** | 0.26*** | 0.56*** | 0.32*** | 0.72*** | 0.17* | 0.62*** | 0.43*** | 0.44*** | 0.67*** | 0.72*** | 0.58*** | 0.68*** | 0.53*** | 0.38*** | 0.28** | 0.23*** | 0.63*** | 0.65*** | 0.59*** | 0.45*** | 0.36*** | 0.55*** | 0.31*** | 0.89*** | 0.57*** | 0.73*** | 0.58*** | 0.37** | 0.62*** |
|  | IRF4 | 0.25* | 0.22*** | 0.16*** | 0.29*** | 0.3 | 0.33*** | 0.54*** | 0.33*** | 0.26** | 0.42*** | 0.26* | 0.2*** | 0.12 | 0.28*** | 0.37*** | 0.27*** | 0.19*** | 0.31** | 0.25*** | 0.44*** | 0.43*** | 0.44*** | 0.28** | 0.31*** | 0.15** | 0.38*** | 0.22** | 0.17*** | 0.09 | 0.1 | 0.3* | 0.5*** |
|  | PU.1 | 0.02 | 0.15** | 0.15*** | 0.17** | 0.24 | 0.4*** | 0.37* | 0.23** | 0.4*** | 0.28*** | 0.09 | 0.17*** | 0.06 | 0.51*** | 0.47*** | 0.37*** | 0.25*** | 0.09 | 0.35*** | 0.29*** | 0.24** | 0.3*** | 0.09 | 0.08 | 0.19*** | 0.38*** | 0.49*** | 0.14** | 0.27** | 0.14* | 0.22 | 0.15 |
| Th17 | IL-21 R | 0.1 | 0.24*** | 0.23*** | 0.29*** | 0.36* | 0.42*** | 0.65*** | 0.38*** | 0.39*** | 0.34*** | 0.25* | 0.26*** | 0.1 | 0.27*** | 0.43*** | 0.47*** | 0.3*** | 0.15 | 0.39*** | 0.41*** | 0.32*** | 0.36*** | 0.22** | 0.21** | 0.39*** | 0.51*** | 0.48*** | 0.29*** | -0.19* | 0.22*** | 0.34* | 0.3** |
|  | IL-23R | 0.21 | 0.16** | 0.26*** | 0.25*** | 0.23 | 0.13* | 0.24 | 0.18* | 0 | 0.31*** | 0.03 | 0.21*** | 0.35*** | 0.12* | 0.3*** | 0.28*** | 0.19*** | 0.17 | 0.05 | 0.4*** | 0.07 | 0.29*** | 0.31*** | 0.04 | 0.27*** | 0.27*** | 0.33*** | 0.23*** | 0.45*** | 0.06 | 0.15 | 0.38** |
|  | STAT3 | 0.67*** | 0.62*** | 0.57*** | 0.65*** | 0.34* | 0.63*** | 0.83*** | 0.52*** | 0.71*** | 0.61*** | 0.5*** | 0.78*** | 0.66*** | 0.72*** | 0.6*** | 0.48*** | 0.52*** | 0.6*** | 0.42*** | 0.7*** | 0.61*** | 0.74*** | 0.63*** | 0.47*** | 0.5*** | 0.55*** | 0.72*** | 0.78*** | 0.74*** | 0.64*** | 0.67*** | 0.74*** |
| Th22 | CCR10 | 0.26* | -0.11* | -0.09** | 0.13* | 0.36* | 0.06 | 0.23 | 0.03 | 0.15 | 0.19*** | -0.25* | -0.03 | -0.15* | 0.07 | 0.28*** | -0.06 | 0.12** | -0.16 | -0.01 | -0.14 | 0.08 | -0.07 | -0.02 | 0.14* | 0.09* | 0.05 | 0.63*** | -0.09* | 0.11 | -0.11 | -0.03 | 0.21 |
|  | AHR | 0.38** | 0.32*** | 0.46*** | 0.24*** | 0.44** | 0.32*** | 0.74*** | 0.29*** | 0.11 | 0.41*** | 0.72*** | 0.6*** | 0.55*** | 0.41*** | 0.49*** | 0.34*** | 0.18*** | 0.17 | 0.22*** | 0.51*** | 0.54*** | 0.6*** | 0.41*** | 0.18** | 0.48*** | 0.47*** | 0.84*** | 0.55*** | 0.71*** | 0.4*** | 0.26 | 0.74*** |
| Bcell | CD19 | -0.02 | 0 | -0.03 | 0.11 | 0.19 | 0.16** | -0.14 | 0.14 | 0.07 | 0.22*** | 0.06 | 0.01 | 0.07 | 0.25*** | 0.16** | 0.06 | 0.08 | 0.16 | 0.04 | 0.23** | 0.08 | 0.08 | 0.14 | 0 | 0.15** | 0.2*** | -0.08 | 0.12* | 0.01 | -0.09 | -0.04 | 0.02 |
|  | CD20 | 0.1 | -0.23*** | -0.06 | 0.08 | -0.13 | 0.05 | 0.28 | -0.06 | 0.13 | -0.03 | -0.11 | -0.02 | -0.05 | 0.11* | 0.15** | 0 | -0.17*** | 0.03 | -0.2** | 0.27*** | 0.05 | 0.13** | 0.24** | 0.06 | -0.01 | -0.15** | 0.4*** | 0.06 | 0.14 | -0.04 | 0.05 | 0.05 |
|  | CD38 | 0.22 | 0.26*** | 0.09** | 0.15* | 0.03 | 0.32*** | 0.55*** | 0.29*** | 0.13 | 0.22*** | 0.33** | 0.29*** | 0.16** | 0.31*** | 0.3*** | 0.07 | 0.12** | 0.22* | 0.28*** | 0.49*** | 0.32*** | 0.02 | 0.3*** | 0.32*** | 0.33*** | 0.43*** | 0.09 | 0.29*** | -0.09 | 0.2*** | 0.33* | 0.42*** |
| CD8+ T Cell | CD8A | 0.06 | 0.19*** | 0.14*** | 0.22*** | 0.18 | 0.35*** | 0.43** | 0.19** | -0.12 | 0.23*** | 0.27* | 0.13** | 0.05 | 0.09 | 0.33*** | 0.24*** | 0.12* | 0.29** | 0.24*** | 0.4*** | 0.3*** | 0.43*** | 0.2* | 0.21** | 0.22*** | 0.42*** | 0.32*** | 0.24*** | -0.19* | 0.06 | 0.33* | 0.39*** |
|  | CD8B | 0.1 | 0.12* | 0.05 | 0.13* | -0.06 | 0.17*** | 0.09 | 0.13 | -0.1 | 0.17*** | 0.13 | 0.08 | -0.06 | 0.06 | 0.19*** | 0.1* | 0.02 | 0.22* | 0.08 | 0.39*** | 0.2** | 0.3*** | 0.17* | 0.13* | 0.19*** | 0.21*** | 0.38*** | 0.21*** | -0.28** | -0.08 | -0.09 | 0.34** |
| Tfh | CXCR5 | 0.29* | 0.11* | 0.12*** | 0.25*** | 0 | 0.29*** | 0.17 | 0.17* | 0.24** | 0.3*** | 0.07 | 0.1* | 0 | 0.19*** | 0.31*** | 0.24*** | 0.2*** | 0.16 | 0.15* | 0.26** | 0.17* | 0.22*** | 0.17* | 0.12 | 0.18*** | 0.27*** | 0.3*** | 0.18*** | -0.11 | 0 | -0.06 | 0.2 |
|  | ICOS | 0.04 | 0.33*** | 0.14*** | 0.29*** | 0.2 | 0.33*** | 0.18 | 0.4*** | 0.09 | 0.36*** | 0.36** | 0.23*** | 0.17** | 0.36*** | 0.33*** | 0.39*** | 0.2*** | 0.34** | 0.31*** | 0.44*** | 0.34*** | 0.35*** | 0.28** | 0.23*** | 0.37*** | 0.5*** | 0.41*** | 0.29*** | -0.09 | 0.13* | 0.3* | 0.43*** |
|  | BCL-6 | 0.39** | 0.23*** | 0.31*** | 0.3*** | 0.25 | 0.43*** | 0.3 | 0.21** | 0.55*** | 0.27*** | 0.31* | 0.29*** | 0.36*** | 0.4*** | 0.45*** | 0.26*** | 0.17*** | 0.16 | 0.29*** | 0.42*** | 0.41*** | 0.48*** | 0.29*** | 0.26*** | 0.32*** | 0.28*** | 0.74*** | 0.47*** | 0.58*** | 0.19** | 0.2 | 0.62*** |
| TAM | HLA-G | 0.22 | 0.27*** | 0.07* | 0.17** | 0.26 | -0.06 | 0.1 | 0.02 | 0.15 | 0.22*** | 0.17 | 0.1* | 0.22*** | 0.39*** | 0.28*** | 0.28*** | 0.19*** | 0.06 | 0.14* | 0.13 | 0.27*** | 0.27*** | -0.09 | 0.19** | 0.1* | 0.01 | 0.41*** | 0.22*** | 0.37*** | 0.14* | 0.15 | 0.39*** |
|  | CD80 | 0.16 | 0.3*** | 0.26*** | 0.29*** | 0.07 | 0.33*** | 0.51** | 0.34*** | 0.26** | 0.37*** | 0.44*** | 0.36*** | 0.24*** | 0.42*** | 0.53*** | 0.43*** | 0.21*** | 0.32** | 0.32*** | 0.38*** | 0.41*** | 0.39*** | 0.24** | 0.21** | 0.42*** | 0.5*** | 0.38*** | 0.34*** | 0.29** | 0.26*** | 0.43** | 0.45*** |
|  | CD86 | 0.04 | 0.31*** | 0.3*** | 0.25*** | 0.27 | 0.44*** | 0.47** | 0.25** | 0.34*** | 0.37*** | 0.36** | 0.37*** | 0.21** | 0.56*** | 0.49*** | 0.41*** | 0.25*** | 0.24* | 0.41*** | 0.49*** | 0.38*** | 0.44*** | 0.23** | 0.19** | 0.38*** | 0.4*** | 0.5*** | 0.25*** | 0.35*** | 0.2** | 0.37** | 0.45*** |
| Monocyte | CD14 | 0.21 | 0.17** | 0.12*** | 0.07 | 0.01 | 0.37*** | 0.17 | 0.17* | 0.38*** | 0.22*** | 0.19 | 0.2*** | 0.11 | 0.44*** | -0.1 | 0.26*** | 0.21*** | -0.06 | 0.34*** | 0.29*** | 0.27*** | 0.29*** | 0.07 | 0.07 | 0.2*** | 0.36*** | 0.62*** | 0.05 | 0.15 | 0.22*** | 0.19 | 0.31** |
|  | CD16 | 0.19 | 0.16** | 0.28*** | 0.07 | 0.39* | 0.39*** | 0.48** | 0.18* | 0.45*** | 0.21*** | 0.36** | 0.36*** | 0.22*** | 0.48*** | 0.42*** | 0.35*** | 0.14** | 0.16 | 0.39*** | 0.35*** | 0.31*** | 0.42*** | 0.2* | 0.07 | 0.33*** | 0.41*** | 0.46*** | 0.21*** | 0.45*** | 0.26*** | 0.32* | 0.62*** |
| NK | XCL1 | 0.2 | -0.08 | 0.09** | 0.11 | -0.04 | 0.21*** | 0.25 | 0.04 | -0.02 | 0.04 | 0.18 | -0.08 | -0.06 | 0.22*** | 0.1 | 0.01 | -0.03 | 0.16 | 0.09 | 0.26** | 0.06 | 0.2*** | 0.02 | 0.18** | 0.18*** | 0.02 | 0.19* | 0.1* | 0.21* | 0.03 | -0.08 | 0.2 |
|  | KIR3DL1 | 0.05 | 0.03 | 0.09** | 0.12* | -0.02 | 0.15** | 0.24 | 0.17* | 0.07 | 0.21*** | 0.08 | 0.17*** | -0.01 | 0.06 | 0.19*** | 0.06 | 0.15** | 0.1 | 0.17** | 0.2** | 0.06 | 0.16** | 0.1 | 0.26*** | 0.05 | 0.25*** | 0.12 | 0.1* | 0.26** | 0 | 0.26 | 0.33** |
|  | CD7 | 0.14 | 0.18** | -0.04 | 0.16** | -0.24 | 0.35*** | -0.05 | 0.2** | 0.27** | 0.23*** | 0.08 | -0.04 | -0.14* | 0.39*** | 0.05 | 0.08 | 0.22*** | 0.17 | 0.22*** | 0.29*** | 0.17* | 0.23*** | 0.13 | 0.1 | 0.14** | 0.24*** | 0.3*** | 0.11* | -0.49*** | -0.03 | 0.03 | 0.22 |
| Neutrophil | CD15 | 0.43*** | 0.18*** | 0.28*** | 0.1 | 0.21 | 0.29*** | 0.65*** | 0.13 | 0.53*** | 0.4*** | 0.54*** | 0.6*** | 0.5*** | 0.47*** | 0.44*** | 0.27*** | 0.3*** | 0.07 | 0.14* | 0.39*** | 0.58*** | 0.6*** | 0.45*** | 0.31*** | 0.49*** | 0.41*** | 0.27** | 0.6*** | 0.58*** | 0.4*** | 0.38** | 0.7*** |
|  | MPO | 0.08 | 0.05 | 0.16*** | 0.11 | 0.15 | 0.1* | 0.28 | 0.07 | -0.04 | 0.18*** | 0.19 | 0.23*** | 0.05 | -0.26*** | 0.2*** | 0.17*** | 0.03 | 0.18 | 0.08 | 0.35*** | 0.1 | 0.19*** | 0.02 | 0.27*** | 0.2*** | 0.26*** | 0.11 | 0.1* | -0.11 | 0.03 | 0.12 | 0.11 |
| DC | CD1C | 0.25* | 0.3*** | 0.24*** | 0.32*** | 0.3 | 0.28*** | 0.19 | 0.19* | -0.01 | 0.25*** | 0.19 | 0.35*** | 0.31*** | 0.33*** | 0.36*** | 0.3*** | 0.15** | 0.31** | 0.19** | 0.43*** | 0.31*** | 0.42*** | 0.09 | 0.28*** | 0.33*** | 0.2*** | 0.67*** | 0.28*** | -0.22* | 0.18** | 0.15 | 0.01 |
|  | CD141 | 0.41*** | 0.26*** | 0.26*** | 0.2** | 0.36* | 0.48*** | 0.26 | 0.14 | 0.33*** | 0.06 | 0.12 | 0.39*** | 0.4*** | 0.21*** | 0.45*** | 0.25*** | 0.13** | 0.05 | 0.26*** | 0.33*** | 0.35*** | 0.3*** | 0.17 | 0.22** | 0.26*** | 0.19*** | 0.68*** | 0.32*** | 0.41*** | 0.1 | 0.04 | 0.56*** |
| Treg | FOXP3 | 0.01 | 0.35*** | 0.17*** | 0.37*** | 0.23 | 0.41*** | 0.28 | 0.37*** | 0.4*** | 0.44*** | 0.12 | 0.04 | 0.13* | 0.05 | 0.29*** | 0.4*** | 0.33*** | 0.24* | 0.35*** | 0.47*** | 0.22** | 0.42*** | 0.26** | 0.27*** | 0.21*** | 0.46*** | 0.31*** | 0.27*** | 0.46*** | 0.13* | 0.44** | 0.24* |
|  | CCR8 | 0.17 | 0.42*** | 0.27*** | 0.48*** | 0.19 | 0.46*** | 0.49** | 0.38*** | 0.16 | 0.52*** | 0.45*** | 0.24*** | 0.19** | 0.18*** | 0.57*** | 0.49*** | 0.34*** | 0.46*** | 0.32*** | 0.55*** | 0.23** | 0.53*** | 0.34*** | 0.37*** | 0.48*** | 0.49*** | 0.14 | 0.43*** | 0.47*** | 0.34*** | 0.47*** | 0.4*** |
|  | CD25 | 0.19 | 0.2*** | -0.05 | 0.01 | -0.21 | 0.19*** | -0.24 | 0.1 | 0.13 | 0.02 | 0.15 | -0.03 | -0.02 | 0.21*** | 0.01 | -0.13** | 0.05 | 0.26* | 0.13* | 0.06 | 0.21** | -0.07 | -0.01 | 0.2** | 0.11* | 0.24*** | 0.29*** | 0.02 | -0.48*** | 0.02 | -0.07 | 0.41*** |
| T cell exhaustion | PD-1 | -0.09 | 0.18*** | 0.01 | 0.09 | 0.22 | 0.32*** | 0.19 | 0.25** | 0.17* | 0.21*** | 0.15 | 0.04 | 0.01 | 0.42*** | 0.22*** | 0.22*** | 0.18*** | 0.11 | 0.23*** | 0.31*** | 0.24** | 0.26*** | 0.12 | 0.14* | 0.15** | 0.42*** | 0.17* | 0.09 | -0.28** | -0.1 | 0.11 | 0.34** |
|  | CTLA4 | 0.06 | 0.23*** | 0.05 | 0.16** | 0.22 | 0.37*** | 0.02 | 0.34*** | 0.2* | 0.25*** | 0.31* | 0.13** | -0.01 | 0.17*** | 0.18** | 0.3*** | 0.17*** | 0.2 | 0.31*** | 0.37*** | 0.19* | 0.22*** | 0.22** | 0.15* | 0.28*** | 0.39*** | 0.25** | 0.19*** | 0.1 | 0.01 | 0.17 | 0.31** |
| Macrophage | CD68 | 0.32** | 0.36*** | 0.26*** | 0.32*** | 0.08 | 0.37*** | 0.35* | 0.21** | 0.46*** | 0.3*** | 0.4** | 0.25*** | 0.29*** | 0.56*** | 0.39*** | 0.36*** | 0.21*** | 0.2 | 0.44*** | 0.48*** | 0.47*** | 0.37*** | 0.22* | 0.07 | 0.24*** | 0.37*** | 0.6*** | 0.29*** | 0.29** | 0.36*** | 0.27* | 0.08 |
|  | CD11b | 0.29* | 0.24*** | 0.46*** | 0.35*** | 0.45** | 0.45*** | 0.29 | 0.35*** | 0.62*** | 0.37*** | 0.3* | 0.44*** | 0.26*** | 0.52*** | 0.48*** | 0.5*** | 0.41*** | 0.21 | 0.54*** | 0.53*** | 0.49*** | 0.46*** | 0.23** | 0.19** | 0.4*** | 0.56*** | 0.42*** | 0.27*** | 0.25** | 0.34*** | 0.32* | 0.38** |
| M1 | NOS2 | 0.35** | 0.18** | 0.12*** | 0.03 | 0.52** | 0.08 | 0.29 | 0.08 | 0.2* | 0.22*** | 0.17 | 0.48*** | 0.25*** | -0.04 | 0.25*** | 0.03 | 0.06 | 0.04 | 0.11 | 0.29*** | 0.34*** | 0.41*** | 0.29** | 0.25*** | -0.01 | 0.11* | 0.47*** | 0.29*** | 0.08 | 0.15** | 0.28* | 0.22 |
|  | ROS | 0.06 | 0.17** | 0.12*** | 0.06 | -0.09 | 0.08 | 0.4* | 0.06 | 0.1 | 0.18*** | -0.09 | -0.07 | 0.08 | -0.16*** | 0.24*** | 0.45*** | 0.21*** | 0.13 | 0.08 | 0.24** | 0.03 | 0.4*** | 0.13 | 0 | 0.15** | 0.08 | 0.49*** | 0.24*** | 0.06 | 0.18** | 0.19 | -0.18 |
| M2 | ARG1 | 0.29* | 0.1 | 0.07* | 0.16** | -0.21 | 0 | 0.11 | -0.07 | -0.07 | -0.09 | -0.06 | 0.09 | 0.12 | -0.06 | -0.17** | 0.11* | -0.01 | 0.1 | 0.02 | 0.1 | 0.11 | 0.1* | 0.05 | 0.06 | 0.02 | 0.07 | 0.21* | 0.06 | 0.22* | 0.02 | 0.11 | 0.22 |
|  | MRC1 | 0.23 | 0.2*** | 0.27*** | 0.19** | 0.25 | 0.34*** | 0.4** | 0.21** | 0.36*** | 0.3*** | 0.33** | 0.57*** | 0.28*** | 0.14** | 0.23*** | 0.44*** | 0.24*** | 0.29** | 0.36*** | 0.46*** | 0.53*** | 0.46*** | 0.2* | 0.19** | 0.36*** | 0.43*** | 0.66*** | 0.37*** | 0.42*** | 0.27*** | 0.24 | 0.52*** |
| *P < 0.05, **P < 0.01, ***P < 0.001. | | | | | | | | | | | | | | | | | | | | | | | | | | | | | | | | | |

| Table S15. The correlation between CASP3 expression and immune cells related gene markers across 32 human tumors. (TIMER database). | | | | | | | | | | | | | | | | | | | | | | | | | | | | | | | | | |
| --- | --- | --- | --- | --- | --- | --- | --- | --- | --- | --- | --- | --- | --- | --- | --- | --- | --- | --- | --- | --- | --- | --- | --- | --- | --- | --- | --- | --- | --- | --- | --- | --- | --- |
| Cell Type | Gene Marker | ACC | BLCA | BRCA | CESC | CHOL | COAD | DLBC | ESCA | GBM | HNSC | KICH | KIRC | KIRP | LGG | LIHC | LUAD | LUSC | MESO | OV | PAAD | PCPG | PRAD | READ | SARC | SKCM | STAD | TGCT | THCA | THYM | UCEC | UCS | UVM |
| Th1 | IL12RB2 | 0.05 | -0.01 | 0.22*** | -0.03 | -0.09 | 0.11* | 0.46** | 0.06 | -0.03 | 0.01 | 0.11 | 0.16*** | 0.22*** | -0.01 | 0.26*** | 0.31*** | 0.03 | 0.15 | 0.25*** | 0.1 | 0.14 | 0.39*** | 0.17* | 0.21** | 0.04 | 0.24*** | 0.35*** | 0.48*** | 0.15 | 0.24*** | 0.27 | 0.03 |
|  | WSX-1 | 0.3* | -0.05 | 0.03 | 0.19** | 0.12 | 0.21*** | 0.17 | 0.13 | 0.22** | 0.31*** | 0.36** | 0.13** | 0.21** | 0.17*** | 0.45*** | -0.06 | 0.07 | 0.18 | 0.12 | 0.22** | 0.15* | 0.25*** | 0.16 | -0.05 | 0.29*** | 0.03 | 0.15 | 0.39*** | 0.57*** | 0.02 | -0.01 | 0.51*** |
|  | T-BET | 0.01 | 0.04 | 0.12*** | 0.09 | 0 | 0.25*** | 0.29 | 0.23** | -0.14 | 0.31*** | 0.25* | 0.19*** | 0.14* | 0.28*** | 0.27*** | 0.12** | 0.14** | 0.21 | 0.14* | 0.09 | 0.1 | 0.3*** | -0.08 | 0.08 | 0.26*** | 0.07 | -0.01 | 0.38*** | 0.1 | -0.02 | 0.03 | 0.37** |
| Th2 | CCR3 | -0.06 | 0.1 | 0.14*** | 0.05 | 0.26 | 0.12* | 0.17 | 0.03 | 0 | 0.12* | 0.25* | 0.28*** | 0.26*** | 0.16*** | 0.28*** | 0.05 | 0.04 | 0.03 | 0.09 | 0.25** | 0.15* | 0.24*** | -0.11 | 0.05 | 0.31*** | 0.24*** | 0.28** | 0.28*** | 0.11 | -0.05 | 0.12 | 0.33** |
|  | STAT6 | 0.05 | 0.35*** | 0.11** | 0.47*** | 0.22 | -0.08 | 0.67*** | 0.35*** | -0.06 | 0.4*** | 0.3* | 0.06 | 0.31*** | 0.16*** | 0.28*** | -0.01 | 0.28*** | 0.2 | 0.17** | 0.33*** | 0.14 | 0.19*** | 0.02 | -0.06 | 0.2*** | 0.2*** | 0.21** | 0.5*** | 0.52*** | 0.14* | 0.11 | 0.24* |
|  | GATA-3 | 0.37** | 0.16** | 0.06 | 0.05 | -0.12 | 0.03 | 0.34* | 0.03 | 0.15 | 0.07 | 0.01 | 0.13** | 0.18** | 0.31*** | 0.4*** | 0.2*** | 0.1* | 0.17 | 0.08 | 0.17* | 0.09 | 0.15** | -0.17* | -0.02 | 0.23*** | -0.19*** | 0.22** | 0.29*** | 0.45*** | 0.06 | 0.12 | 0.45*** |
| Th9 | TGFBR2 | 0.13 | 0.2*** | 0.31*** | 0.33*** | 0.31 | 0.13** | 0.63*** | 0.19* | 0 | 0.13** | 0.07 | 0.24*** | 0.48*** | 0.32*** | 0.4*** | 0.02 | 0.1* | 0.1 | 0.13* | 0.36*** | 0.23** | 0.35*** | 0.27** | 0.26*** | 0.37*** | -0.05 | 0.2* | 0.43*** | 0.51*** | 0.38*** | 0.34* | 0.57*** |
|  | IRF4 | 0.1 | 0.06 | 0.24*** | 0.21*** | 0.18 | 0.15** | 0.49** | 0.36*** | -0.18* | 0.4*** | 0.41** | 0.45*** | 0.18** | 0.04 | 0.36*** | 0.1* | 0.12* | -0.05 | 0.15* | 0.24** | 0.3*** | 0.42*** | 0.04 | 0.13* | 0.06 | 0.13* | -0.01 | 0.21*** | -0.15 | 0.1 | 0.14 | 0.27* |
|  | PU.1 | 0.03 | -0.05 | 0.02 | 0 | -0.03 | 0.05 | 0.16 | 0.05 | -0.17* | 0.32*** | 0.21 | 0.29*** | 0.02 | 0.21*** | 0.44*** | 0.02 | 0.11* | 0.13 | 0.01 | 0.1 | 0.22** | 0.27*** | -0.29*** | 0.1 | 0.16** | 0.01 | 0.01 | 0.35*** | -0.03 | -0.18** | 0.03 | 0.14 |
| Th17 | IL-21 R | 0.16 | 0.05 | 0.23*** | 0.14* | 0.19 | 0.13** | 0.52*** | 0.28*** | -0.07 | 0.35*** | 0.37** | 0.43*** | 0.19** | 0.17*** | 0.44*** | 0.23*** | 0.21*** | 0.16 | 0.15* | 0.24** | 0.07 | 0.35*** | -0.2* | 0.21** | 0.34*** | 0.14** | 0.14 | 0.44*** | 0.2* | -0.02 | 0.19 | 0.29** |
|  | IL-23R | 0.19 | 0.08 | 0.2*** | 0.19** | 0.23 | 0.2*** | -0.14 | 0.36*** | -0.12 | 0.25*** | 0.12 | 0.19*** | 0.33*** | 0.14** | 0.28*** | 0.17*** | 0.11* | -0.12 | 0.08 | 0.44*** | -0.03 | 0.18*** | 0.28** | 0.12 | 0.26*** | 0.22*** | 0.18* | 0.27*** | 0.09 | 0.07 | 0.02 | 0.4*** |
|  | STAT3 | 0.3** | 0.37*** | 0.24*** | 0.49*** | 0.22 | 0.38*** | 0.5** | 0.39*** | 0.25** | 0.4*** | 0.36** | 0.42*** | 0.46*** | 0.5*** | 0.43*** | 0.17*** | 0.31*** | 0.28* | 0.21** | 0.43*** | 0.26** | 0.53*** | 0.33*** | 0.23*** | 0.34*** | 0.26*** | 0.37*** | 0.56*** | 0.52*** | 0.45*** | 0.27 | 0.6*** |
| Th22 | CCR10 | 0.33** | -0.07 | -0.18*** | 0.2** | 0.26 | -0.17** | 0.21 | 0.12 | -0.03 | 0.3*** | -0.08 | 0 | 0.05 | 0.02 | 0.36*** | 0 | -0.03 | -0.17 | 0.22*** | -0.16* | 0.13 | -0.13** | -0.34*** | 0.07 | 0.1* | -0.24*** | -0.01 | 0.05 | -0.06 | -0.07 | -0.09 | 0.31** |
|  | AHR | 0.02 | 0.31*** | 0.31*** | 0.21*** | 0.45** | 0.44*** | 0.56*** | 0.19* | 0.12 | 0.25*** | 0.36** | 0.38*** | 0.43*** | 0.38*** | 0.26*** | 0.13** | 0.08 | -0.13 | 0.08 | 0.5*** | 0.22** | 0.44*** | 0.39*** | 0.15* | 0.52*** | 0.27*** | 0.13 | 0.49*** | 0.41*** | 0.39*** | 0.22 | 0.88*** |
| Bcell | CD19 | -0.01 | -0.04 | 0.05 | 0.12 | 0.04 | 0.01 | 0.02 | 0.25** | 0.11 | 0.31*** | 0.16 | 0.29*** | 0.03 | 0.19*** | 0.25*** | 0.02 | 0.1* | -0.19 | 0.19** | 0.13 | 0.09 | 0.09 | -0.05 | -0.14* | 0.21*** | -0.05 | -0.15 | 0.26*** | -0.19* | -0.1 | 0.01 | 0.08 |
|  | CD20 | -0.03 | 0.1 | 0.14*** | 0.22*** | 0.14 | 0.15** | 0.05 | 0.19* | 0.22** | 0.15** | 0 | 0.05 | 0 | 0.05 | 0.19*** | 0.1* | 0.14** | -0.07 | -0.07 | 0.22** | 0.09 | 0.2*** | 0.35*** | 0.09 | 0.03 | 0.05 | 0.06 | 0.05 | 0.3** | 0.17** | 0.06 | -0.03 |
|  | CD38 | 0.03 | 0.08 | 0.25*** | 0.07 | 0.01 | 0.25*** | 0.4* | 0.15* | -0.03 | 0.34*** | 0.31* | 0.47*** | 0.25*** | 0.26*** | 0.3*** | 0.08 | 0.13** | 0.3** | 0.23*** | 0.27*** | 0.16* | -0.18*** | 0.17* | 0.15* | 0.41*** | 0.16** | -0.07 | 0.36*** | 0.48*** | 0.17** | 0.11 | 0.45*** |
| CD8+ T Cell | CD8A | 0 | 0.06 | 0.18*** | 0.14* | -0.09 | 0.29*** | 0.36* | 0.22** | -0.11 | 0.33*** | 0.33** | 0.32*** | 0.16** | 0.22*** | 0.36*** | 0.18*** | 0.18*** | 0.14 | 0.2** | 0.16* | 0.3*** | 0.34*** | -0.04 | 0.1 | 0.25*** | 0 | -0.03 | 0.36*** | 0.37*** | 0.06 | 0.1 | 0.39*** |
|  | CD8B | -0.02 | 0.06 | 0.05 | 0.24*** | 0.03 | 0.12* | 0.06 | 0.2** | -0.05 | 0.31*** | 0.17 | 0.25*** | 0.11 | 0.1* | 0.24*** | 0.2*** | 0.15** | 0.14 | 0.2** | 0.16* | 0.06 | 0.27*** | -0.05 | 0.06 | 0.2*** | 0 | -0.03 | 0.36*** | 0.27** | -0.09 | -0.05 | 0.34** |
| Tfh | CXCR5 | 0.16 | 0.04 | 0.1** | 0.1 | 0.01 | 0.05 | 0.18 | 0.21** | -0.04 | 0.32*** | 0.21 | 0.27*** | 0.1 | 0.11* | 0.3*** | 0.02 | 0.16*** | 0.01 | 0.07 | 0.05 | 0.07 | 0.24*** | -0.03 | -0.04 | 0.18*** | -0.11* | -0.06 | 0.32*** | -0.13 | -0.02 | -0.04 | 0.29* |
|  | ICOS | -0.08 | 0.06 | 0.32*** | 0.13* | 0.04 | 0.34*** | 0.27 | 0.32*** | -0.04 | 0.33*** | 0.39** | 0.42*** | 0.26*** | 0.33*** | 0.39*** | 0.22*** | 0.19*** | 0.1 | 0.22*** | 0.19* | 0.15* | 0.39*** | 0.17 | 0.15* | 0.43*** | 0.31*** | 0.24** | 0.43*** | 0.44*** | 0.13* | 0.18 | 0.5*** |
|  | BCL-6 | 0.23 | 0.32*** | 0.02 | 0.29*** | 0.5** | 0.1* | 0.26 | -0.03 | -0.05 | 0.38*** | 0.26* | 0.2*** | 0.47*** | -0.05 | 0.26*** | -0.04 | 0.12* | -0.01 | 0.05 | 0.28*** | 0.34*** | 0.23*** | 0.02 | 0.24*** | 0.23*** | -0.09 | 0.02 | 0.32*** | 0.59*** | 0.08 | 0.23 | 0.5*** |
| TAM | HLA-G | 0.21 | 0.04 | -0.04 | 0.14* | 0.15 | -0.11* | -0.07 | 0 | 0.07 | 0.17*** | 0.16 | 0.1* | 0.11 | 0.2*** | 0.25*** | 0.16*** | 0.03 | 0.21 | 0.11 | 0.18* | 0.12 | 0.21*** | -0.25** | 0.14* | 0.04 | 0.22*** | 0.36*** | 0.3*** | 0.09 | -0.16** | 0.17 | 0.36** |
|  | CD80 | 0.09 | 0.03 | 0.38*** | 0.06 | -0.18 | 0.24*** | 0.32* | 0.22** | 0.07 | 0.31*** | 0.35** | 0.51*** | 0.28*** | 0.28*** | 0.42*** | 0.16*** | 0.13** | 0.25* | 0.22*** | 0.23** | 0.19* | 0.42*** | 0 | 0.23*** | 0.48*** | 0.3*** | 0.33*** | 0.4*** | 0.13 | 0.18** | 0.06 | 0.4*** |
|  | CD86 | 0.01 | 0.06 | 0.29*** | 0.03 | -0.1 | 0.32*** | 0.43** | 0.07 | -0.08 | 0.32*** | 0.34** | 0.45*** | 0.13* | 0.24*** | 0.41*** | 0.2*** | 0.17*** | 0.2 | 0.14* | 0.23** | 0.28*** | 0.41*** | 0.07 | 0.15* | 0.44*** | 0.18*** | 0.12 | 0.44*** | 0.18 | 0.05 | 0.14 | 0.53*** |
| Monocyte | CD14 | -0.03 | -0.11* | -0.06* | -0.18** | -0.31 | 0.09 | -0.05 | -0.02 | -0.04 | 0.17*** | 0.21 | 0.29*** | -0.01 | 0.13** | -0.19*** | 0.12** | 0.08 | 0.1 | 0.03 | 0.07 | 0.22** | 0.17** | -0.34*** | 0.06 | 0.22*** | 0.08 | 0.05 | 0.19*** | -0.05 | -0.13* | 0.03 | 0.29* |
|  | CD16 | 0.14 | 0 | 0.31*** | -0.09 | 0.14 | 0.25*** | 0.17 | 0.03 | -0.05 | 0.29*** | 0.4** | 0.46*** | 0.1 | 0.3*** | 0.38*** | 0.2*** | 0.13** | 0.26* | 0.18** | 0.22** | 0.22** | 0.44*** | -0.04 | 0.12 | 0.41*** | 0.19*** | 0.27** | 0.41*** | 0.31** | 0.2*** | 0.08 | 0.65*** |
| NK | XCL1 | -0.14 | 0.05 | 0.14*** | 0.02 | -0.1 | 0.18*** | 0.35* | -0.09 | -0.04 | 0.17*** | 0.33** | 0.19*** | 0.07 | 0.26*** | 0.24*** | 0.15** | 0.12* | 0.26* | 0.17** | 0.14 | 0.11 | 0.17** | -0.07 | 0.14* | 0.26*** | -0.01 | -0.2* | 0.28*** | 0.22* | -0.05 | -0.02 | 0.22 |
|  | KIR3DL1 | 0.01 | 0.01 | 0.11*** | -0.02 | 0.09 | 0.09 | 0.11 | 0.17* | 0.06 | 0.22*** | -0.05 | -0.01 | 0.03 | 0.09 | 0.13* | 0.06 | 0.08 | 0.1 | 0.11 | 0.09 | 0.09 | 0.14** | -0.03 | 0.09 | 0.06 | 0.18*** | 0.07 | 0.25*** | 0.06 | -0.04 | 0.36** | 0.22 |
|  | CD7 | 0.04 | 0.01 | -0.01 | 0.01 | -0.1 | 0.14** | 0.11 | 0.18* | -0.07 | 0.31*** | 0.24 | 0.13** | 0.1 | 0.21*** | 0.23*** | 0.08 | 0.15** | 0.17 | 0.14* | 0.13 | 0.15 | 0.16** | -0.18* | -0.01 | 0.13** | 0.05 | -0.03 | 0.29*** | -0.07 | -0.15* | 0.09 | 0.21 |
| Neutrophil | CD15 | 0.53*** | 0.13* | 0.27*** | 0.25*** | 0.2 | 0.36*** | 0.66*** | 0.39*** | 0.12 | 0.4*** | 0.41** | 0.49*** | 0.32*** | 0.31*** | 0.46*** | 0.32*** | 0.11* | 0.04 | 0.22** | 0.5*** | 0.37*** | 0.4*** | 0.38*** | 0.28*** | 0.47*** | 0.43*** | 0.13 | 0.66*** | 0.7*** | 0.43*** | 0.26 | 0.74*** |
|  | MPO | 0.11 | 0.01 | 0.07* | 0.09 | 0.25 | -0.07 | 0.04 | -0.03 | -0.03 | 0.18*** | 0 | 0.3*** | 0.02 | 0 | 0.11* | 0.17*** | 0.06 | 0.02 | 0.26*** | 0.15 | 0.11 | 0.05 | -0.17* | 0.12 | 0.21*** | 0.01 | -0.01 | 0.13** | -0.12 | 0 | 0.16 | 0.01 |
| DC | CD1C | 0.03 | 0.09 | 0 | 0.23*** | -0.1 | 0.12* | 0.2 | 0.03 | 0.06 | 0.22*** | 0.08 | 0.18*** | 0.28*** | 0.09 | 0.34*** | -0.11* | 0.11* | -0.09 | -0.09 | 0.15* | 0.22** | 0.32*** | -0.16 | 0.08 | 0.29*** | -0.11* | -0.08 | 0.33*** | 0.32*** | -0.07 | 0.21 | 0.02 |
|  | CD141 | 0.27* | 0.02 | -0.02 | -0.18** | 0.26 | 0.11* | 0.42** | -0.16* | 0.12 | -0.15** | 0.02 | 0.31*** | 0.32*** | 0.14** | 0.22*** | -0.01 | -0.06 | 0.03 | 0.21** | 0.11 | 0.19* | 0.15** | -0.26** | 0.22** | 0.16** | -0.07 | 0.12 | 0.24*** | -0.07 | 0.08 | 0.19 | 0.57*** |
| Treg | FOXP3 | 0.01 | 0.18** | 0.29*** | 0.19** | 0.08 | 0.09 | 0.25 | 0.33*** | -0.05 | 0.38*** | 0.08 | 0.25*** | 0.26*** | 0.23*** | 0.34*** | 0.15** | 0.22*** | 0.24* | 0.28*** | 0.21** | 0.36*** | 0.41*** | -0.18* | 0.15* | 0.16** | 0.2*** | 0.22** | 0.4*** | 0.24* | 0.05 | 0.29* | 0.21 |
|  | CCR8 | 0.05 | 0.21*** | 0.44*** | 0.31*** | 0.12 | 0.24*** | 0.4* | 0.29*** | -0.09 | 0.37*** | 0.34** | 0.34*** | 0.21** | 0.22*** | 0.57*** | 0.22*** | 0.24*** | 0.35** | 0.18** | 0.32*** | 0.1 | 0.47*** | 0.03 | 0.29*** | 0.43*** | 0.2*** | 0.5*** | 0.44*** | 0.71*** | 0.21*** | 0.22 | 0.42*** |
|  | CD25 | 0.36** | 0.01 | -0.06 | 0.04 | -0.17 | 0.12* | -0.06 | 0.22** | 0.01 | 0.2*** | 0.25* | 0.16** | 0.14* | 0.23*** | 0.07 | 0.06 | 0.18*** | 0.32** | 0.12 | 0.3*** | 0.04 | -0.09 | -0.09 | 0.13* | 0.05 | 0.09 | 0.04 | 0.16*** | -0.25** | -0.05 | -0.04 | 0.47*** |
| T cell exhaustion | PD-1 | -0.02 | 0.03 | 0.06* | 0.02 | 0.1 | 0.15** | 0.25 | 0.2** | -0.23** | 0.33*** | 0.3* | 0.25*** | 0.09 | 0.25*** | 0.36*** | 0.18*** | 0.16** | 0.09 | 0.16* | 0.11 | 0.15* | 0.28*** | -0.1 | 0.04 | 0.19*** | 0.03 | -0.11 | 0.31*** | 0.23* | -0.07 | -0.01 | 0.37** |
|  | CTLA4 | -0.07 | 0.02 | 0.23*** | 0.04 | 0.2 | 0.23*** | 0.16 | 0.3*** | -0.19* | 0.32*** | 0.3* | 0.32*** | 0.16* | 0.18*** | 0.32*** | 0.14** | 0.17*** | 0.03 | 0.19** | 0.12 | 0.15 | 0.27*** | 0.06 | 0.09 | 0.23*** | 0.21*** | -0.04 | 0.36*** | -0.2* | -0.01 | 0.24 | 0.39*** |
| Macrophage | CD68 | 0.15 | 0.03 | 0.27*** | 0.11 | -0.04 | 0.07 | 0.14 | 0.14 | -0.14 | 0.2*** | 0.39** | 0.29*** | 0.17** | 0.24*** | 0.3*** | 0.13** | 0.06 | 0.31** | 0.2** | 0.35*** | 0.17* | 0.35*** | -0.1 | 0.14* | 0.11* | 0.2*** | 0.16* | 0.43*** | 0.14 | 0.04 | 0.07 | -0.11 |
|  | CD11b | 0.05 | 0.06 | 0.21*** | 0.18** | -0.14 | 0.06 | -0.05 | 0.22** | -0.03 | 0.38*** | 0.35** | 0.35*** | 0.16* | 0.21*** | 0.39*** | 0.06 | 0.17*** | 0.2 | 0.15* | 0.33*** | 0.31*** | 0.34*** | -0.19* | 0.11 | 0.31*** | 0.13** | 0.2* | 0.41*** | 0.36*** | -0.1 | 0.22 | 0.3** |
| M1 | NOS2 | 0.18 | 0.21*** | 0.06 | 0.25*** | 0.15 | 0.09 | 0.25 | 0.3*** | 0.42*** | 0.44*** | 0.03 | 0.18*** | 0.12 | 0.17*** | 0.16** | 0.02 | 0.2*** | 0.11 | 0.22*** | 0.32*** | 0.5*** | 0.2*** | 0.18* | 0.05 | 0.01 | 0.22*** | 0.31*** | 0.22*** | 0.21* | 0.14* | 0.12 | 0.12 |
|  | ROS | 0.13 | -0.01 | 0.23*** | 0.15* | 0.42* | 0.09 | 0.01 | -0.01 | 0.13 | 0.05 | 0.03 | 0.11* | 0.12* | 0.01 | 0.31*** | -0.09 | -0.07 | -0.02 | 0.11 | 0.2** | 0.08 | 0.45*** | 0.13 | 0.19** | 0.08 | 0.15** | 0.01 | 0.27*** | 0.03 | 0.13* | 0.14 | -0.09 |
| M2 | ARG1 | 0.17 | 0.01 | 0.07* | 0.12 | -0.22 | 0.1* | 0.15 | -0.09 | 0.12 | -0.21*** | 0.05 | 0.07 | 0.16* | 0.02 | -0.02 | 0.04 | -0.01 | -0.18 | 0.08 | 0.03 | -0.06 | 0.14** | 0.08 | 0.02 | 0.02 | 0.16** | 0.12 | -0.01 | -0.06 | 0.06 | 0.06 | 0.18 |
|  | MRC1 | 0.06 | 0.01 | 0.27*** | 0.01 | 0.18 | 0.18*** | 0.35* | 0.07 | 0.05 | 0.19*** | 0.19 | 0.31*** | 0.21** | -0.24*** | 0.13* | 0 | 0.08 | 0.25* | 0.28*** | 0.23** | 0.24** | 0.34*** | -0.11 | 0.13* | 0.42*** | 0.19*** | 0.07 | 0.41*** | 0.02 | 0.18** | 0.12 | 0.54*** |
| *P < 0.05, **P < 0.01, ***P < 0.001. | | | | | | | | | | | | | | | | | | | | | | | | | | | | | | | | | |
| Table S16. The correlation between PARP1 expression and immune cells related gene markers across 32 human tumors. (TIMER database). | | | | | | | | | | | | | | | | | | | | | | | | | | | | | | | | | |
| Cell Type | Gene Marker | ACC | BLCA | BRCA | CESC | CHOL | COAD | DLBC | ESCA | GBM | HNSC | KICH | KIRC | KIRP | LGG | LIHC | LUAD | LUSC | MESO | OV | PAAD | PCPG | PRAD | READ | SARC | SKCM | STAD | TGCT | THCA | THYM | UCEC | UCS | UVM |
| Th1 | IL12RB2 | 0.36** | 0.27*** | 0.26*** | 0.01 | 0.24 | 0.32*** | 0.27 | 0.21** | 0.27** | 0 | -0.03 | 0.19*** | -0.04 | 0.07 | 0.21*** | 0.39*** | 0.03 | 0.19 | 0.29*** | 0.18* | 0.11 | 0.4*** | 0.36*** | 0.01 | 0.2*** | 0.42*** | 0.28** | 0.44*** | 0.52*** | 0.27*** | 0.45** | 0 |
|  | WSX-1 | 0.35** | 0.26*** | 0.13*** | 0.13* | 0.21 | 0.32*** | 0.15 | 0.2** | 0.07 | 0.4*** | 0.27* | 0.16** | 0.28*** | 0.08 | 0.48*** | 0.1* | 0.17*** | 0.31** | 0.18** | 0.3*** | 0.16* | 0.26*** | 0.25** | 0 | 0.11* | 0.28*** | -0.18* | 0.14** | 0.23* | 0.12* | 0 | 0.24* |
|  | T-BET | 0.02 | 0.16** | 0.12*** | 0.07 | -0.15 | 0.28*** | -0.22 | 0 | 0.13 | 0.25*** | 0.11 | 0.11* | -0.02 | 0.09* | 0.13* | 0.13** | 0.22*** | -0.03 | 0.05 | 0.19* | 0.1 | 0.2*** | 0.18* | -0.05 | 0.16*** | 0.22*** | -0.03 | 0.15** | 0.13 | -0.24*** | -0.02 | 0.32** |
| Th2 | CCR3 | -0.06 | 0.02 | 0.07* | 0.08 | 0.26 | 0.07 | 0.28 | 0.12 | -0.01 | 0.12** | 0.18 | 0.22*** | 0.13* | -0.01 | 0.34*** | -0.05 | 0 | 0.23* | -0.06 | 0.21** | 0.06 | 0.2*** | -0.09 | -0.02 | 0.12** | 0.17** | -0.04 | 0.01 | 0.14 | -0.08 | -0.21 | 0.2 |
|  | STAT6 | 0.12 | 0.15** | 0.19*** | 0.34*** | 0.46** | 0.24*** | 0.49** | 0.22** | 0.22* | 0.43*** | 0.25* | 0.33*** | 0.34*** | 0.03 | 0.33*** | 0.15** | 0.11* | 0.3** | 0.26*** | 0.32*** | 0.09 | 0.24*** | 0.08 | 0.07 | 0.24*** | 0.27*** | -0.38*** | 0.35*** | 0.39*** | 0.18** | -0.03 | 0.54*** |
|  | GATA-3 | 0.25* | -0.08 | 0.07* | -0.05 | -0.24 | 0.14** | 0.07 | -0.01 | 0.05 | 0.09* | 0.1 | 0.01 | 0.26*** | 0.02 | 0.22*** | 0.13** | 0.07 | 0.12 | 0.1 | 0.09 | 0.3*** | 0.11* | 0.1 | 0.02 | 0.05 | 0.04 | -0.23** | 0.01 | -0.06 | 0 | -0.19 | 0.28* |
| Th9 | TGFBR2 | 0.35** | 0.25*** | 0.14*** | 0.31*** | 0.05 | 0.28*** | 0.42** | 0.02 | 0.26** | 0.19*** | 0.37** | 0.38*** | 0.65*** | 0.24*** | 0.35*** | 0.09 | -0.01 | 0.18 | 0.08 | 0.41*** | 0.44*** | 0.37*** | 0.54*** | -0.06 | 0.21*** | 0.11* | -0.17* | 0.6*** | 0.42*** | 0.34*** | 0.08 | 0.6*** |
|  | IRF4 | 0.22 | 0.14** | 0.17*** | 0.2** | 0.19 | 0.12* | -0.01 | 0.08 | 0.19* | 0.39*** | 0.22 | 0.33*** | 0.2** | 0.02 | 0.22*** | 0.23*** | 0.21*** | 0.01 | 0.13* | 0.31*** | 0.21** | 0.32*** | 0.24** | 0.12 | 0.17*** | 0.23*** | 0.13 | 0.18*** | 0.37*** | -0.11 | 0.18 | 0.37** |
|  | PU.1 | 0 | 0.15** | 0.04 | 0.07 | -0.01 | 0.16** | 0.25 | 0.12 | 0.08 | 0.32*** | -0.06 | 0.24*** | -0.02 | -0.02 | 0.42*** | 0.01 | 0.12* | 0.01 | -0.02 | 0.09 | 0.03 | 0.16** | 0.04 | -0.18** | 0.07 | 0.12* | -0.28** | 0.03 | 0.01 | -0.22*** | -0.26 | 0.28* |
| Th17 | IL-21 R | 0.19 | 0.23*** | 0.19*** | 0.17** | 0.17 | 0.22*** | 0.44** | 0.18* | 0.07 | 0.36*** | 0.35** | 0.37*** | 0.32*** | 0.05 | 0.35*** | 0.25*** | 0.25*** | 0.17 | 0.09 | 0.27*** | 0.16* | 0.28*** | 0.18* | 0.07 | 0.18*** | 0.35*** | 0.08 | 0.23*** | 0.28** | -0.11 | -0.01 | 0.4*** |
|  | IL-23R | 0.32** | -0.06 | 0.18*** | 0.08 | -0.04 | -0.08 | 0.11 | 0.05 | 0 | 0.27*** | 0.06 | 0.24*** | 0.28*** | 0.05 | 0.29*** | 0.14** | 0.09 | 0.07 | 0.05 | 0.32*** | -0.11 | 0.21*** | 0.02 | 0.03 | 0.19*** | 0.21*** | 0.15 | 0.16*** | 0.25** | -0.04 | 0.19 | 0.35** |
|  | STAT3 | 0.55*** | 0.45*** | 0.4*** | 0.45*** | 0.49** | 0.5*** | 0.28 | 0.26** | 0.43*** | 0.47*** | 0.75*** | 0.67*** | 0.69*** | 0.45*** | 0.39*** | 0.47*** | 0.34*** | 0.46*** | 0.33*** | 0.48*** | 0.52*** | 0.61*** | 0.51*** | 0.21** | 0.32*** | 0.36*** | 0.06 | 0.51*** | 0.61*** | 0.49*** | 0.38** | 0.72*** |
| Th22 | CCR10 | 0.33** | 0.01 | -0.19*** | 0.14* | 0.21 | -0.2*** | -0.09 | 0.1 | 0.1 | 0.29*** | -0.06 | -0.13** | 0.01 | -0.24*** | 0.28*** | 0.06 | 0 | 0.01 | 0.25*** | -0.13 | 0.15 | -0.15** | -0.29*** | 0.16* | 0.12** | 0.01 | -0.46*** | -0.1* | -0.19* | -0.05 | 0.02 | 0.27* |
|  | AHR | 0.14 | 0.16** | 0.23*** | 0.18** | 0.17 | 0.36*** | 0.47** | 0.29*** | -0.06 | 0.34*** | 0.31* | 0.43*** | 0.2** | 0.24*** | 0.29*** | -0.02 | 0 | 0.36** | 0.04 | 0.33*** | 0.3*** | 0.35*** | 0.45*** | -0.01 | 0.16** | 0.21*** | -0.24** | 0.17*** | 0.4*** | 0.27*** | -0.01 | 0.55*** |
| Bcell | CD19 | -0.01 | 0.13* | 0.03 | 0.08 | 0.15 | 0.05 | 0.26 | 0.1 | 0.05 | 0.36*** | -0.03 | 0.09* | 0.14* | 0.08 | 0.27*** | 0.06 | 0.1* | -0.04 | 0.19** | 0.19* | -0.09 | 0.04 | 0.09 | -0.08 | 0.19*** | 0.15** | -0.04 | 0.11* | 0.09 | -0.23*** | -0.09 | -0.13 |
|  | CD20 | -0.03 | -0.03 | 0.05 | 0.08 | -0.4* | -0.1* | 0.16 | -0.12 | 0.05 | 0.16*** | 0.17 | 0.06 | 0.28*** | 0.09 | 0.11 | -0.07 | 0.02 | -0.07 | -0.03 | 0.03 | 0.06 | 0.11* | 0.04 | 0.14* | -0.04 | -0.17** | -0.26** | 0.04 | 0.15 | 0.02 | 0.1 | 0.07 |
|  | CD38 | 0.35** | 0.26*** | 0.19*** | 0.1 | 0.03 | 0.16** | 0.23 | 0.18* | 0.38*** | 0.34*** | 0.41** | 0.43*** | 0.35*** | 0.4*** | 0.25*** | 0.15** | 0.13** | 0.07 | 0.12* | 0.36*** | 0.2** | -0.08 | 0.21* | 0.07 | 0.24*** | 0.29*** | 0.23** | 0.31*** | 0.17 | -0.02 | -0.04 | 0.5*** |
| CD8+ T Cell | CD8A | 0.06 | 0.2*** | 0.15*** | 0.09 | -0.08 | 0.21*** | 0.04 | 0.03 | -0.11 | 0.24*** | 0.15 | 0.22*** | 0.11 | 0 | 0.18** | 0.13** | 0.13** | 0.17 | 0.06 | 0.24** | 0.16* | 0.26*** | 0.16 | 0.02 | 0.14** | 0.14** | -0.07 | 0.19*** | -0.01 | -0.15* | 0.11 | 0.43*** |
|  | CD8B | -0.05 | 0.22*** | 0.1** | 0.16** | -0.08 | 0.1* | -0.21 | 0.03 | -0.26** | 0.21*** | -0.02 | 0.16** | 0.02 | 0.03 | 0.12* | 0.07 | 0.11* | 0.1 | 0.09 | 0.26** | 0.08 | 0.3*** | 0.17* | -0.04 | 0.12* | 0.16** | -0.23** | 0.1* | -0.16 | -0.27*** | -0.08 | 0.37** |
| Tfh | CXCR5 | 0.07 | 0.13* | 0.11** | 0.19** | -0.02 | 0.17** | 0.13 | 0.06 | 0.24** | 0.35*** | 0.01 | 0.2*** | 0.11 | -0.08 | 0.28*** | 0.11* | 0.2*** | 0.09 | 0.11 | 0.16* | -0.13 | 0.15** | 0.12 | -0.08 | 0.18*** | 0.1 | -0.08 | 0.15** | 0.21* | -0.21*** | -0.13 | 0.07 |
|  | ICOS | 0.2 | 0.18** | 0.22*** | 0.14* | -0.02 | 0.21*** | 0.08 | 0.16* | -0.11 | 0.27*** | 0.21 | 0.33*** | 0.21** | 0.09 | 0.3*** | 0.16*** | 0.11* | 0.11 | 0.08 | 0.29*** | 0.12 | 0.28*** | 0.31*** | 0.02 | 0.22*** | 0.32*** | 0.18* | 0.13** | 0.19* | -0.08 | -0.07 | 0.39*** |
|  | BCL-6 | 0.36** | 0.14** | 0.11** | 0.35*** | 0.17 | 0.35*** | 0.49** | 0.34*** | 0.34*** | 0.51*** | 0.22 | 0.25*** | 0.22*** | 0.02 | 0.32*** | 0.21*** | 0.16*** | 0.24* | 0.17** | 0.23** | 0.17* | 0.22*** | 0.32*** | 0 | 0.04 | 0.09 | -0.49*** | 0.21*** | 0.39*** | 0.13* | 0.12 | 0.67*** |
| TAM | HLA-G | 0.2 | 0.12* | 0.01 | 0.13* | -0.11 | -0.29*** | 0.08 | -0.2** | -0.06 | 0.1* | 0.2 | 0.08 | 0.01 | -0.02 | 0.19*** | 0.02 | -0.02 | -0.1 | 0 | 0.1 | 0.23** | 0.19*** | -0.34*** | -0.03 | 0.05 | 0.05 | 0.07 | -0.04 | 0.34*** | -0.1 | -0.23 | 0.47*** |
|  | CD80 | 0.31** | 0.25*** | 0.28*** | 0.12* | -0.07 | 0.21*** | 0.14 | 0.15* | 0 | 0.27*** | 0.13 | 0.44*** | 0.38*** | 0.08 | 0.41*** | 0.14** | 0.09* | 0.09 | 0.13* | 0.2** | 0.17* | 0.35*** | 0.19* | 0.12 | 0.24*** | 0.32*** | 0.19* | 0.21*** | 0.49*** | 0.12* | -0.11 | 0.48*** |
|  | CD86 | 0.12 | 0.26*** | 0.21*** | 0.1 | 0.07 | 0.26*** | 0.25 | 0.17* | -0.02 | 0.29*** | 0.23 | 0.42*** | 0.12 | 0.09 | 0.37*** | 0.14** | 0.05 | 0.09 | 0.05 | 0.28*** | 0.13 | 0.33*** | 0.26** | -0.1 | 0.2*** | 0.17** | -0.11 | 0.14** | 0.17 | -0.05 | -0.15 | 0.48*** |
| Monocyte | CD14 | 0.03 | 0.11* | -0.04 | -0.04 | -0.19 | 0.15** | -0.16 | 0.07 | -0.04 | 0.16** | 0.11 | 0.25*** | 0.09 | -0.01 | -0.29*** | 0.07 | 0.03 | -0.08 | -0.01 | 0.18* | 0.06 | 0.16** | -0.08 | -0.26*** | 0.06 | 0.11* | -0.36*** | 0.16** | -0.16 | -0.1 | -0.3* | 0.3** |
|  | CD16 | 0.23 | 0.24*** | 0.24*** | 0.07 | 0.06 | 0.26*** | -0.01 | 0.15* | 0.08 | 0.27*** | 0.38** | 0.46*** | 0.29*** | 0.11* | 0.27*** | 0.17*** | 0.07 | 0.18 | 0.07 | 0.22** | 0.17* | 0.39*** | 0.23** | 0.02 | 0.17*** | 0.2*** | 0.04 | 0.21*** | 0.3** | 0.16** | -0.2 | 0.61*** |
| NK | XCL1 | 0.05 | 0.17** | 0.12*** | 0.05 | -0.28 | 0.12* | -0.11 | 0.23** | -0.25** | 0.19*** | 0.09 | 0.04 | 0.04 | -0.05 | 0.19*** | 0.03 | 0.11* | 0.05 | 0.07 | 0.19* | 0.12 | 0.07 | 0.04 | -0.13* | 0.08 | 0.14** | -0.33*** | 0.03 | -0.11 | -0.27*** | -0.24 | 0.21 |
|  | KIR3DL1 | -0.07 | 0.05 | 0.12*** | 0.06 | -0.23 | 0.1* | -0.01 | -0.06 | 0.07 | 0.2*** | -0.12 | -0.01 | 0.04 | -0.01 | 0.05 | -0.01 | 0.12* | 0.03 | 0 | -0.01 | -0.02 | 0.14** | 0.08 | -0.03 | 0.05 | 0.13* | 0.01 | 0.14** | 0.04 | -0.16** | 0 | 0.21 |
|  | CD7 | 0.16 | 0.14** | 0.02 | -0.02 | -0.28 | 0.19*** | -0.32* | -0.01 | -0.11 | 0.23*** | -0.08 | -0.01 | -0.04 | -0.12* | 0.15** | 0.13** | 0.13** | 0.09 | -0.05 | 0.1 | -0.04 | 0.06 | -0.05 | -0.09 | 0.07 | 0.2*** | -0.15 | 0.01 | -0.39*** | -0.32*** | -0.46*** | 0.24* |
| Neutrophil | CD15 | 0.48*** | 0.32*** | 0.19*** | 0.13* | 0.29 | 0.26*** | 0.19 | -0.03 | 0.32*** | 0.49*** | 0.43*** | 0.6*** | 0.32*** | 0.22*** | 0.39*** | 0.2*** | 0.28*** | 0.4*** | 0.27*** | 0.25** | 0.56*** | 0.58*** | 0.36*** | 0.08 | 0.35*** | 0.34*** | 0.28** | 0.54*** | 0.33*** | 0.32*** | 0.21 | 0.58*** |
|  | MPO | 0.12 | 0.12* | 0.06* | 0.25*** | 0.14 | 0.1 | -0.19 | 0.02 | 0.09 | 0.27*** | 0.13 | 0.28*** | -0.02 | -0.01 | 0.1 | 0.13** | 0.09 | -0.02 | 0.28*** | 0.14 | 0.05 | 0.09 | -0.03 | 0 | 0.18*** | 0.17** | 0.12 | 0.16*** | -0.03 | -0.01 | 0.23 | 0.27* |
| DC | CD1C | 0.1 | 0.11* | 0.05 | 0.12 | 0.09 | 0.03 | 0.13 | 0.09 | -0.08 | 0.23*** | 0.09 | 0.18*** | 0.18** | 0.02 | 0.3*** | -0.13** | -0.08 | 0.13 | -0.03 | 0.2** | 0.21** | 0.29*** | -0.04 | -0.13* | 0.19*** | 0.03 | -0.41*** | 0.02 | -0.1 | -0.21*** | 0 | -0.05 |
|  | CD141 | 0.31** | -0.04 | -0.09** | -0.07 | 0.22 | 0.25*** | 0.25 | 0.14 | -0.03 | -0.07 | 0.11 | 0.26*** | 0.21** | -0.09 | 0.16** | -0.06 | -0.13** | 0.07 | 0.14* | 0.21** | 0.04 | 0.03 | 0.05 | -0.18** | 0.13** | 0.07 | -0.39*** | 0.31*** | 0.2* | -0.05 | -0.04 | 0.37** |
| Treg | FOXP3 | 0.1 | 0.3*** | 0.22*** | 0.28*** | 0.05 | 0.21*** | 0.34* | 0.21** | 0.31*** | 0.42*** | 0.16 | 0.18*** | 0.3*** | 0.24*** | 0.18** | 0.26*** | 0.25*** | 0.23* | 0.24*** | 0.29*** | 0.15 | 0.4*** | 0.14 | 0.2** | 0.13** | 0.33*** | 0.05 | 0.1* | 0.4*** | -0.05 | 0.16 | 0.39*** |
|  | CCR8 | 0.24* | 0.35*** | 0.31*** | 0.36*** | 0.02 | 0.32*** | 0.45** | 0.26*** | 0.02 | 0.44*** | 0.15 | 0.34*** | 0.34*** | 0.06 | 0.47*** | 0.32*** | 0.24*** | 0.41*** | 0.14* | 0.34*** | 0.19* | 0.47*** | 0.4*** | 0.1 | 0.21*** | 0.3*** | 0.5*** | 0.24*** | 0.62*** | 0.16** | 0.07 | 0.34** |
|  | CD25 | 0.35** | 0.02 | -0.07* | -0.18** | -0.3 | 0 | -0.32* | -0.27*** | -0.33*** | -0.06 | 0.12 | -0.01 | -0.05 | -0.11* | -0.03 | -0.04 | -0.06 | -0.18 | 0 | -0.05 | -0.06 | -0.13** | -0.15 | -0.04 | 0.11* | 0.04 | -0.13 | -0.05 | -0.13 | -0.26*** | -0.48*** | 0.44*** |
| T cell exhaustion | PD-1 | 0.08 | 0.17** | 0.09** | 0.06 | 0.31 | 0.2*** | -0.01 | 0.04 | 0.07 | 0.26*** | 0.05 | 0.17*** | 0.09 | -0.02 | 0.23*** | 0.17*** | 0.2*** | 0.16 | 0.08 | 0.17* | 0.01 | 0.12* | 0.11 | 0.08 | 0.12* | 0.33*** | -0.12 | 0.12** | -0.04 | -0.25*** | -0.13 | 0.39** |
|  | CTLA4 | 0.02 | 0.13* | 0.14*** | 0.03 | 0.1 | 0.29*** | -0.14 | 0.13 | 0.02 | 0.24*** | 0.23 | 0.19*** | 0.01 | -0.1* | 0.24*** | 0.19*** | 0.15** | 0.01 | 0.04 | 0.23** | -0.05 | 0.15** | 0.29*** | 0 | 0.16** | 0.32*** | -0.09 | 0.04 | 0.16 | -0.21*** | -0.09 | 0.32** |
| Macrophage | CD68 | 0.4*** | 0.14** | 0.2*** | 0.02 | -0.03 | 0.16** | 0.02 | -0.06 | 0.13 | 0.27*** | 0.25* | 0.35*** | 0.17** | 0.1* | 0.33*** | 0.07 | 0.02 | 0 | 0.14* | 0.28*** | 0.28*** | 0.3*** | -0.02 | -0.17** | 0.22*** | 0.18*** | -0.02 | 0.18*** | 0.3** | 0.07 | -0.16 | 0.32** |
|  | CD11b | 0.17 | 0.23*** | 0.31*** | 0.2** | 0.47** | 0.2*** | 0.4** | 0.15 | 0.21* | 0.4*** | 0.25* | 0.46*** | 0.22*** | 0.1* | 0.37*** | 0.14** | 0.23*** | 0.23* | 0.18** | 0.26** | 0.31*** | 0.33*** | 0.15 | -0.17** | 0.19*** | 0.24*** | 0.03 | 0.14** | 0.25** | -0.09 | -0.03 | 0.29** |
| M1 | NOS2 | 0.41*** | 0.22*** | 0.06 | 0.13* | 0.55** | 0.04 | -0.16 | 0 | 0.07 | 0.46*** | 0.07 | 0.19*** | 0.2** | 0.1* | 0.16** | 0.1* | 0.2*** | 0.1 | 0.3*** | 0.22** | 0.27*** | 0.23*** | 0.15 | -0.03 | 0.23*** | 0.11* | 0.06 | 0.24*** | 0.03 | 0.05 | 0.3* | 0.31** |
|  | ROS | 0.28* | 0.16** | 0.13*** | 0.09 | 0.12 | 0.09 | 0.2 | 0.13 | -0.01 | 0.11* | 0.33** | 0.04 | 0.28*** | 0.05 | 0.08 | 0.02 | -0.1* | 0.2 | -0.02 | 0.19* | 0.06 | 0.43*** | 0.05 | -0.17** | -0.11* | 0.07 | -0.3*** | 0.13** | 0.19* | 0.06 | -0.04 | 0.03 |
| M2 | ARG1 | 0.15 | 0.01 | 0.06 | 0.16** | 0.07 | -0.05 | 0.52** | -0.01 | -0.05 | -0.24*** | 0.05 | 0.06 | 0.08 | -0.1* | -0.21*** | 0.04 | -0.03 | -0.16 | 0.02 | 0.07 | -0.01 | 0.05 | 0.15 | 0.17* | -0.09 | 0.04 | -0.09 | 0.13** | 0.29** | 0.03 | -0.08 | -0.04 |
|  | MRC1 | 0.33** | 0.18** | 0.19*** | 0.1 | 0.05 | 0.13* | 0.15 | 0.12 | -0.04 | 0.23*** | 0.33** | 0.41*** | 0.36*** | -0.07 | -0.01 | 0.08 | 0.06 | 0.19 | 0.22*** | 0.25** | 0.35*** | 0.36*** | 0.1 | -0.22*** | 0.18*** | 0.23*** | -0.12 | 0.09 | 0.05 | 0.04 | -0.05 | 0.34** |
| *P < 0.05, **P < 0.01, ***P < 0.001. | | | | | | | | | | | | | | | | | | | | | | | | | | | | | | | | | |

| Table S17. The correlation between TP53 expression and immune cells related gene markers across 32 human tumors. (TIMER database). | | | | | | | | | | | | | | | | | | | | | | | | | | | | | | | | | |
| --- | --- | --- | --- | --- | --- | --- | --- | --- | --- | --- | --- | --- | --- | --- | --- | --- | --- | --- | --- | --- | --- | --- | --- | --- | --- | --- | --- | --- | --- | --- | --- | --- | --- |
| Cell Type | Gene Marker | ACC | BLCA | BRCA | CESC | CHOL | COAD | DLBC | ESCA | GBM | HNSC | KICH | KIRC | KIRP | LGG | LIHC | LUAD | LUSC | MESO | OV | PAAD | PCPG | PRAD | READ | SARC | SKCM | STAD | TGCT | THCA | THYM | UCEC | UCS | UVM |
| Th1 | IL12RB2 | 0.08 | -0.16** | 0 | 0 | -0.24 | 0 | 0.13 | 0.02 | 0.04 | 0.11* | 0.06 | 0.08 | 0.2** | -0.19*** | 0.01 | -0.06 | 0.11* | -0.21 | 0.07 | 0.05 | 0.07 | -0.03 | -0.02 | 0.03 | -0.06 | 0.13* | 0.15 | 0.16*** | -0.49*** | -0.01 | -0.01 | -0.4*** |
|  | WSX-1 | 0.19 | -0.04 | 0.13*** | 0.12* | 0.24 | 0.11* | -0.11 | 0.13 | 0.16 | 0.24*** | 0.35** | 0.21*** | 0.29*** | 0.19*** | 0.33*** | 0.02 | 0.08 | 0.06 | 0.03 | 0.31*** | 0.17* | 0.13** | 0.05 | 0.23*** | 0.19*** | 0.28*** | 0.22** | 0.35*** | 0.23* | 0.07 | 0.28* | 0.2 |
|  | T-BET | 0.18 | -0.15** | -0.01 | -0.02 | 0.04 | 0.09 | 0.24 | -0.01 | 0.03 | 0.36*** | 0.2 | 0.21*** | 0.05 | 0.37*** | 0.21*** | 0.01 | 0.16** | -0.12 | 0.03 | 0.16* | 0.06 | -0.02 | -0.1 | -0.02 | -0.06 | 0.22*** | -0.02 | 0.06 | -0.19* | -0.19** | -0.21 | 0.17 |
| Th2 | CCR3 | -0.22 | 0.07 | 0.07* | -0.03 | -0.04 | -0.15** | -0.05 | 0.06 | 0.05 | 0.08 | 0.08 | 0.07 | -0.05 | 0.03 | 0.24*** | -0.01 | 0.04 | 0.05 | 0.04 | 0.14 | 0.09 | -0.04 | 0 | -0.07 | -0.04 | -0.03 | 0.29*** | 0.26*** | -0.12 | -0.04 | 0.05 | 0.17 |
|  | STAT6 | 0.11 | 0.12* | 0.14*** | 0.13* | 0.3 | 0.04 | 0.55*** | -0.05 | 0.12 | 0.26*** | 0.1 | 0.18*** | 0.25*** | -0.06 | 0.23*** | 0.11* | 0.09* | -0.01 | 0.17** | 0.12 | 0.13 | 0.12* | 0 | 0.13* | 0.2*** | 0.11* | 0.41*** | 0.15** | -0.37*** | 0.1 | 0.12 | 0.41*** |
|  | GATA-3 | 0.14 | 0.07 | 0.08** | -0.02 | -0.12 | 0.04 | 0.09 | 0.12 | 0.15 | 0.2*** | 0.09 | 0.14** | -0.04 | 0.24*** | 0.3*** | 0.04 | 0.09 | 0.09 | -0.01 | 0.11 | 0.16* | 0.03 | -0.03 | 0.1 | 0.01 | 0.1 | 0.29*** | 0.23*** | 0.6*** | -0.11 | 0.03 | 0.08 |
| Th9 | TGFBR2 | 0.02 | 0.02 | 0.03 | 0.12 | -0.22 | -0.16** | 0.46** | 0.01 | 0.24** | 0.09* | 0.21 | 0.17*** | 0.22*** | 0.11* | 0.18** | 0.04 | 0.02 | -0.14 | 0.07 | 0.04 | 0.14 | 0.08 | -0.04 | 0 | 0.13** | -0.12* | 0.25** | 0.11* | -0.4*** | -0.09 | -0.17 | -0.19 |
|  | IRF4 | 0.12 | -0.04 | -0.01 | 0.01 | 0.09 | -0.04 | 0.2 | 0 | 0.06 | 0.31*** | 0.29* | 0.15** | -0.02 | 0.02 | 0.34*** | 0.06 | 0.13** | -0.18 | 0.01 | 0.17* | 0.01 | -0.03 | -0.12 | 0.19** | -0.08 | 0.15** | -0.08 | -0.05 | -0.14 | -0.24*** | -0.35* | -0.15 |
|  | PU.1 | 0.05 | -0.14** | -0.01 | 0.03 | -0.2 | 0.02 | 0.01 | 0.07 | 0.1 | 0.36*** | 0.24 | 0.23*** | -0.14* | 0.16** | 0.28*** | -0.07 | 0.1* | 0.04 | 0.02 | 0.23** | 0.24** | -0.1* | -0.17* | -0.13* | 0.03 | 0.22*** | 0.03 | 0.11* | -0.3** | -0.09 | 0.07 | 0.39*** |
| Th17 | IL-21 R | 0.23* | -0.11* | 0.04 | 0.04 | 0.12 | 0.07 | 0.24 | 0.1 | 0.16 | 0.41*** | 0.19 | 0.39*** | -0.05 | 0.2*** | 0.29*** | 0.05 | 0.16** | 0.11 | 0.06 | 0.24** | 0.14 | 0 | -0.11 | -0.11 | -0.04 | 0.26*** | 0.03 | 0.18*** | 0.38*** | -0.13* | -0.14 | 0.35** |
|  | IL-23R | 0.05 | 0 | 0.03 | 0.11 | -0.14 | -0.08 | -0.07 | -0.04 | -0.01 | 0.14** | 0.13 | 0.15** | 0.13* | 0.03 | 0.04 | 0.04 | 0.1* | -0.15 | 0.1 | 0.07 | 0.05 | 0.06 | 0.18* | -0.18** | -0.14** | 0 | -0.09 | 0.05 | -0.41*** | -0.04 | 0.2 | -0.09 |
|  | STAT3 | 0.14 | -0.05 | 0.09** | 0.04 | -0.1 | -0.05 | 0.4** | 0.07 | 0.35*** | 0.27*** | 0.32** | 0.34*** | 0.32*** | 0.3*** | 0.1 | 0.19*** | 0.06 | 0.08 | 0.17** | 0 | 0.04 | 0.14** | 0.03 | 0.04 | 0.1* | 0.08 | 0.26** | 0.18*** | -0.42*** | 0.12* | 0.06 | 0.16 |
| Th22 | CCR10 | 0.04 | 0.03 | -0.06 | 0.16** | 0.1 | -0.05 | 0.21 | 0.13 | 0.16 | 0.21*** | 0.06 | 0.21*** | 0.12 | 0.19*** | 0.09 | -0.06 | 0.03 | 0.17 | 0.04 | 0.07 | -0.03 | -0.21*** | -0.06 | -0.05 | 0.04 | 0.03 | 0.14 | 0.05 | -0.16 | -0.02 | 0.09 | 0.16 |
|  | AHR | 0.09 | 0.01 | 0.08* | 0.02 | -0.2 | -0.07 | 0.32* | 0.09 | -0.07 | 0.12** | 0.22 | 0.14** | 0.38*** | 0.16*** | 0.12* | -0.02 | -0.04 | -0.01 | -0.01 | 0.05 | 0.23** | 0.14** | 0 | -0.06 | 0.2*** | 0.04 | 0.25** | 0.28*** | -0.47*** | 0.04 | 0.01 | -0.2 |
| Bcell | CD19 | 0.11 | -0.05 | 0.02 | 0.1 | -0.04 | -0.03 | 0.09 | -0.08 | 0.1 | 0.28*** | 0.21 | 0.11* | -0.02 | 0.15** | 0.15** | 0.07 | 0.06 | -0.29** | 0.03 | 0.21** | 0.05 | -0.07 | -0.05 | 0 | -0.07 | 0.06 | -0.07 | 0.06 | -0.21* | -0.18** | 0.11 | 0.11 |
|  | CD20 | -0.23* | 0.02 | -0.05 | 0.04 | -0.42* | -0.16** | 0.11 | -0.03 | 0.19* | 0.09 | 0.23 | 0.02 | -0.05 | 0.09 | 0.03 | -0.02 | 0.02 | 0.03 | 0.04 | 0.07 | -0.02 | 0.15** | 0.1 | 0.14* | 0.04 | -0.06 | 0.31*** | -0.08 | -0.08 | 0.01 | 0.01 | 0.05 |
|  | CD38 | 0.19 | -0.17** | -0.01 | 0.01 | -0.09 | -0.07 | 0.12 | -0.04 | 0.19* | 0.19*** | 0.26* | 0.07 | -0.01 | 0 | 0.09 | 0.08 | 0.03 | -0.33** | 0 | 0.18* | -0.04 | 0.03 | 0.01 | -0.01 | -0.03 | 0.15** | -0.17* | 0.05 | 0.66*** | -0.15* | 0.11 | 0.06 |
| CD8+ T Cell | CD8A | 0.22 | -0.15** | 0.04 | 0.07 | -0.04 | 0.03 | 0.34* | -0.01 | -0.12 | 0.36*** | 0.38** | 0.11* | 0.04 | -0.02 | 0.27*** | -0.01 | 0.1* | 0.01 | 0.01 | 0.15 | 0.03 | 0.05 | -0.07 | 0.04 | -0.08 | 0.23*** | 0.08 | 0 | 0.7*** | -0.11 | -0.01 | 0.16 |
|  | CD8B | 0.11 | -0.06 | 0 | 0.12* | 0.1 | 0.07 | 0.06 | -0.07 | -0.21* | 0.36*** | 0.21 | 0.11* | -0.04 | 0.06 | 0.24*** | -0.03 | 0.09 | 0.06 | -0.08 | 0.11 | -0.03 | 0.1* | 0.13 | -0.03 | -0.08 | 0.13* | 0.21** | 0.12* | 0.67*** | -0.05 | -0.06 | 0.16 |
| Tfh | CXCR5 | -0.04 | -0.05 | 0.02 | 0.07 | 0.11 | 0.02 | 0.13 | 0.04 | 0.07 | 0.3*** | 0.08 | 0.21*** | 0 | 0.06 | 0.32*** | 0.1* | 0.13** | -0.27* | 0.05 | 0.16* | 0.08 | -0.05 | 0.06 | -0.04 | -0.07 | 0.1 | 0.05 | 0.11* | -0.1 | -0.19** | 0.06 | 0.12 |
|  | ICOS | 0.03 | -0.14** | 0.01 | 0.01 | 0.01 | -0.07 | -0.07 | 0.04 | -0.03 | 0.33*** | 0.24 | 0.1* | -0.03 | 0.23*** | 0.25*** | -0.04 | 0.1* | -0.09 | -0.04 | 0.15* | -0.1 | -0.03 | -0.12 | -0.1 | -0.11* | 0.19*** | 0.14 | 0.06 | 0.58*** | -0.15* | 0.03 | 0.11 |
|  | BCL-6 | 0.14 | 0.03 | 0.02 | 0.15* | -0.3 | -0.04 | 0.23 | 0.11 | 0.21* | 0.18*** | 0.29* | 0.15** | 0.33*** | -0.04 | 0.17** | 0.11* | -0.04 | -0.08 | 0.12 | 0 | -0.13 | -0.01 | -0.15 | -0.14* | -0.07 | -0.02 | 0.23** | 0.1* | -0.12 | -0.14* | -0.2 | -0.03 |
| TAM | HLA-G | 0.19 | -0.05 | 0.02 | 0 | -0.16 | -0.07 | 0.02 | -0.13 | 0.06 | 0.04 | -0.05 | 0.05 | 0.01 | 0.15** | 0.01 | -0.06 | 0.06 | -0.16 | 0.08 | 0.06 | 0.12 | -0.06 | 0.01 | -0.1 | -0.06 | -0.04 | 0.2* | 0.1* | -0.32*** | 0.08 | 0 | 0.11 |
|  | CD80 | -0.06 | -0.14** | 0.02 | 0.06 | -0.23 | -0.09 | 0.17 | 0.03 | 0.06 | 0.27*** | 0.36** | 0.08 | -0.11 | 0.21*** | 0.23*** | -0.07 | 0.09* | -0.11 | -0.03 | 0.12 | -0.03 | -0.06 | -0.12 | -0.15* | -0.07 | 0.2*** | 0.01 | 0.13** | -0.29** | -0.04 | -0.12 | 0.15 |
|  | CD86 | -0.01 | -0.17** | 0 | -0.01 | -0.16 | -0.06 | 0.11 | 0 | -0.04 | 0.28*** | 0.37** | 0.1* | -0.15* | 0.07 | 0.27*** | -0.09* | 0.09 | -0.06 | 0.01 | 0.11 | 0.02 | -0.06 | -0.15 | -0.15* | 0.01 | 0.17** | 0.06 | 0.06 | -0.44*** | -0.16** | 0.02 | 0.11 |
| Monocyte | CD14 | 0.11 | -0.18*** | -0.05 | -0.12* | -0.49** | -0.01 | -0.02 | -0.02 | 0.08 | 0.21*** | 0.31* | 0.17*** | -0.19** | 0.18*** | -0.21*** | -0.08 | 0.03 | -0.08 | -0.03 | 0.08 | 0.03 | -0.11* | -0.12 | -0.13* | 0.1* | 0.2*** | 0.07 | 0.06 | -0.34*** | -0.05 | 0.05 | 0.18 |
|  | CD16 | 0.11 | -0.2*** | 0 | -0.1 | -0.09 | -0.04 | 0.23 | 0.07 | 0.1 | 0.28*** | 0.4** | 0.17*** | -0.18** | 0.23*** | 0.14* | -0.09 | 0.07 | -0.06 | -0.01 | 0.06 | 0.16* | -0.04 | -0.13 | -0.21** | -0.03 | 0.22*** | 0.05 | 0.03 | -0.4*** | -0.11* | -0.01 | 0.14 |
| NK | XCL1 | -0.06 | 0.02 | 0.02 | -0.11 | -0.04 | 0.05 | 0.31* | 0.06 | -0.07 | 0.02 | 0.24 | 0.05 | -0.11 | 0.12** | 0.15** | -0.05 | 0.05 | -0.02 | 0.04 | 0.13 | -0.06 | -0.02 | 0 | -0.01 | 0 | 0 | 0.2* | -0.04 | -0.03 | -0.02 | -0.03 | 0.21 |
|  | KIR3DL1 | 0.08 | -0.05 | 0.02 | -0.08 | 0.23 | 0 | 0.08 | 0.08 | 0.06 | 0.3*** | -0.09 | 0.11* | -0.05 | 0.07 | 0.1 | -0.02 | 0.03 | -0.22* | 0.02 | 0.02 | 0.03 | 0.03 | -0.16 | 0.05 | -0.07 | 0.1 | 0.09 | 0.06 | -0.32** | -0.08 | -0.01 | 0.01 |
|  | CD7 | 0.16 | -0.12* | -0.03 | -0.05 | -0.06 | 0.08 | -0.05 | -0.01 | -0.03 | 0.36*** | 0.19 | 0.11* | 0.05 | 0.11* | 0.15** | -0.04 | 0.12** | -0.05 | -0.02 | 0.25** | 0.06 | -0.07 | -0.12 | 0.14* | -0.08 | 0.16** | 0.03 | 0.02 | 0.62*** | -0.14* | -0.13 | 0.32** |
| Neutrophil | CD15 | 0.23* | 0.02 | 0.09** | 0.1 | 0.23 | 0.01 | 0.22 | -0.03 | 0.28** | 0.29*** | 0.28* | 0.32*** | 0.22*** | 0.1* | 0.4*** | 0.02 | 0.12** | -0.06 | 0.09 | 0.21** | 0.24** | 0.22*** | 0.12 | 0.16* | 0.05 | 0.13* | -0.04 | 0.31*** | -0.03 | -0.01 | -0.26 | -0.24* |
|  | MPO | -0.1 | -0.04 | 0.06 | -0.05 | -0.17 | -0.05 | -0.01 | 0 | -0.05 | 0.11* | 0.16 | 0.12* | 0.01 | -0.07 | 0.05 | -0.06 | 0.08 | -0.05 | 0.12 | 0.19* | 0.1 | -0.11* | -0.01 | -0.06 | 0.08 | 0 | -0.15 | 0.01 | 0.18* | -0.07 | -0.09 | 0.33** |
| DC | CD1C | 0.02 | -0.01 | 0.09** | 0.25*** | 0 | -0.09 | 0.11 | 0.02 | 0.08 | 0.25*** | 0.17 | 0.13** | 0.04 | 0.13** | 0.24*** | 0.04 | 0 | -0.05 | 0.03 | 0.15 | 0.06 | 0.02 | -0.14 | 0.03 | 0.1* | -0.01 | 0.24** | 0.08 | 0.67*** | -0.07 | 0.1 | -0.02 |
|  | CD141 | -0.04 | -0.1 | 0.02 | -0.19** | -0.18 | -0.01 | 0.13 | 0 | 0.08 | -0.1* | 0.17 | 0.27*** | 0.28*** | 0.05 | 0.19** | 0.05 | -0.11* | -0.06 | 0.09 | 0.05 | 0.02 | -0.09 | -0.01 | 0.04 | 0.06 | -0.13* | 0.33*** | 0.12** | -0.52*** | -0.08 | -0.24 | 0.07 |
| Treg | FOXP3 | 0.08 | -0.09 | 0.07* | 0.22*** | -0.18 | 0.05 | -0.03 | 0.1 | 0.23** | 0.4*** | 0.24 | 0.16** | 0.18** | 0.18*** | -0.02 | 0.06 | 0.19*** | 0.06 | 0.08 | 0.19* | 0.04 | 0.09 | -0.06 | 0.08 | -0.05 | 0.28*** | 0.17* | 0.18*** | -0.32** | -0.16** | 0.03 | 0.32** |
|  | CCR8 | -0.03 | -0.08 | 0.06* | 0.13* | -0.16 | -0.01 | 0.01 | 0.07 | 0.06 | 0.32*** | -0.03 | 0.06 | -0.01 | 0.1* | 0.22*** | 0.03 | 0.14** | -0.02 | 0.01 | 0.07 | -0.08 | 0.11* | -0.05 | -0.14* | -0.07 | 0.2*** | 0.03 | 0.13** | 0.24* | -0.14* | 0.02 | 0.1 |
|  | CD25 | 0.19 | -0.11* | -0.04 | -0.05 | -0.1 | -0.03 | -0.2 | -0.11 | -0.11 | 0.18*** | 0.32** | 0.06 | 0.2** | 0.11* | 0.08 | -0.03 | 0.06 | -0.21 | -0.06 | 0.25** | 0.06 | 0 | -0.11 | -0.1 | -0.24*** | -0.04 | 0.13 | 0.19*** | 0.31** | -0.14* | -0.01 | 0.43*** |
| T cell exhaustion | PD-1 | 0 | -0.15** | -0.04 | 0 | -0.04 | 0.1* | 0.1 | 0.02 | 0.01 | 0.38*** | 0.27* | 0.1* | 0.09 | 0.17*** | 0.3*** | 0.01 | 0.12** | 0.11 | -0.04 | 0.23** | 0 | -0.04 | -0.05 | 0.05 | -0.1* | 0.26*** | -0.03 | 0.1* | 0.67*** | -0.15* | -0.1 | 0.27* |
|  | CTLA4 | 0.03 | -0.17** | -0.02 | 0.01 | 0.09 | 0.04 | -0.24 | 0.02 | 0.06 | 0.33*** | 0.25* | 0.01 | -0.06 | 0.08 | 0.28*** | -0.06 | 0.1* | 0 | -0.03 | 0.21** | -0.05 | -0.11* | -0.16 | -0.04 | -0.21*** | 0.24*** | 0.02 | 0.05 | -0.32** | -0.14* | 0.01 | 0.08 |
| Macrophage | CD68 | -0.11 | -0.08 | -0.01 | -0.17** | -0.39* | 0.02 | 0.09 | -0.07 | 0.09 | 0.19*** | 0.35** | 0.1* | 0.08 | 0.21*** | 0.25*** | -0.11* | 0.08 | -0.12 | 0.08 | 0.13 | 0.06 | -0.07 | 0.09 | -0.18** | -0.06 | 0.11* | 0.01 | 0.09 | -0.29** | -0.13* | 0.04 | 0.44*** |
|  | CD11b | 0.01 | -0.11* | 0.12*** | 0.04 | 0.26 | -0.01 | -0.03 | 0.03 | 0.18* | 0.27*** | 0.4** | 0.2*** | -0.06 | 0.03 | 0.17** | -0.03 | 0.11* | 0.1 | 0.15* | 0.11 | 0.11 | -0.06 | -0.12 | -0.13* | 0.05 | 0.15** | -0.04 | 0.04 | -0.19* | -0.09 | 0.06 | 0.09 |
| M1 | NOS2 | 0.12 | 0.06 | 0.06 | 0.3*** | 0.24 | 0.12* | 0.05 | -0.1 | 0.09 | 0.34*** | 0.25* | 0.27*** | 0.03 | -0.07 | 0.04 | 0.03 | 0.11* | 0.06 | 0.04 | 0.18* | 0.06 | 0 | 0.05 | 0.2** | 0.13** | 0.16** | 0.19* | 0.14** | -0.16 | -0.01 | -0.22 | 0.14 |
|  | ROS | 0.13 | -0.09 | 0.02 | -0.05 | -0.03 | -0.08 | 0.09 | 0.03 | -0.19* | 0.04 | 0 | 0.12* | -0.02 | -0.22*** | -0.15** | 0.04 | 0 | 0.01 | 0.07 | 0.08 | -0.18* | 0.07 | 0.11 | -0.16* | 0.11* | -0.09 | 0.27** | 0.09 | -0.11 | 0.01 | -0.4** | 0.1 |
| M2 | ARG1 | 0.06 | 0.05 | 0.01 | 0.07 | -0.22 | -0.02 | -0.06 | -0.07 | 0.02 | -0.25*** | 0.13 | -0.02 | 0.09 | -0.2*** | -0.32*** | -0.02 | -0.02 | -0.04 | 0.1 | 0.05 | -0.17* | 0.02 | -0.15 | 0.07 | 0.04 | -0.07 | 0.18* | -0.06 | -0.15 | -0.09 | -0.09 | -0.2 |
|  | MRC1 | 0.01 | -0.18*** | -0.03 | -0.06 | -0.49** | -0.09 | 0.26 | 0.02 | 0 | 0.1* | 0.23 | 0.17*** | -0.2** | -0.31*** | -0.07 | -0.05 | -0.03 | -0.1 | 0.18** | 0.03 | 0.06 | -0.02 | -0.1 | -0.13* | 0.06 | 0.09 | 0.03 | 0.08 | -0.36*** | -0.08 | 0.05 | -0.22 |
| *P < 0.05, **P < 0.01, ***P < 0.001. | | | | | | | | | | | | | | | | | | | | | | | | | | | | | | | | | |

| Table S18. Correlations between three kinds of immunomodulators and expression of five hub genes in ACC and LGG (TISIDB database) | | | | | | | | | | | | | | | | | | | | | |
| --- | --- | --- | --- | --- | --- | --- | --- | --- | --- | --- | --- | --- | --- | --- | --- | --- | --- | --- | --- | --- | --- |
| Immunomodulators  Types | | JUN-ACC | | JUN-LGG | | NFKB1-ACC | | NFKB1-LGG | | CASP3-ACC | | CASP3-LGG | | PARP1-ACC | | PARP1-LGG | | TP53-ACC | | TP53-LGG | |
| Cor | P-value | Cor | p-value | Cor | p-value | Cor | p-value | Cor | p-value | Cor | p-value | Cor | p-value | Cor | p-value | Cor | p-value | Cor | p-value |
| Immuno-  inhibitor | ADORA2A | 0.113 | 0.320 | **-0.096** | **0.027** | -0.051 | 0.654 | **-0.163** | **<0.001** | -0.046 | 0.684 | **-0.124** | **0.004** | -0.038 | 0.741 | -0.081 | 0.063 | -0.042 | 0.715 | **0.184** | **<0.001** |
| CD160 | 0.113 | 0.322 | 0.013 | 0.764 | 0.136 | 0.231 | **-0.277** | **<0.001** | 0.026 | 0.821 | **-0.311** | **<0.001** | -0.154 | 0.174 | **-0.372** | **<0.001** | 0.012 | 0.919 | **-0.267** | **<0.001** |
| CD244 | **0.246** | **0.029** | **0.101** | **0.020** | **0.334** | **0.003** | 0.013 | 0.770 | **-0.261** | **0.021** | 0.025 | 0.563 | -0.130 | 0.253 | **-0.192** | **<0.001** | -0.126 | 0.269 | **-0.178** | **<0.001** |
| CD274 | 0.208 | 0.066 | **0.345** | **<0.001** | **0.384** | **0.001** | **0.415** | **<0.001** | **-0.294** | **0.009** | **0.107** | **0.014** | 0.091 | 0.422 | -0.081 | 0.061 | -0.202 | 0.074 | **-0.242** | **<0.001** |
| CD96 | 0.207 | 0.068 | **0.355** | **<0.001** | **0.330** | **0.003** | **0.360** | **<0.001** | **-0.252** | **0.026** | **0.274** | **<0.001** | -0.186 | 0.101 | -0.071 | 0.101 | -0.024 | 0.832 | -0.004 | 0.924 |
| CSF1R | **0.247** | **0.028** | **0.371** | **<0.001** | **0.229** | **0.043** | **0.526** | **<0.001** | -0.217 | 0.055 | 0.006 | 0.888 | -0.082 | 0.471 | -0.049 | 0.256 | -0.104 | 0.363 | **-0.237** | **<0.001** |
| CTLA4 | 0.211 | 0.063 | NA | NA | 0.095 | 0.404 | NA | NA | **-0.254** | **0.024** | NA | NA | -0.059 | 0.603 | NA | NA | -0.097 | 0.394 | 0.000 | NA |
| HAVCR2 | **0.373** | **<0.001** | **0.442** | **<0.001** | **0.246** | **0.029** | **0.561** | **<0.001** | -0.184 | 0.104 | **0.189** | **<0.001** | 0.047 | 0.677 | -0.020 | 0.653 | -0.214 | 0.059 | **-0.089** | **0.041** |
| IDO1 | 0.172 | 0.131 | **0.389** | **<0.001** | -0.035 | 0.757 | **0.344** | **<0.001** | -0.029 | 0.801 | **0.291** | **<0.001** | -0.011 | 0.924 | **-0.128** | **0.003** | -0.077 | 0.501 | 0.075 | 0.086 |
| IL10 | **0.335** | **0.003** | **0.382** | **<0.001** | 0.203 | 0.073 | **0.464** | **<0.001** | -0.188 | 0.096 | **0.179** | **<0.001** | 0.190 | 0.094 | -0.058 | 0.183 | -0.110 | 0.335 | -0.015 | 0.734 |
| IL10RB | 0.160 | 0.159 | **0.288** | **<0.001** | -0.048 | 0.675 | **0.470** | **<0.001** | **0.421** | **<0.001** | **0.317** | **<0.001** | **0.470** | **<0.001** | -0.013 | 0.765 | 0.015 | 0.896 | **0.309** | **<0.001** |
| KDR | 0.171 | 0.131 | 0.023 | 0.605 | **0.249** | **0.027** | **0.087** | **0.046** | **-0.262** | **0.020** | **0.242** | **<0.001** | 0.035 | 0.760 | **0.169** | **<0.001** | **-0.239** | **0.035** | **0.162** | **<0.001** |
| LAG3 | **0.274** | **0.015** | **0.212** | **<0.001** | -0.125 | 0.272 | **0.180** | **<0.001** | -0.147 | 0.195 | 0.029 | 0.507 | -0.195 | 0.085 | **-0.144** | **0.001** | 0.157 | 0.166 | **0.218** | **<0.001** |
| LGALS9 | **0.243** | **0.031** | **0.394** | **<0.001** | 0.157 | 0.167 | **0.485** | **<0.001** | -0.079 | 0.485 | **0.166** | **<0.001** | -0.026 | 0.822 | -0.028 | 0.521 | -0.053 | 0.640 | -0.011 | 0.794 |
| PDCD1 | **0.321** | **0.004** | **0.479** | **<0.001** | 0.007 | 0.954 | **0.427** | **<0.001** | -0.169 | 0.136 | **0.250** | **<0.001** | -0.037 | 0.743 | **-0.118** | **0.007** | -0.062 | 0.585 | 0.049 | 0.258 |
| PDCD1LG2 | **0.270** | **0.016** | **0.444** | **<0.001** | **0.302** | **0.007** | **0.553** | **<0.001** | **-0.304** | **0.007** | **0.297** | **<0.001** | 0.020 | 0.864 | -0.012 | 0.782 | -0.168 | 0.140 | **-0.111** | **0.011** |
| PVRL2 | -0.052 | 0.650 | **0.340** | **<0.001** | **-0.305** | **0.006** | **0.300** | **<0.001** | 0.190 | 0.093 | **0.355** | **<0.001** | -0.062 | 0.589 | -0.051 | 0.236 | **0.319** | **0.004** | **0.149** | **<0.001** |
| TGFB1 | **0.344** | **0.002** | **0.503** | **<0.001** | 0.133 | 0.242 | **0.562** | **<0.001** | 0.121 | 0.286 | **0.160** | **<0.001** | 0.092 | 0.420 | -0.072 | 0.096 | -0.001 | 0.992 | -0.039 | 0.367 |
| TGFBR1 | **0.413** | **<0.001** | **0.192** | **<0.001** | -0.096 | 0.399 | **0.445** | **<0.001** | 0.196 | 0.084 | **0.342** | **<0.001** | 0.189 | 0.095 | **0.167** | **<0.001** | -0.073 | 0.522 | **0.295** | **<0.001** |
| T1GIT | **0.263** | **0.020** | 0.022 | 0.610 | **0.258** | **0.022** | **0.158** | **<0.001** | **-0.284** | **0.011** | **0.164** | **<0.001** | 0.062 | 0.587 | 0.042 | 0.338 | -0.101 | 0.377 | -0.082 | 0.061 |
| VTCN1 | NA | NA | -0.060 | NA | NA | NA | -0.005 | 0.914 | NA | NA | **-0.142** | **0.001** | NA | NA | 0.050 | 0.251 | 0.000 | NA | 0.206 | <0.001 |
| Immuno-  stimulator | C10orf54 | 0.219 | 0.053 | **0.262** | **<0.001** | **0.433** | **<0.001** | **0.303** | **<0.001** | -0.119 | 0.296 | **-0.124** | **0.004** | -0.033 | 0.775 | -0.180 | <0.001 | -0.096 | 0.398 | -0.355 | <0.001 |
| CD27 | 0.117 | 0.302 | 0.073 | 0.094 | 0.197 | 0.082 | 0.084 | 0.054 | -0.247 | 0.029 | **0.129** | **0.003** | -0.081 | 0.476 | -0.135 | 0.002 | -0.033 | 0.775 | 0.176 | <0.001 |
| CD276 | 0.212 | 0.061 | **0.385** | **<0.001** | 0.094 | 0.411 | **0.472** | **<0.001** | 0.181 | 0.111 | **0.448** | **<0.001** | **0.287** | **0.011** | **0.173** | **<0.001** | -0.080 | 0.481 | **0.416** | **<0.001** |
| CD28 | **0.309** | **0.006** | **0.201** | **<0.001** | **0.238** | **0.035** | **0.270** | **<0.001** | -0.174 | 0.124 | **0.187** | **<0.001** | 0.141 | 0.214 | 0.037 | 0.394 | -0.136 | 0.232 | **0.137** | **0.002** |
| CD40 | 0.050 | 0.660 | **0.300** | **<0.001** | 0.156 | 0.171 | **0.368** | **<0.001** | **-0.344** | **0.002** | **0.162** | **<0.001** | **-0.232** | **0.040** | **-0.088** | **0.042** | 0.097 | 0.396 | -0.060 | 0.171 |
| CD48 | **0.317** | **0.005** | **0.275** | **<0.001** | 0.176 | 0.121 | **0.375** | **<0.001** | -0.170 | 0.133 | **0.270** | **<0.001** | -0.042 | 0.714 | 0.028 | 0.517 | -0.091 | 0.423 | **0.125** | **0.004** |
| CD70 | 0.172 | 0.129 | NA | NA | -0.097 | 0.393 | NA | NA | 0.029 | 0.799 | NA | NA | -0.082 | 0.469 | NA | NA | 0.055 | 0.628 | NA | NA |
| CD80 | **0.342** | **0.002** | NA | NA | 0.088 | 0.440 | NA | NA | -0.122 | 0.283 | NA | NA | 0.156 | 0.169 | NA | NA | -0.167 | 0.140 | NA | NA |
| CD86 | **0.308** | **0.006** | **0.458** | **<0.001** | 0.042 | 0.714 | **0.580** | **<0.001** | -0.175 | 0.123 | **0.152** | **<0.001** | -0.041 | 0.718 | -0.064 | 0.141 | -0.168 | 0.138 | **-0.167** | **<0.001** |
| CXCL12 | 0.070 | 0.539 | 0.071 | 0.102 | **0.269** | **0.017** | **0.199** | **<0.001** | **-0.295** | **0.008** | -0.009 | 0.836 | -0.020 | 0.859 | 0.010 | 0.826 | 0.083 | 0.465 | 0.009 | 0.831 |
| CXCR4 | -0.095 | 0.406 | **0.464** | **<0.001** | -0.081 | 0.478 | **0.459** | **<0.001** | 0.026 | 0.818 | **0.302** | **<0.001** | **-0.302** | **0.007** | -0.007 | 0.873 | -0.033 | 0.774 | **-0.101** | **0.020** |
| ENTPD1 | -0.036 | 0.755 | 0.033 | 0.451 | 0.199 | 0.079 | **0.353** | **<0.001** | 0.086 | 0.451 | 0.057 | 0.193 | -0.111 | 0.331 | **0.164** | **<0.001** | 0.108 | 0.344 | 0.060 | 0.170 |
| HHLA2 | 0.150 | 0.186 | NA | NA | 0.050 | 0.660 | NA | NA | -0.018 | 0.878 | NA | NA | 0.041 | 0.719 | NA | NA | -0.197 | 0.081 | NA | NA |
| ICOS | **0.286** | **0.011** | NA | NA | 0.043 | 0.709 | NA | NA | **-0.288** | **0.010** | NA | NA | 0.020 | 0.859 | NA | NA | -0.070 | 0.541 | NA | NA |
| ICOSLG | **0.474** | **<0.001** | **0.298** | **<0.001** | **0.272** | **0.016** | **0.268** | **<0.001** | -0.083 | 0.467 | **0.117** | **0.007** | 0.046 | 0.690 | 0.040 | 0.363 | -0.115 | 0.313 | **-0.120** | **0.006** |
| IL2RA | 0.220 | 0.051 | **0.282** | **<0.001** | **0.333** | **0.003** | **0.359** | **<0.001** | **-0.247** | **0.029** | **0.169** | **<0.001** | 0.066 | 0.561 | **-0.092** | **0.034** | -0.137 | 0.228 | **0.095** | **0.029** |
| IL6 | **0.319** | **0.004** | **0.554** | **<0.001** | 0.143 | 0.210 | **0.319** | **<0.001** | -0.145 | 0.203 | **0.195** | **<0.001** | **0.283** | **0.012** | **-0.124** | **0.004** | -0.096 | 0.399 | -0.015 | 0.738 |
| IL6R | 0.064 | 0.575 | **0.256** | **<0.001** | **0.461** | **<0.001** | **0.568** | **<0.001** | **-0.276** | **0.014** | **0.114** | **0.008** | 0.115 | 0.313 | 0.012 | 0.780 | **-0.331** | **0.003** | **-0.135** | **0.002** |
| KLRK1 | **0.351** | **0.002** | **-0.110** | **0.012** | 0.203 | 0.072 | -0.026 | 0.557 | -0.103 | 0.367 | **-0.152** | **<0.001** | 0.024 | 0.830 | **-0.092** | **0.034** | -0.096 | 0.400 | **0.190** | **<0.001** |
| MICB | -0.045 | 0.693 | **0.449** | **<0.001** | 0.086 | 0.453 | **0.498** | **<0.001** | -0.015 | 0.895 | **0.251** | **<0.001** | 0.155 | 0.171 | -0.010 | 0.822 | -0.118 | 0.298 | 0.011 | 0.801 |
| NT5E | **0.353** | **0.002** | **-0.141** | **0.001** | **0.254** | **0.024** | **-0.086** | **0.048** | 0.046 | 0.684 | **0.137** | **0.002** | 0.080 | 0.484 | **0.176** | **<0.001** | -0.020 | 0.858 | 0.043 | 0.326 |
| PVR | -0.048 | 0.672 | **0.249** | **<0.001** | -0.187 | 0.099 | -0.036 | 0.407 | -0.095 | 0.406 | -0.028 | 0.527 | **-0.256** | **0.023** | **-0.119** | **0.006** | 0.046 | 0.685 | 0.016 | 0.720 |
| RAET1E | -0.151 | 0.185 | NA | NA | -0.092 | 0.419 | NA | NA | 0.098 | 0.389 | NA | NA | 0.032 | 0.778 | NA | NA | -0.108 | 0.345 | NA | NA |
| TMEM173 | **0.282** | **0.012** | **0.337** | **<0.001** | **0.443** | **<0.001** | **0.470** | **<0.001** | -0.126 | 0.266 | **0.149** | **0.001** | 0.220 | 0.052 | 0.016 | 0.708 | -0.105 | 0.356 | 0.073 | 0.095 |
| TMIGD2 | NA | NA | **0.117** | **0.007** | NA | NA | 0.069 | 0.110 | NA | NA | **-0.102** | **0.019** | NA | NA | -0.021 | 0.628 | NA | NA | **-0.088** | **0.043** |
| TNFRSF13C | NA | NA | 0.016 | 0.713 | NA | NA | 0.019 | 0.667 | NA | NA | **-0.169** | **<0.001** | NA | NA | 0.038 | 0.383 | NA | NA | -0.021 | 0.625 |
| TNFRSF14 | 0.010 | 0.928 | **0.318** | **<0.001** | -0.138 | 0.225 | **0.168** | **<0.001** | -0.019 | 0.865 | **0.137** | **0.002** | -0.112 | 0.323 | **-0.261** | **<0.001** | -0.011 | 0.927 | **-0.149** | **<0.001** |
| TNFRSF18 | **0.265** | **0.018** | NA | NA | 0.119 | 0.297 | NA | NA | **-0.261** | **0.020** | NA | NA | -0.182 | 0.108 | NA | NA | -0.003 | 0.977 | NA | NA |
| TNFRSF25 | 0.095 | 0.402 | **0.235** | **<0.001** | -0.133 | 0.243 | -0.005 | 0.911 | 0.110 | 0.334 | **-0.087** | **0.045** | -0.169 | 0.137 | **-0.366** | **<0.001** | **0.280** | **0.013** | **-0.230** | **<0.001** |
| TNFRSF4 | 0.133 | 0.242 | **0.272** | **<0.001** | -0.159 | 0.162 | **0.126** | **0.004** | 0.022 | 0.846 | 0.083 | 0.056 | -0.087 | 0.446 | **-0.237** | **<0.001** | 0.045 | 0.695 | **0.135** | **0.002** |
| TNFRSF8 | 0.025 | 0.824 | **0.293** | **<0.001** | 0.173 | 0.128 | **0.339** | **<0.001** | -0.049 | 0.666 | -0.015 | 0.732 | 0.174 | 0.124 | -0.064 | 0.138 | -0.174 | 0.125 | -0.072 | 0.097 |
| TNFRSF9 | **0.267** | **0.018** | NA | NA | 0.204 | 0.071 | NA | NA | -0.164 | 0.149 | NA | NA | **0.433** | **<0.001** | NA | NA | **-0.307** | **0.006** | NA | NA |
| TNFSF13 | 0.013 | 0.906 | **0.317** | **<0.001** | **0.255** | **0.024** | **0.289** | **<0.001** | **-0.324** | **0.004** | -0.023 | 0.601 | 0.076 | 0.506 | **-0.273** | **<0.001** | -0.028 | 0.806 | **-0.367** | **<0.001** |
| TNFSF13B | 0.019 | 0.867 | **0.205** | **<0.001** | 0.095 | 0.402 | **0.393** | **<0.001** | **0.375** | **0.001** | **0.213** | **<0.001** | **0.272** | **0.016** | 0.016 | 0.714 | -0.048 | 0.674 | 0.061 | 0.158 |
| TNFSF14 | 0.211 | 0.062 | NA | NA | 0.157 | 0.167 | NA | NA | **-0.381** | **0.001** | NA | NA | -0.191 | 0.092 | NA | NA | -0.004 | 0.975 | NA | NA |
| TNFSF18 | NA | NA | **0.297** | **<0.001** | NA | NA | **0.165** | **<0.001** | NA | NA | -0.082 | 0.060 | NA | NA | -0.019 | 0.666 | NA | NA | **-0.154** | **<0.001** |
| TNFSF4 | -0.185 | 0.103 | **0.210** | **<0.001** | -0.047 | 0.681 | **0.209** | **<0.001** | -0.060 | 0.598 | -0.007 | 0.879 | 0.005 | 0.967 | **-0.139** | **0.001** | 0.062 | 0.589 | **-0.171** | **<0.001** |
| TNFSF9 | 0.003 | 0.977 | 0.028 | 0.523 | -0.101 | 0.374 | **-0.285** | **<0.001** | -0.064 | 0.575 | **-0.175** | **<0.001** | -0.181 | 0.109 | **-0.231** | **<0.001** | 0.144 | 0.203 | **-0.275** | **<0.001** |
| ULBP1 | -0.003 | 0.981 | **0.230** | **<0.001** | -0.122 | 0.284 | **0.095** | **0.029** | 0.067 | 0.558 | **0.202** | **<0.001** | 0.052 | 0.649 | **-0.088** | **0.042** | **-0.275** | **0.014** | -0.060 | 0.171 |
| MHC  molecule | B2M | 0.207 | 0.068 | **0.358** | **<0.001** | **0.381** | **0.001** | **0.486** | **<0.001** | **-0.258** | **0.022** | **0.288** | **<0.001** | 0.172 | 0.128 | 0.018 | 0.685 | -0.183 | 0.107 | **0.092** | **0.033** |
| HLA-A | 0.091 | 0.424 | **0.336** | **<0.001** | 0.139 | 0.222 | **0.396** | **<0.001** | -0.154 | 0.174 | **0.253** | **<0.001** | -0.159 | 0.160 | -0.039 | 0.373 | -0.069 | 0.543 | **0.164** | **<0.001** |
| HLA-B | 0.168 | 0.139 | **0.353** | **<0.001** | **0.299** | **0.008** | **0.439** | **<0.001** | -0.143 | 0.209 | **0.302** | **<0.001** | 0.057 | 0.616 | -0.027 | 0.531 | -0.152 | 0.181 | **0.093** | **0.032** |
| HLA-C | 0.147 | 0.194 | **0.358** | **<0.001** | **0.233** | **0.039** | **0.426** | **<0.001** | -0.128 | 0.260 | **0.259** | **<0.001** | 0.154 | 0.175 | -0.068 | 0.121 | -0.150 | 0.187 | 0.083 | 0.056 |
| HLA-DMA | **0.264** | **0.019** | **0.469** | **<0.001** | 0.135 | 0.236 | **0.525** | **<0.001** | -0.176 | 0.121 | **0.222** | **<0.001** | -0.025 | 0.830 | -0.060 | 0.169 | -0.185 | 0.102 | -0.021 | 0.628 |
| HLA-DMB | **0.274** | **0.015** | **0.433** | **<0.001** | **0.247** | **0.028** | **0.569** | **<0.001** | 0.108 | 0.341 | **0.232** | **<0.001** | **0.246** | **0.029** | -0.016 | 0.707 | **-0.343** | **0.002** | -0.044 | 0.315 |
| HLA-DOA | **0.294** | **0.008** | **0.449** | **<0.001** | **0.324** | **0.004** | **0.526** | **<0.001** | -0.206 | 0.069 | **0.234** | **<0.001** | 0.017 | 0.883 | -0.028 | 0.522 | -0.185 | 0.103 | -0.056 | 0.196 |
| HLA-DOB | **0.295** | **0.009** | **0.278** | **<0.001** | 0.043 | 0.704 | **0.352** | **<0.001** | -0.220 | 0.051 | **0.124** | **0.004** | 0.025 | 0.827 | **-0.133** | **0.002** | -0.061 | 0.590 | 0.003 | 0.942 |
| HLA-DPA1 | 0.214 | 0.060 | **0.442** | **<0.001** | 0.182 | 0.107 | **0.486** | **<0.001** | **-0.259** | **0.021** | **0.241** | **<0.001** | -0.046 | 0.686 | -0.031 | 0.480 | -0.142 | 0.213 | 0.007 | 0.881 |
| HLA-DPB1 | **0.240** | **0.034** | **0.441** | **<0.001** | **0.258** | **0.022** | **0.467** | **<0.001** | -0.175 | 0.124 | **0.246** | **<0.001** | -0.020 | 0.859 | -0.043 | 0.319 | -0.151 | 0.184 | 0.006 | 0.898 |
| HLA-DQA1 | **0.283** | **0.012** | **0.390** | **<0.001** | 0.217 | 0.055 | **0.435** | **<0.001** | -0.206 | 0.069 | **0.241** | **<0.001** | 0.004 | 0.973 | 0.007 | 0.876 | -0.164 | 0.149 | 0.060 | 0.171 |
| HLA-DQA2 | **0.252** | **0.025** | **0.356** | **<0.001** | **0.281** | **0.012** | **0.397** | **<0.001** | -0.187 | 0.099 | **0.225** | **<0.001** | -0.075 | 0.513 | -0.050 | 0.252 | -0.097 | 0.393 | 0.043 | 0.327 |
| HLA-DQB1 | 0.191 | 0.092 | **0.364** | **<0.001** | 0.186 | 0.101 | **0.373** | **<0.001** | -0.167 | 0.140 | **0.193** | **<0.001** | -0.028 | 0.803 | -0.028 | 0.517 | -0.125 | 0.273 | 0.020 | 0.638 |
| HLA-DRA | **0.231** | **0.041** | **0.467** | **<0.001** | **0.246** | **0.029** | **0.516** | **<0.001** | -0.191 | 0.091 | **0.259** | **<0.001** | -0.018 | 0.874 | -0.039 | 0.371 | -0.183 | 0.106 | -0.024 | 0.574 |
| HLA-DRB1 | 0.193 | 0.088 | **0.440** | **<0.001** | 0.221 | 0.050 | **0.463** | **<0.001** | -0.203 | 0.072 | **0.231** | **<0.001** | 0.000 | 0.998 | -0.022 | 0.618 | -0.221 | 0.050 | -0.001 | 0.981 |
| HLA-E | **0.252** | **0.025** | **0.376** | **<0.001** | **0.377** | **0.001** | **0.545** | **<0.001** | **-0.234** | **0.038** | **0.196** | **<0.001** | 0.040 | 0.726 | 0.014 | 0.745 | -0.203 | 0.073 | -0.050 | 0.247 |
| HLA-F | 0.141 | 0.216 | **0.314** | **<0.001** | **0.260** | **0.021** | **0.338** | **<0.001** | -0.161 | 0.157 | **0.193** | **<0.001** | -0.074 | 0.516 | **-0.127** | **0.003** | -0.114 | 0.317 | 0.045 | 0.305 |
| HLA-G | 0.050 | 0.658 | **0.264** | **<0.001** | 0.068 | 0.553 | **0.358** | **<0.001** | -0.049 | 0.669 | **0.154** | **<0.001** | 0.013 | 0.909 | **-0.092** | **0.035** | -0.072 | 0.527 | 0.083 | 0.056 |
| TAP1 | **0.252** | **0.025** | **0.250** | **<0.001** | **0.246** | **0.029** | **0.390** | **<0.001** | 0.013 | 0.908 | **0.344** | **<0.001** | **0.335** | **0.003** | 0.009 | 0.834 | -0.204 | 0.071 | **0.254** | **<0.001** |
| TAP2 | 0.146 | 0.198 | **0.217** | **<0.001** | **0.305** | **0.006** | **0.374** | **<0.001** | 0.019 | 0.865 | **0.274** | **<0.001** | **0.340** | **0.002** | 0.065 | 0.137 | -0.146 | 0.200 | **0.170** | **<0.001** |
| TAPBP | 0.148 | 0.194 | **0.332** | **<0.001** | -0.005 | 0.964 | **0.210** | **<0.001** | -0.104 | 0.360 | **0.158** | **<0.001** | 0.003 | 0.980 | **-0.197** | **<0.001** | -0.122 | 0.285 | **0.106** | **0.014** |
| Parameters with P-value<0.05 were highlighted in bold. | | | | | | | | | | | | | | | | | | | | | |
