# Supplementary material
Source: publisher figshare collection journal article supplement (https://tandf.figshare.com/articles/dataset/_/20332150)

**a**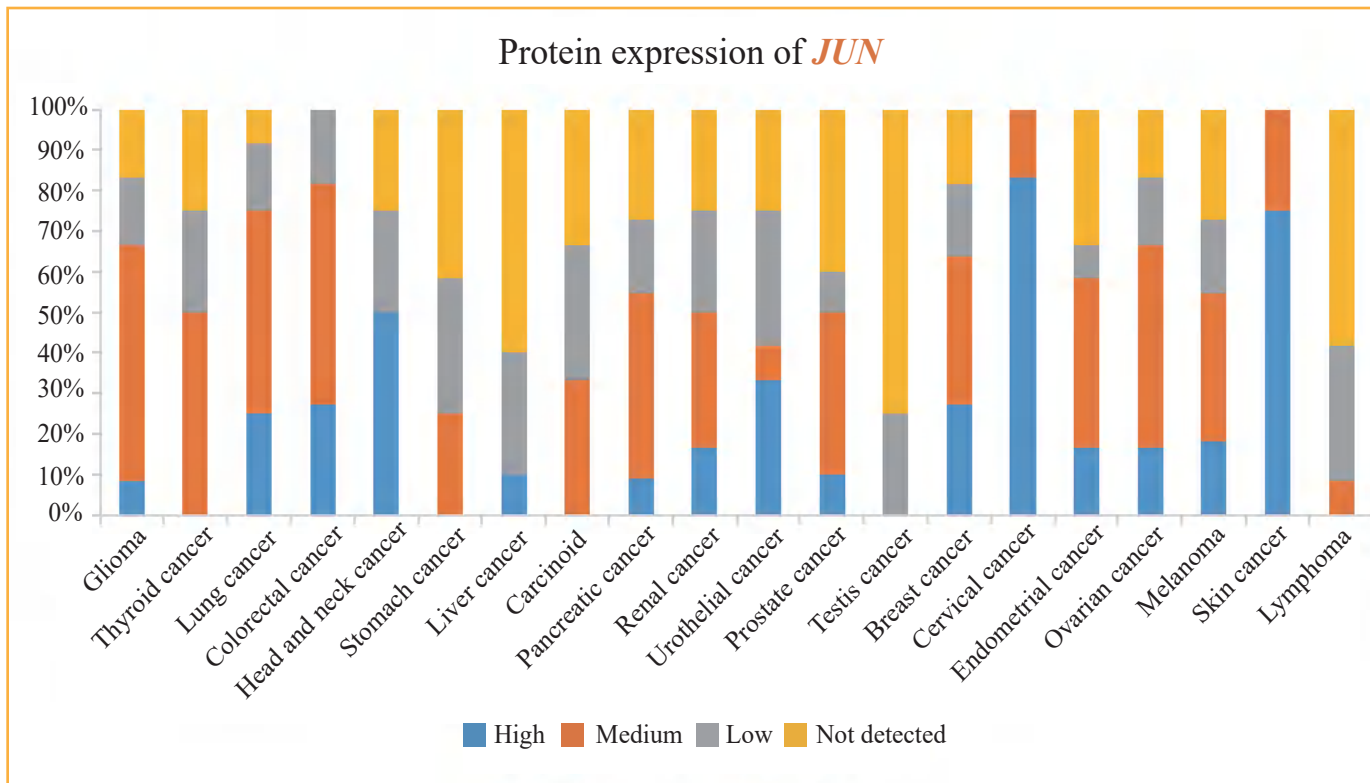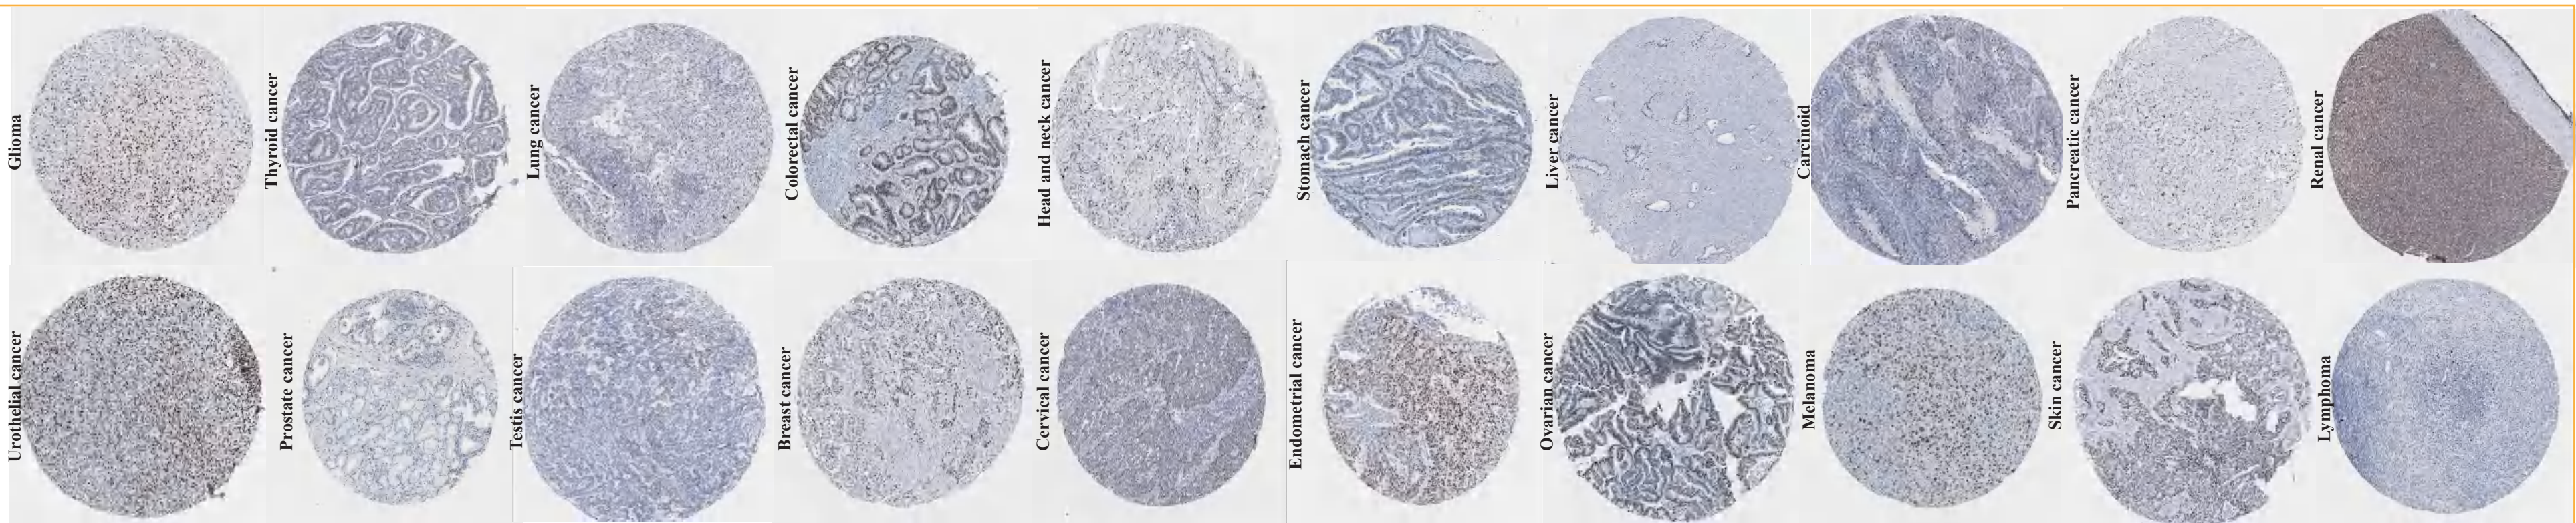**b**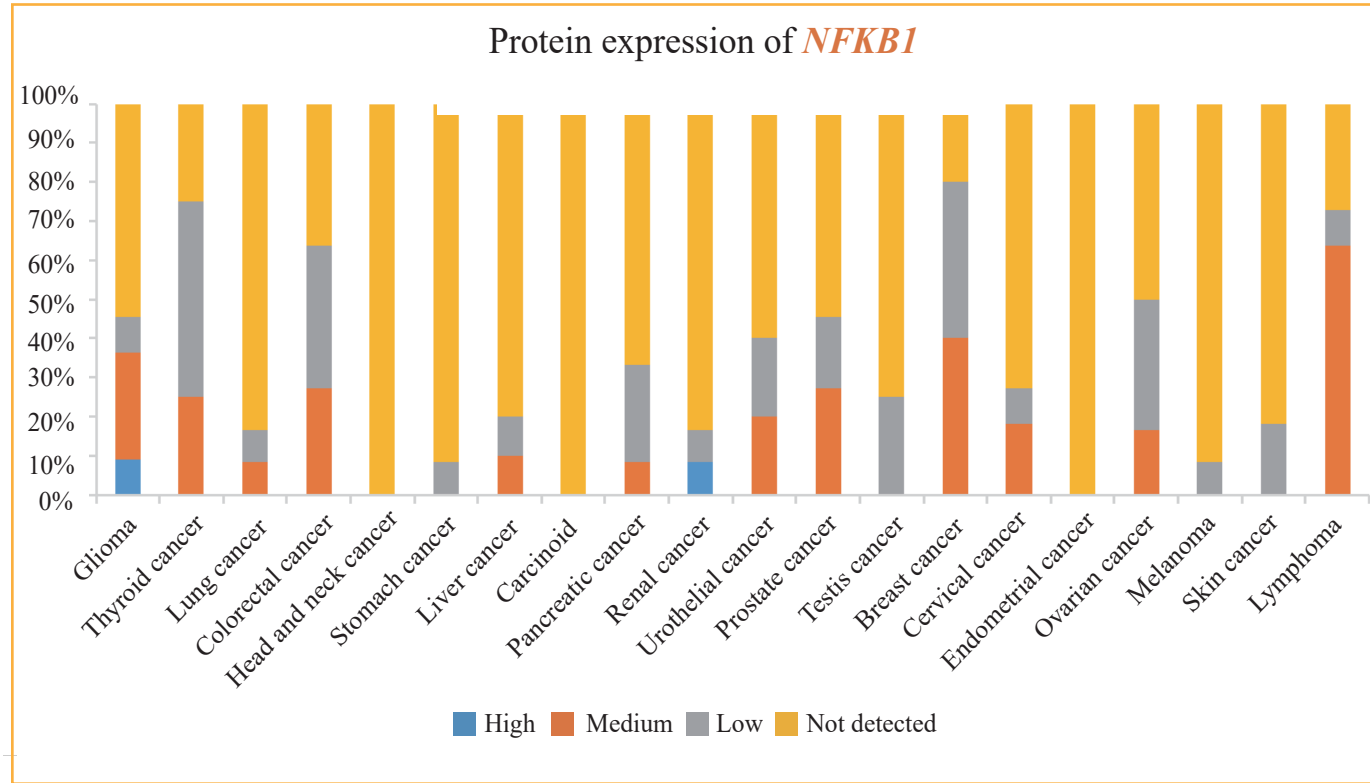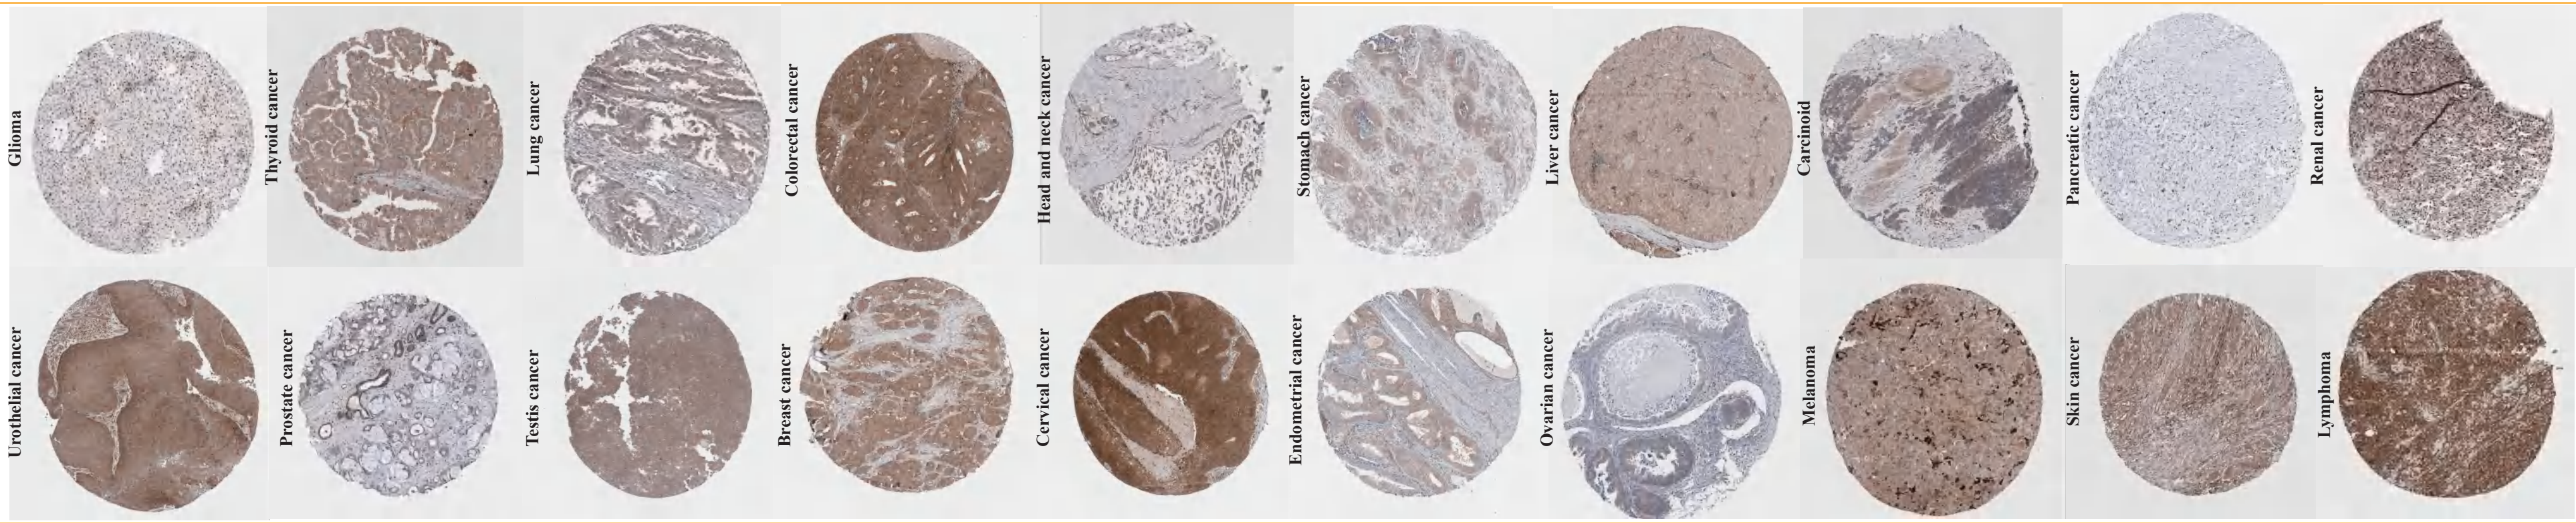**c**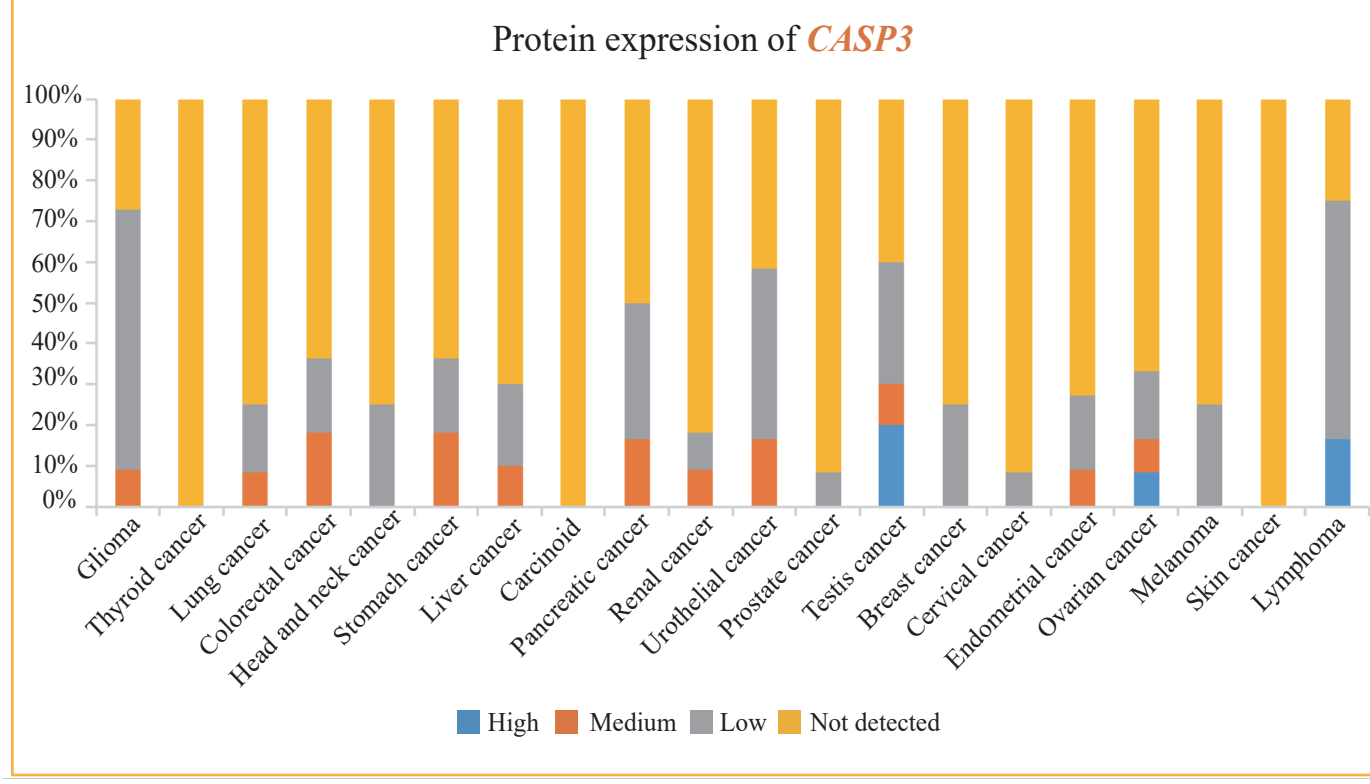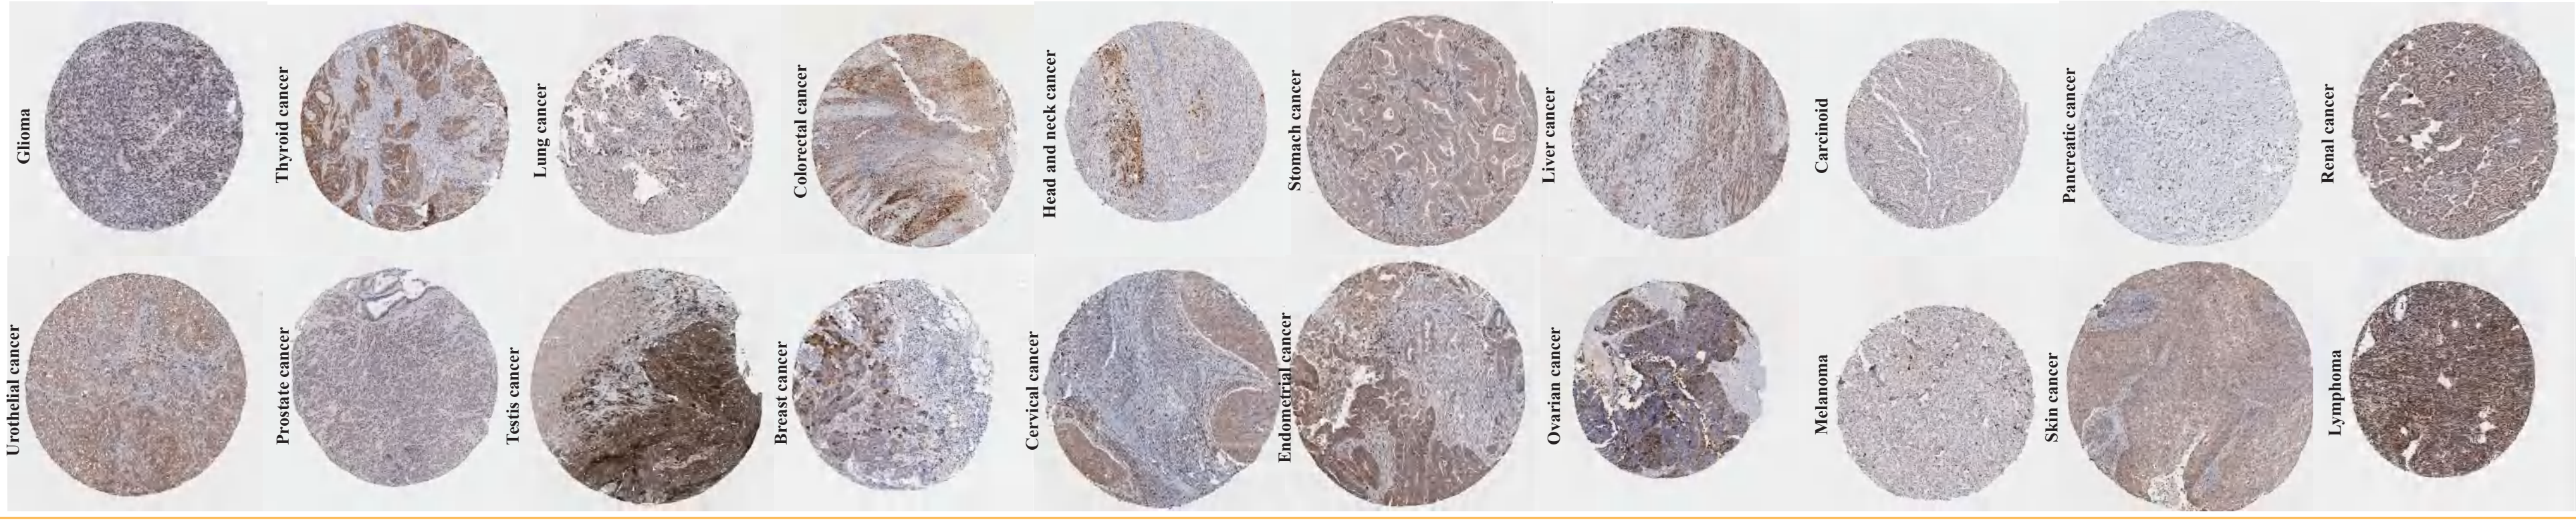**d**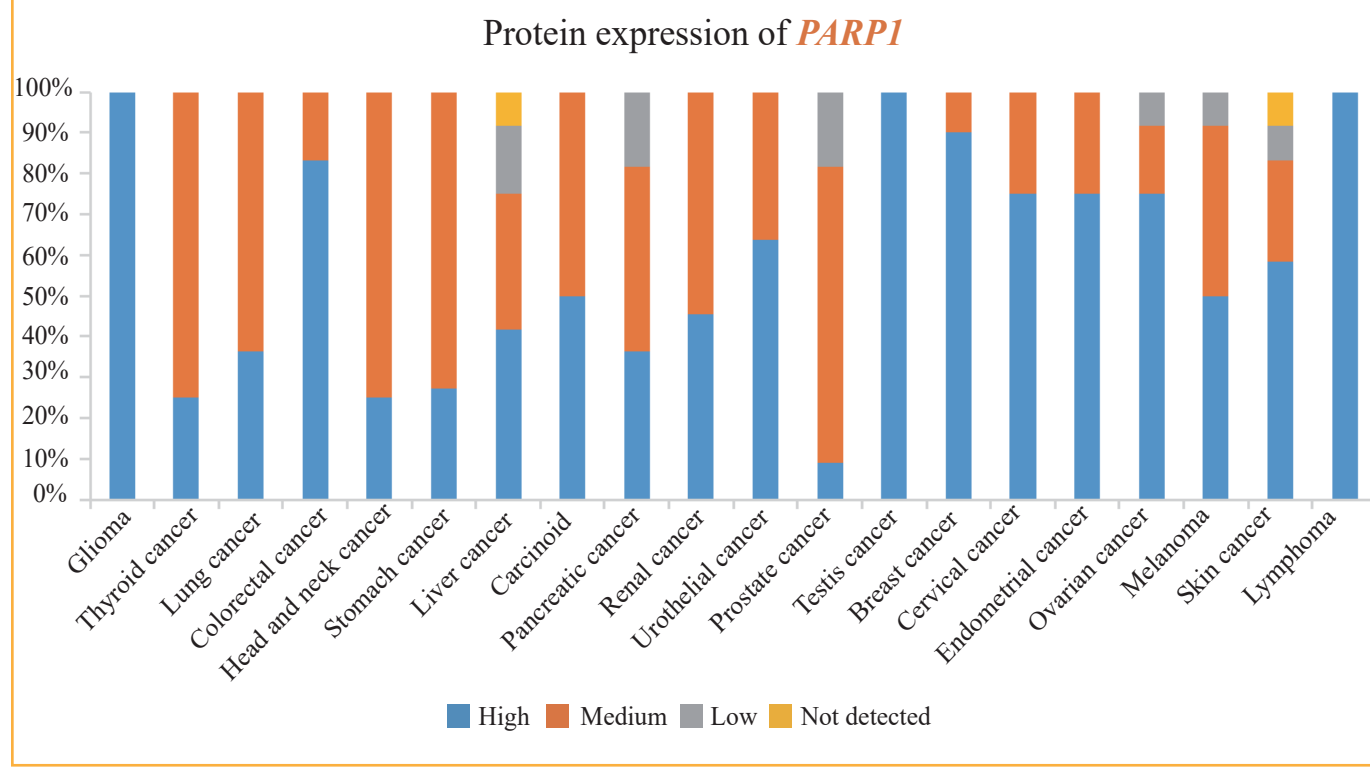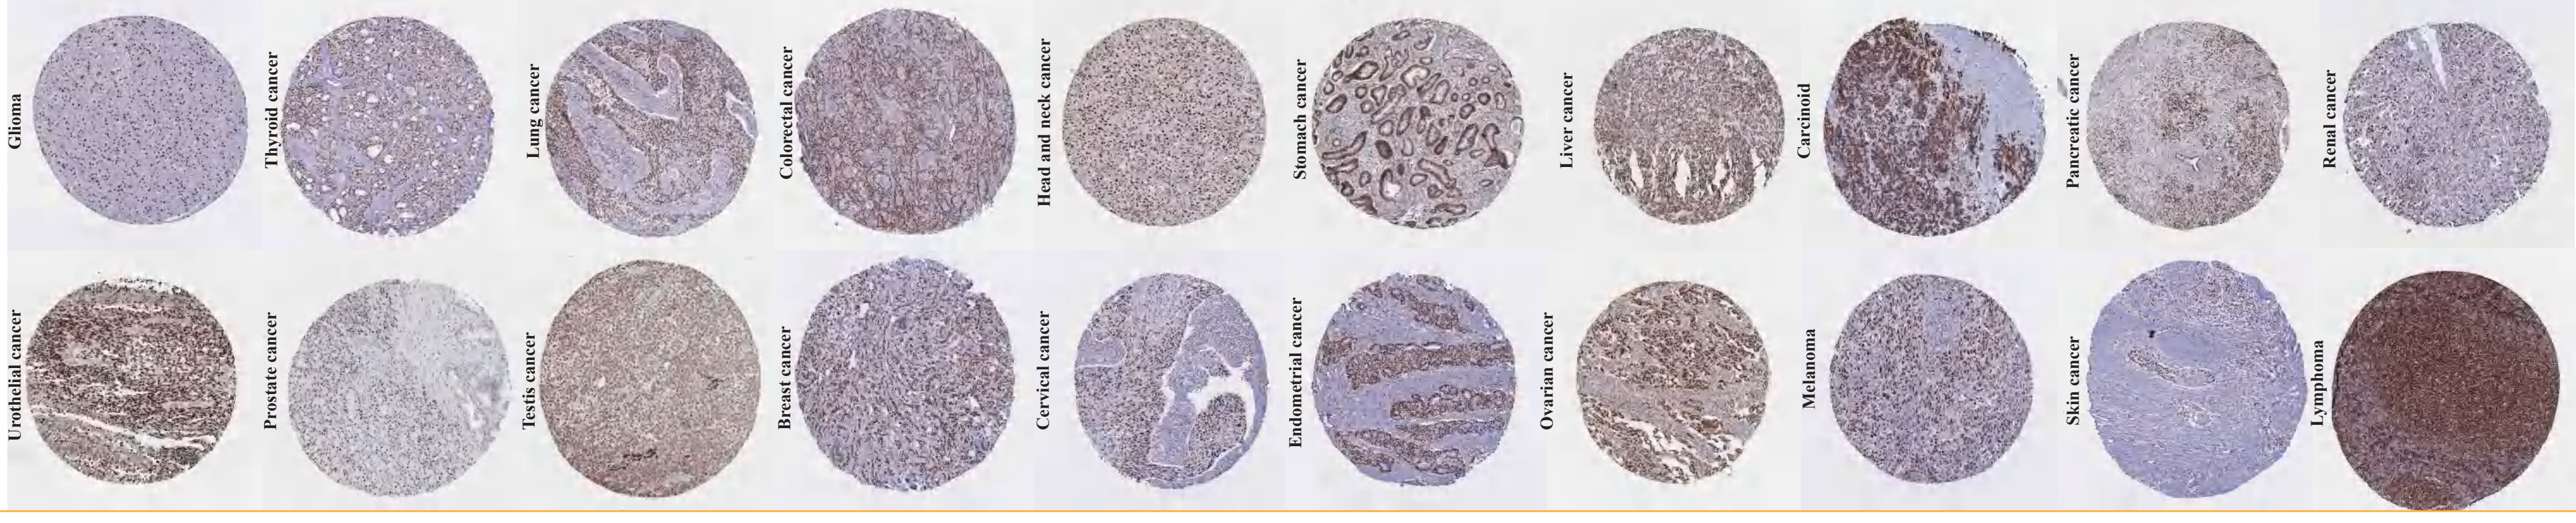**e**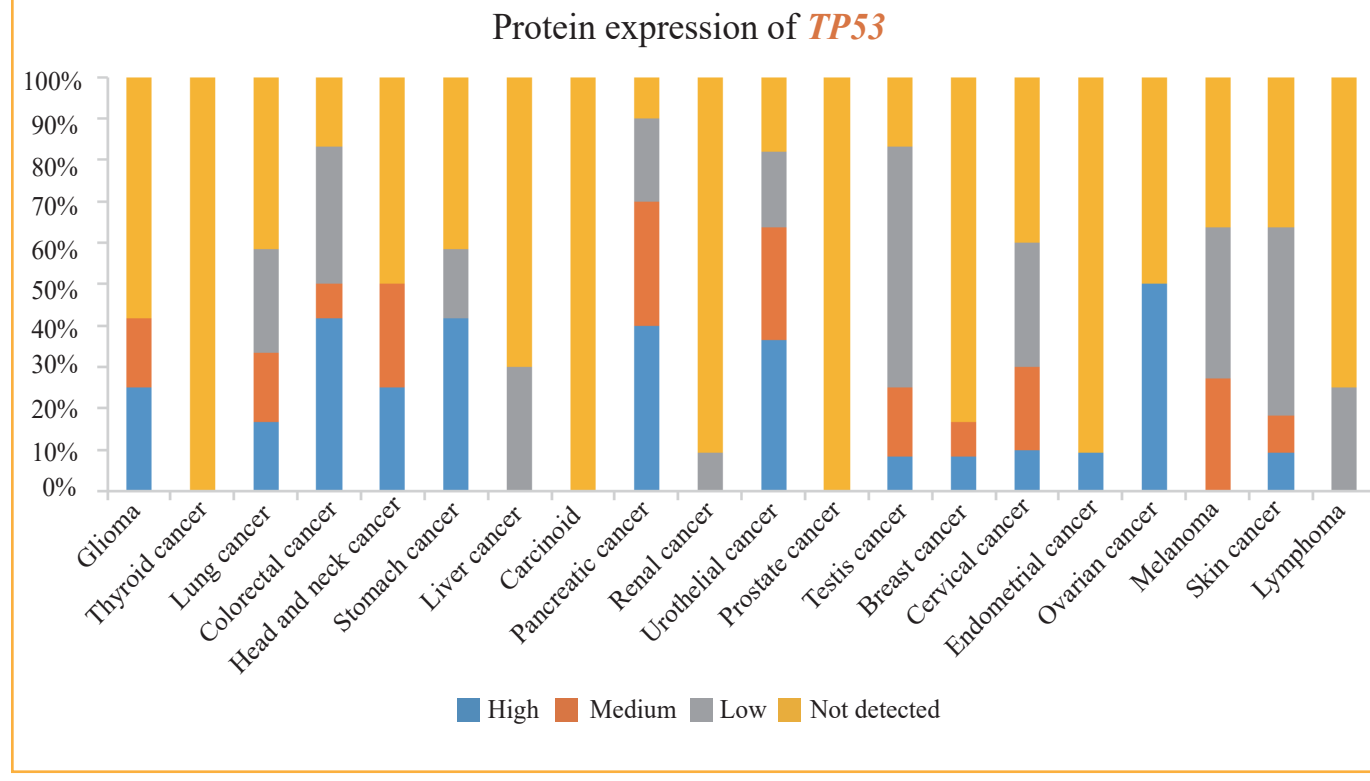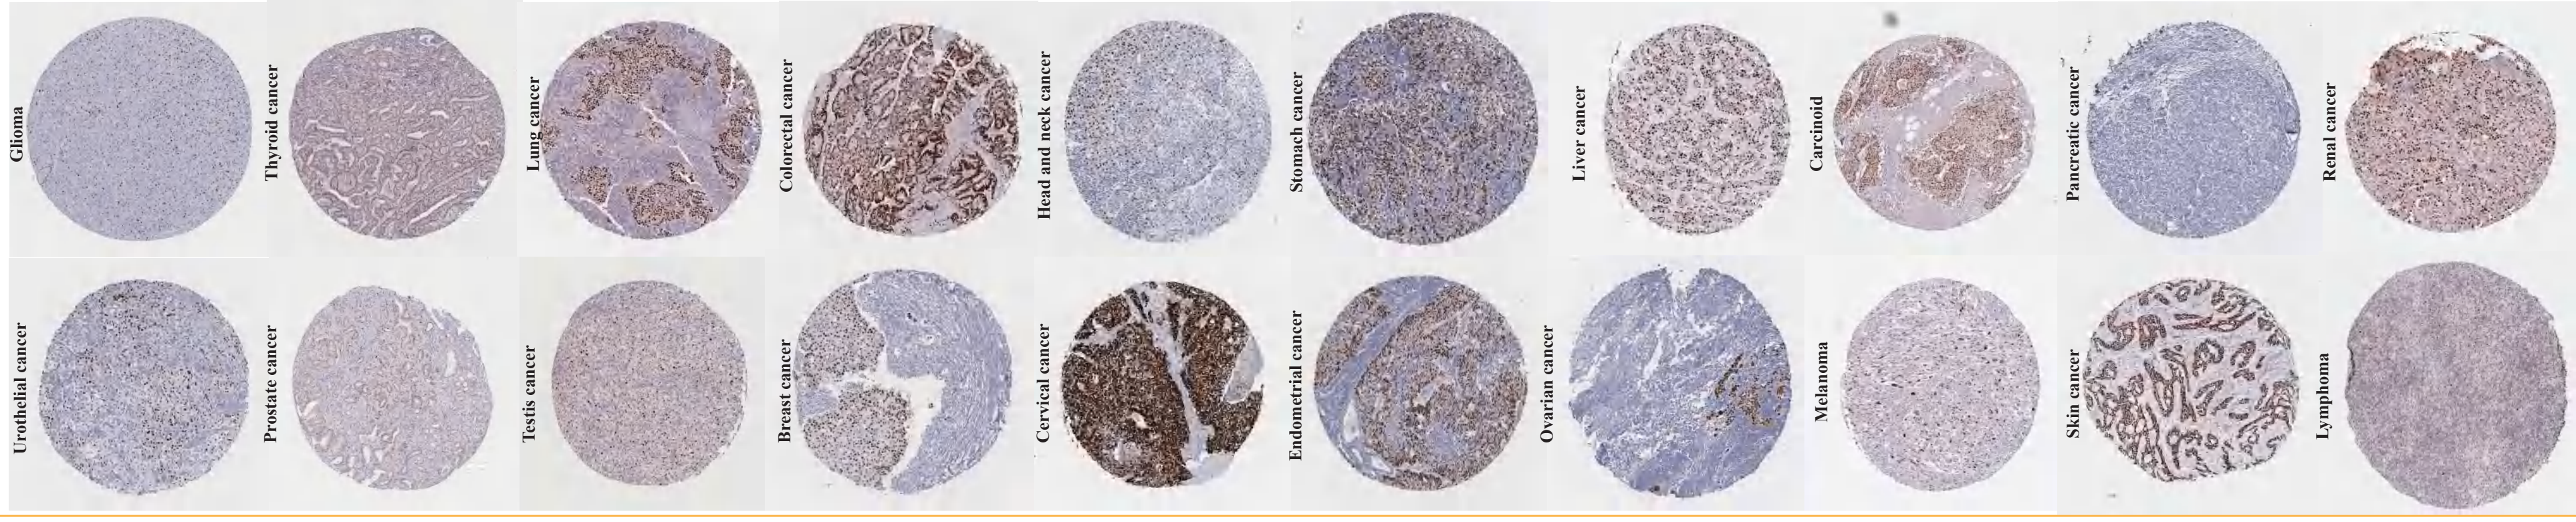

Supplement: Supplementary file 1 [file 1]

**a**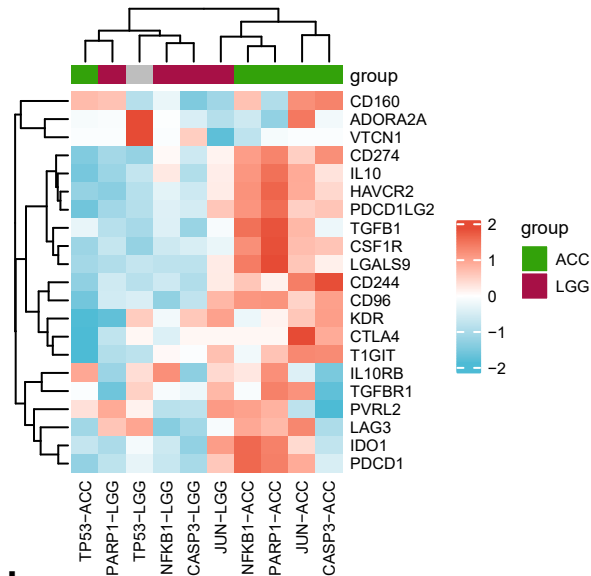**b**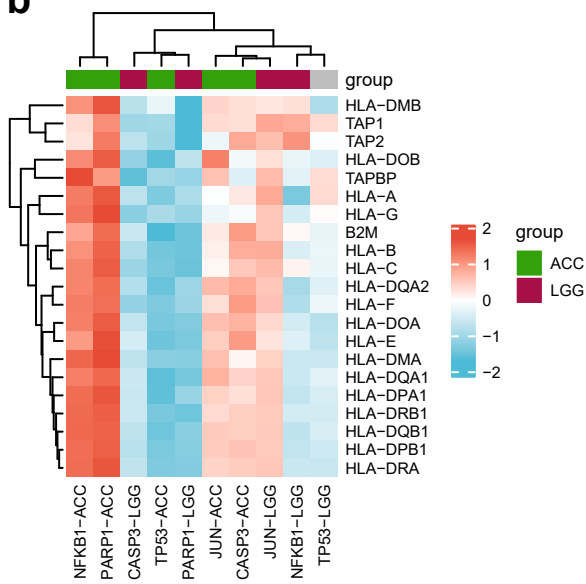**c**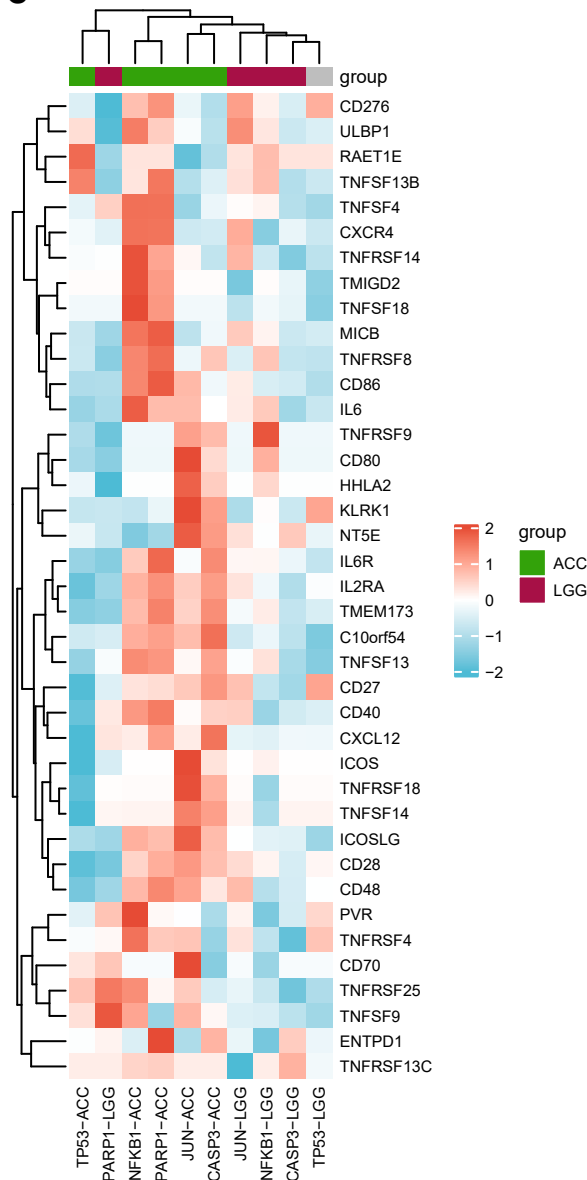

Supplement: Supplementary file 2 [file 1]

**a**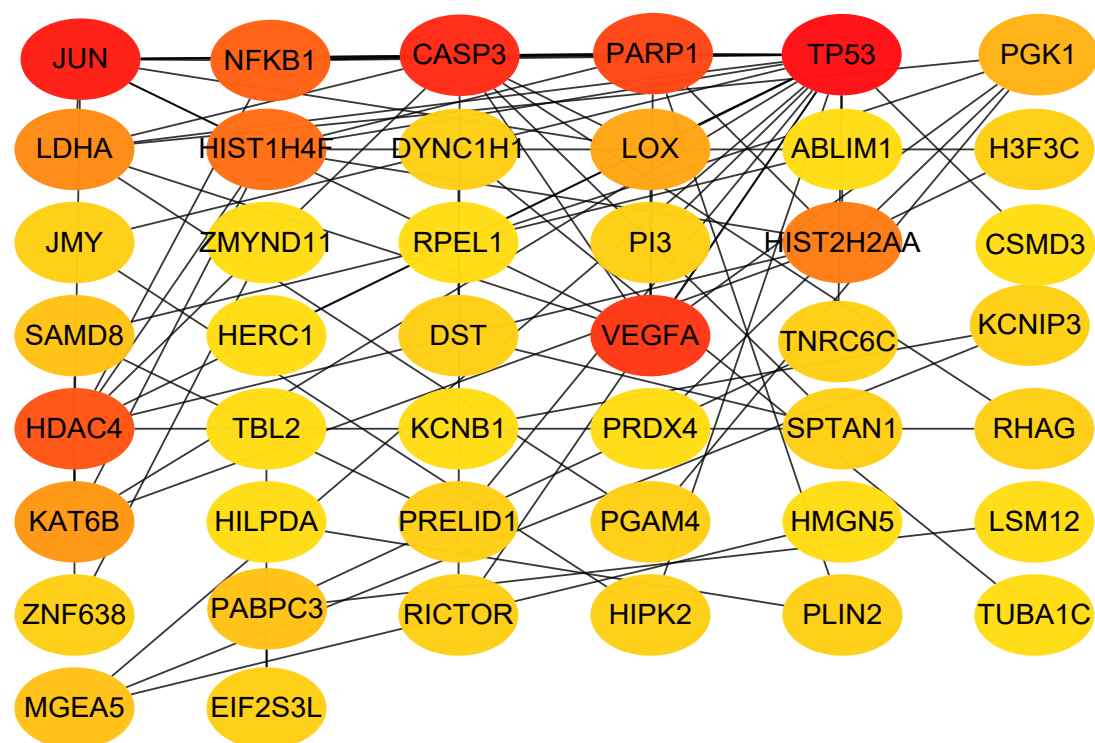**b**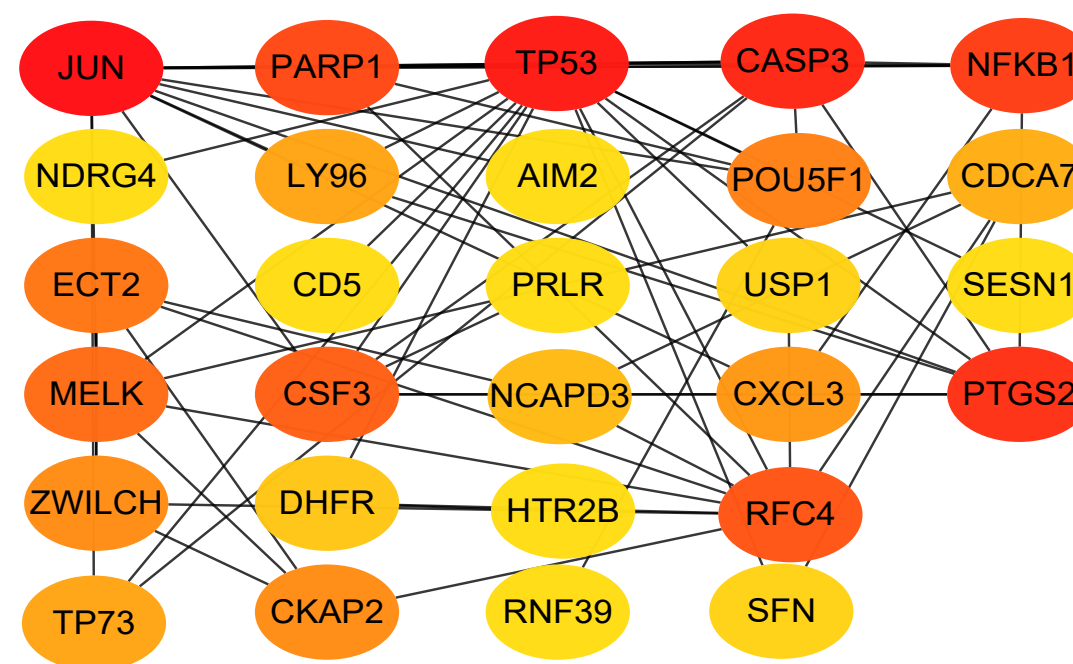**c**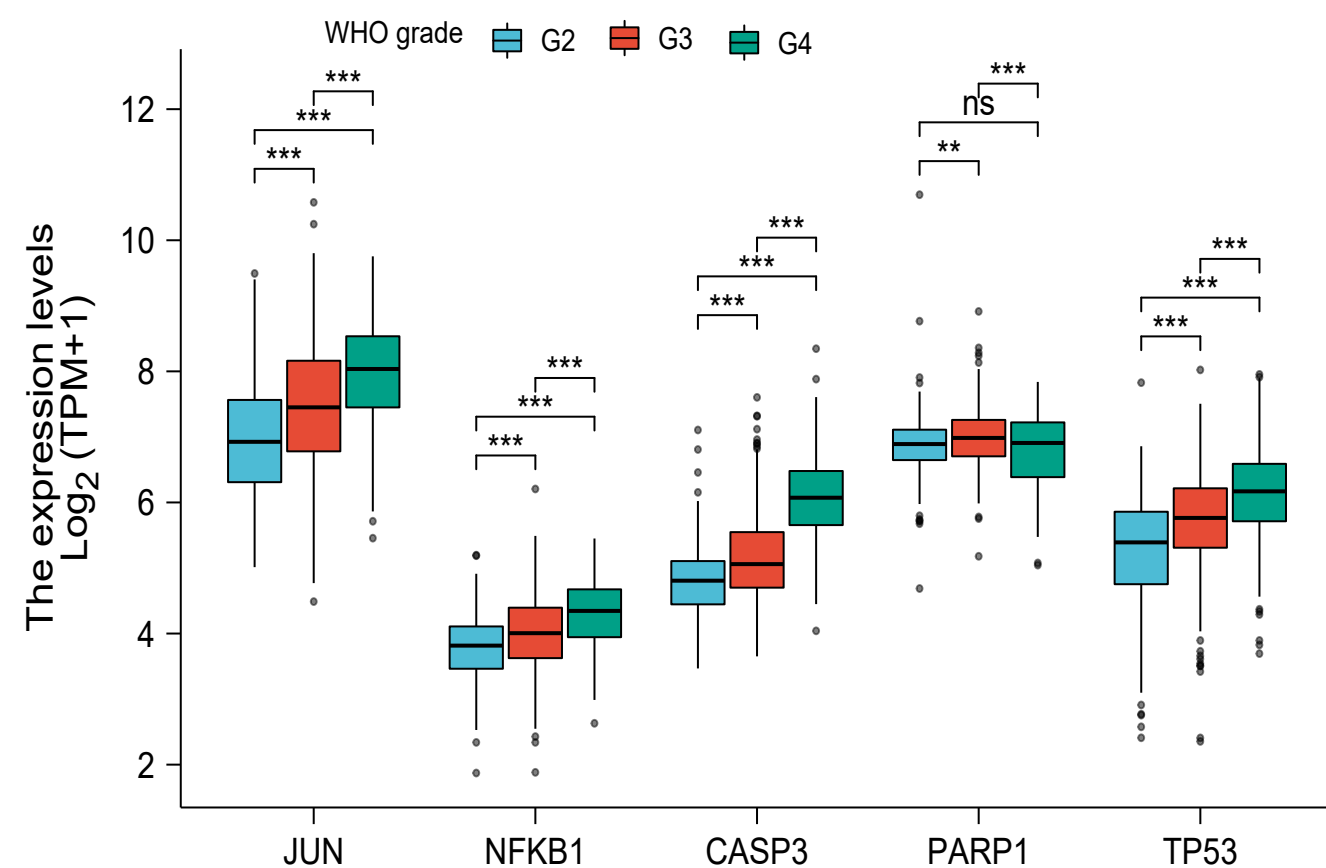**d**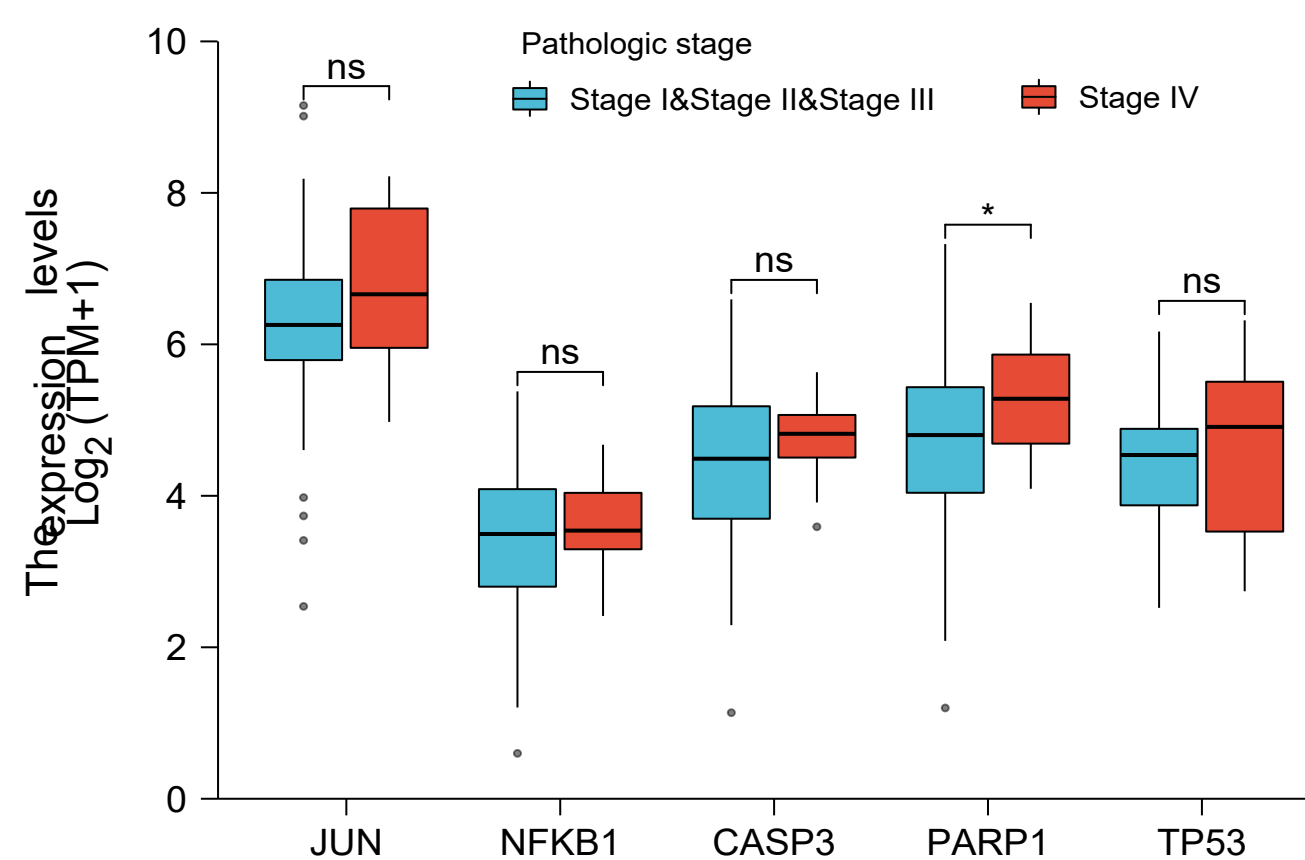

Supplement: Supplementary file 3 [file 1]

a

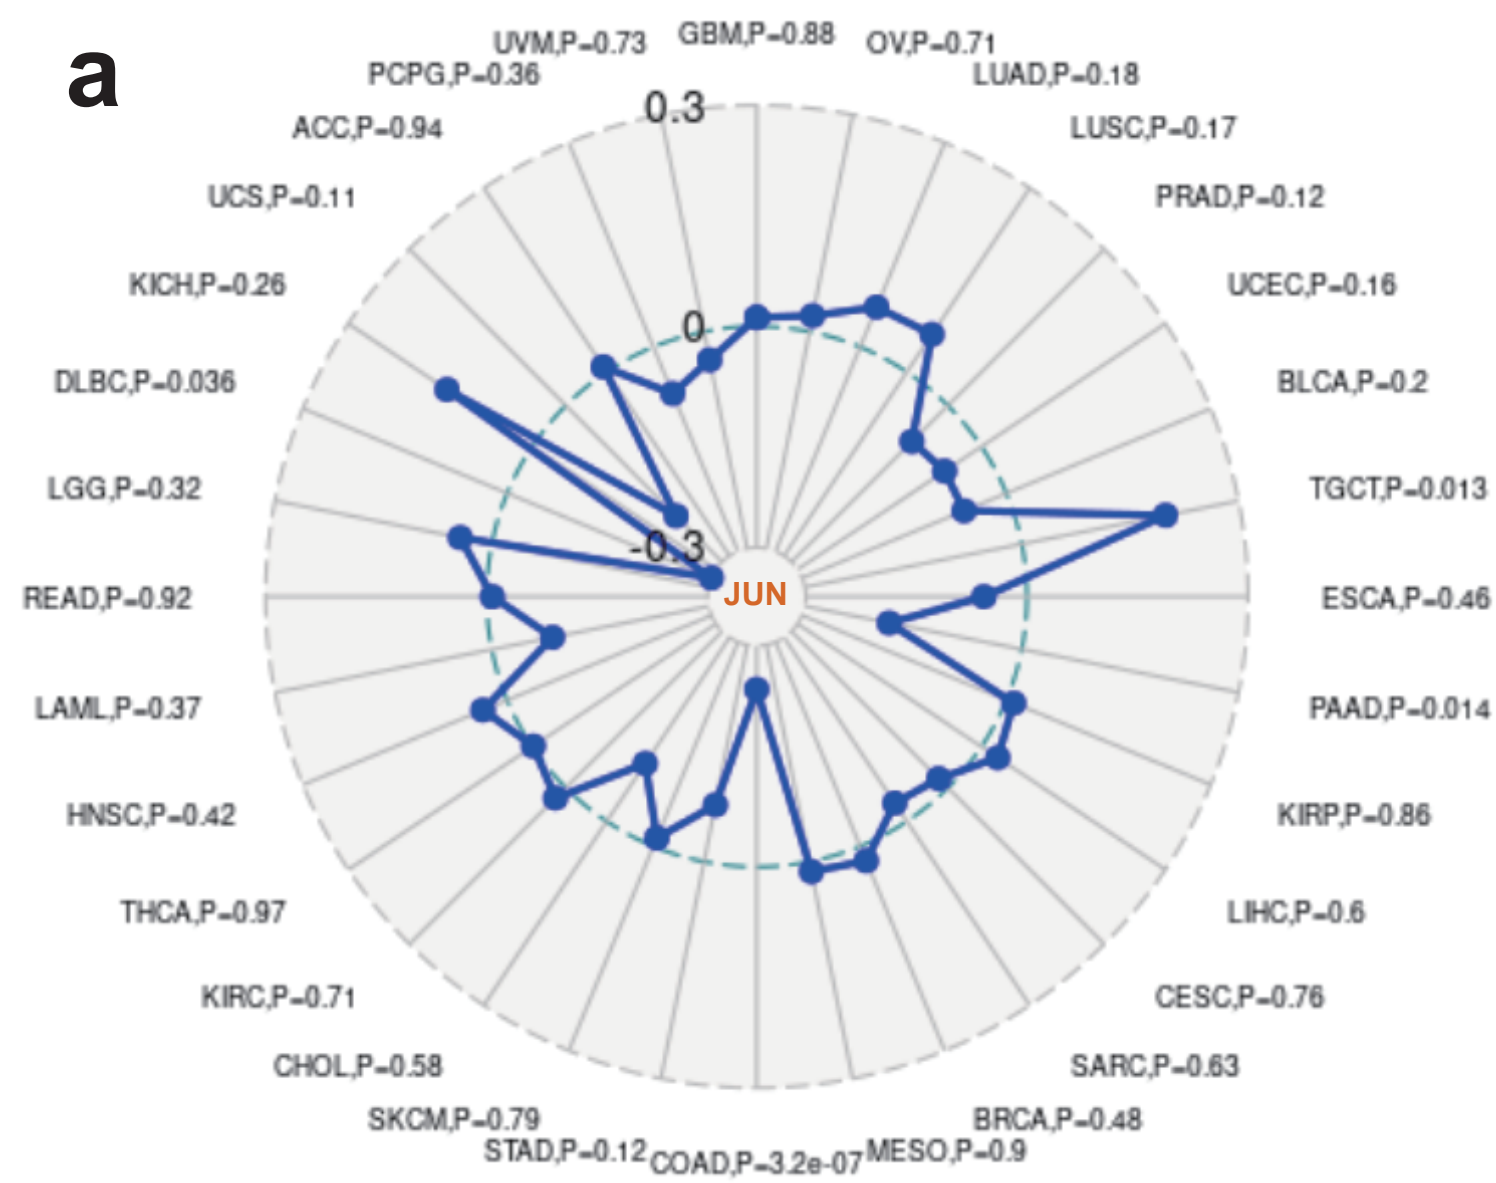

b

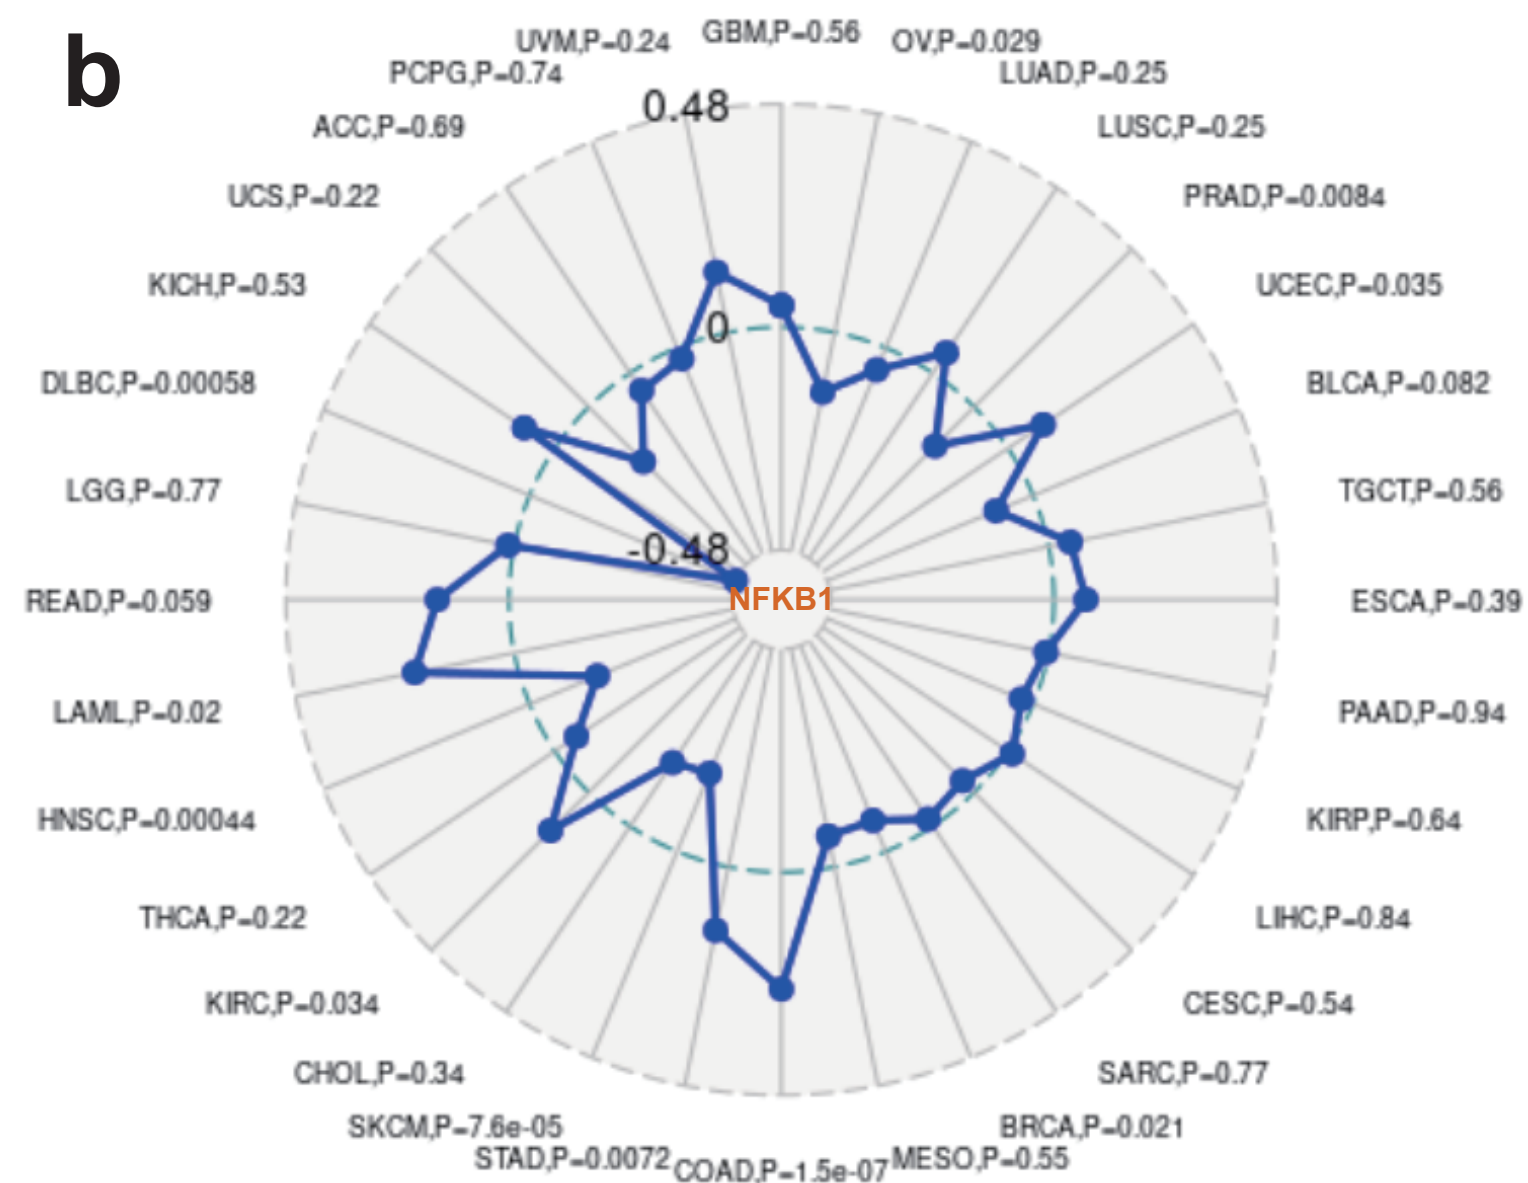

c

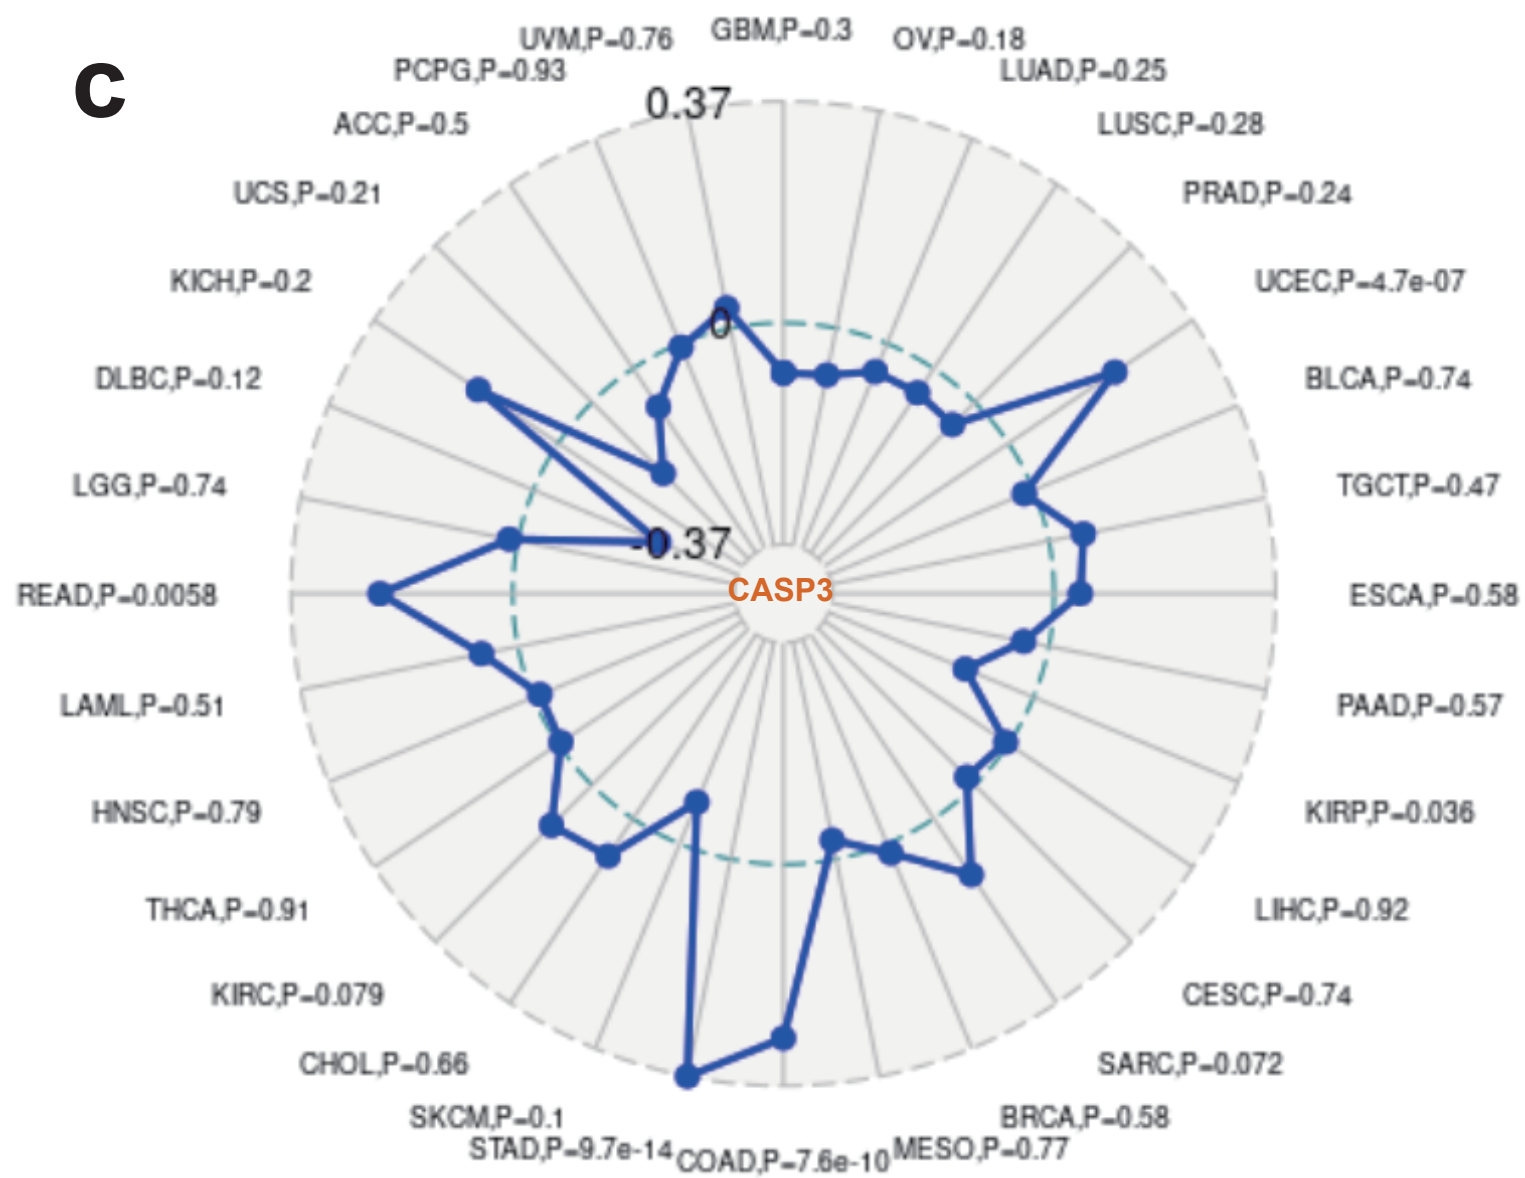

d

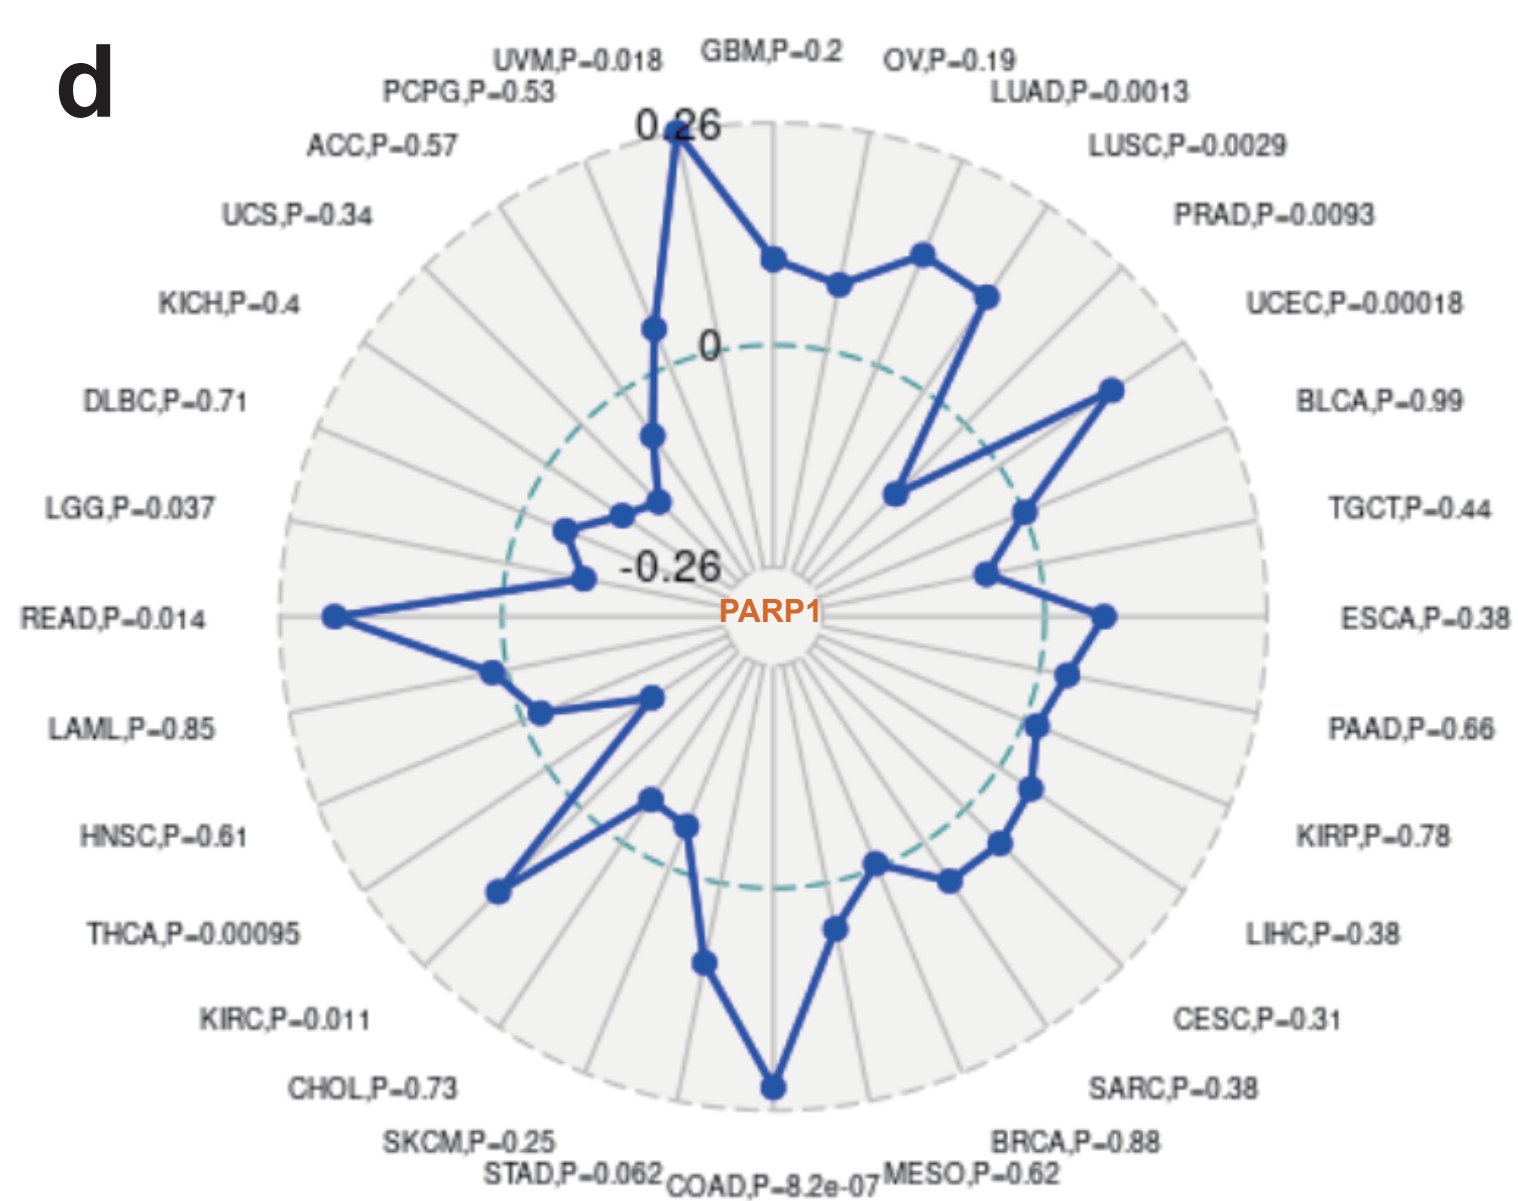

e

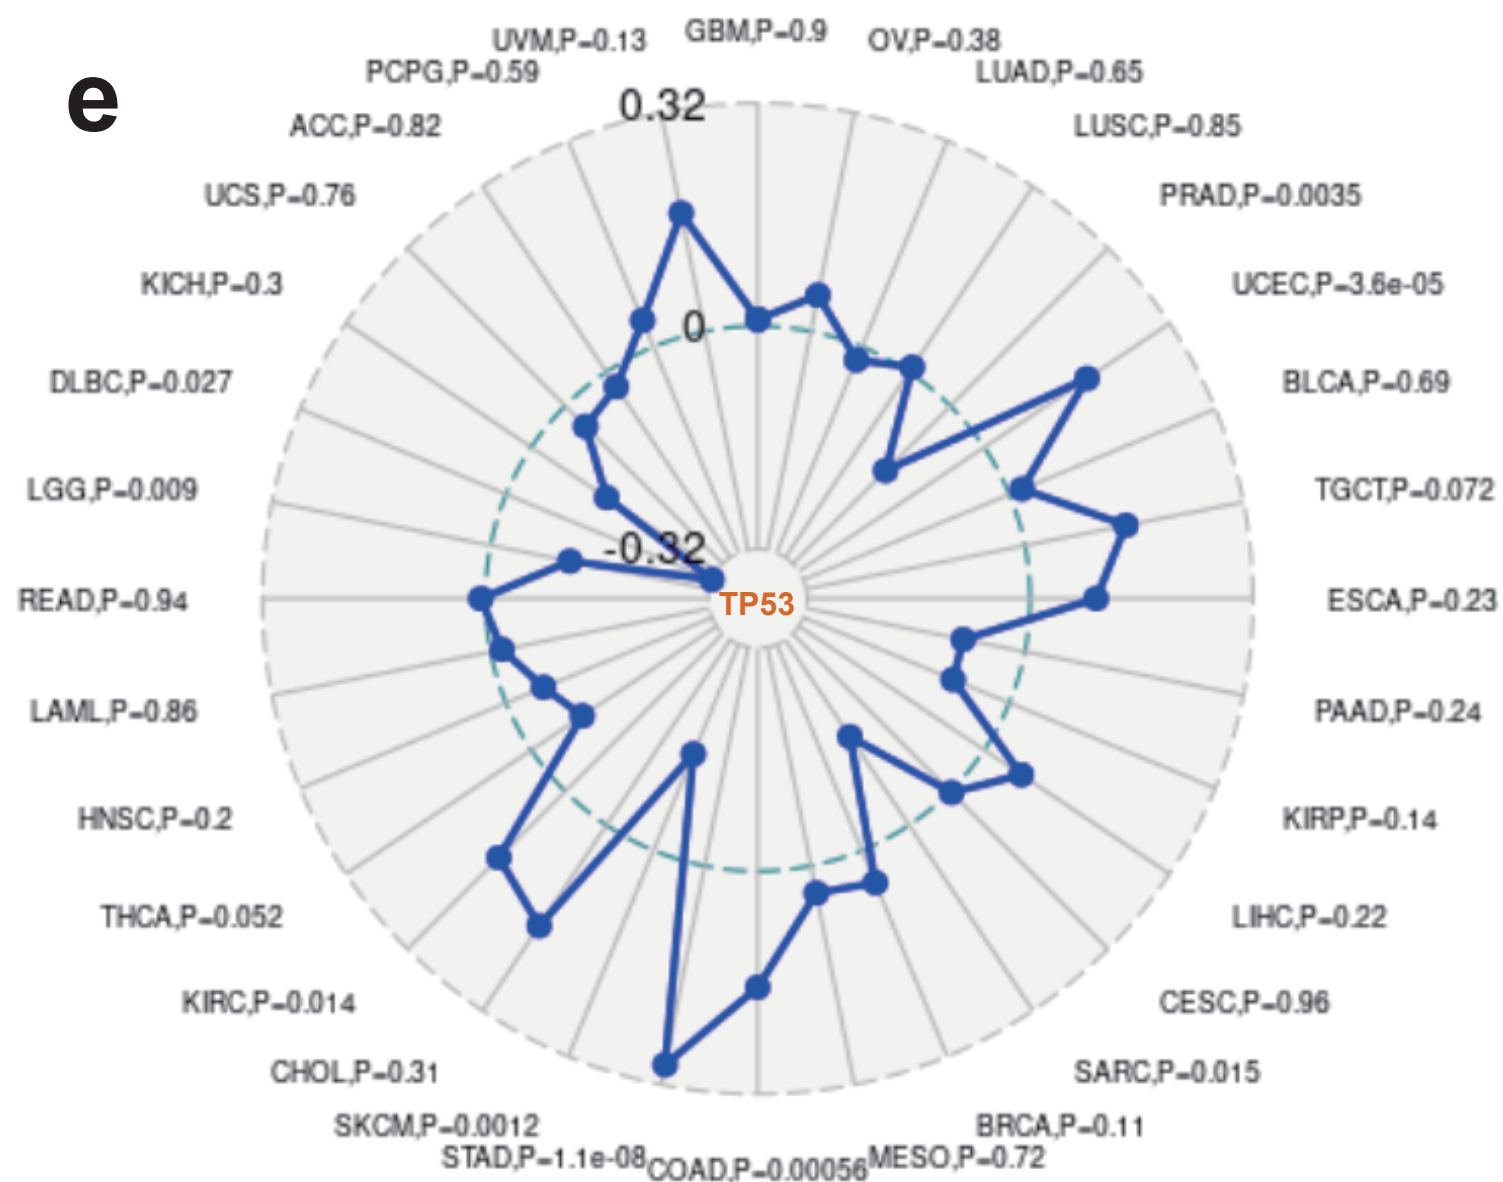

Supplement: Supplementary file 4 [file 1]

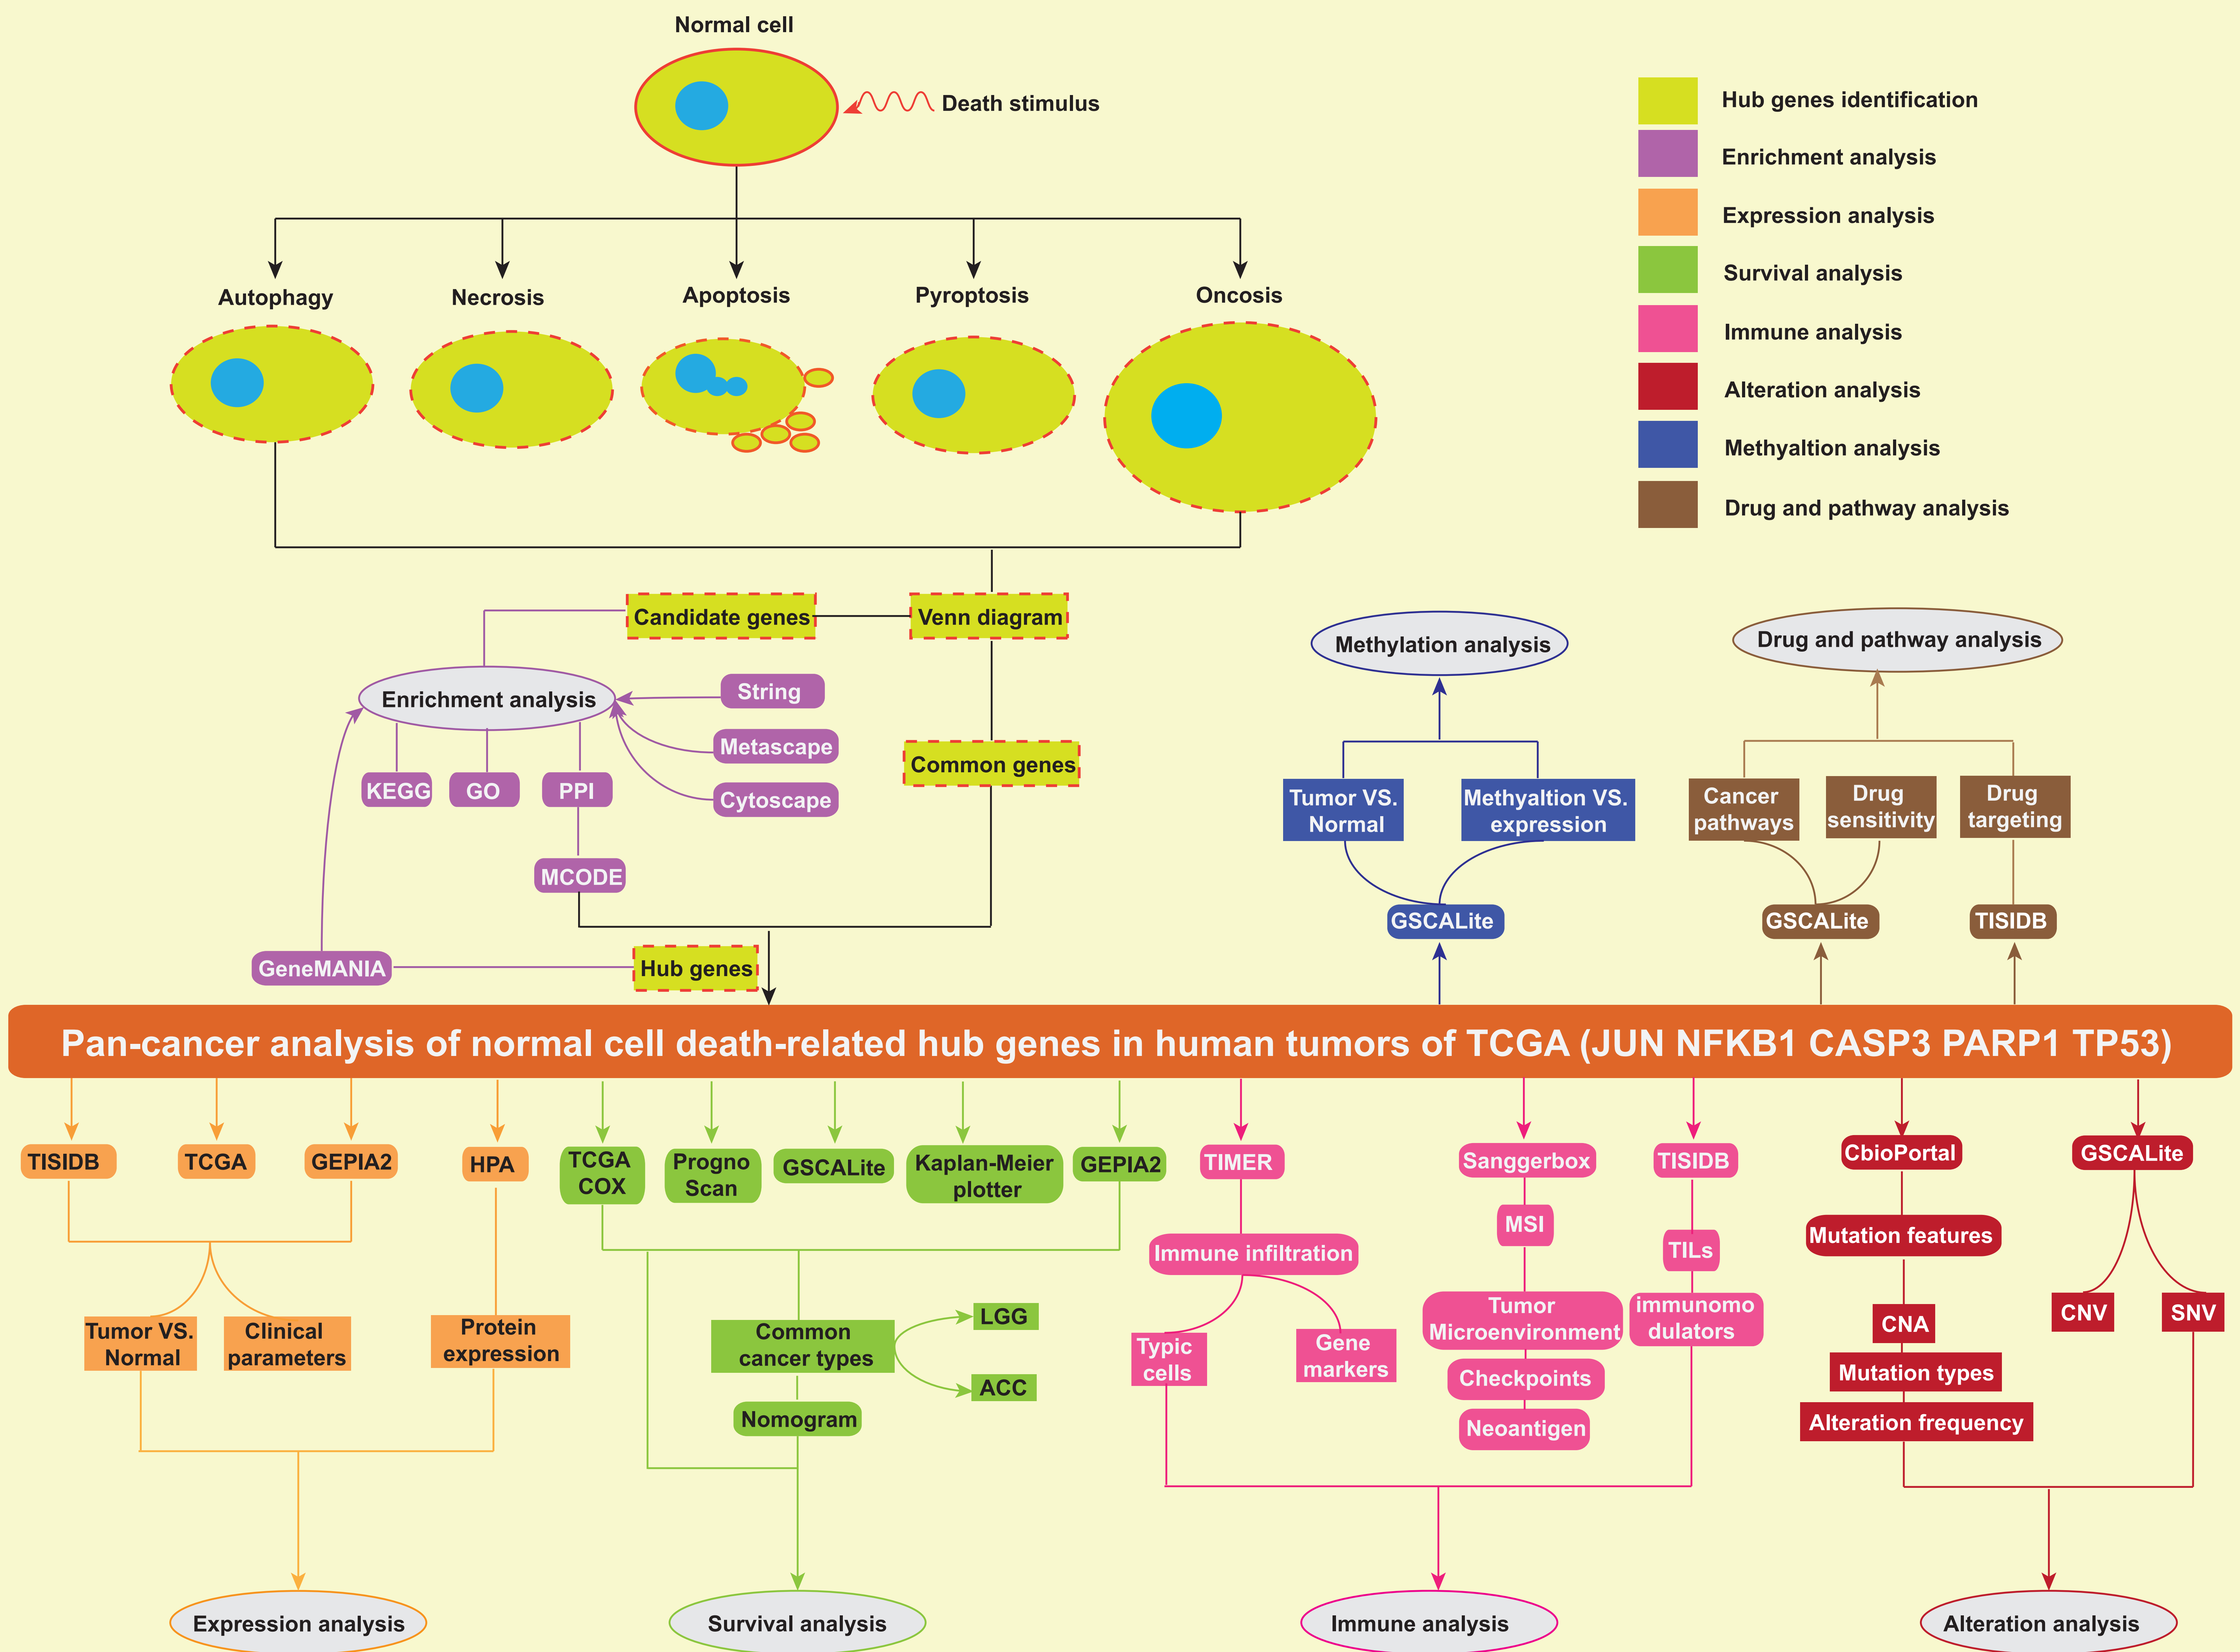

Supplement: Supplementary file 5 [file 1]

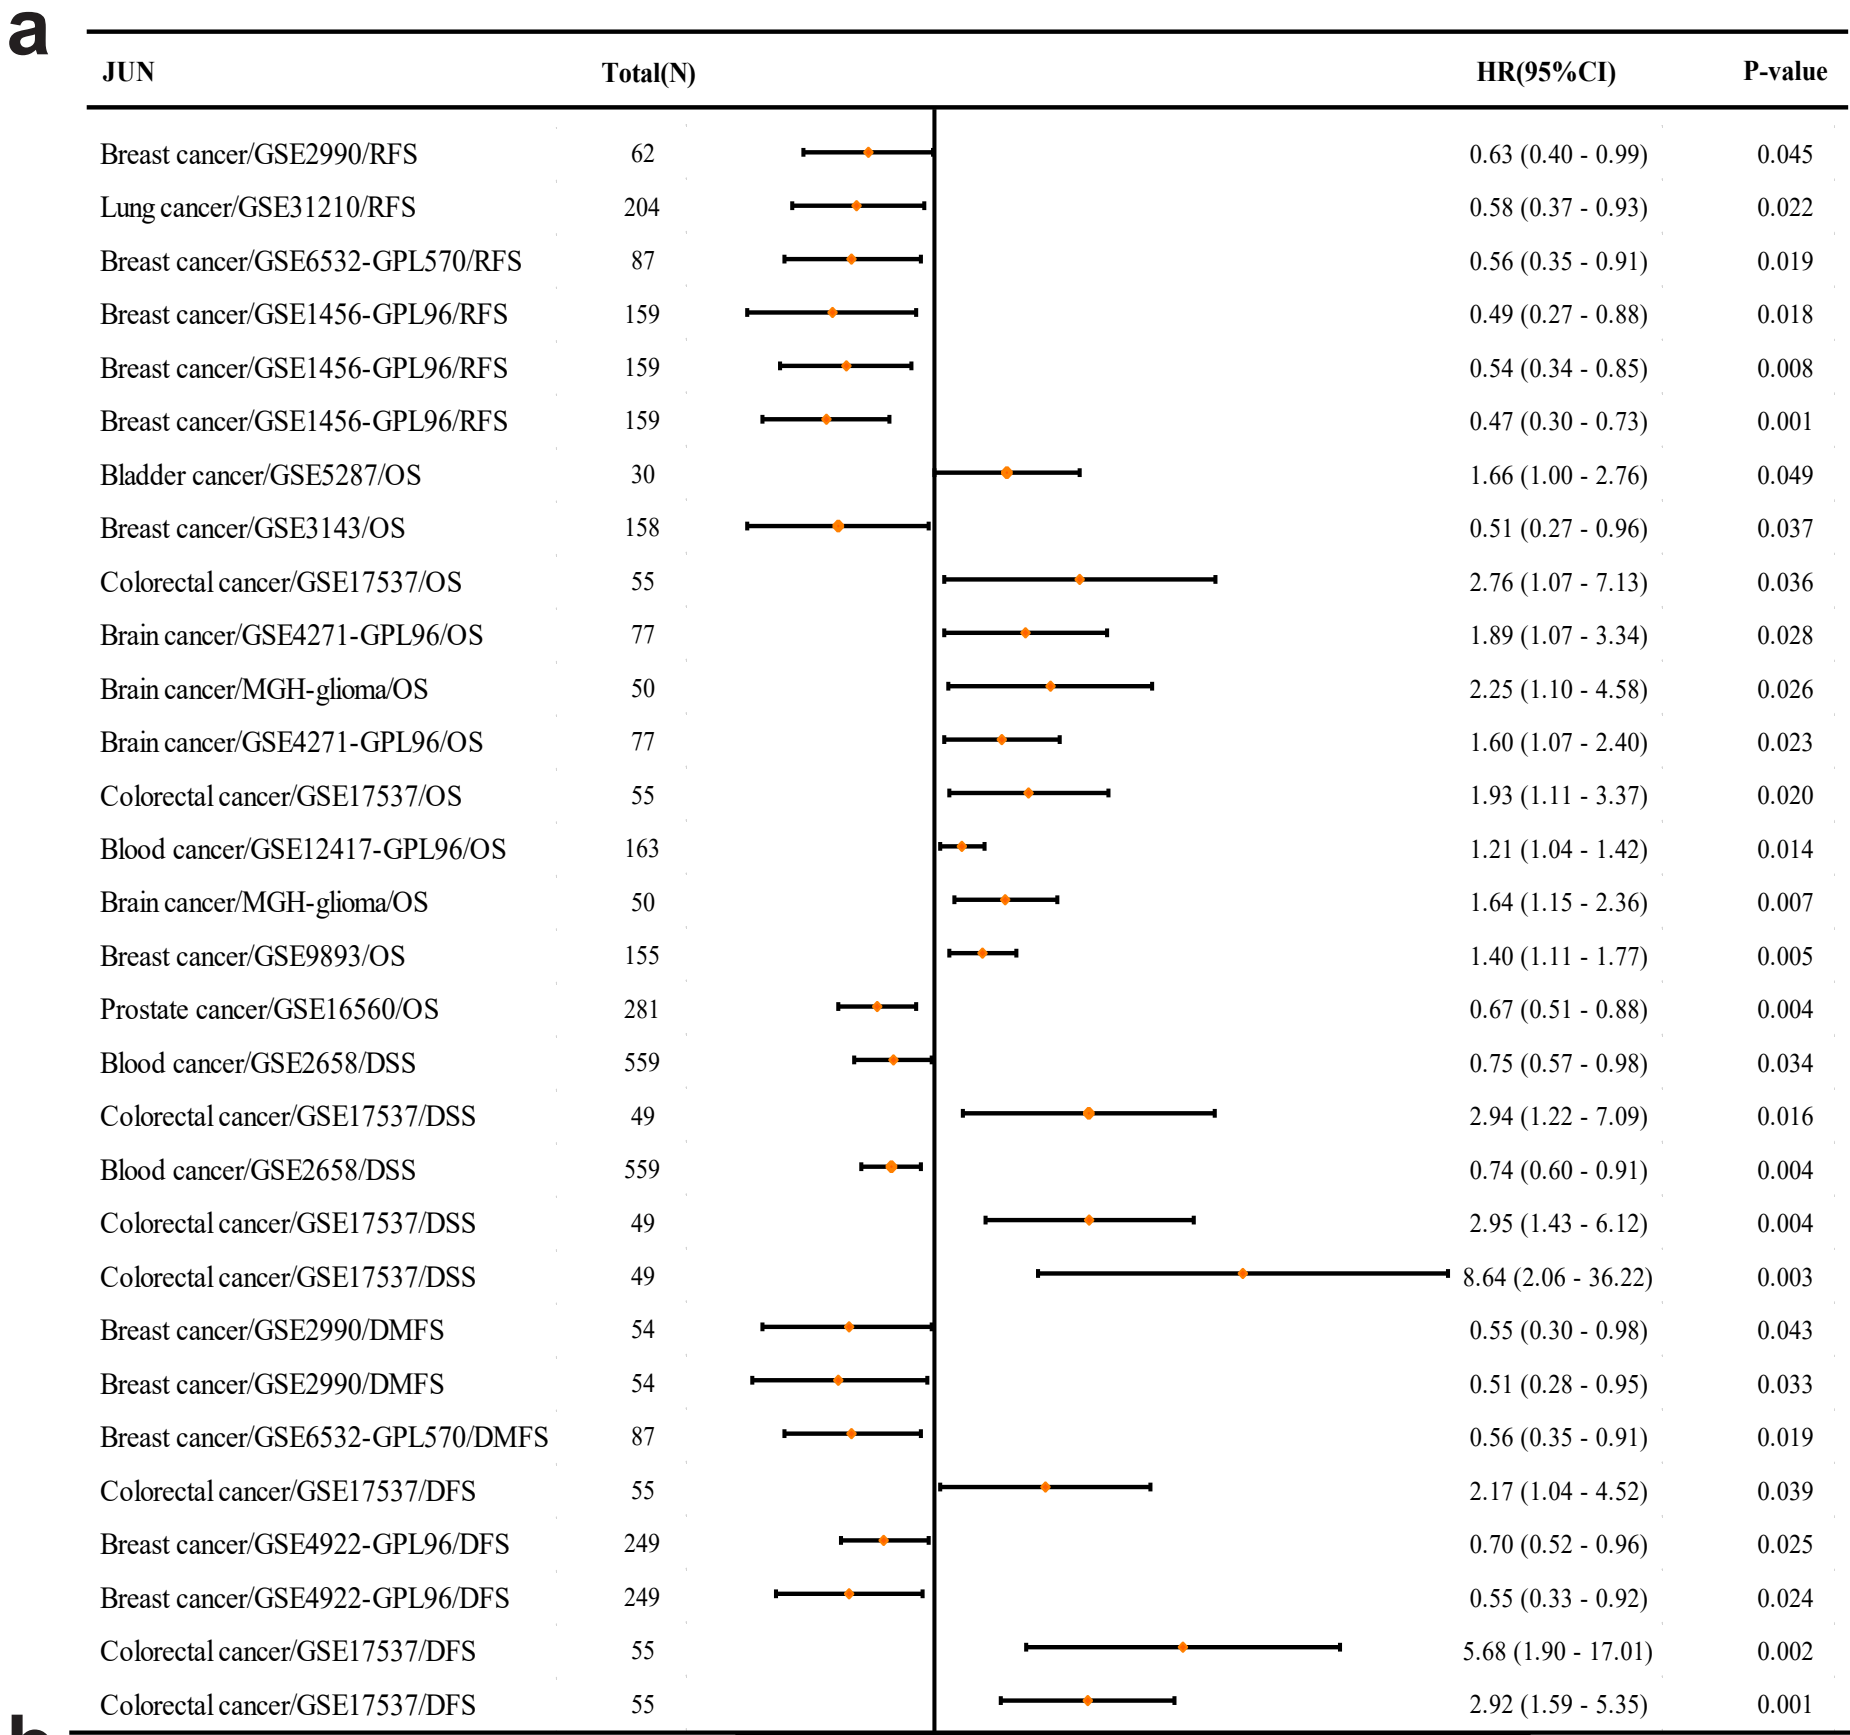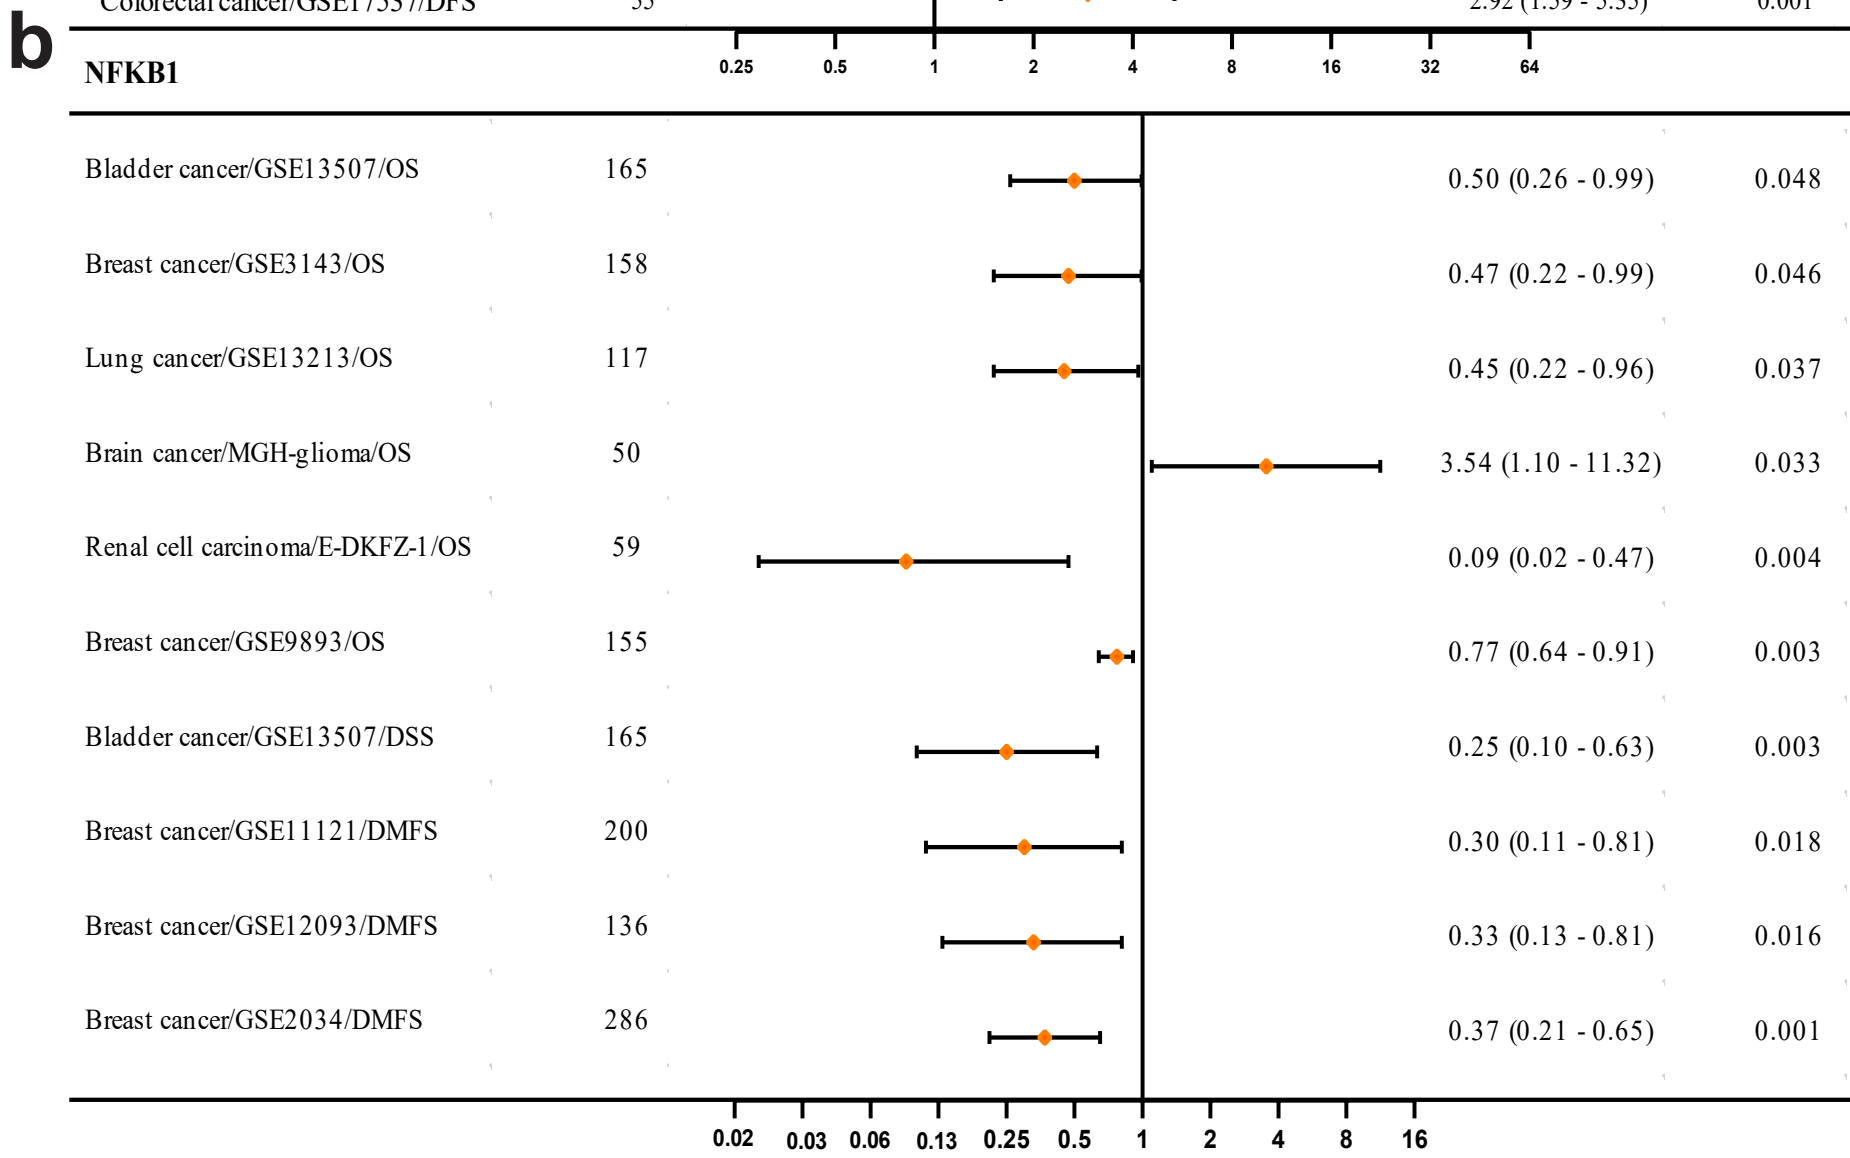

Hazard ratio

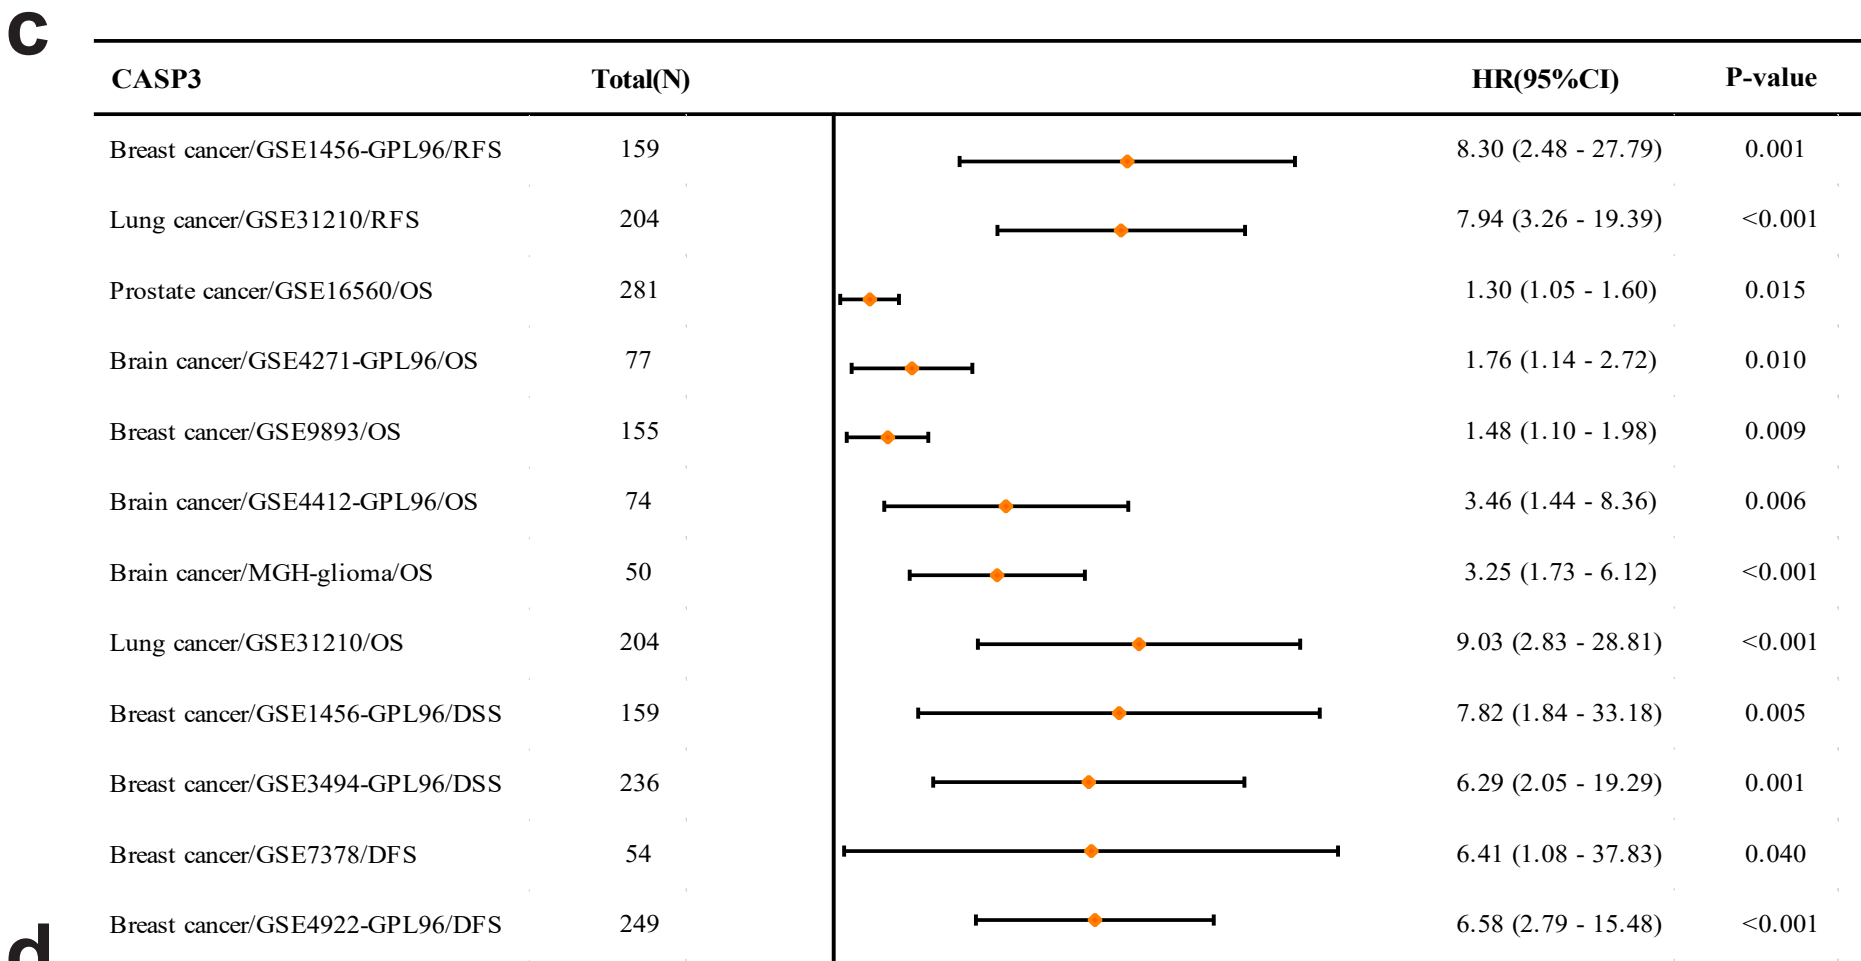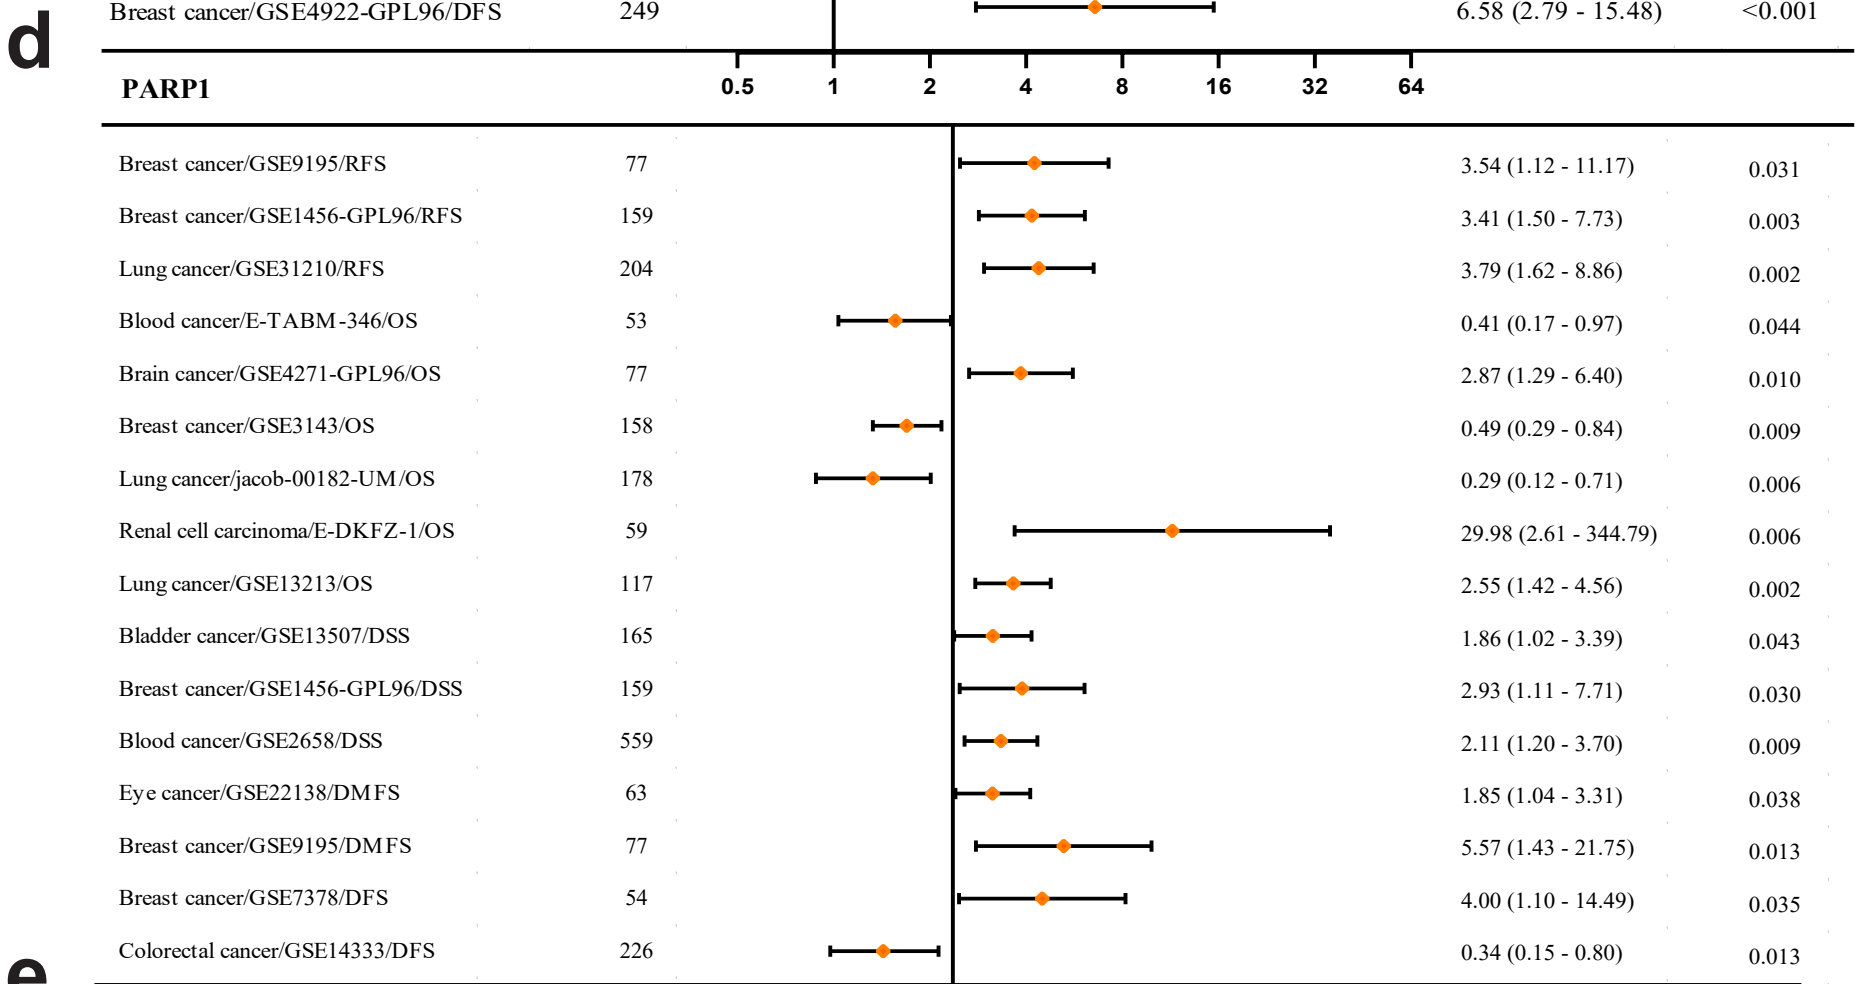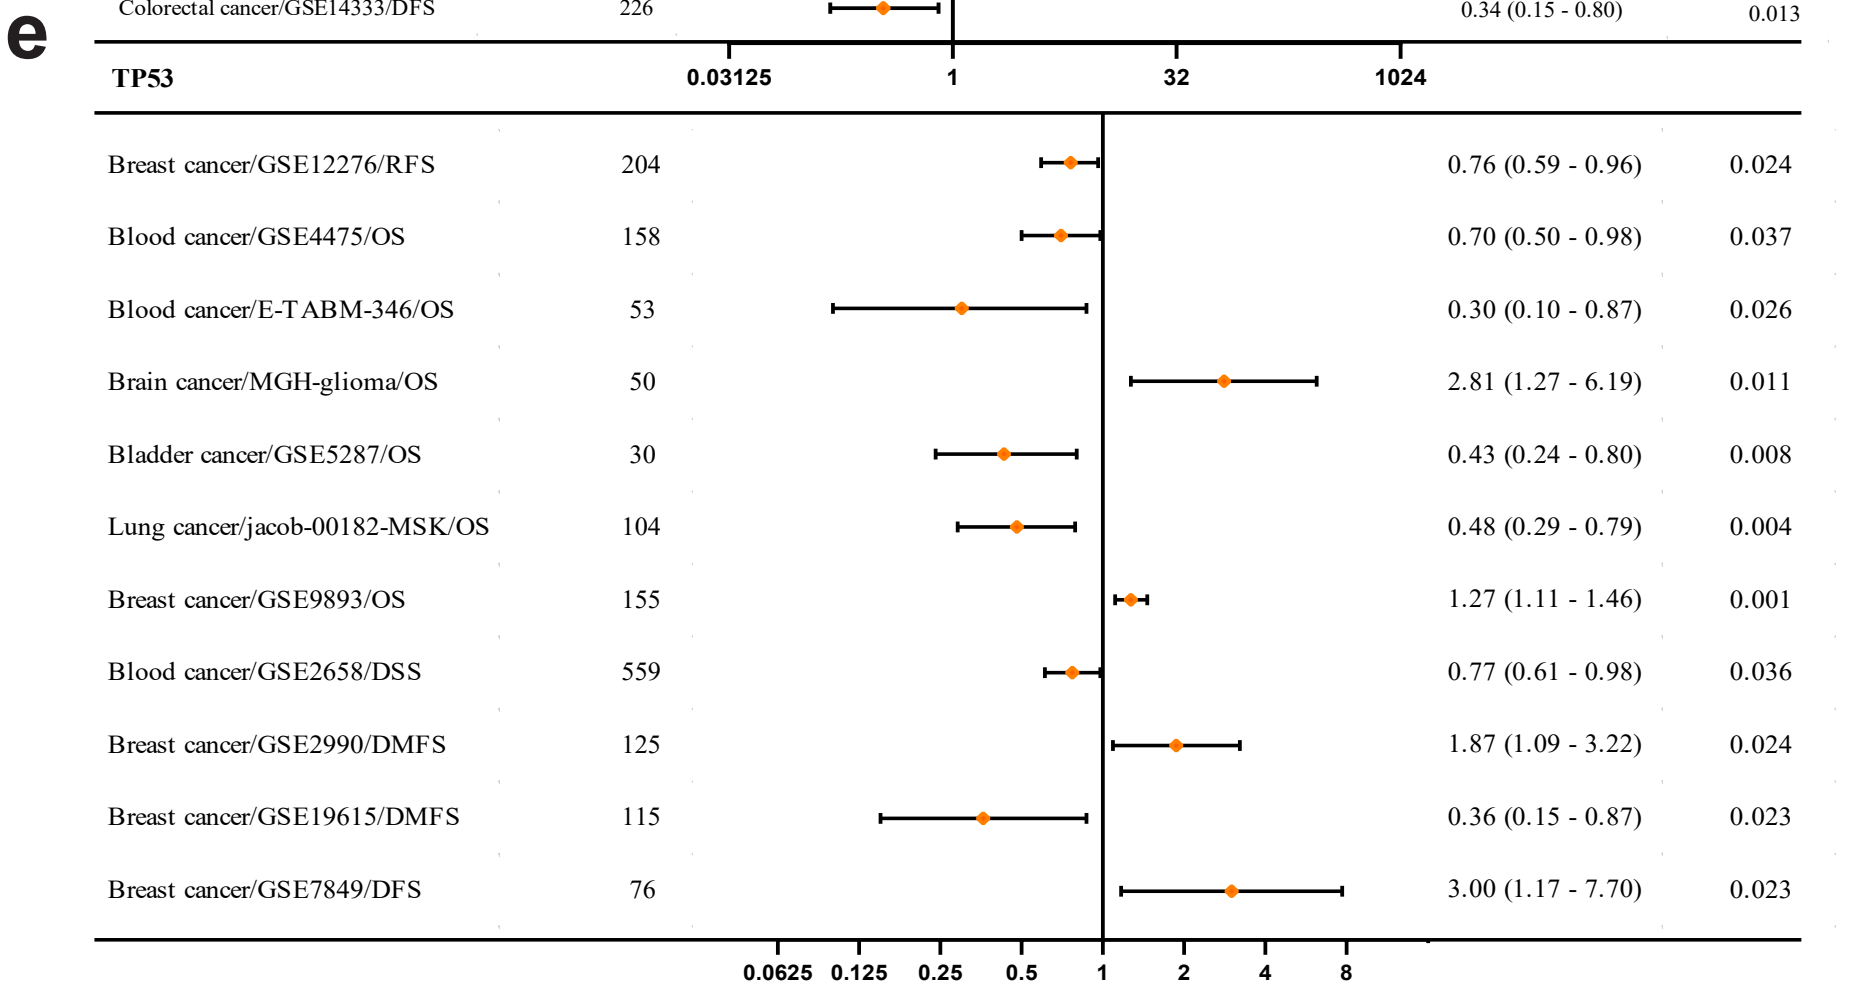

Hazard ratio

Supplement: Supplementary file 6 [file 1]

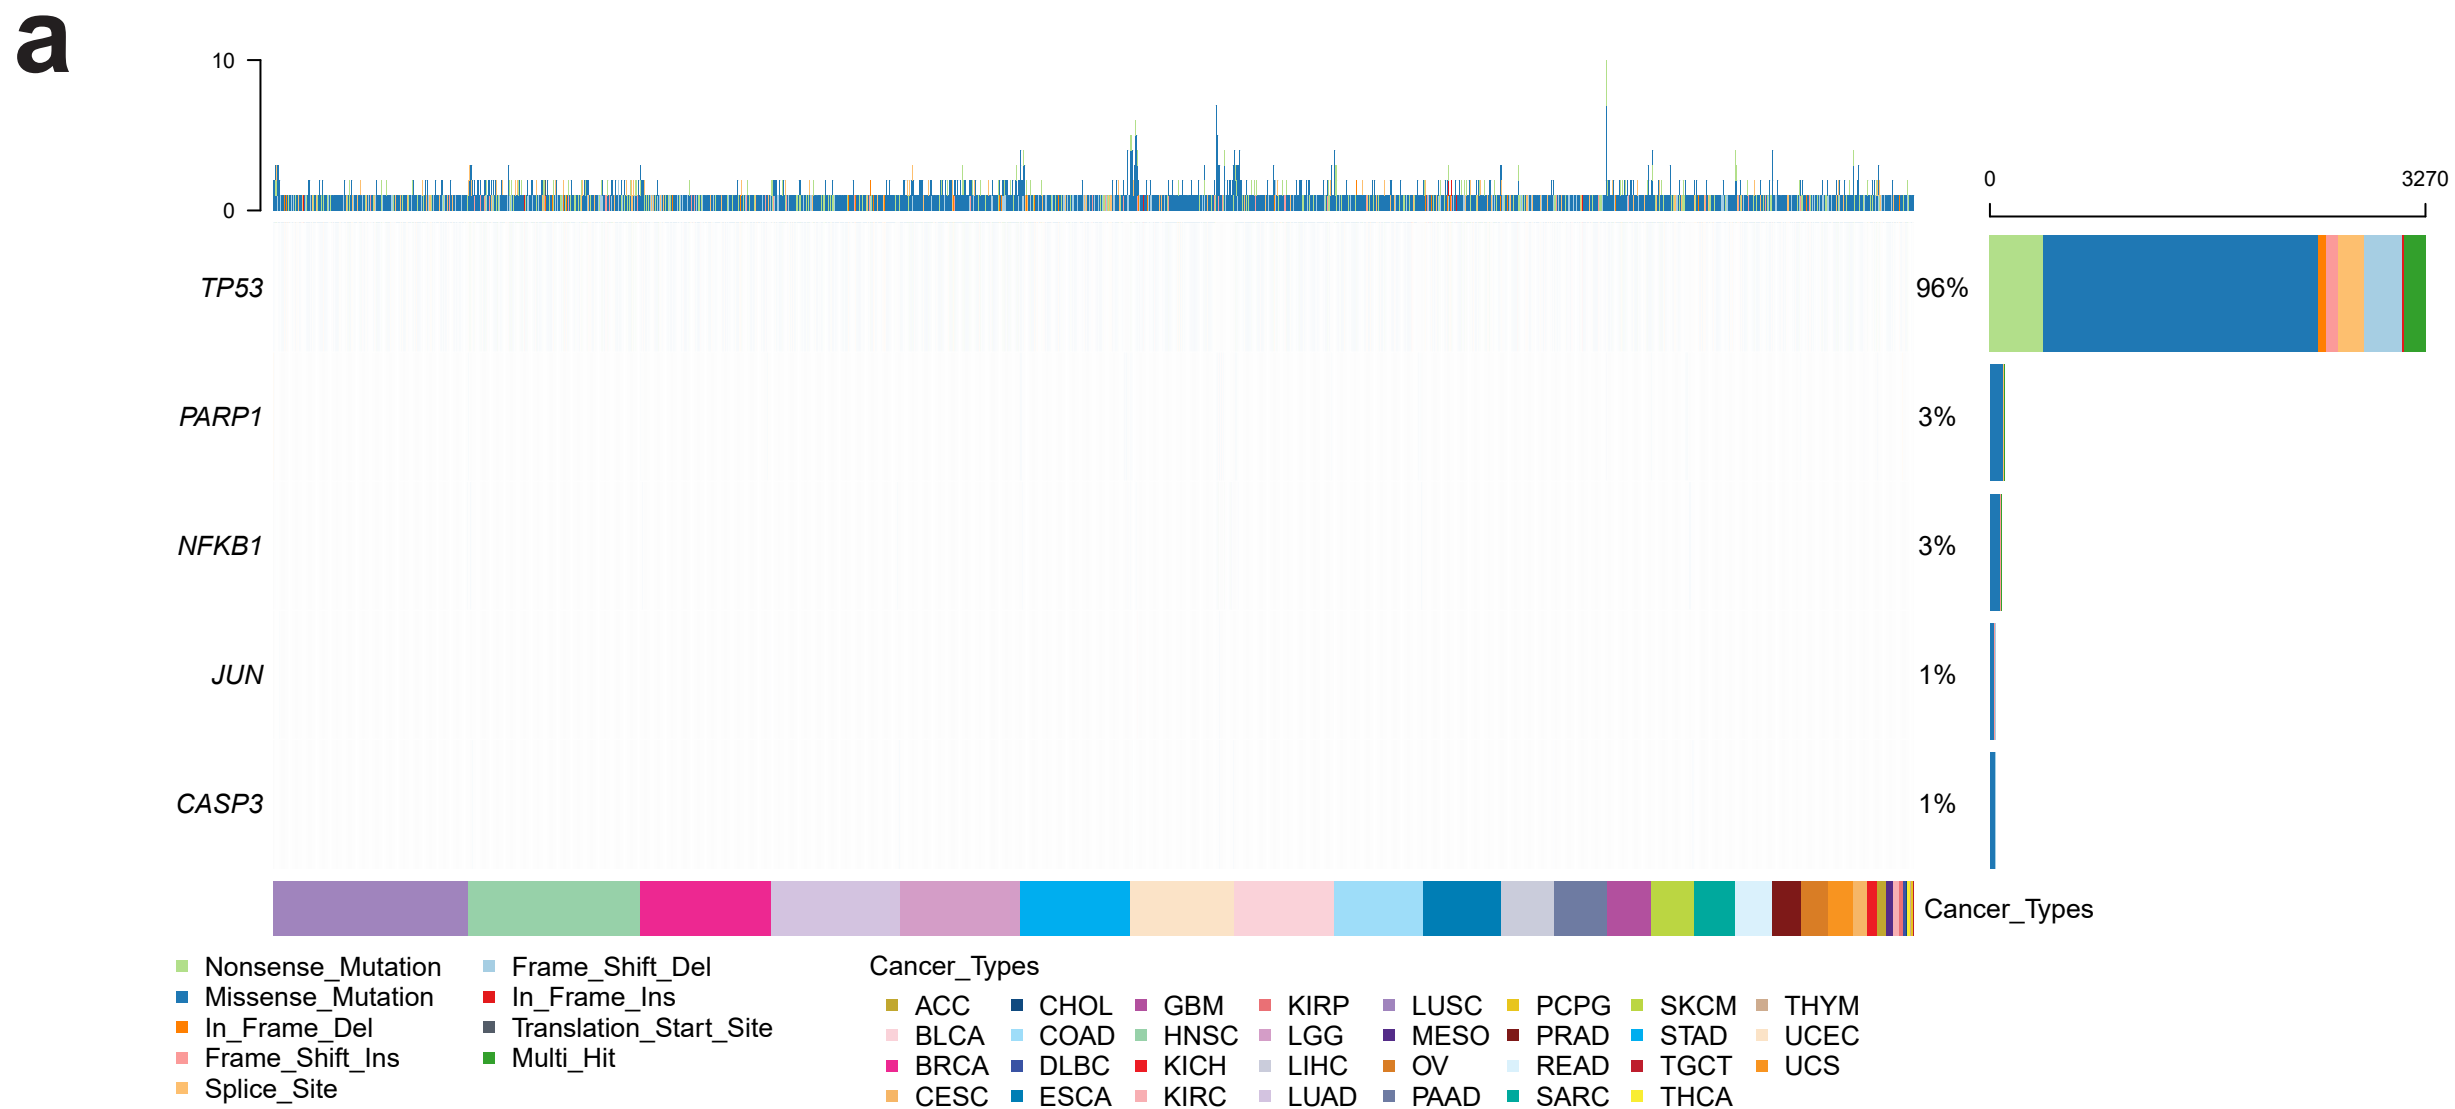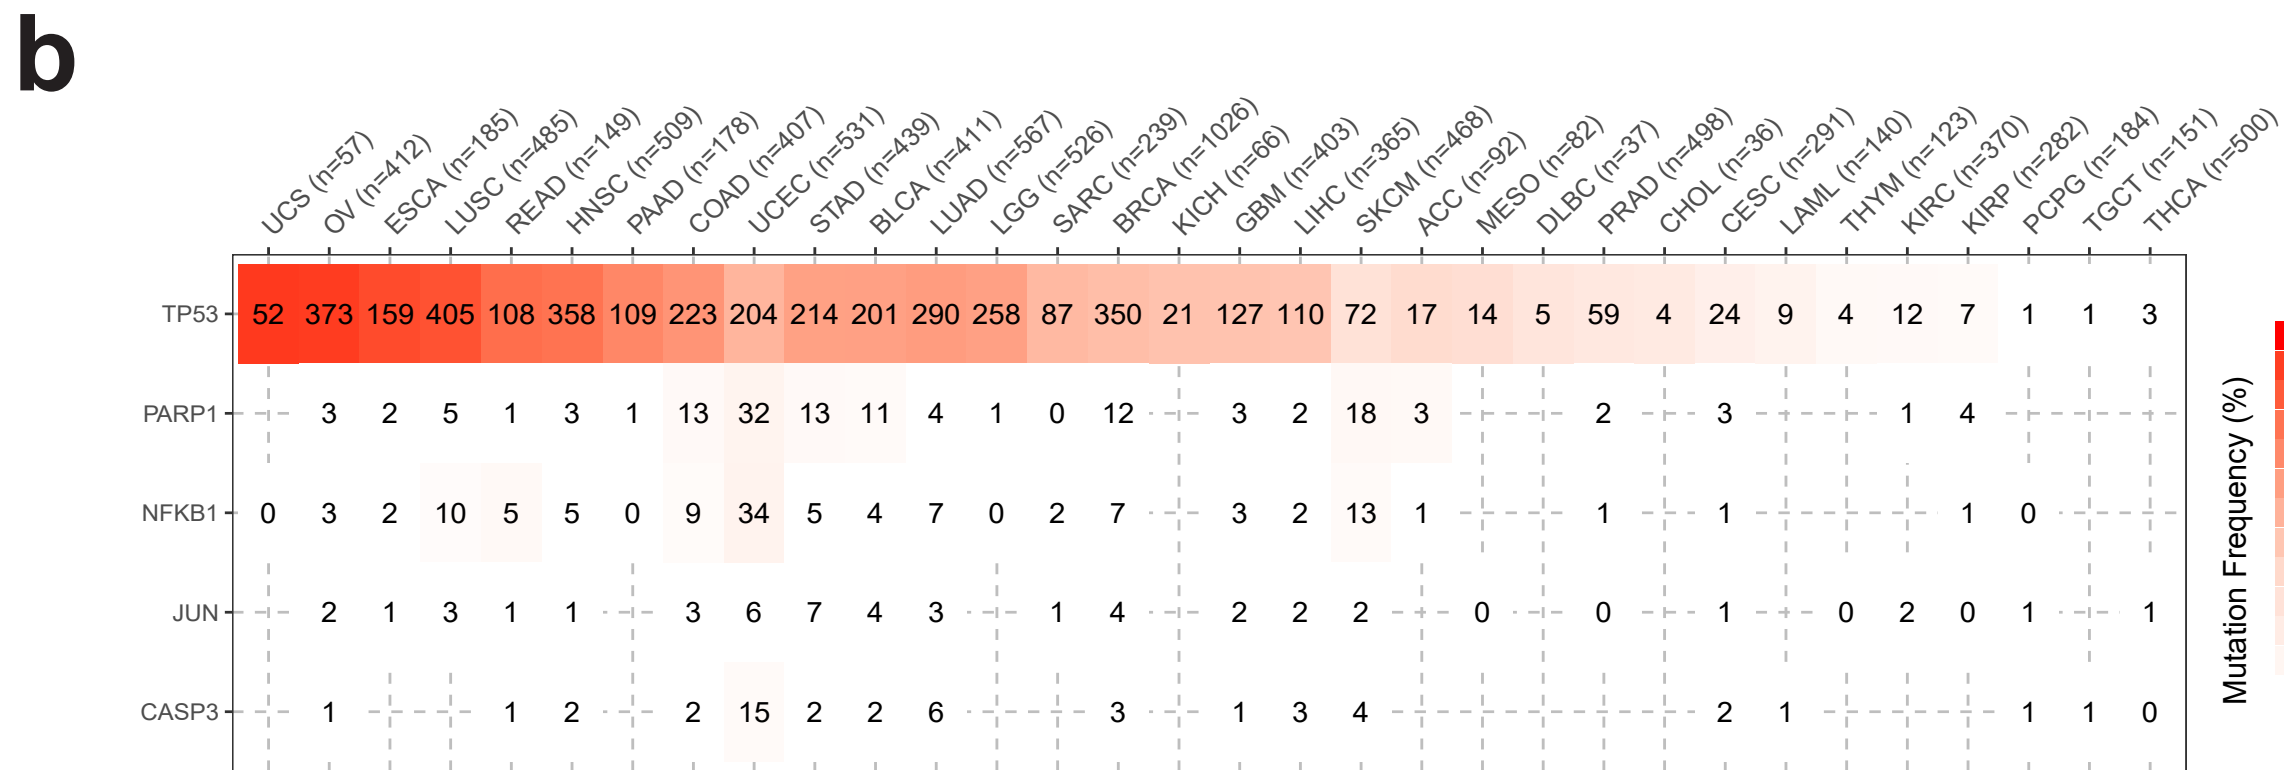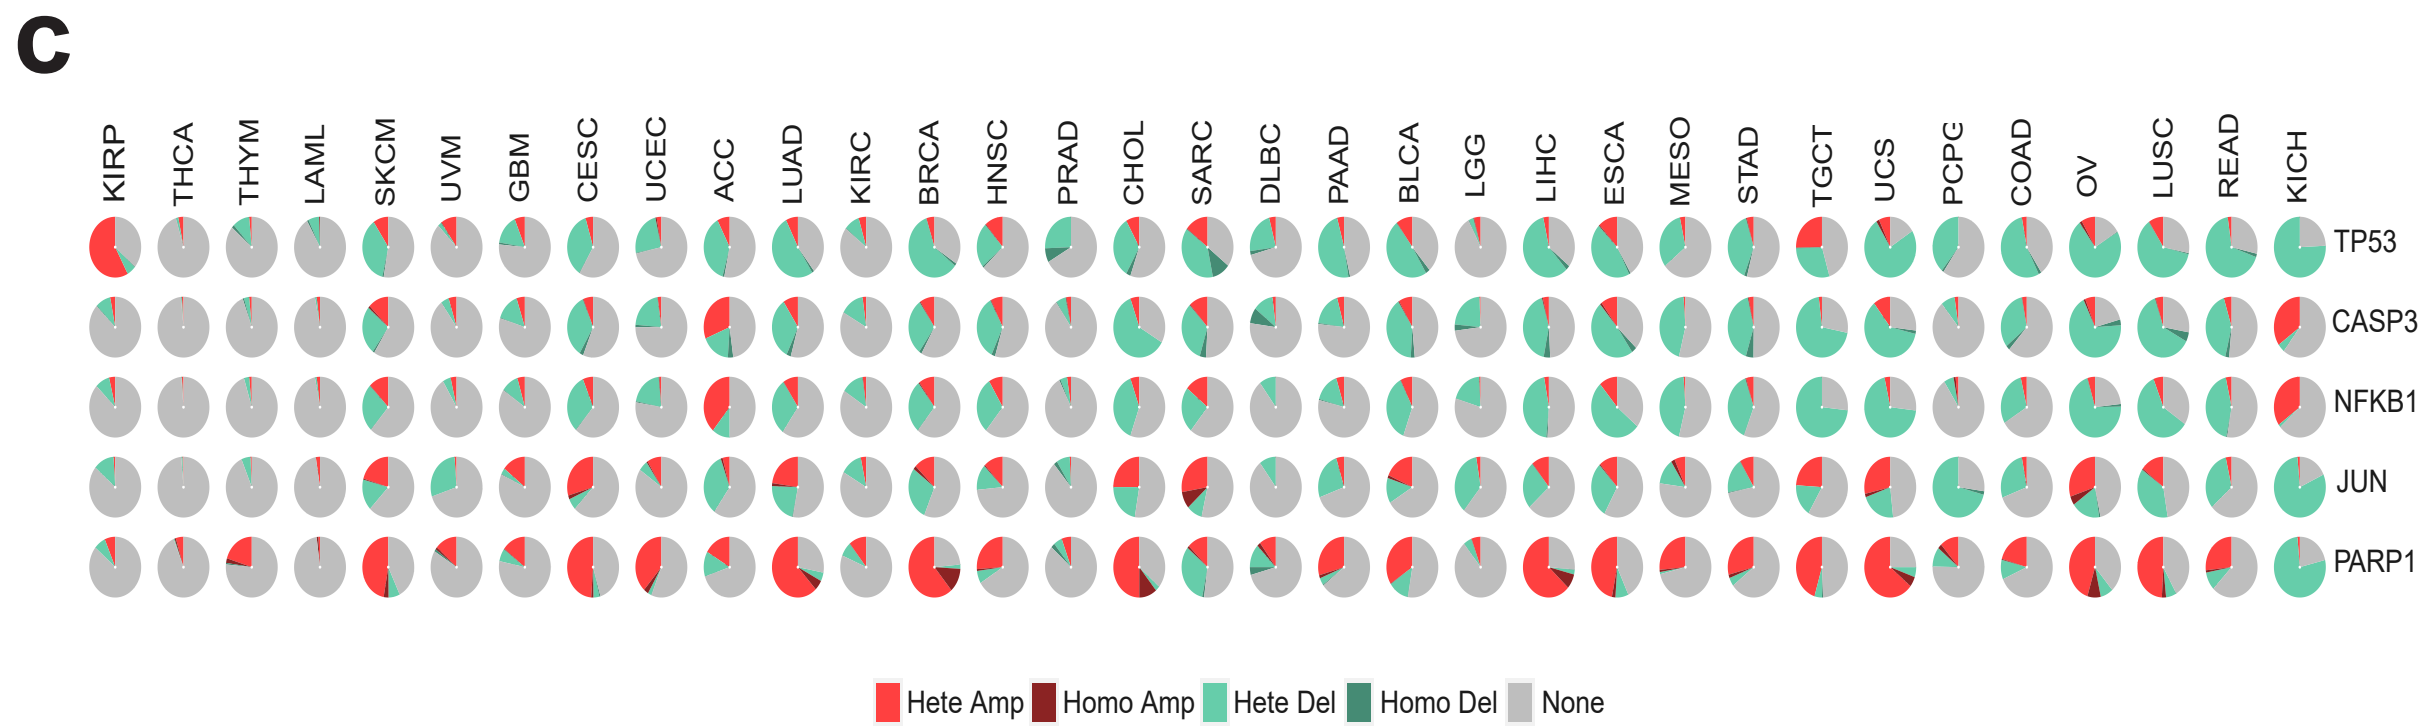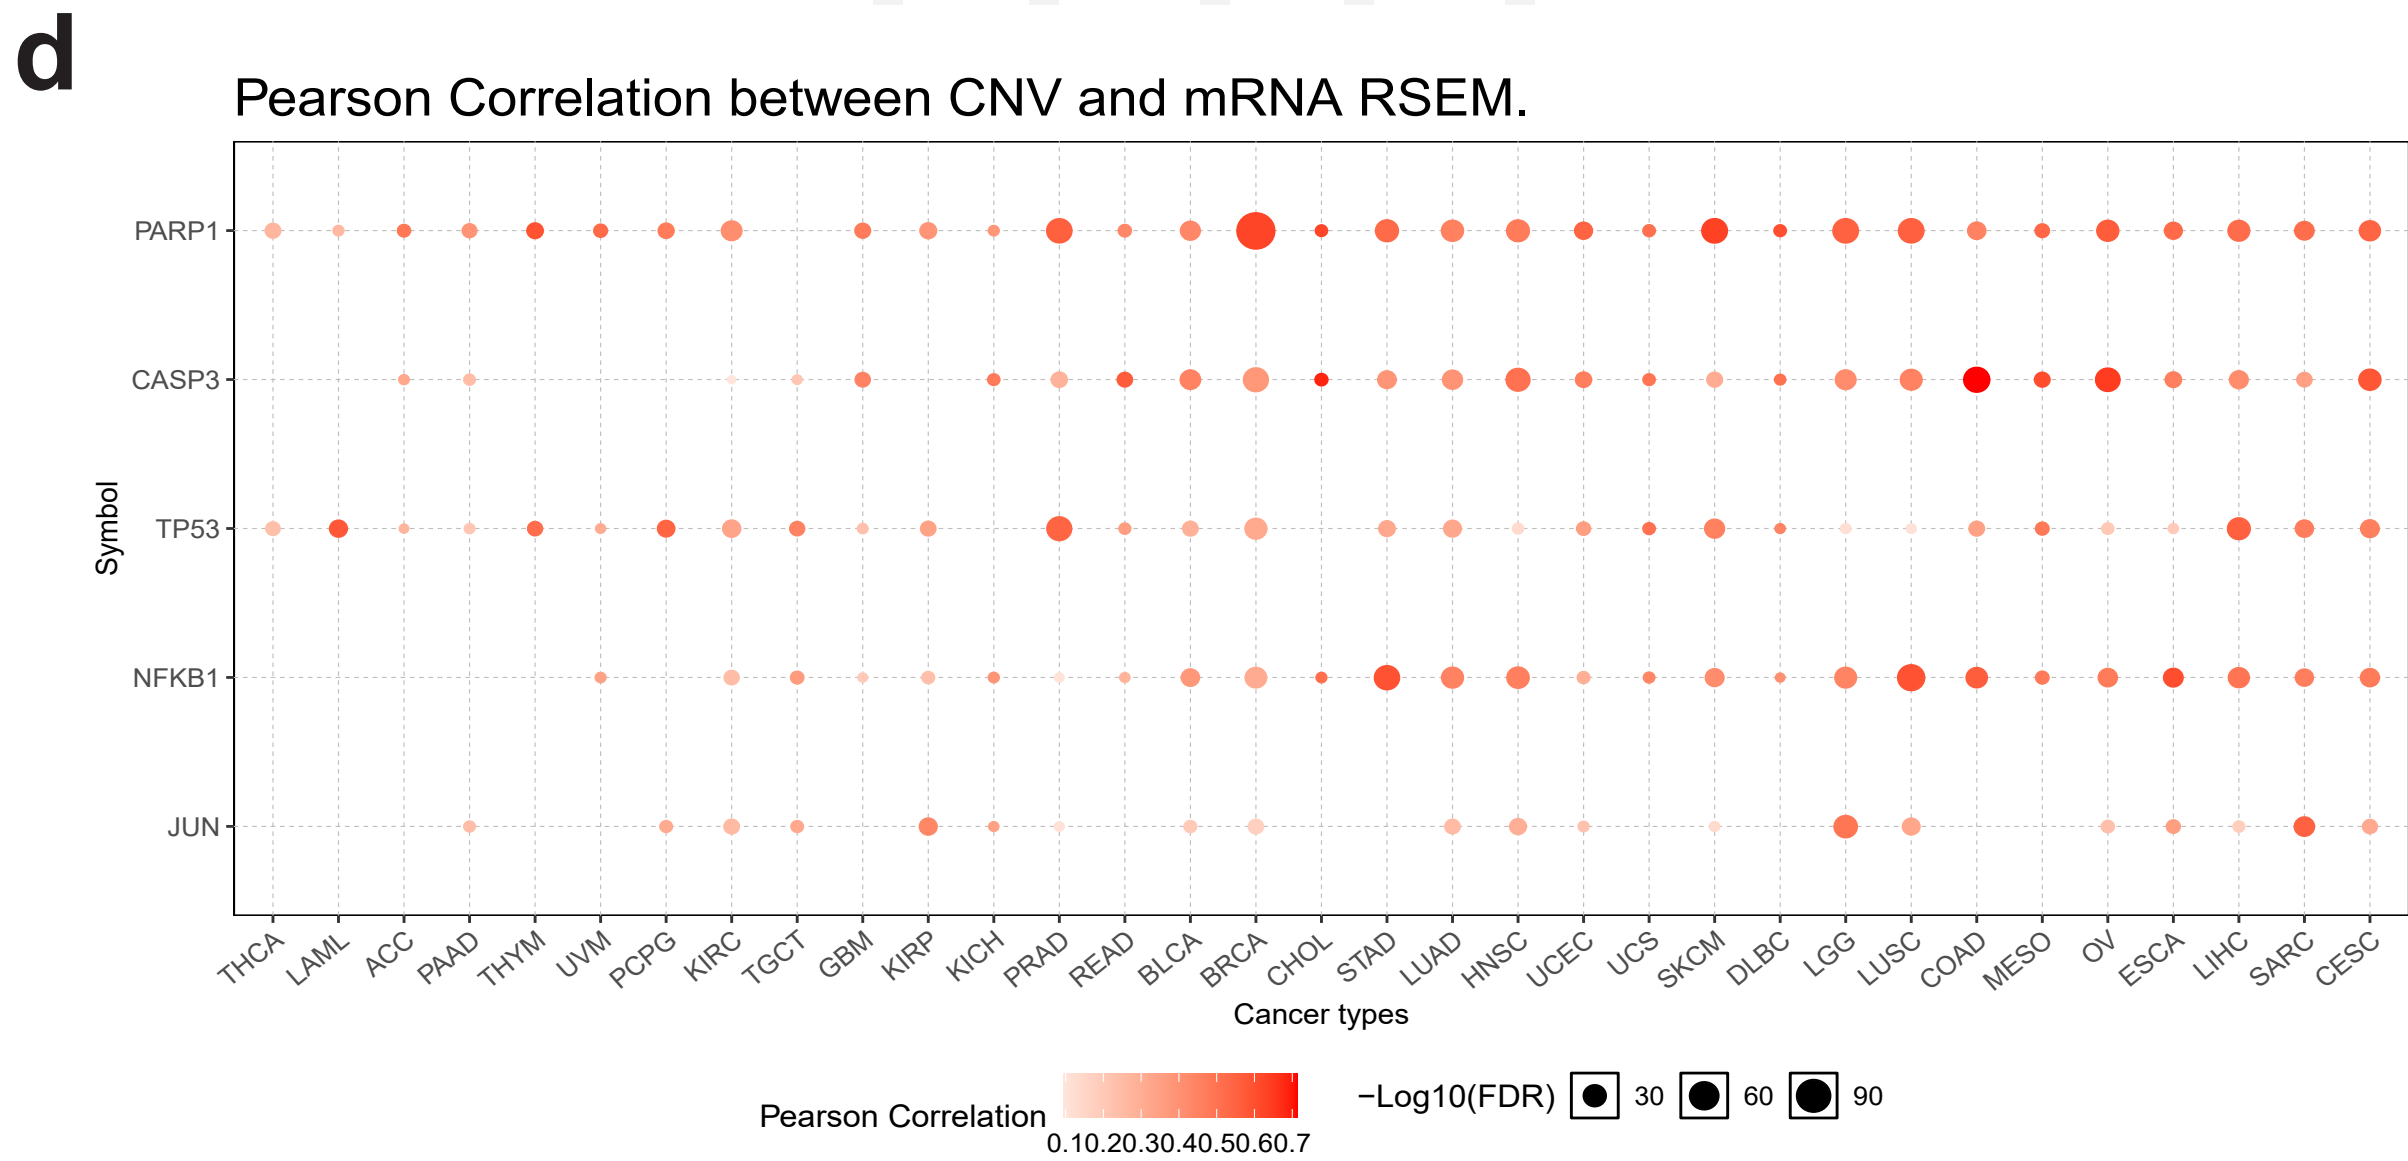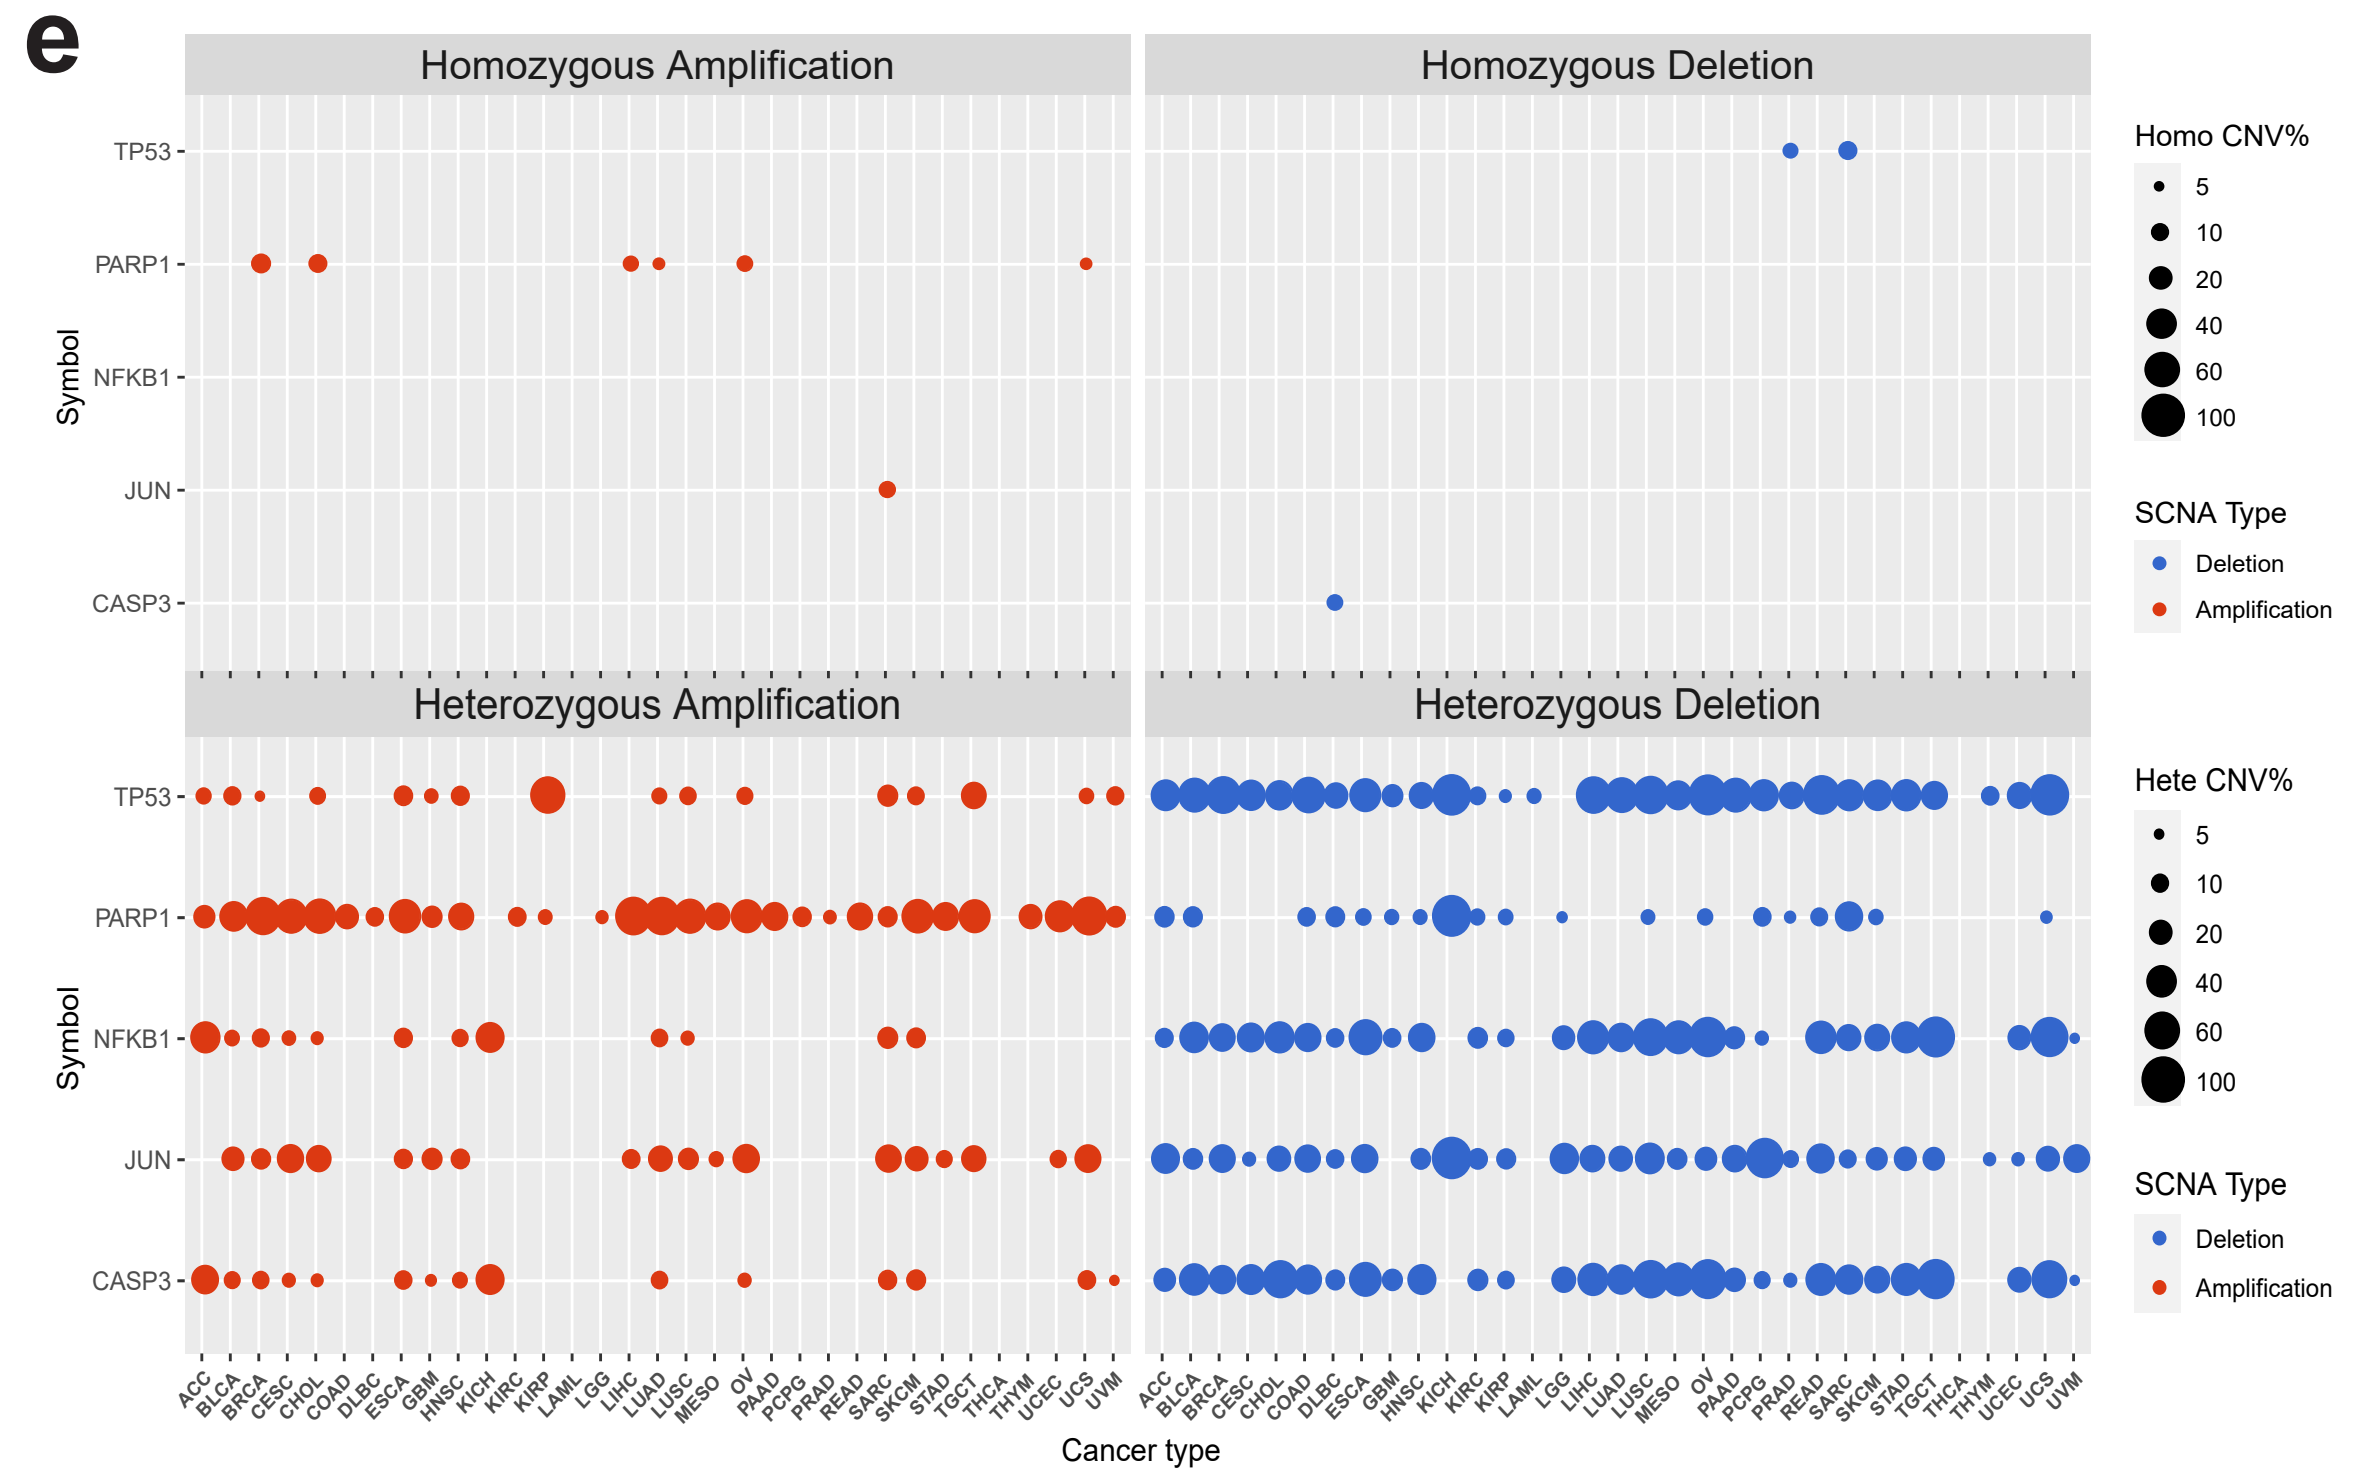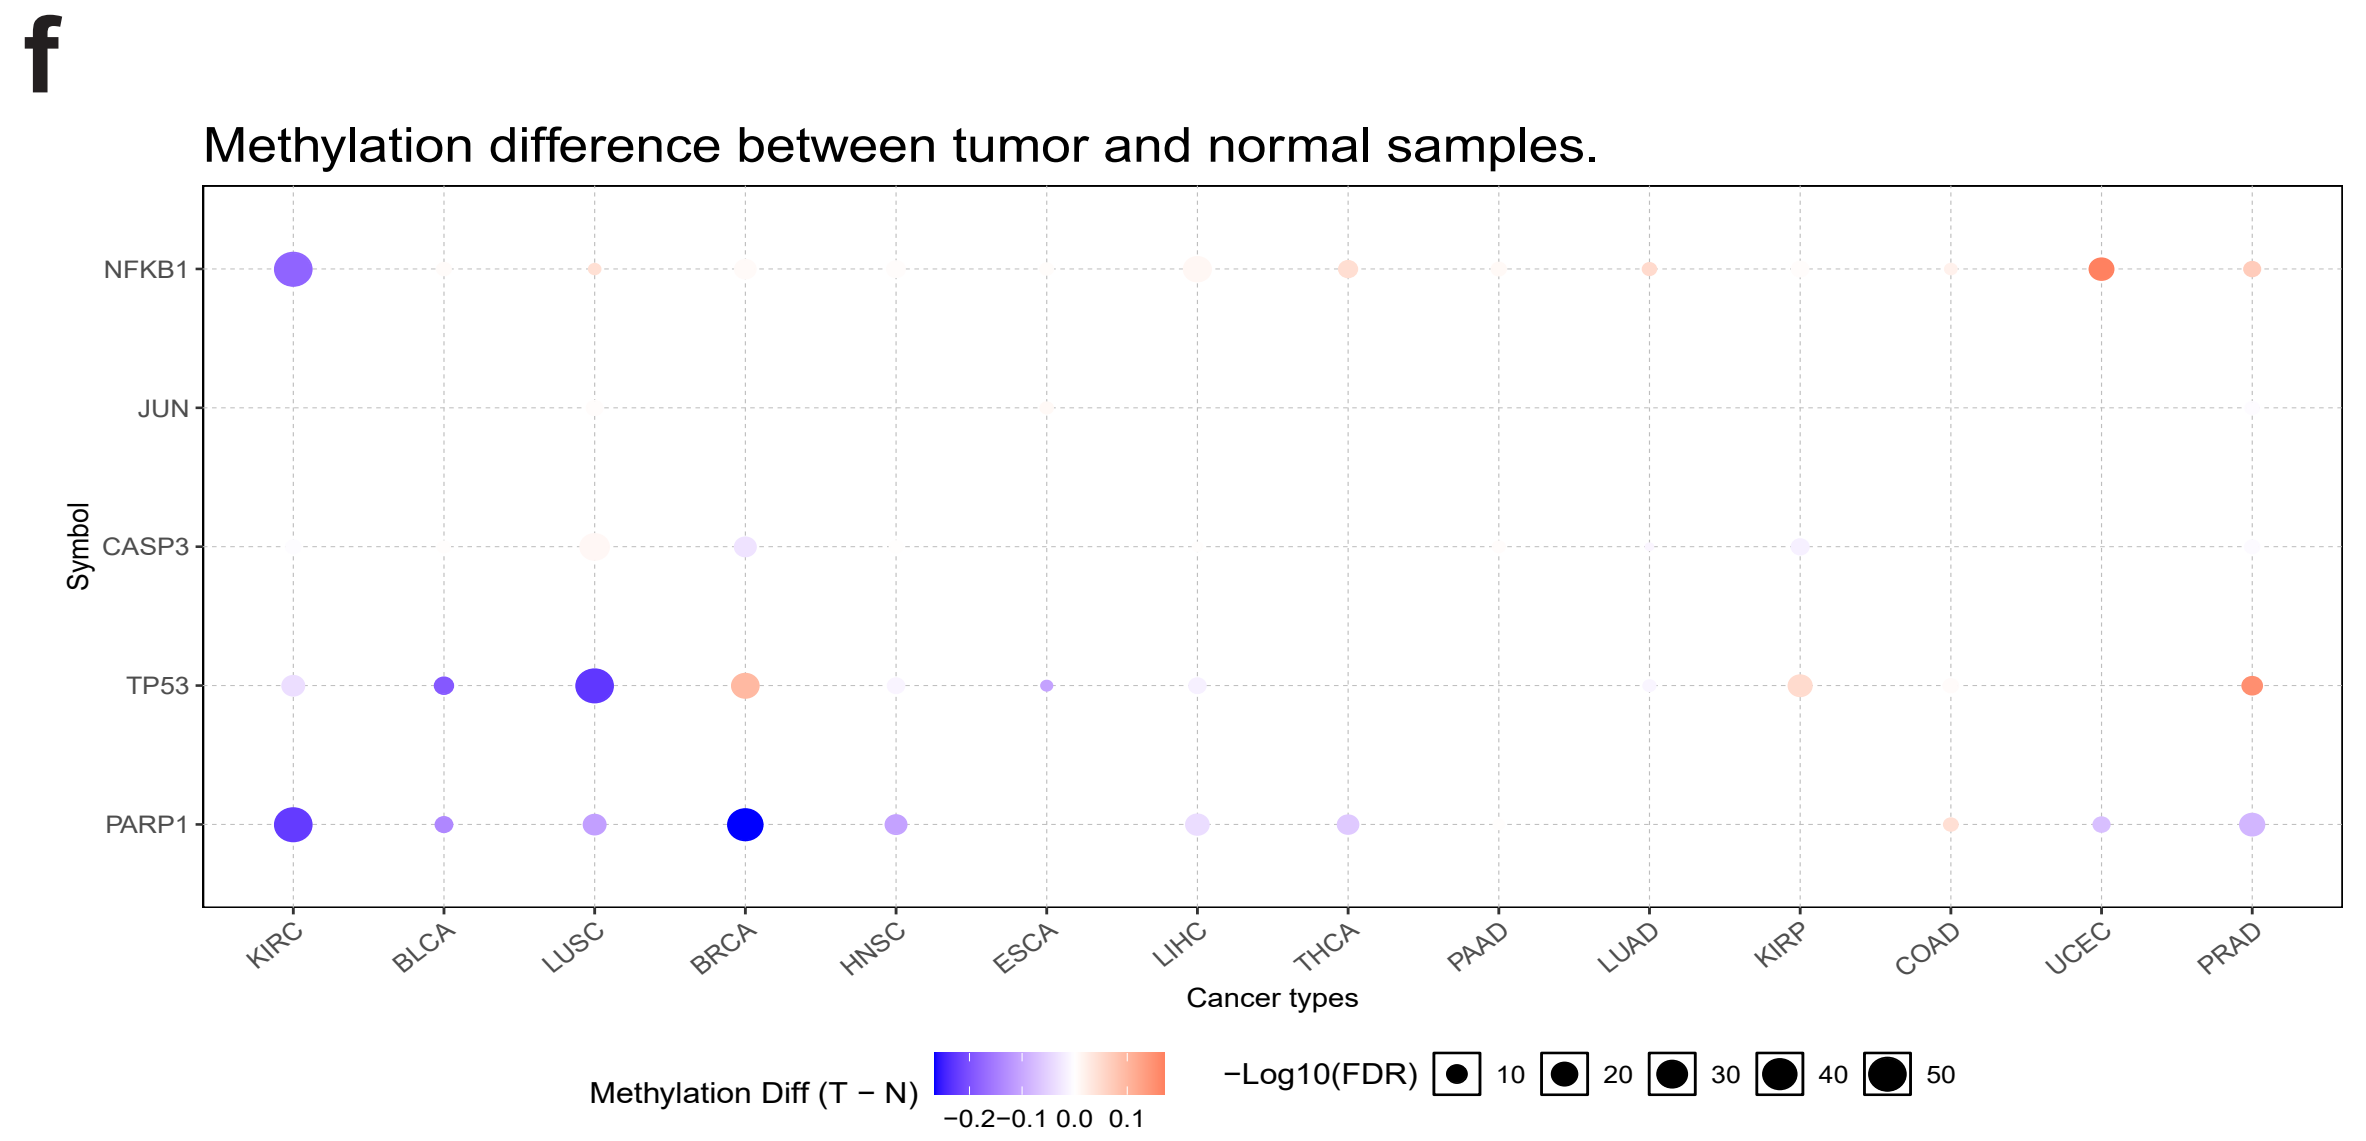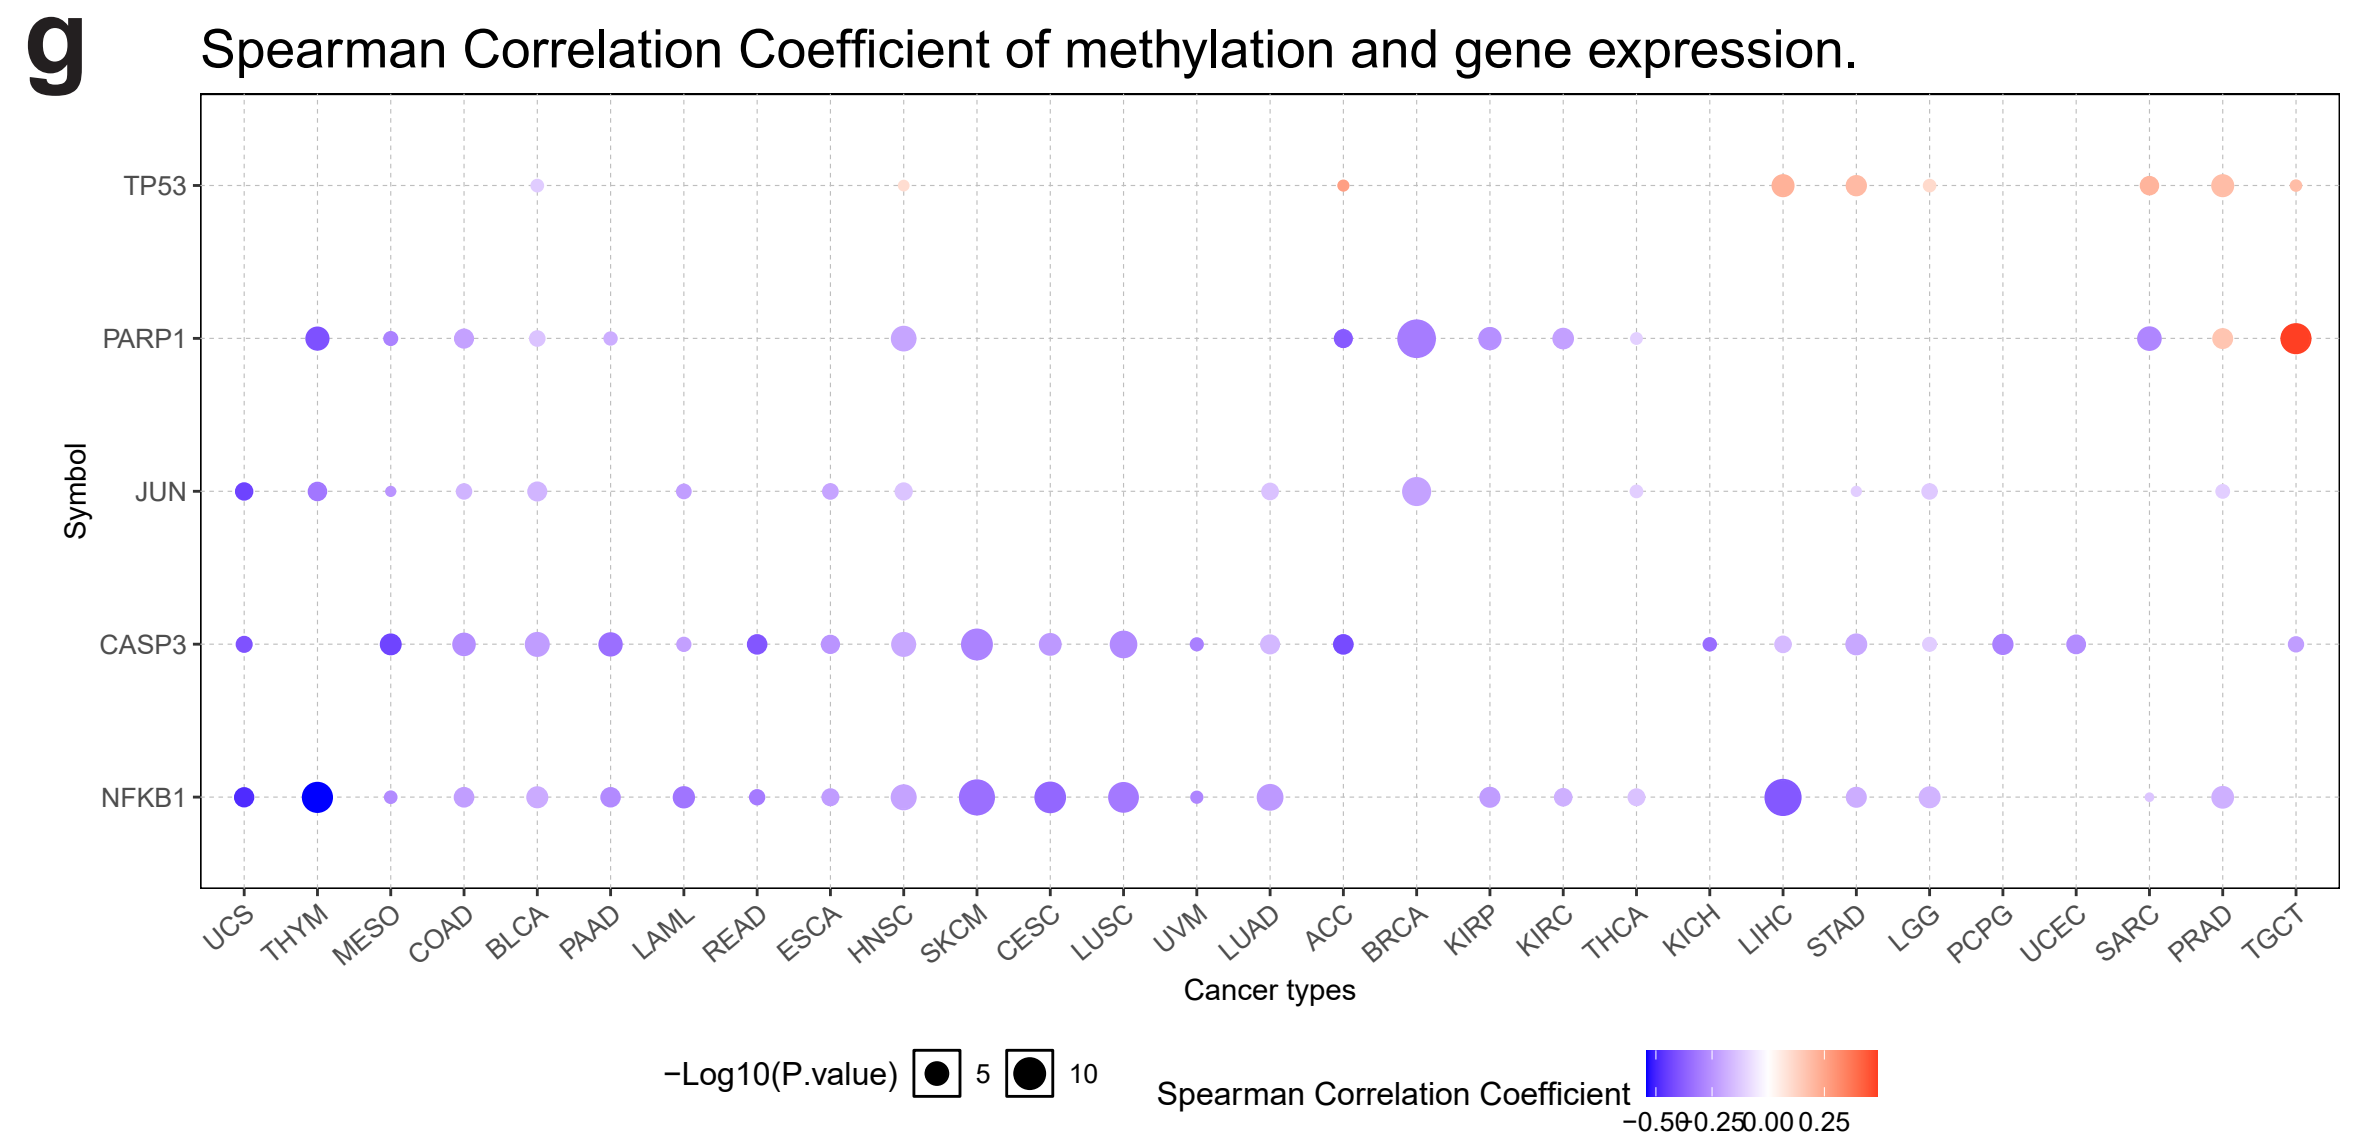

Supplement: Supplementary file 7 [file 1]

**a** NFKB1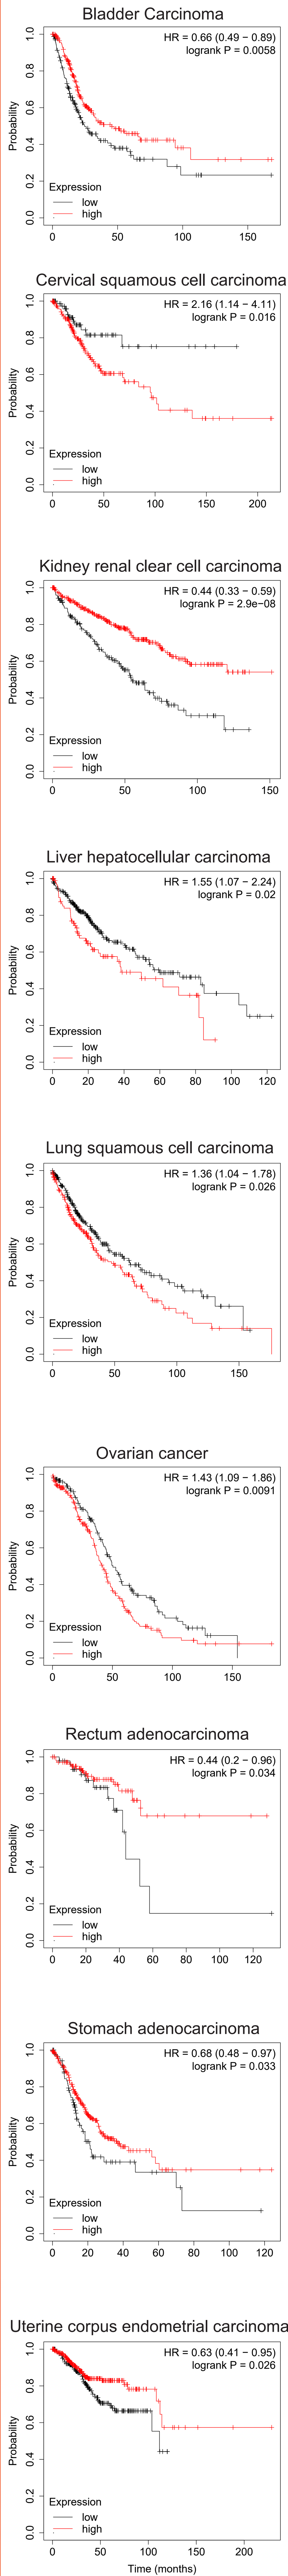**b** CASP3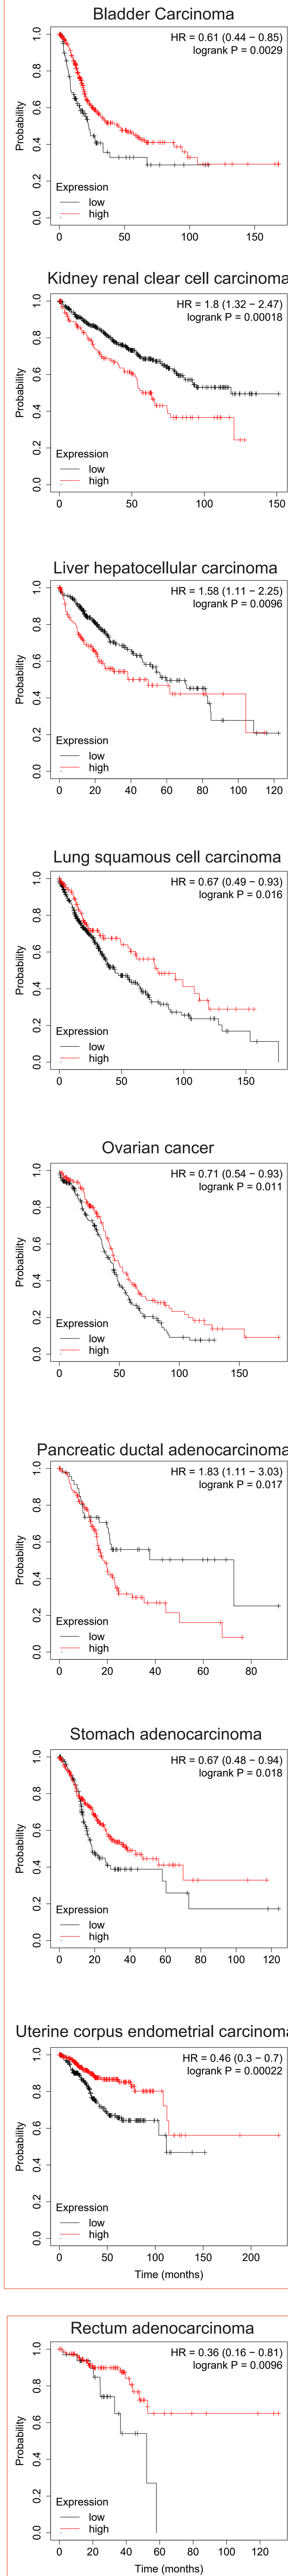**c** JUN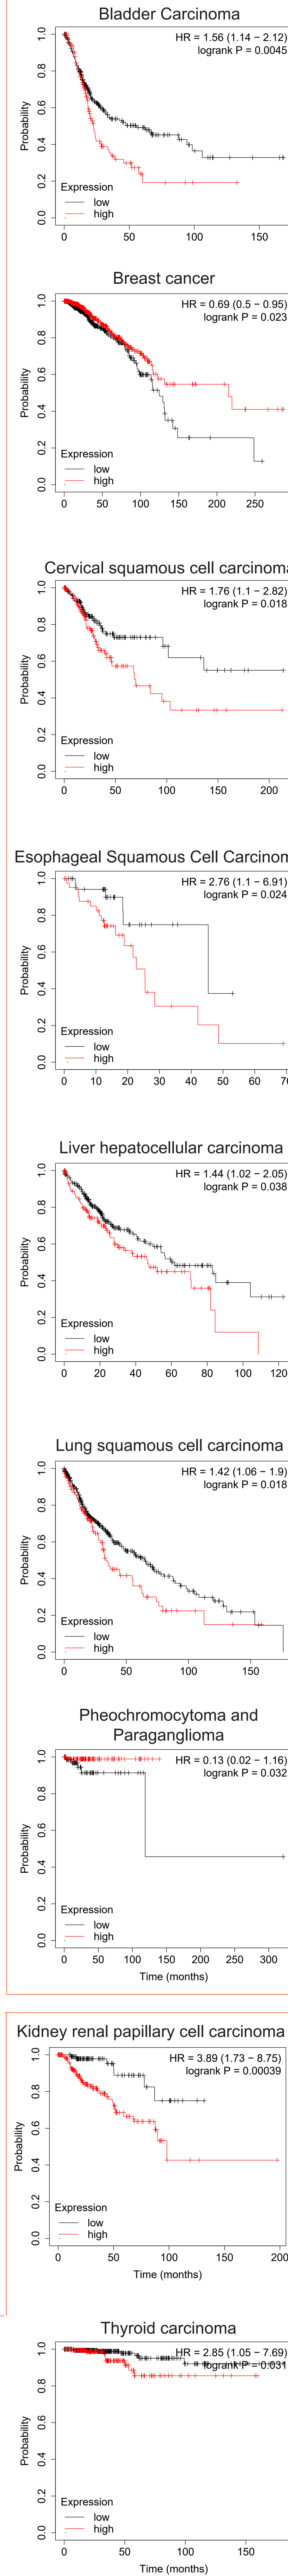**d** TP53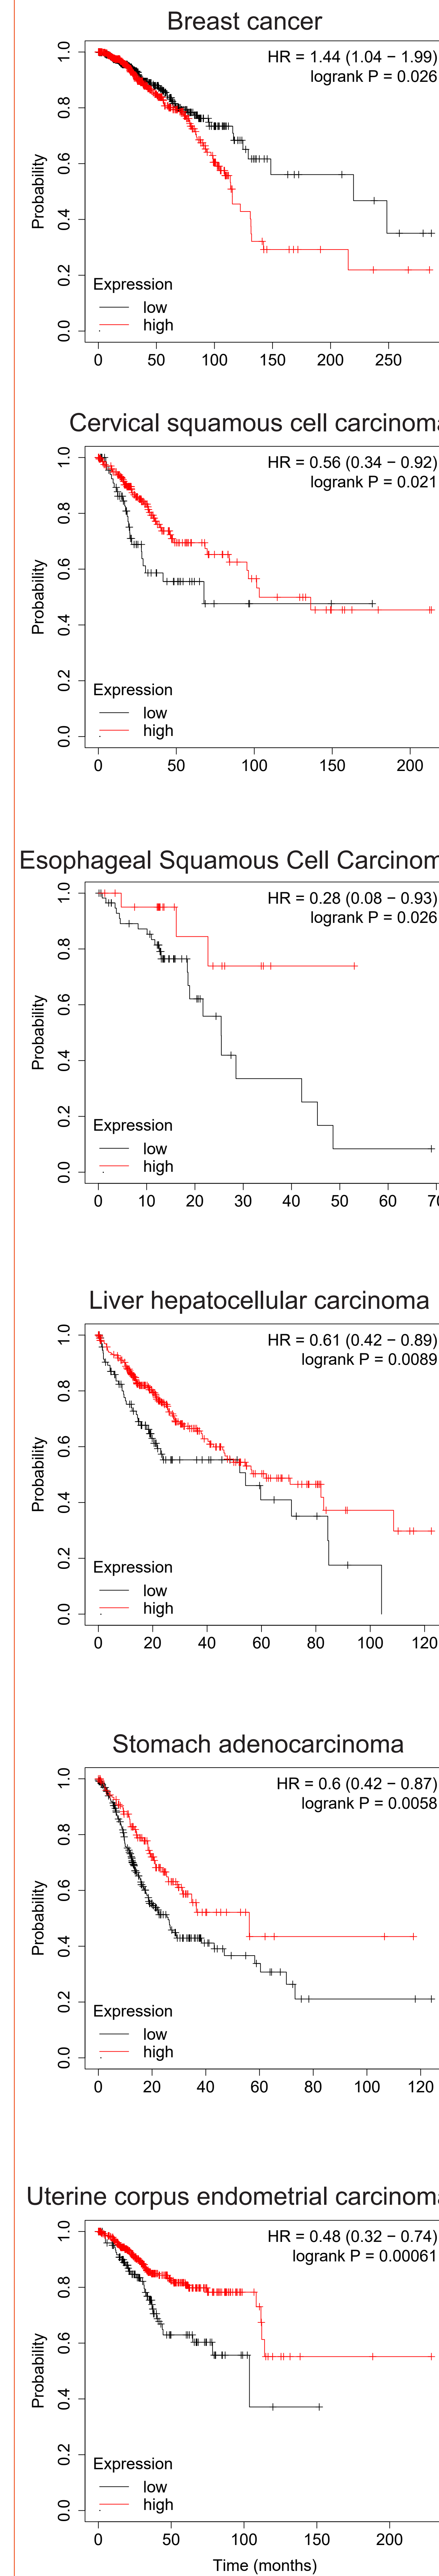**e** PARP1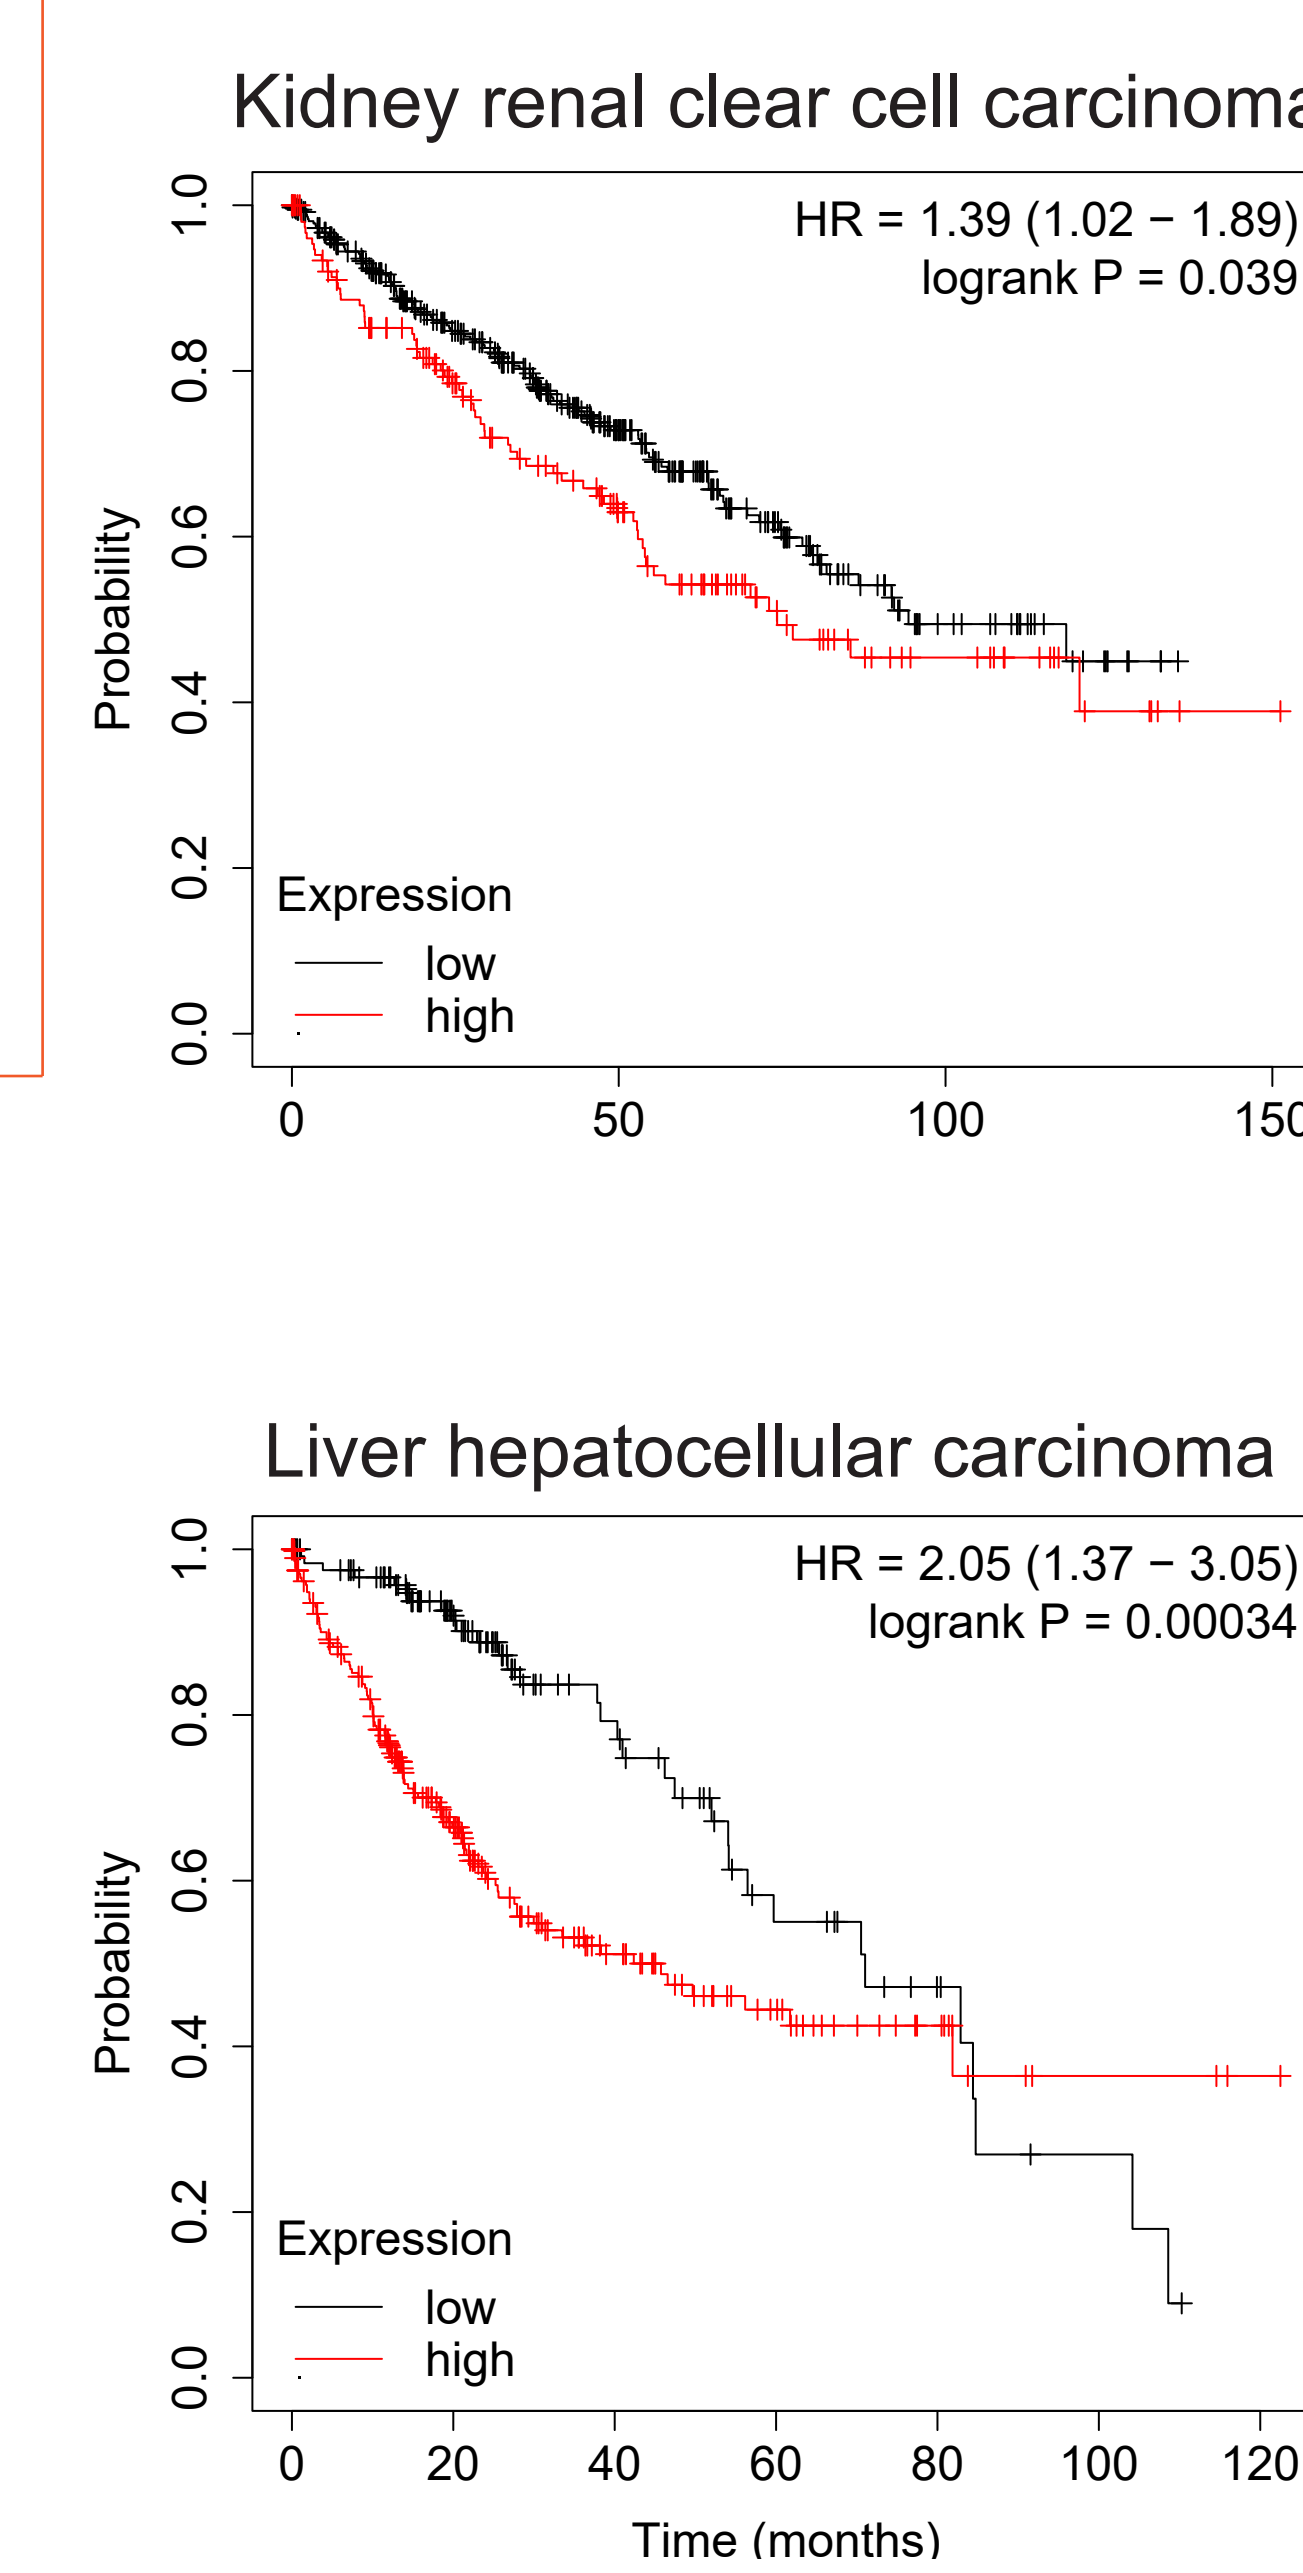

Supplement: Supplementary file 8 [file 1]

**a****Brain Lower Grade Glioma**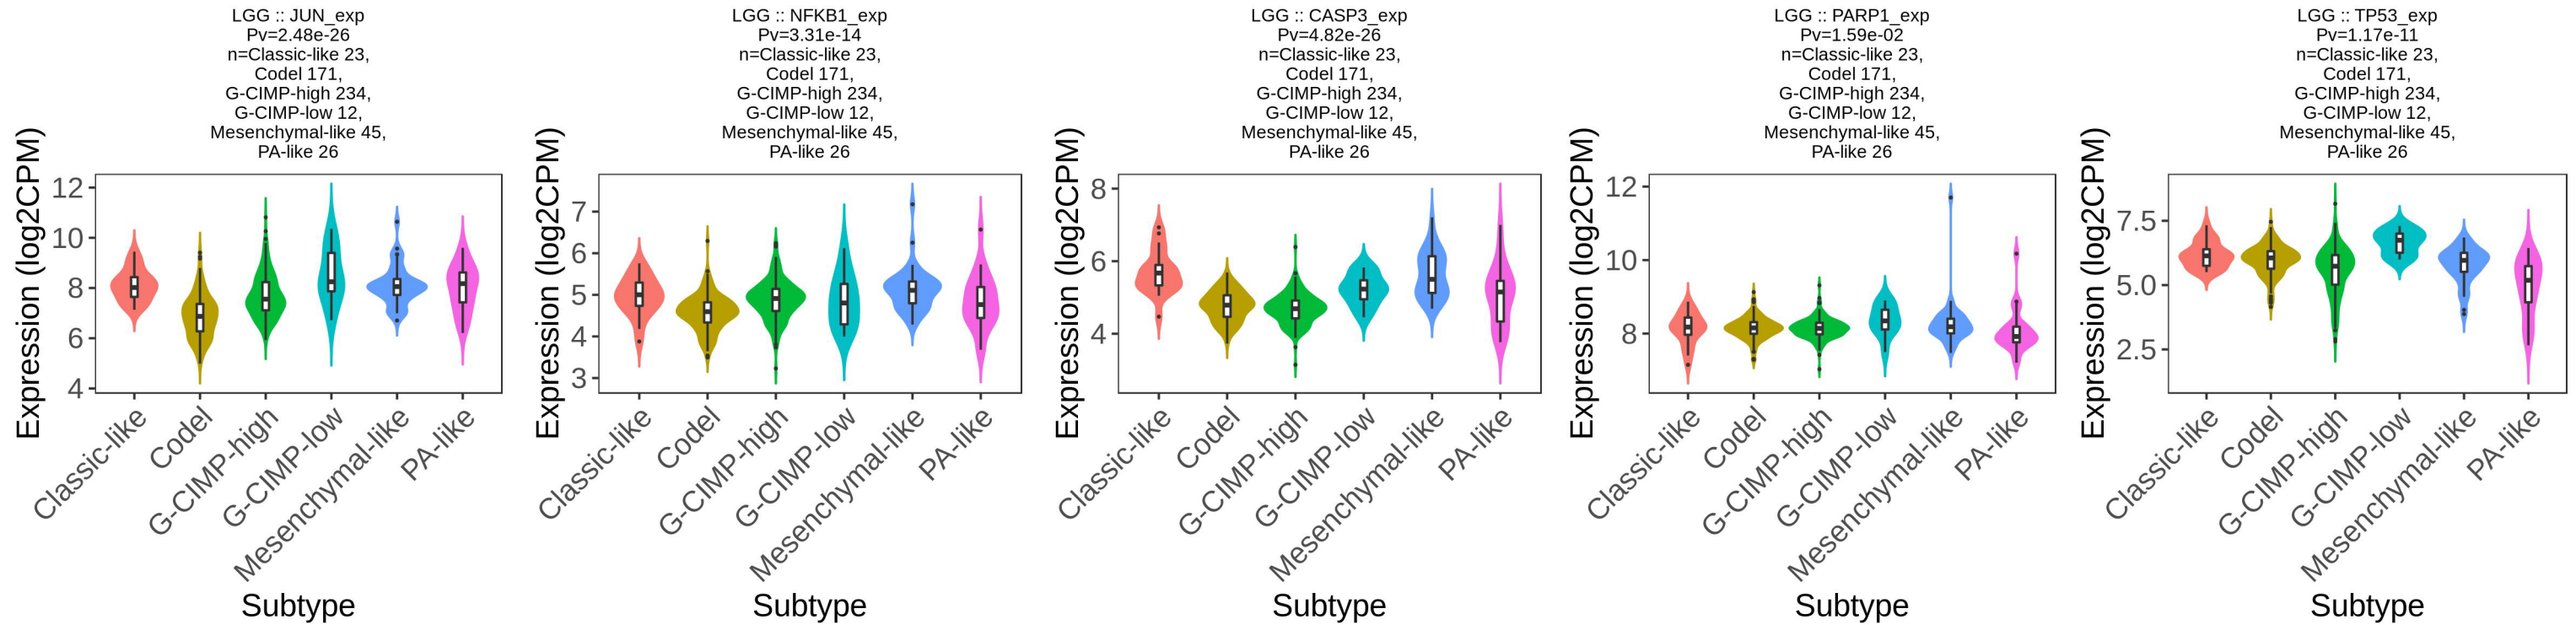**b****Adrenocortical carcinoma**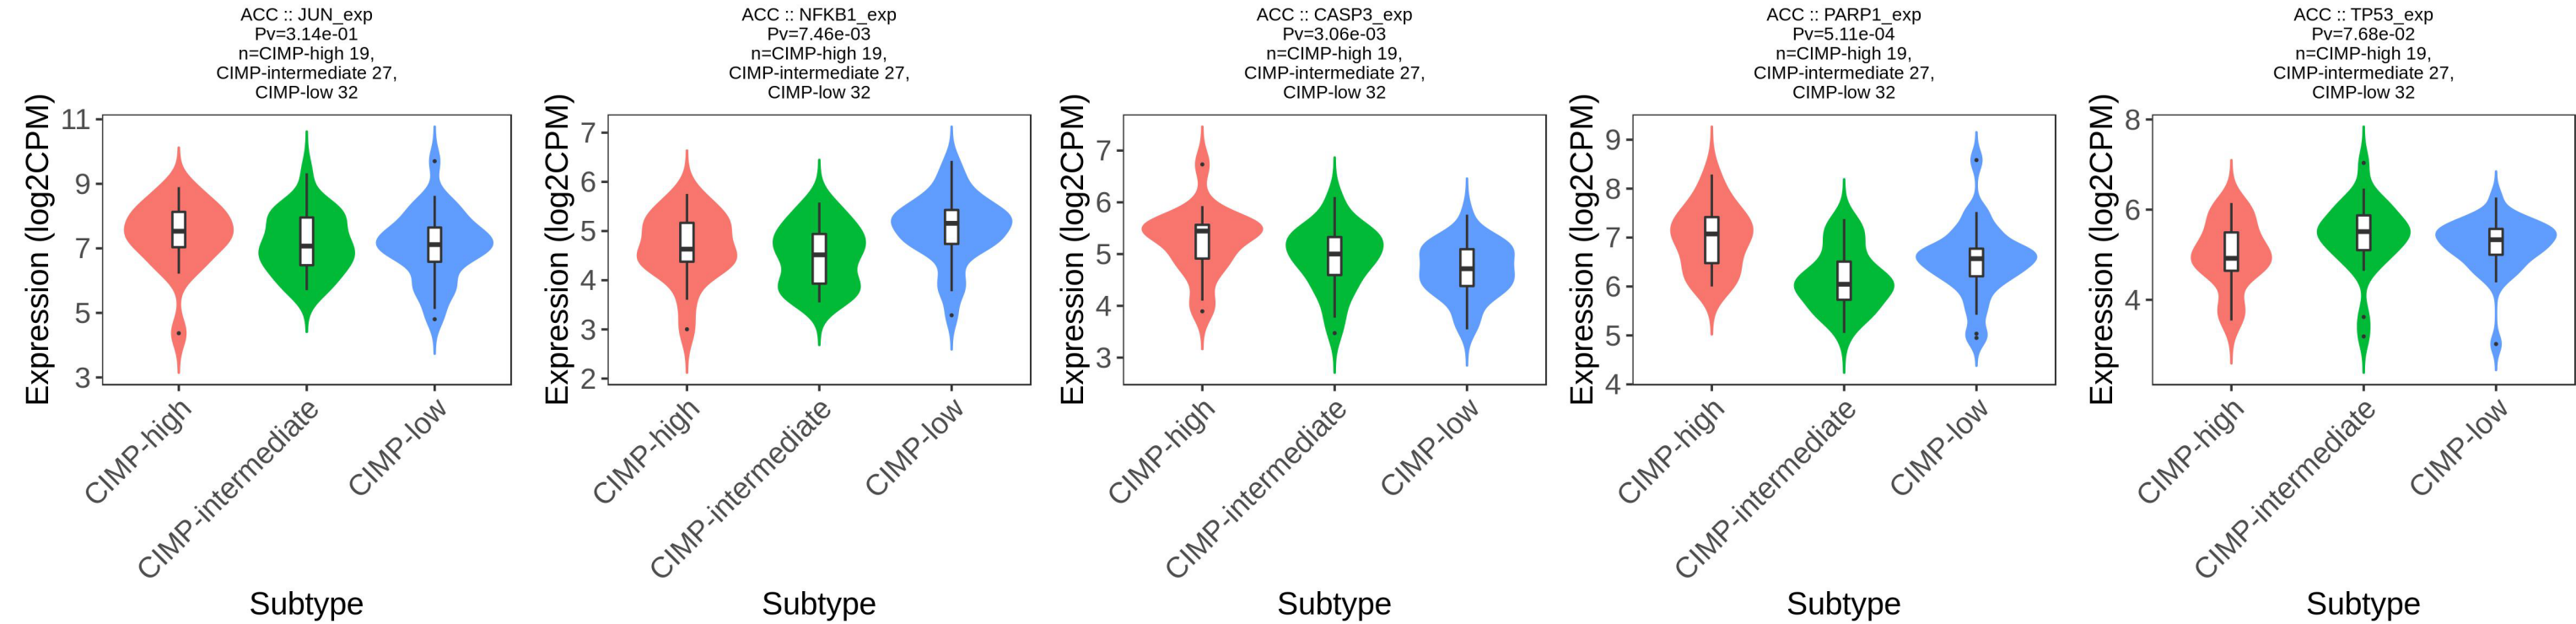

Supplement: Supplementary file 9 [file 1]

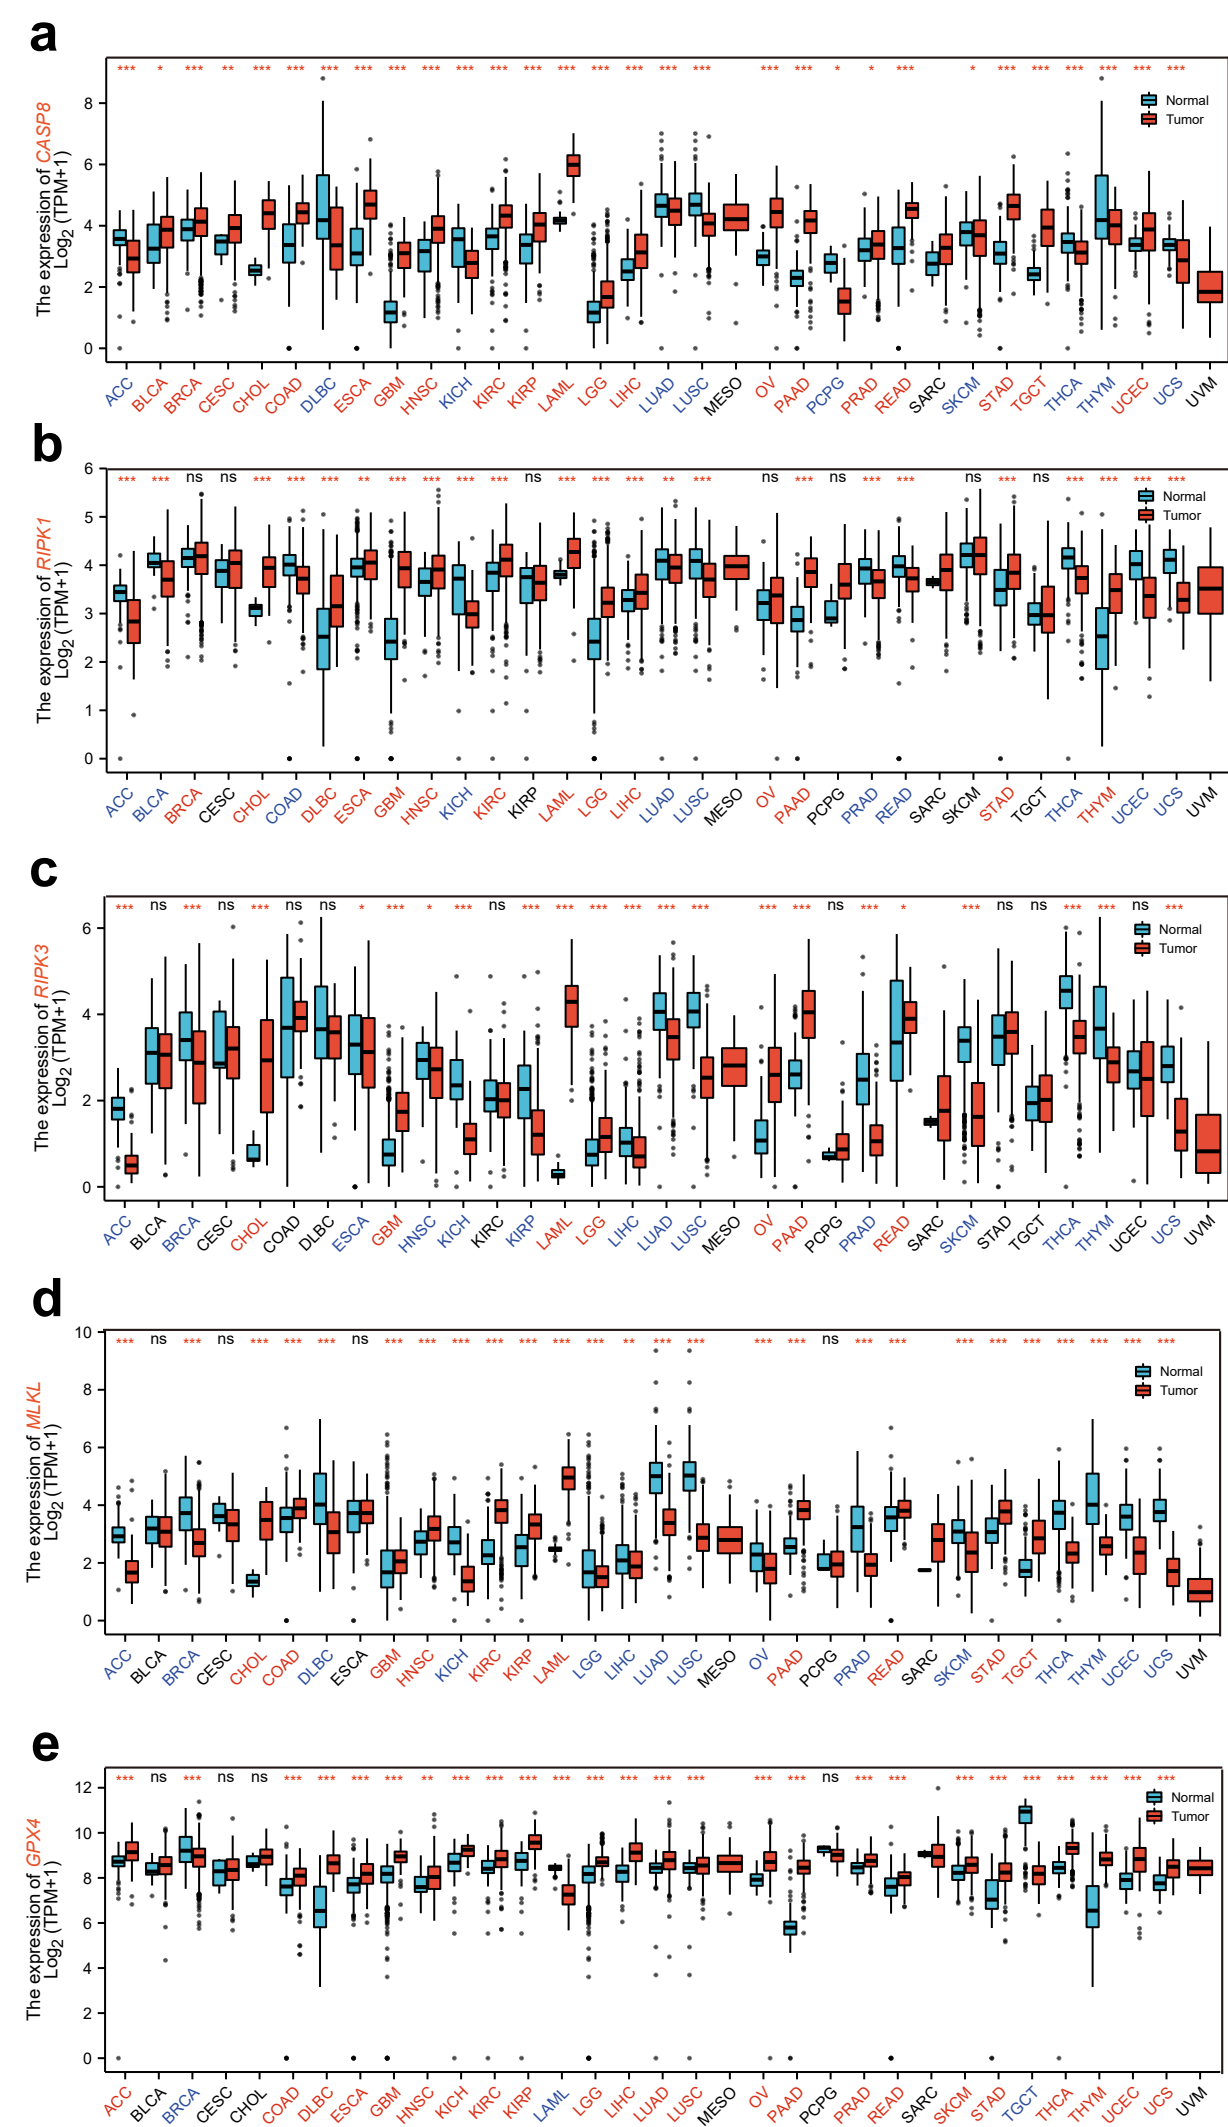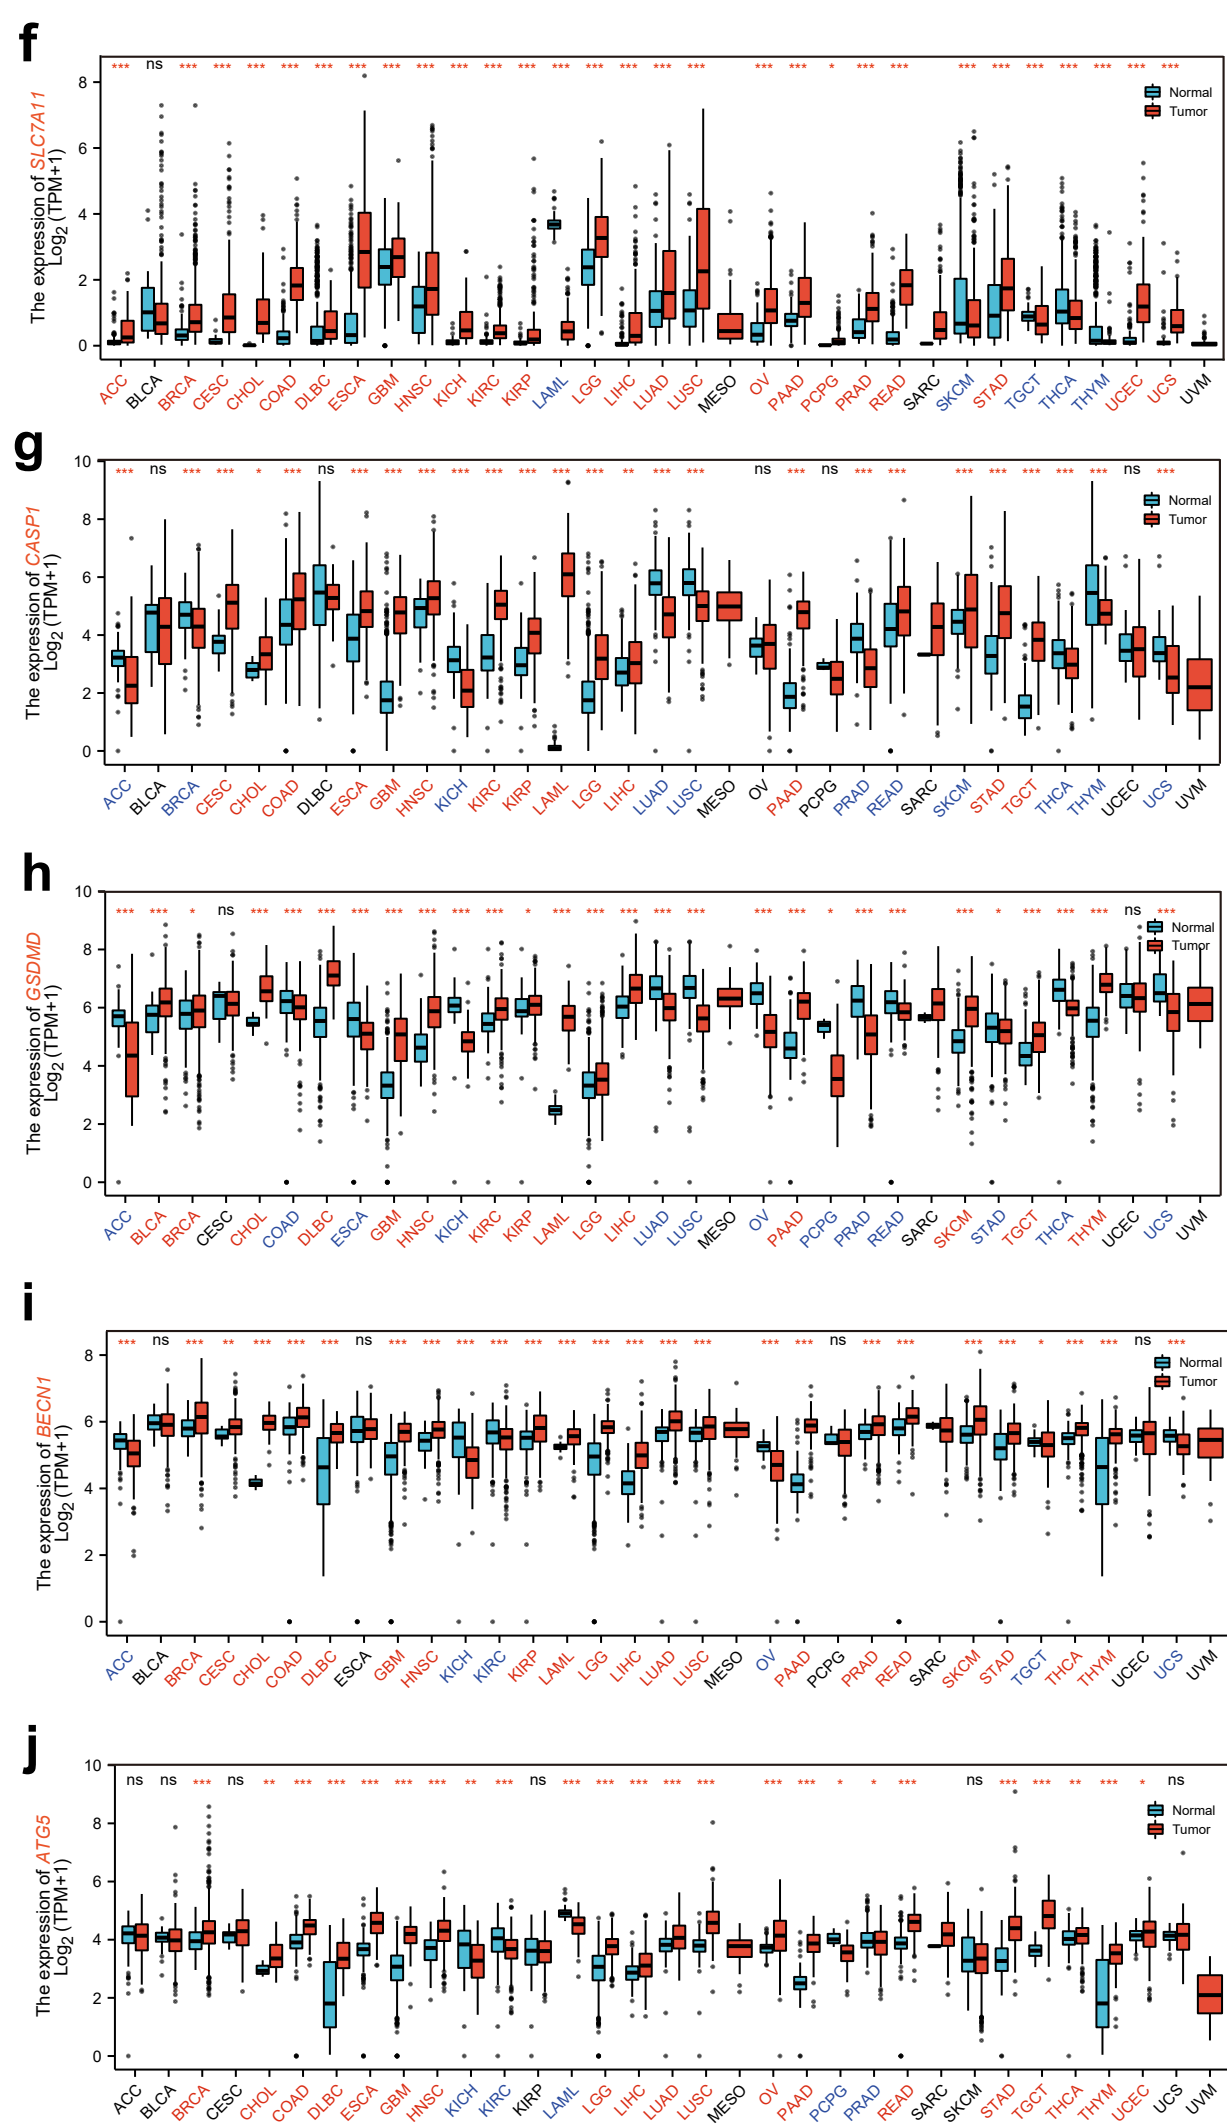

Supplement: Supplementary file 10 [file 1]

a

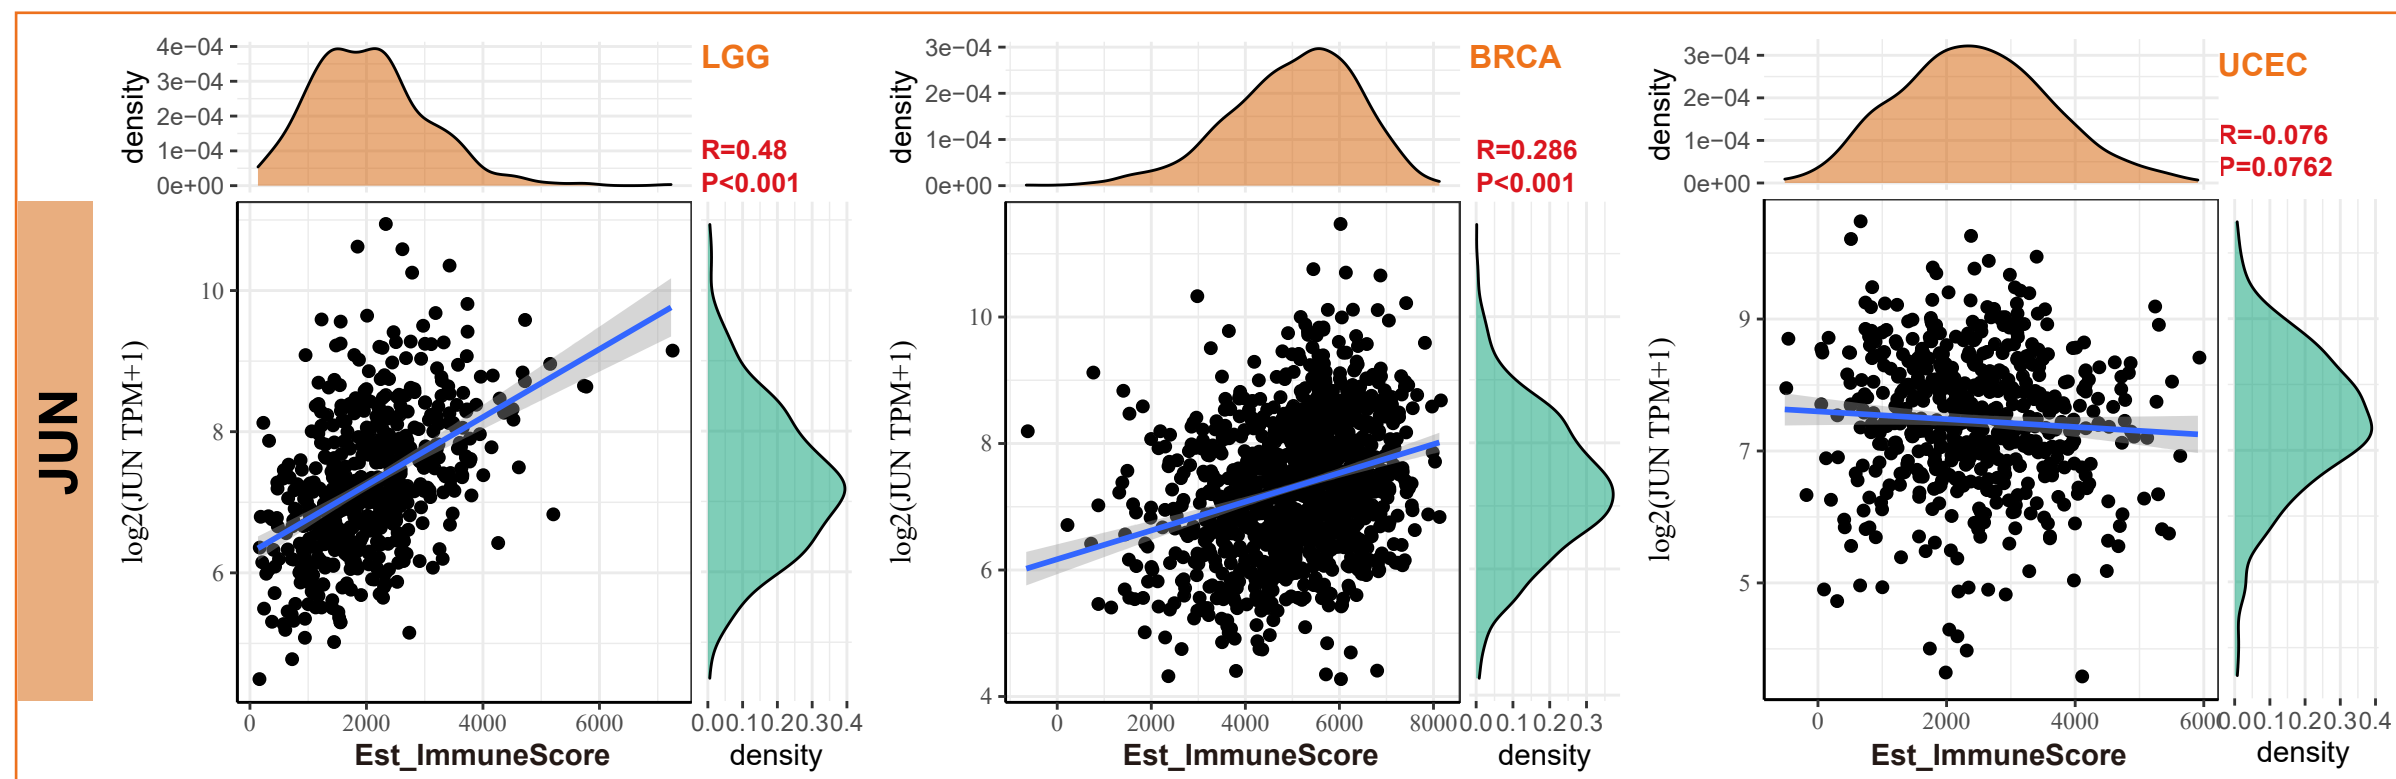

b

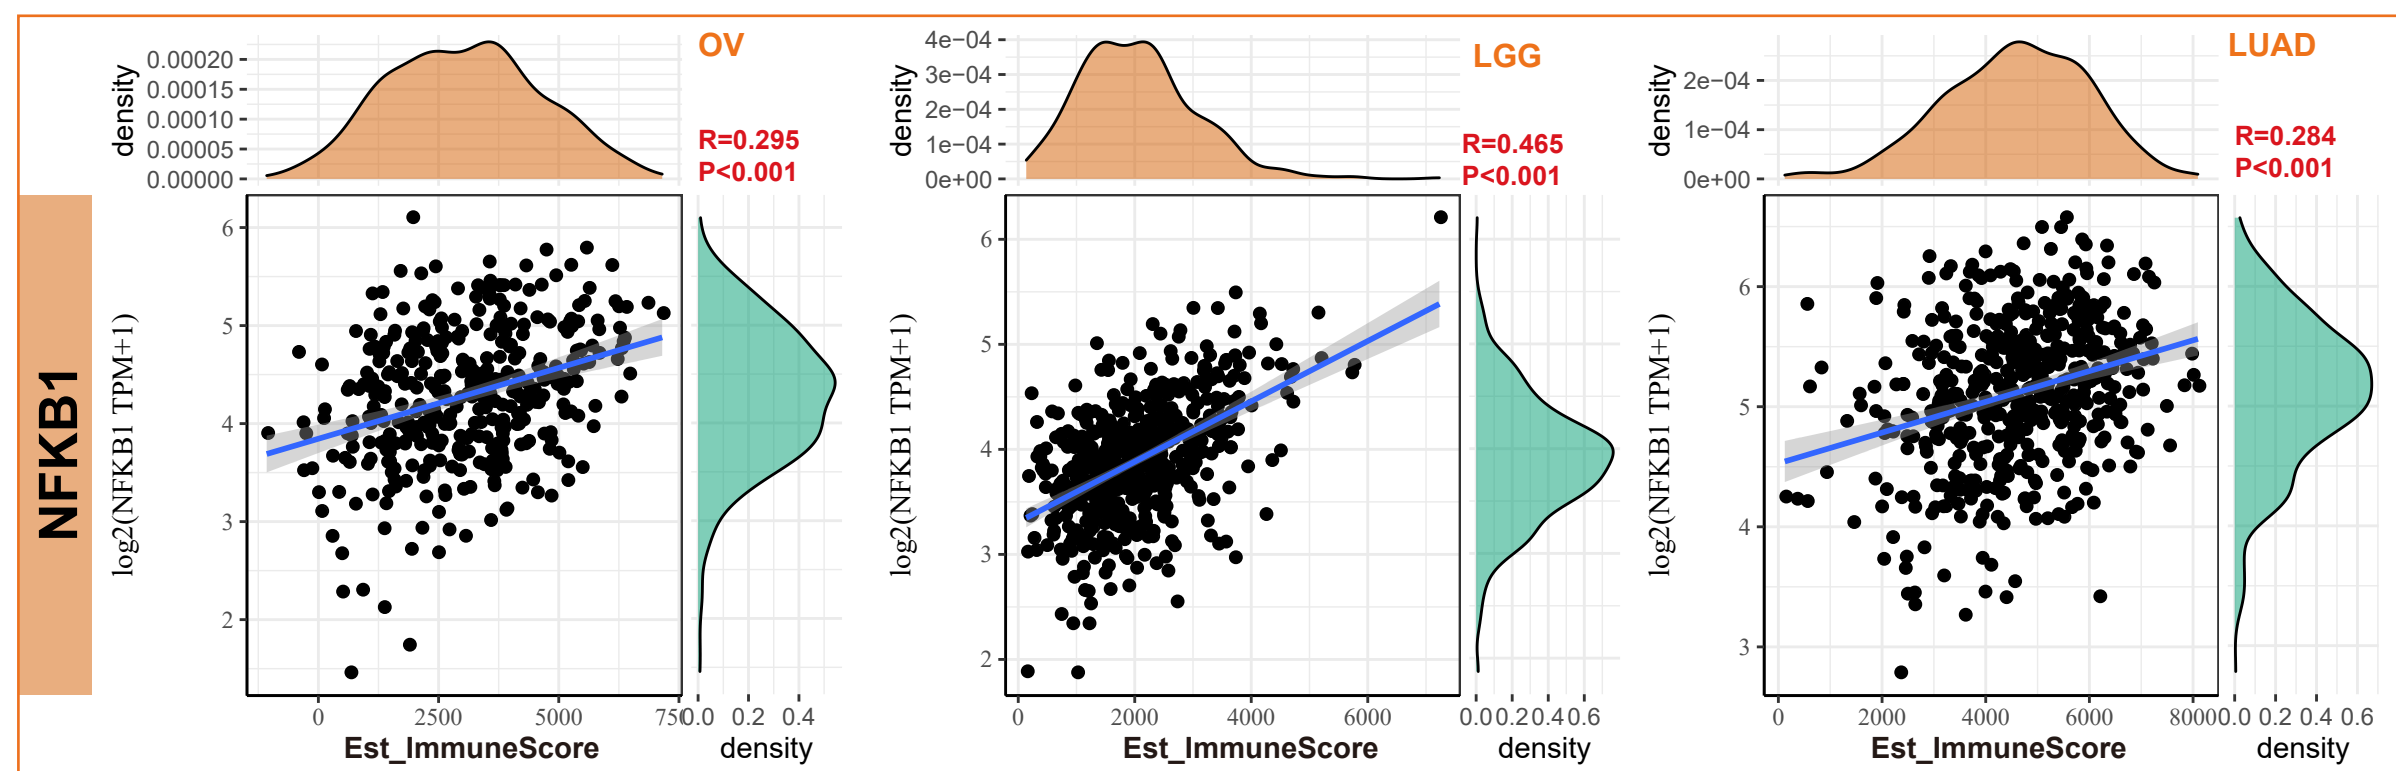

c

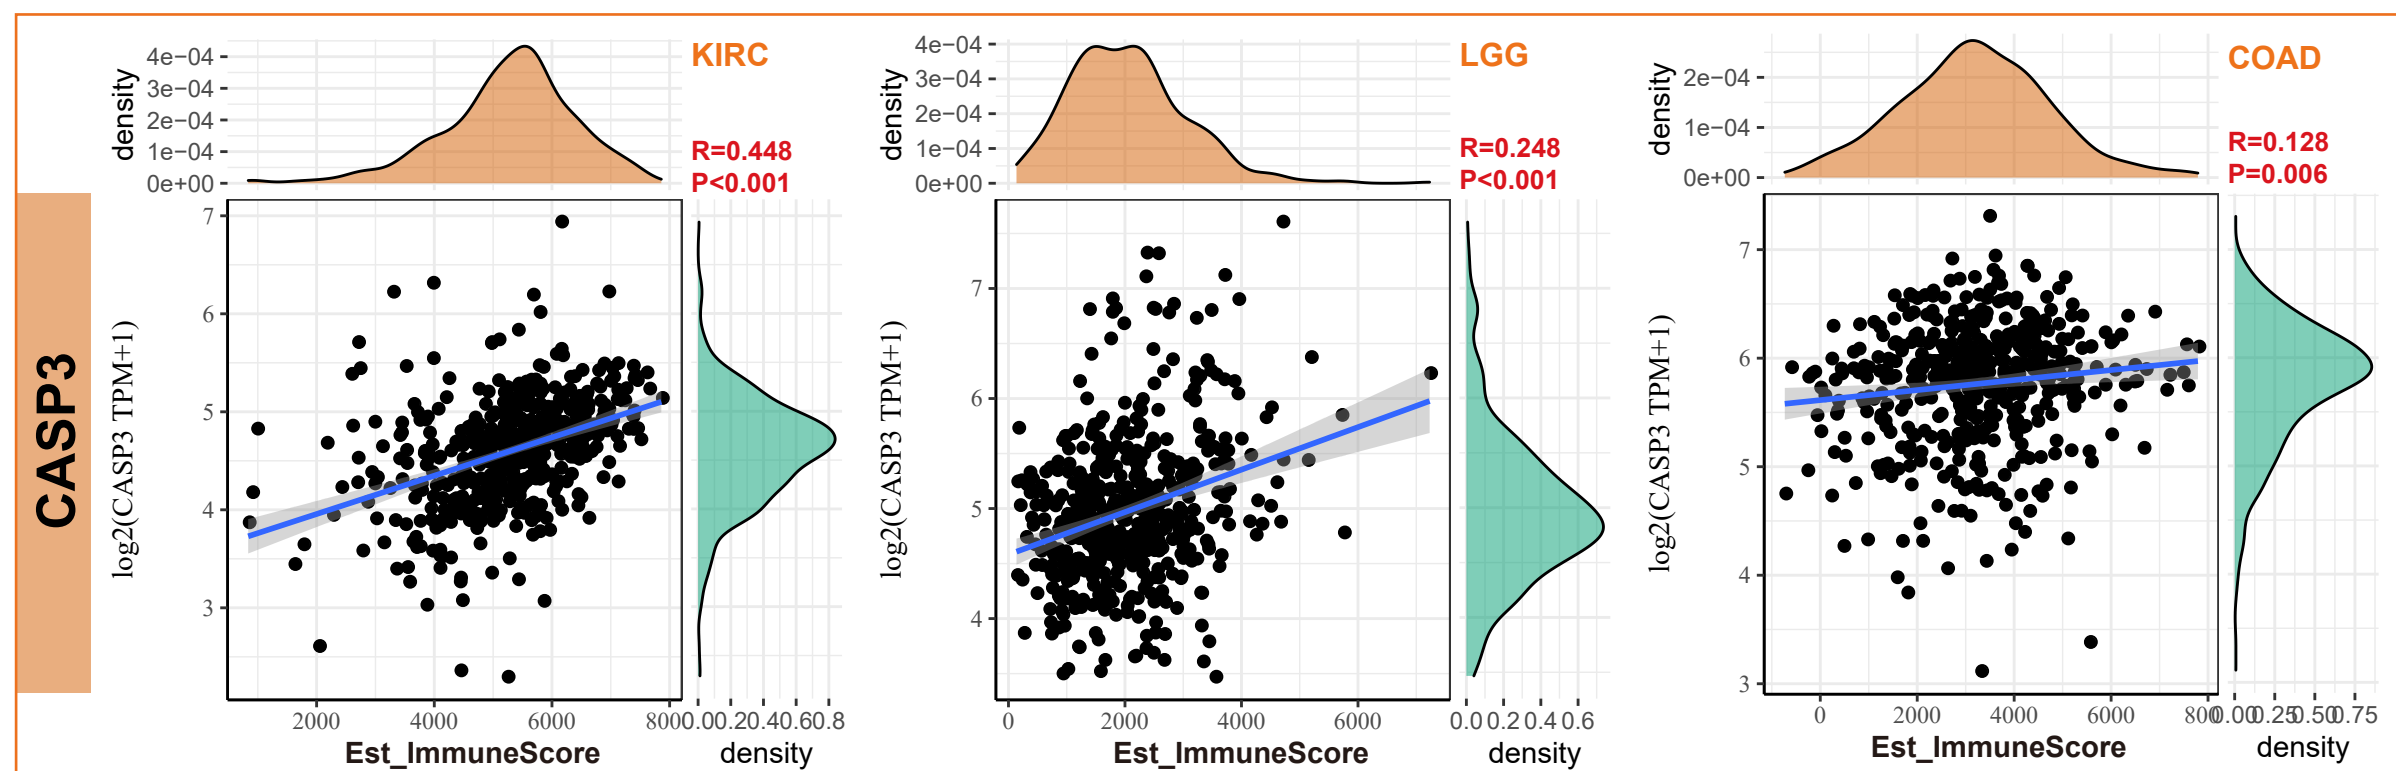

d

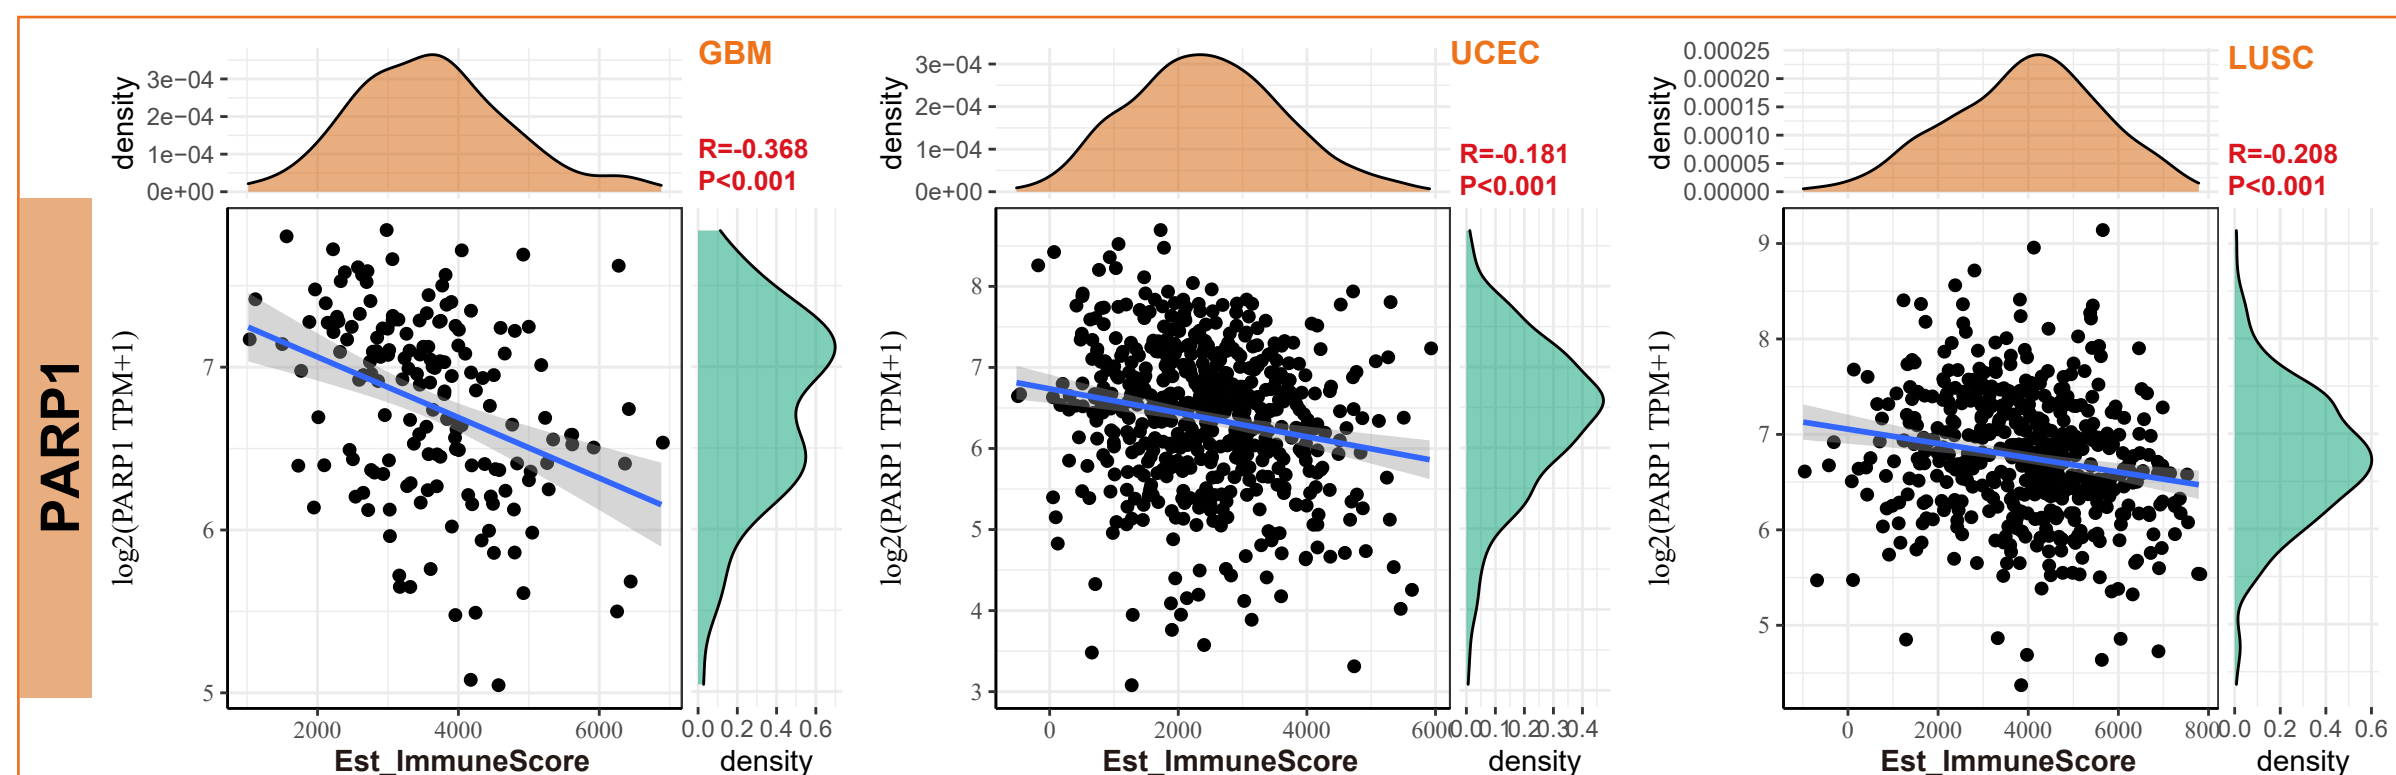

e

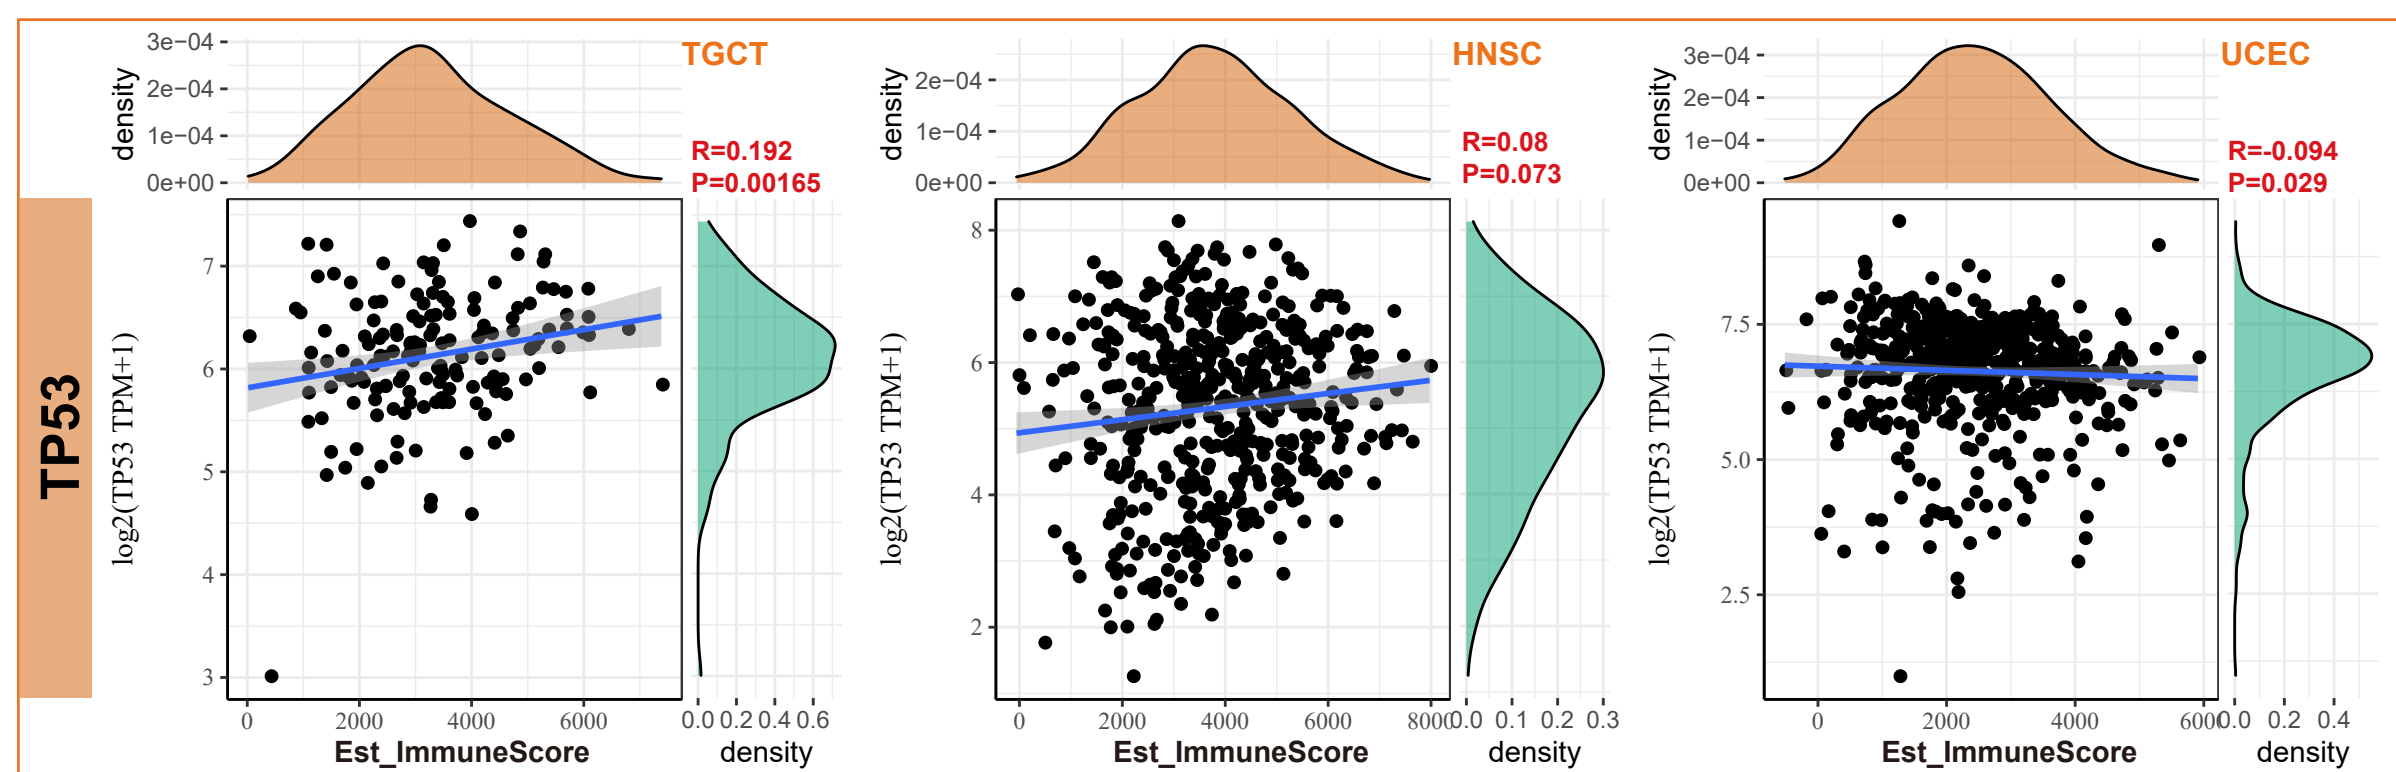

Supplement: Supplementary file 12 [file 1]

# ACC

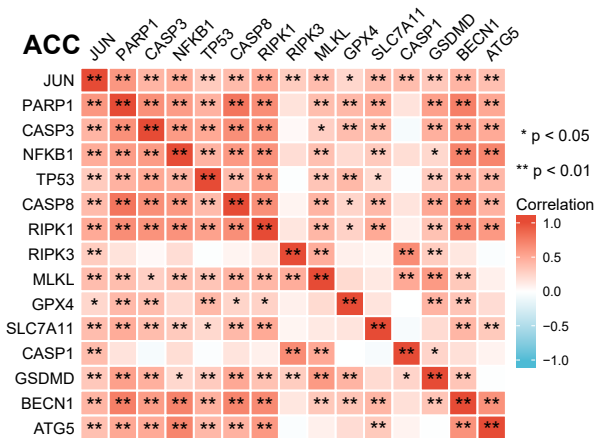

# LGG

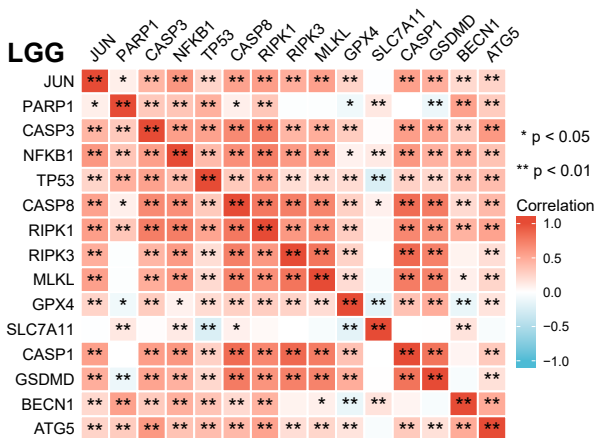

Supplement: Supplementary file 13 [file 1]

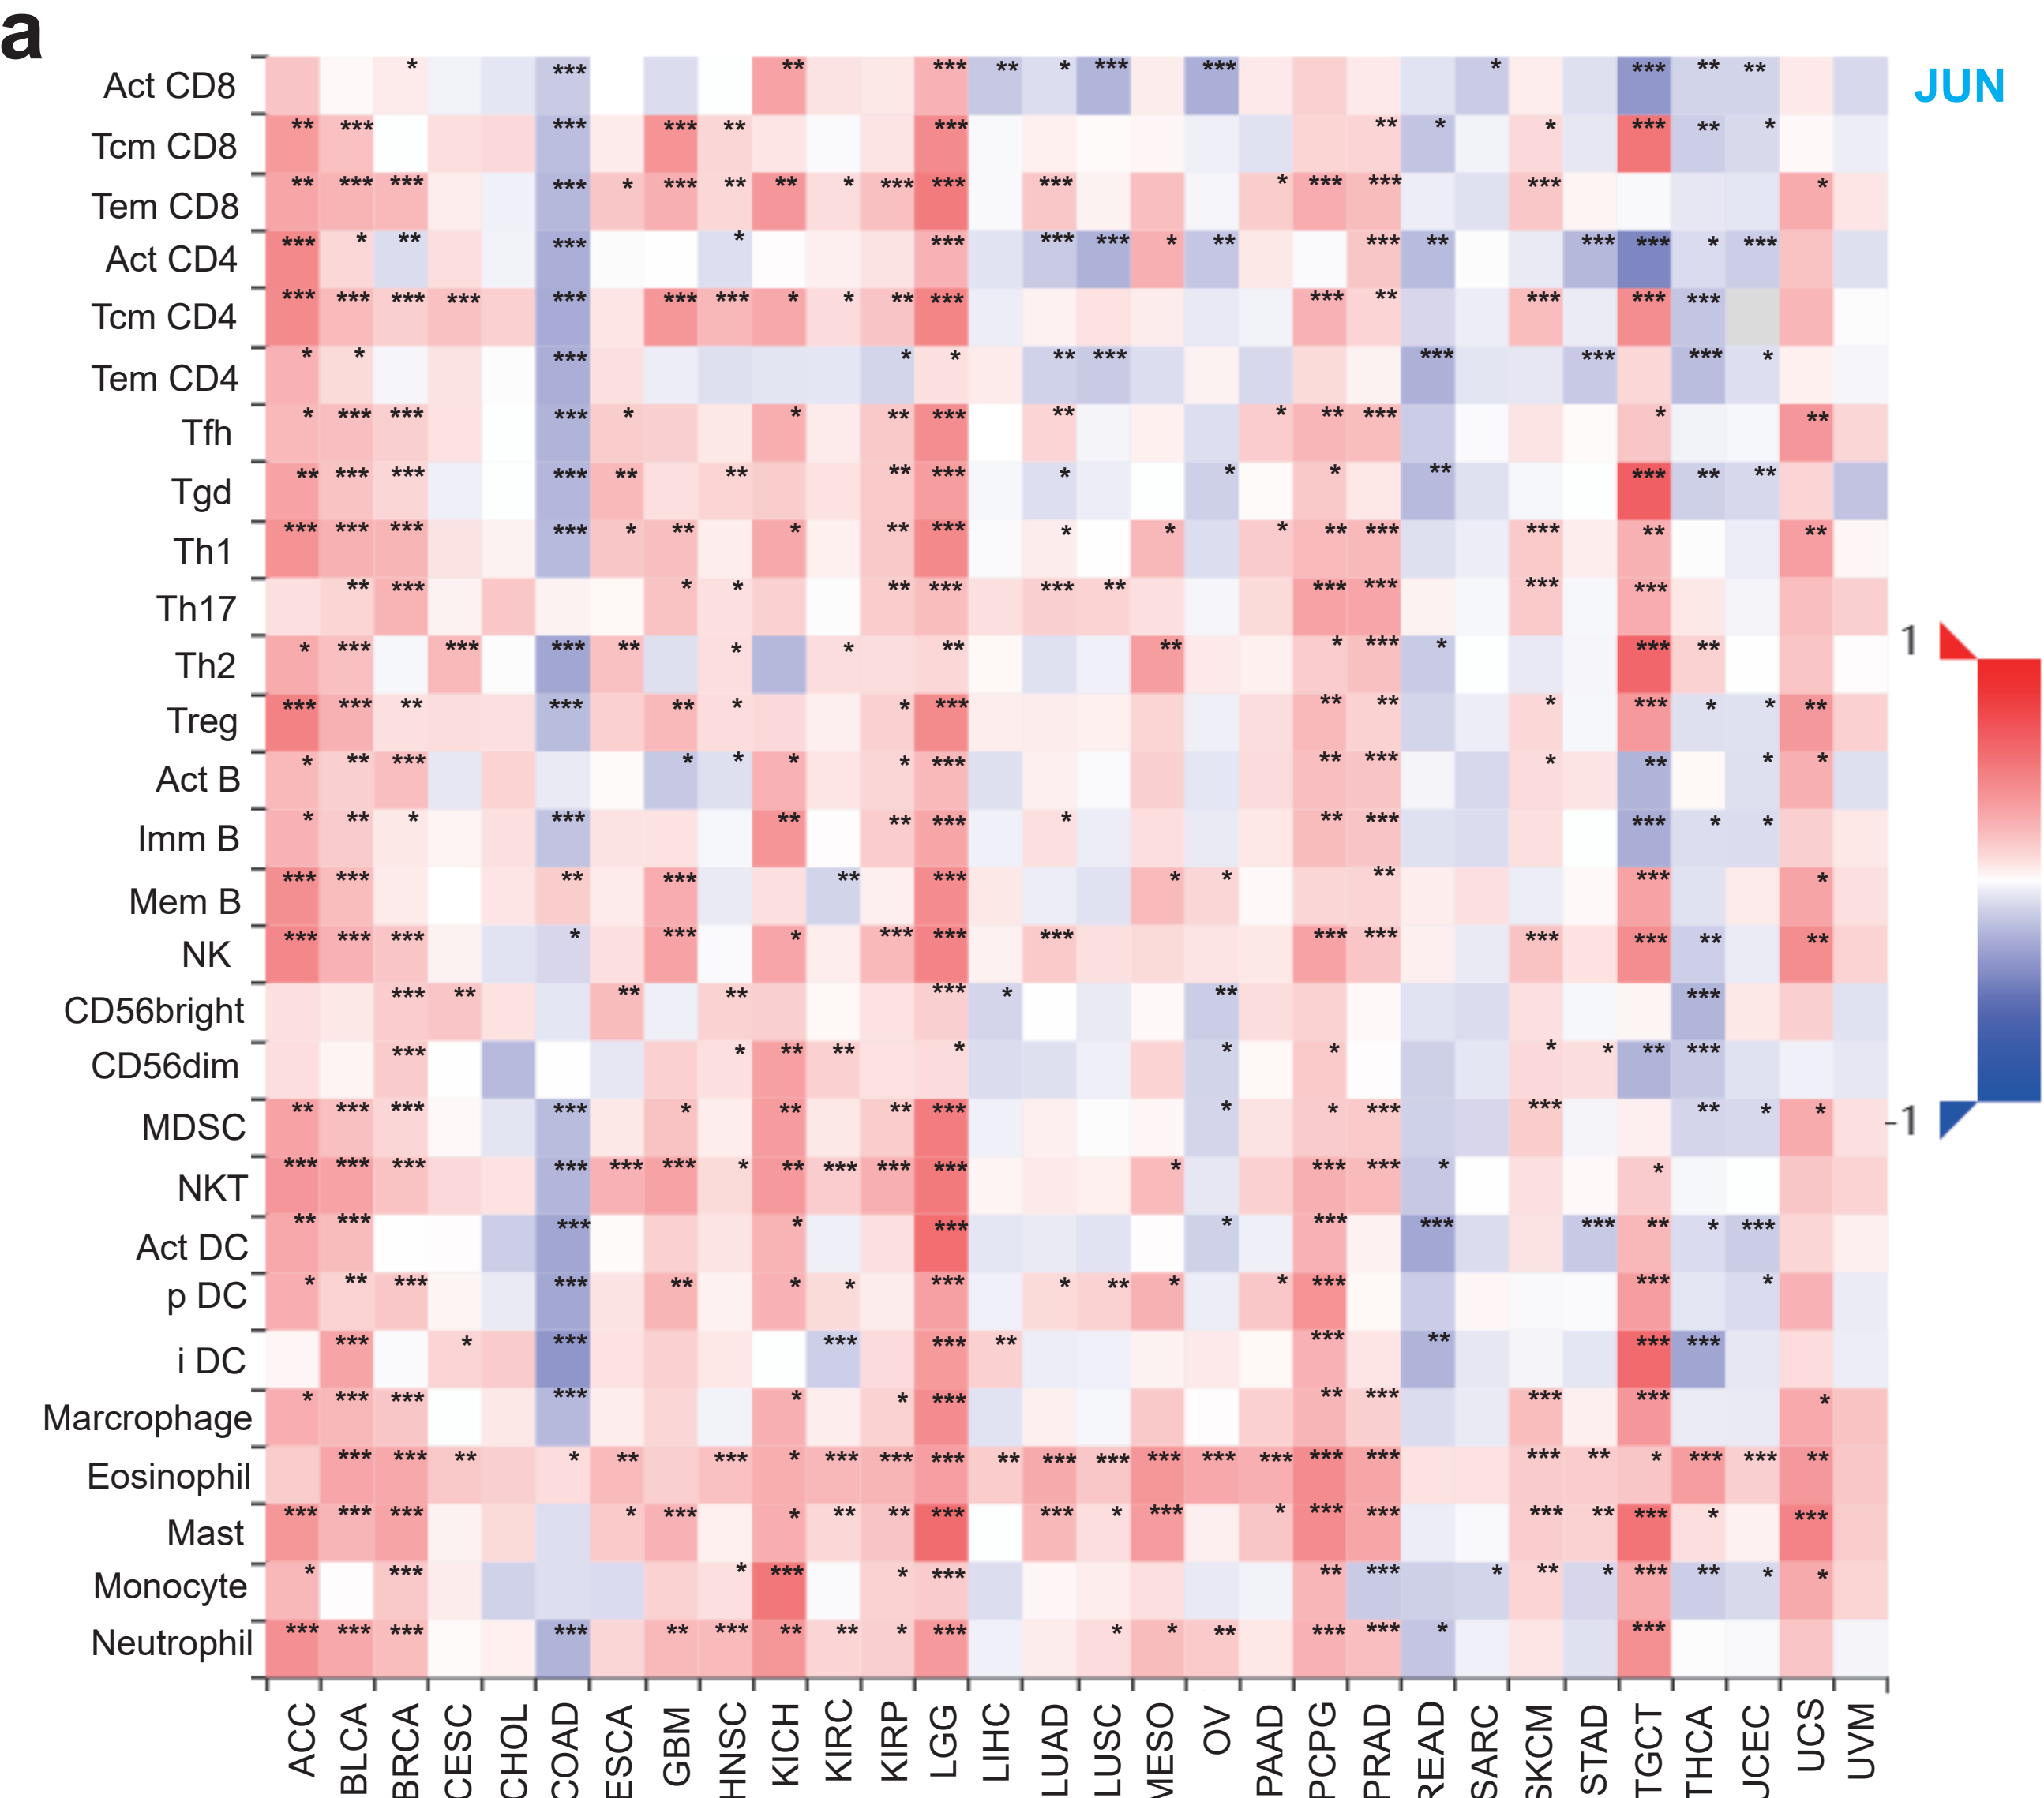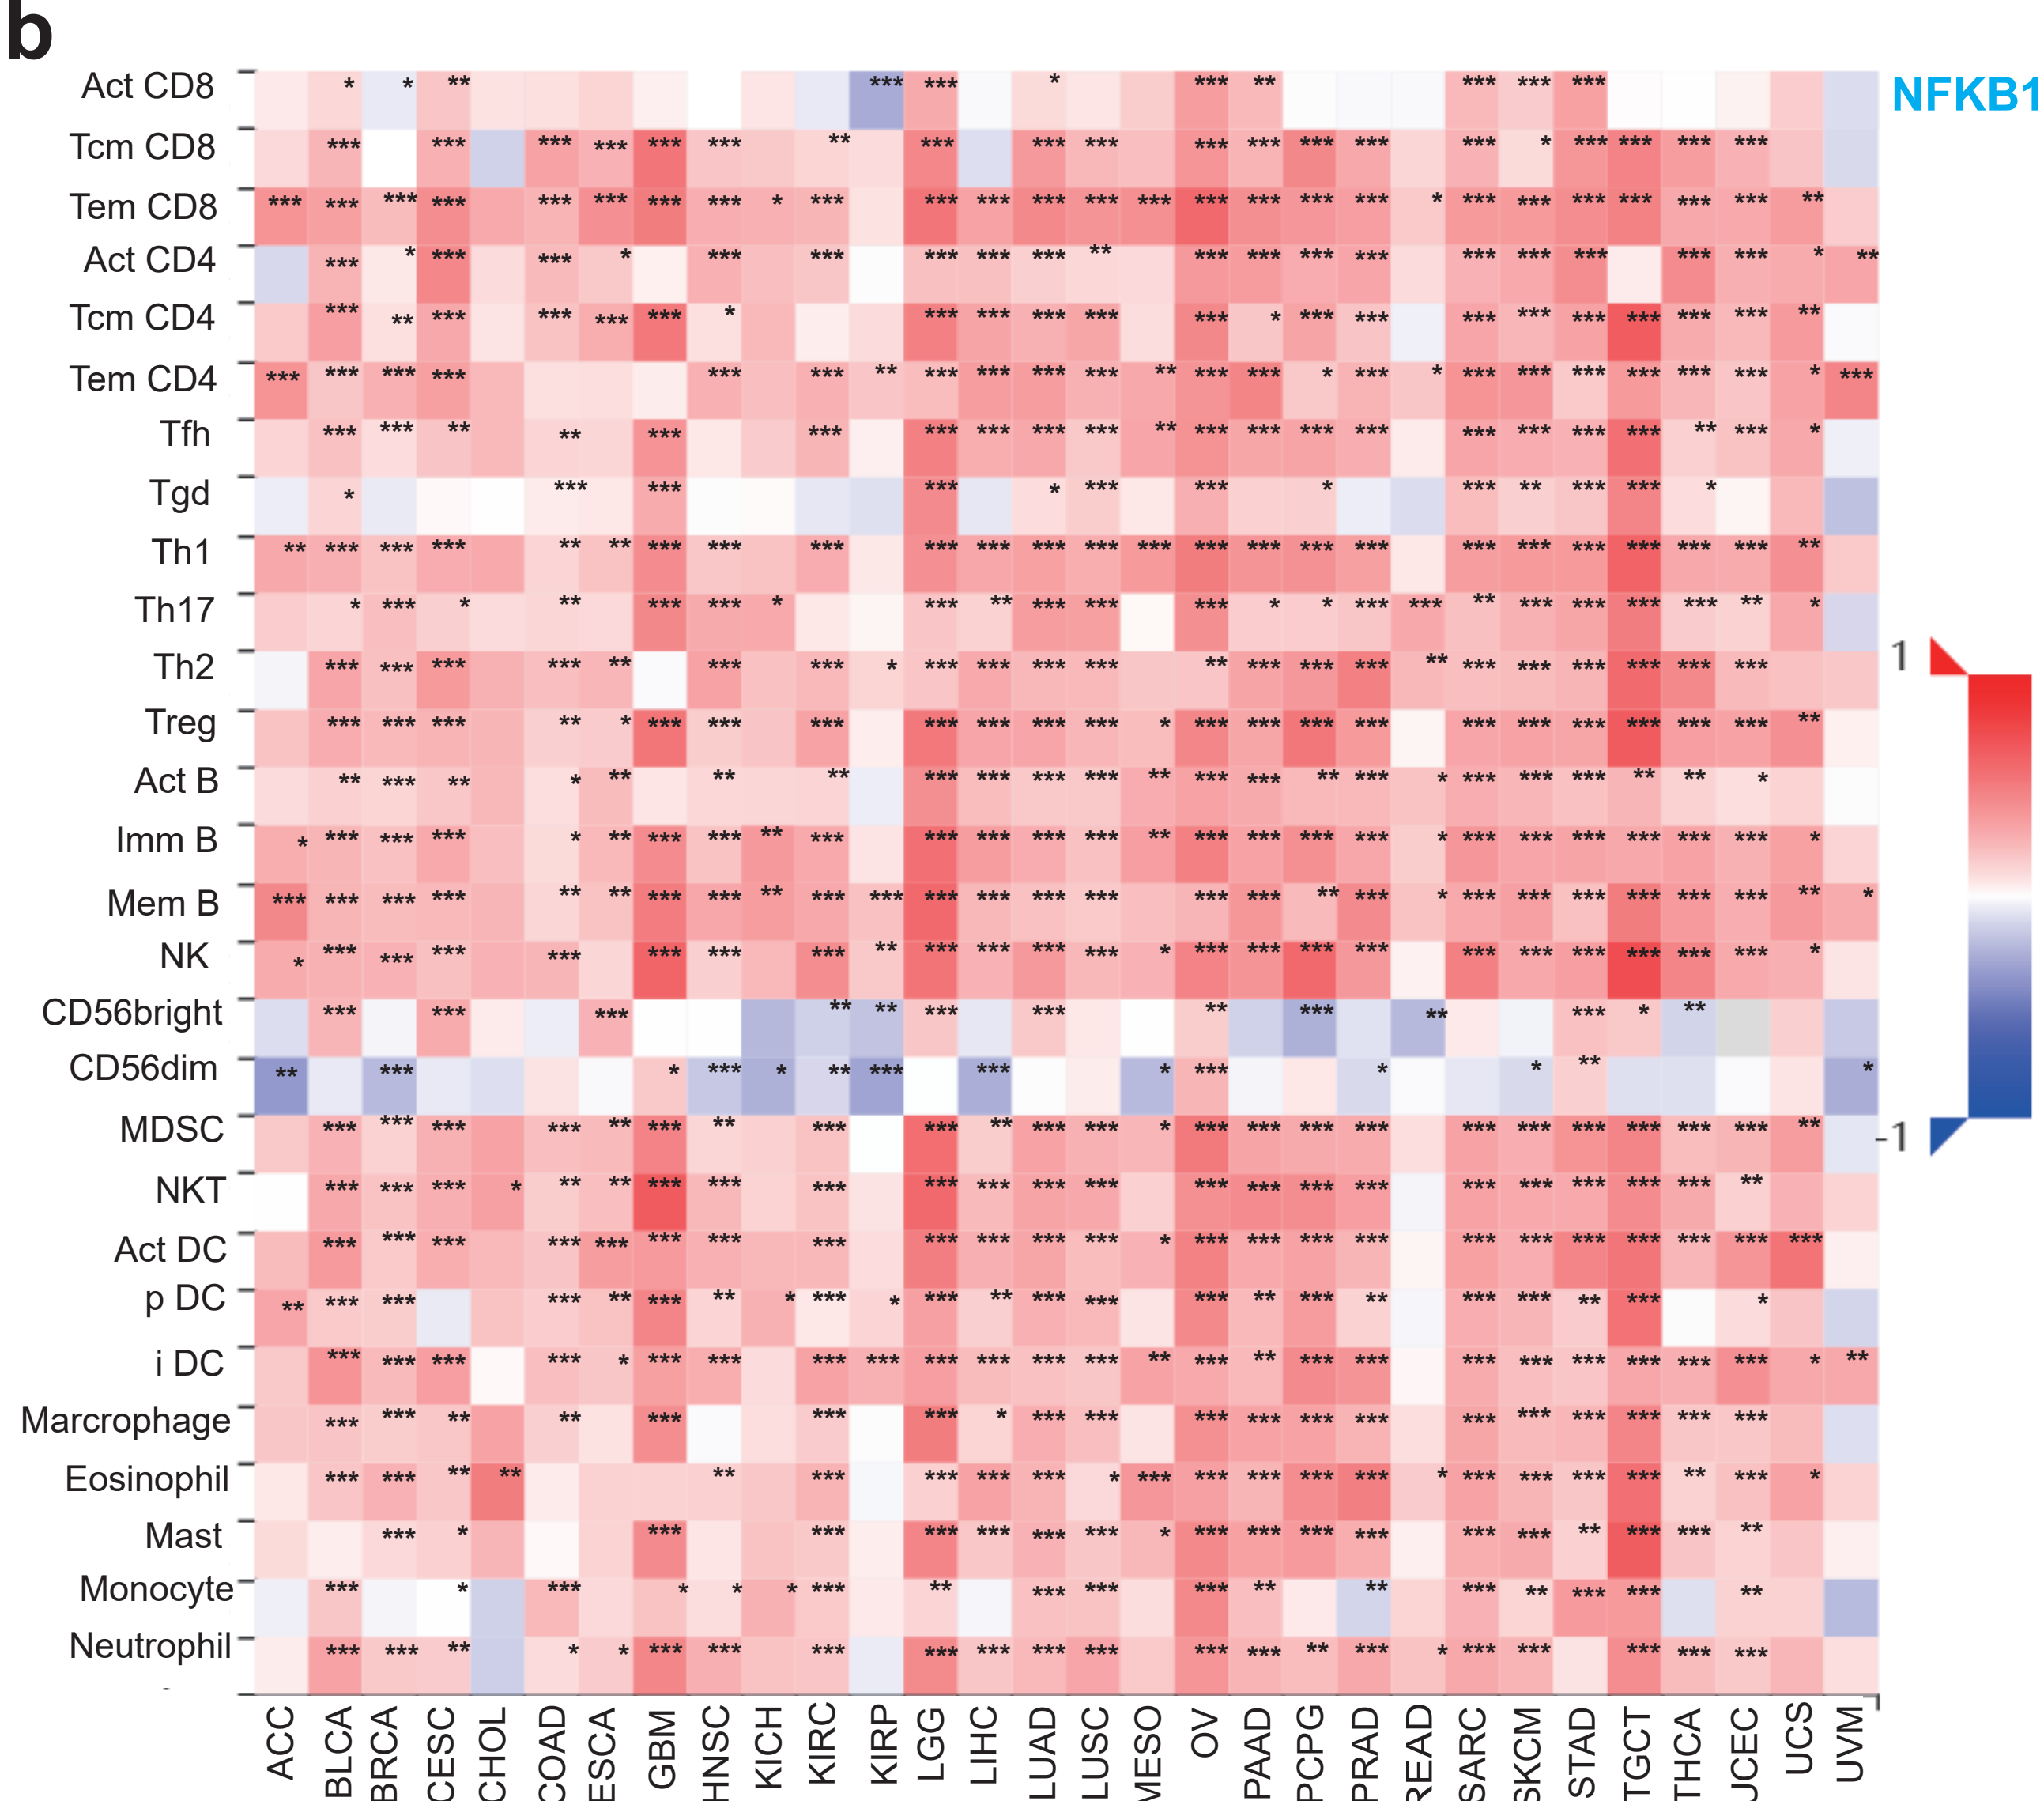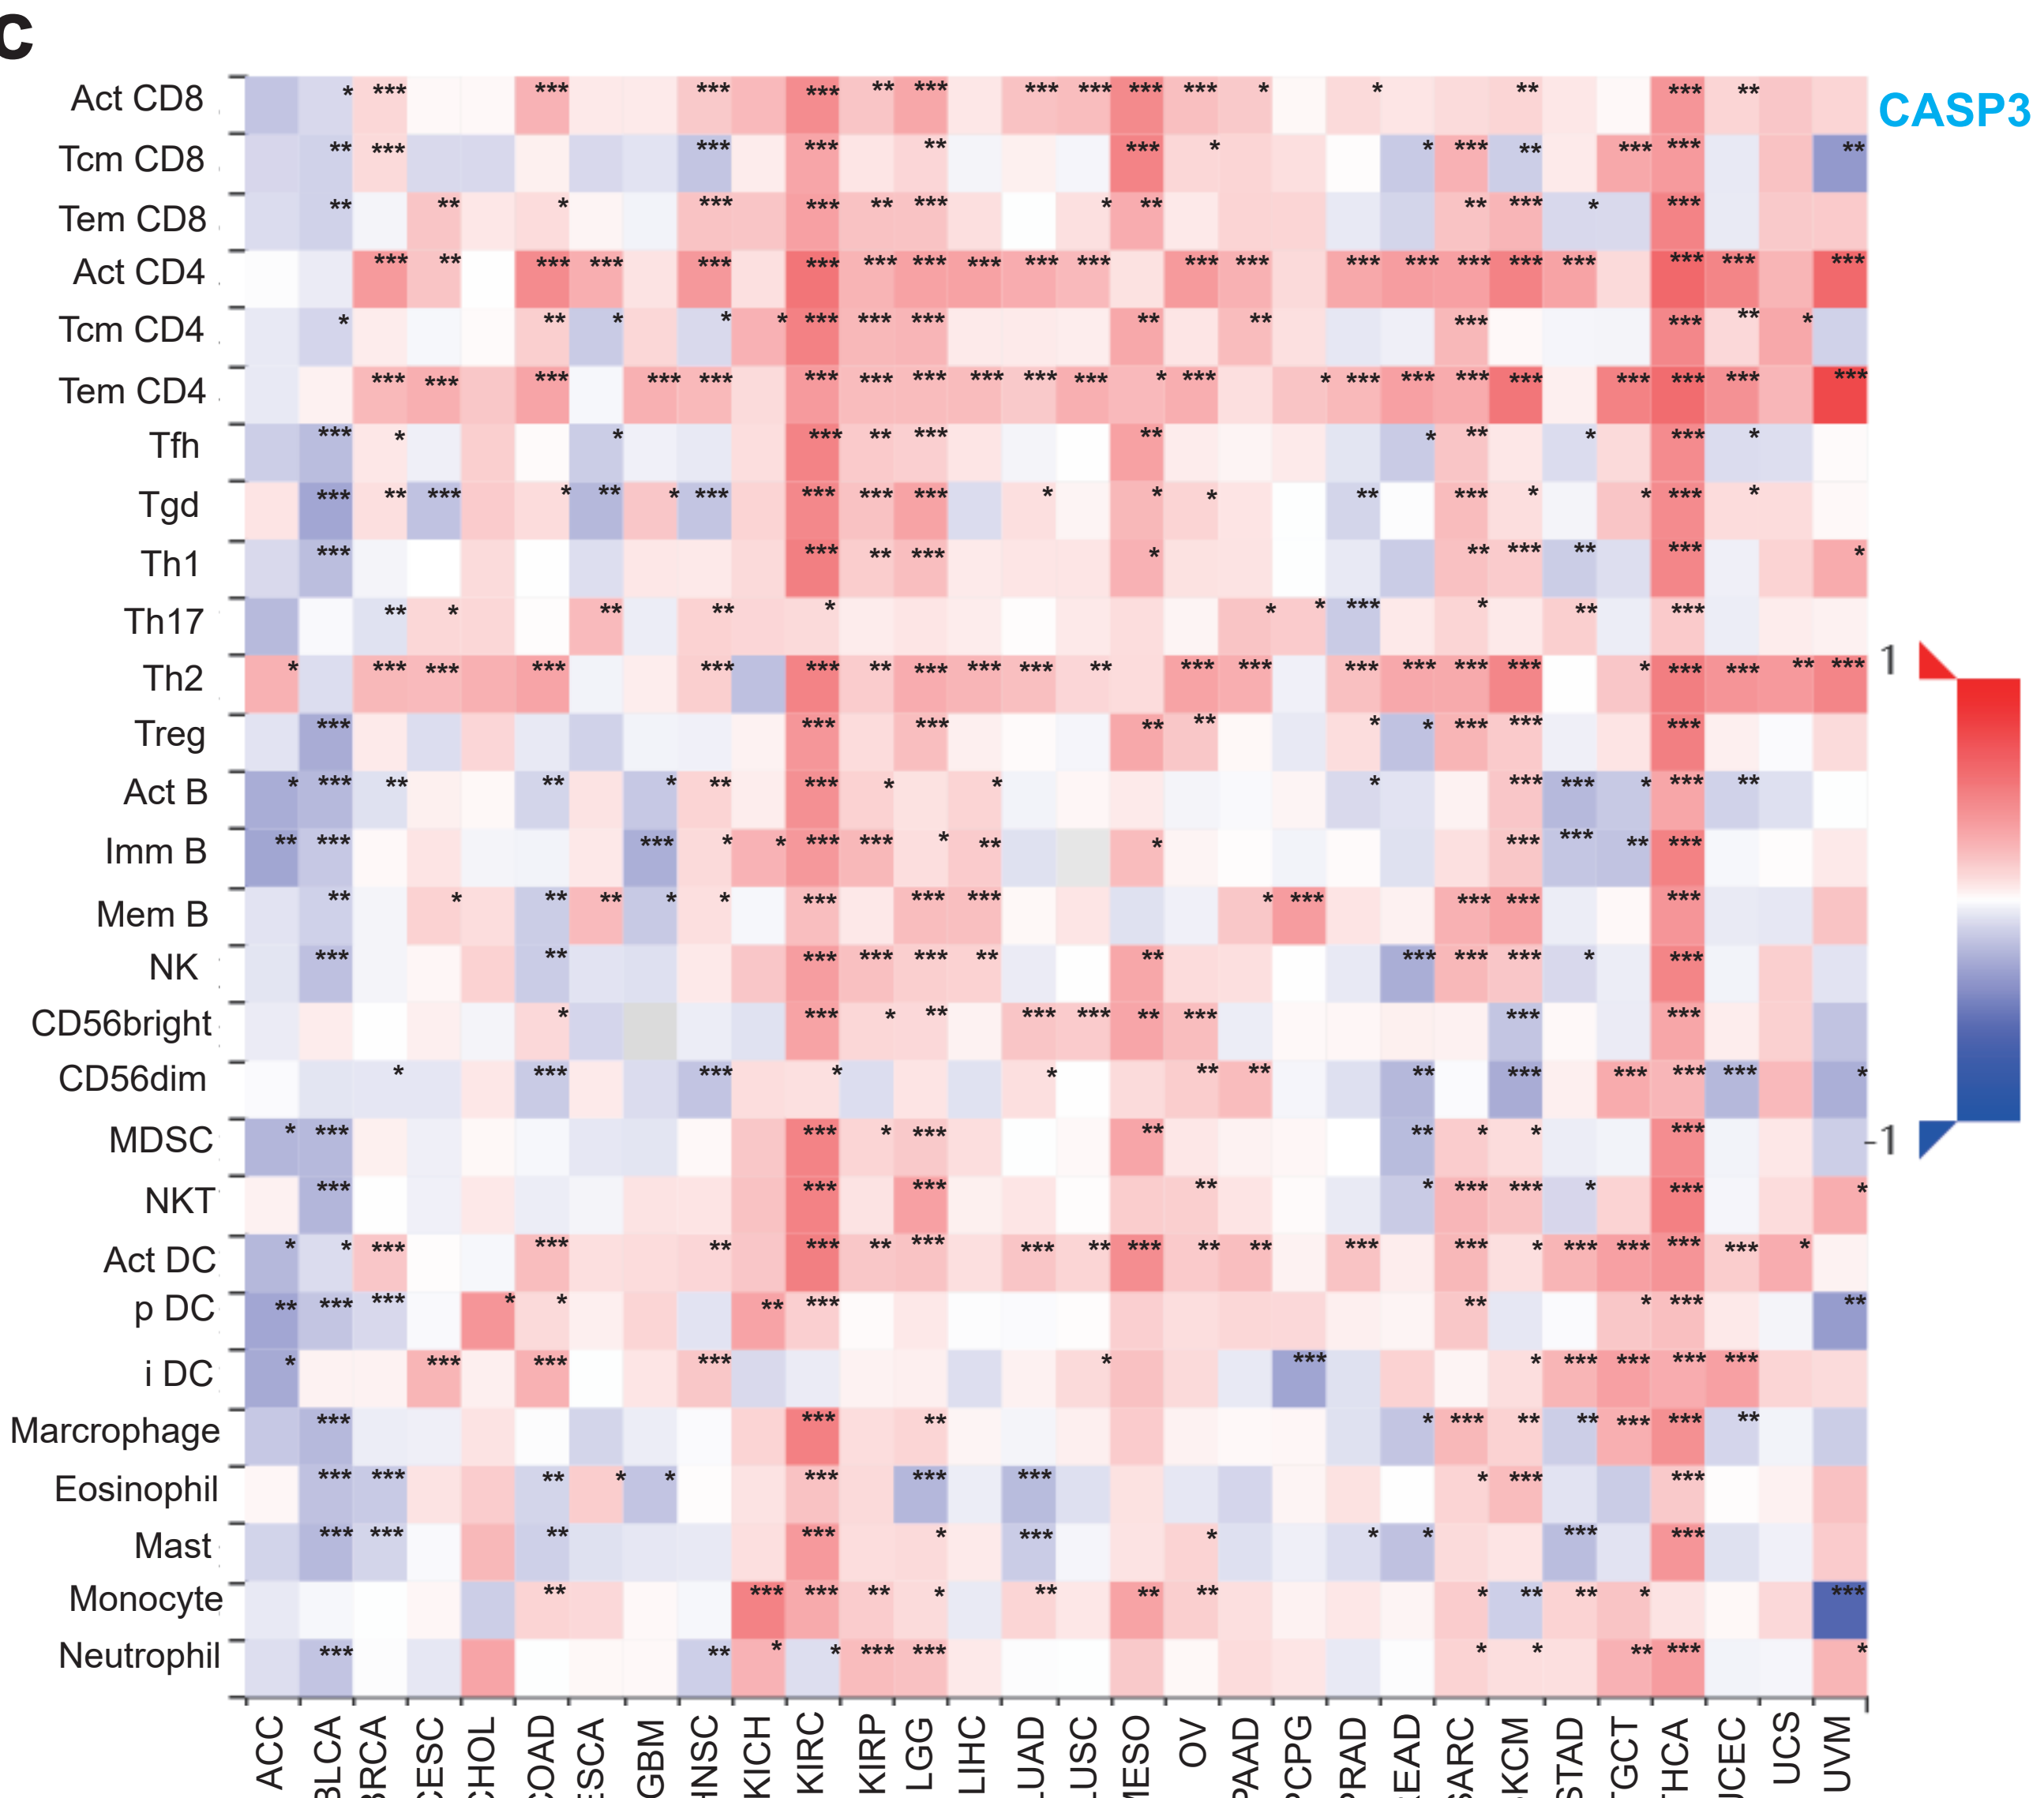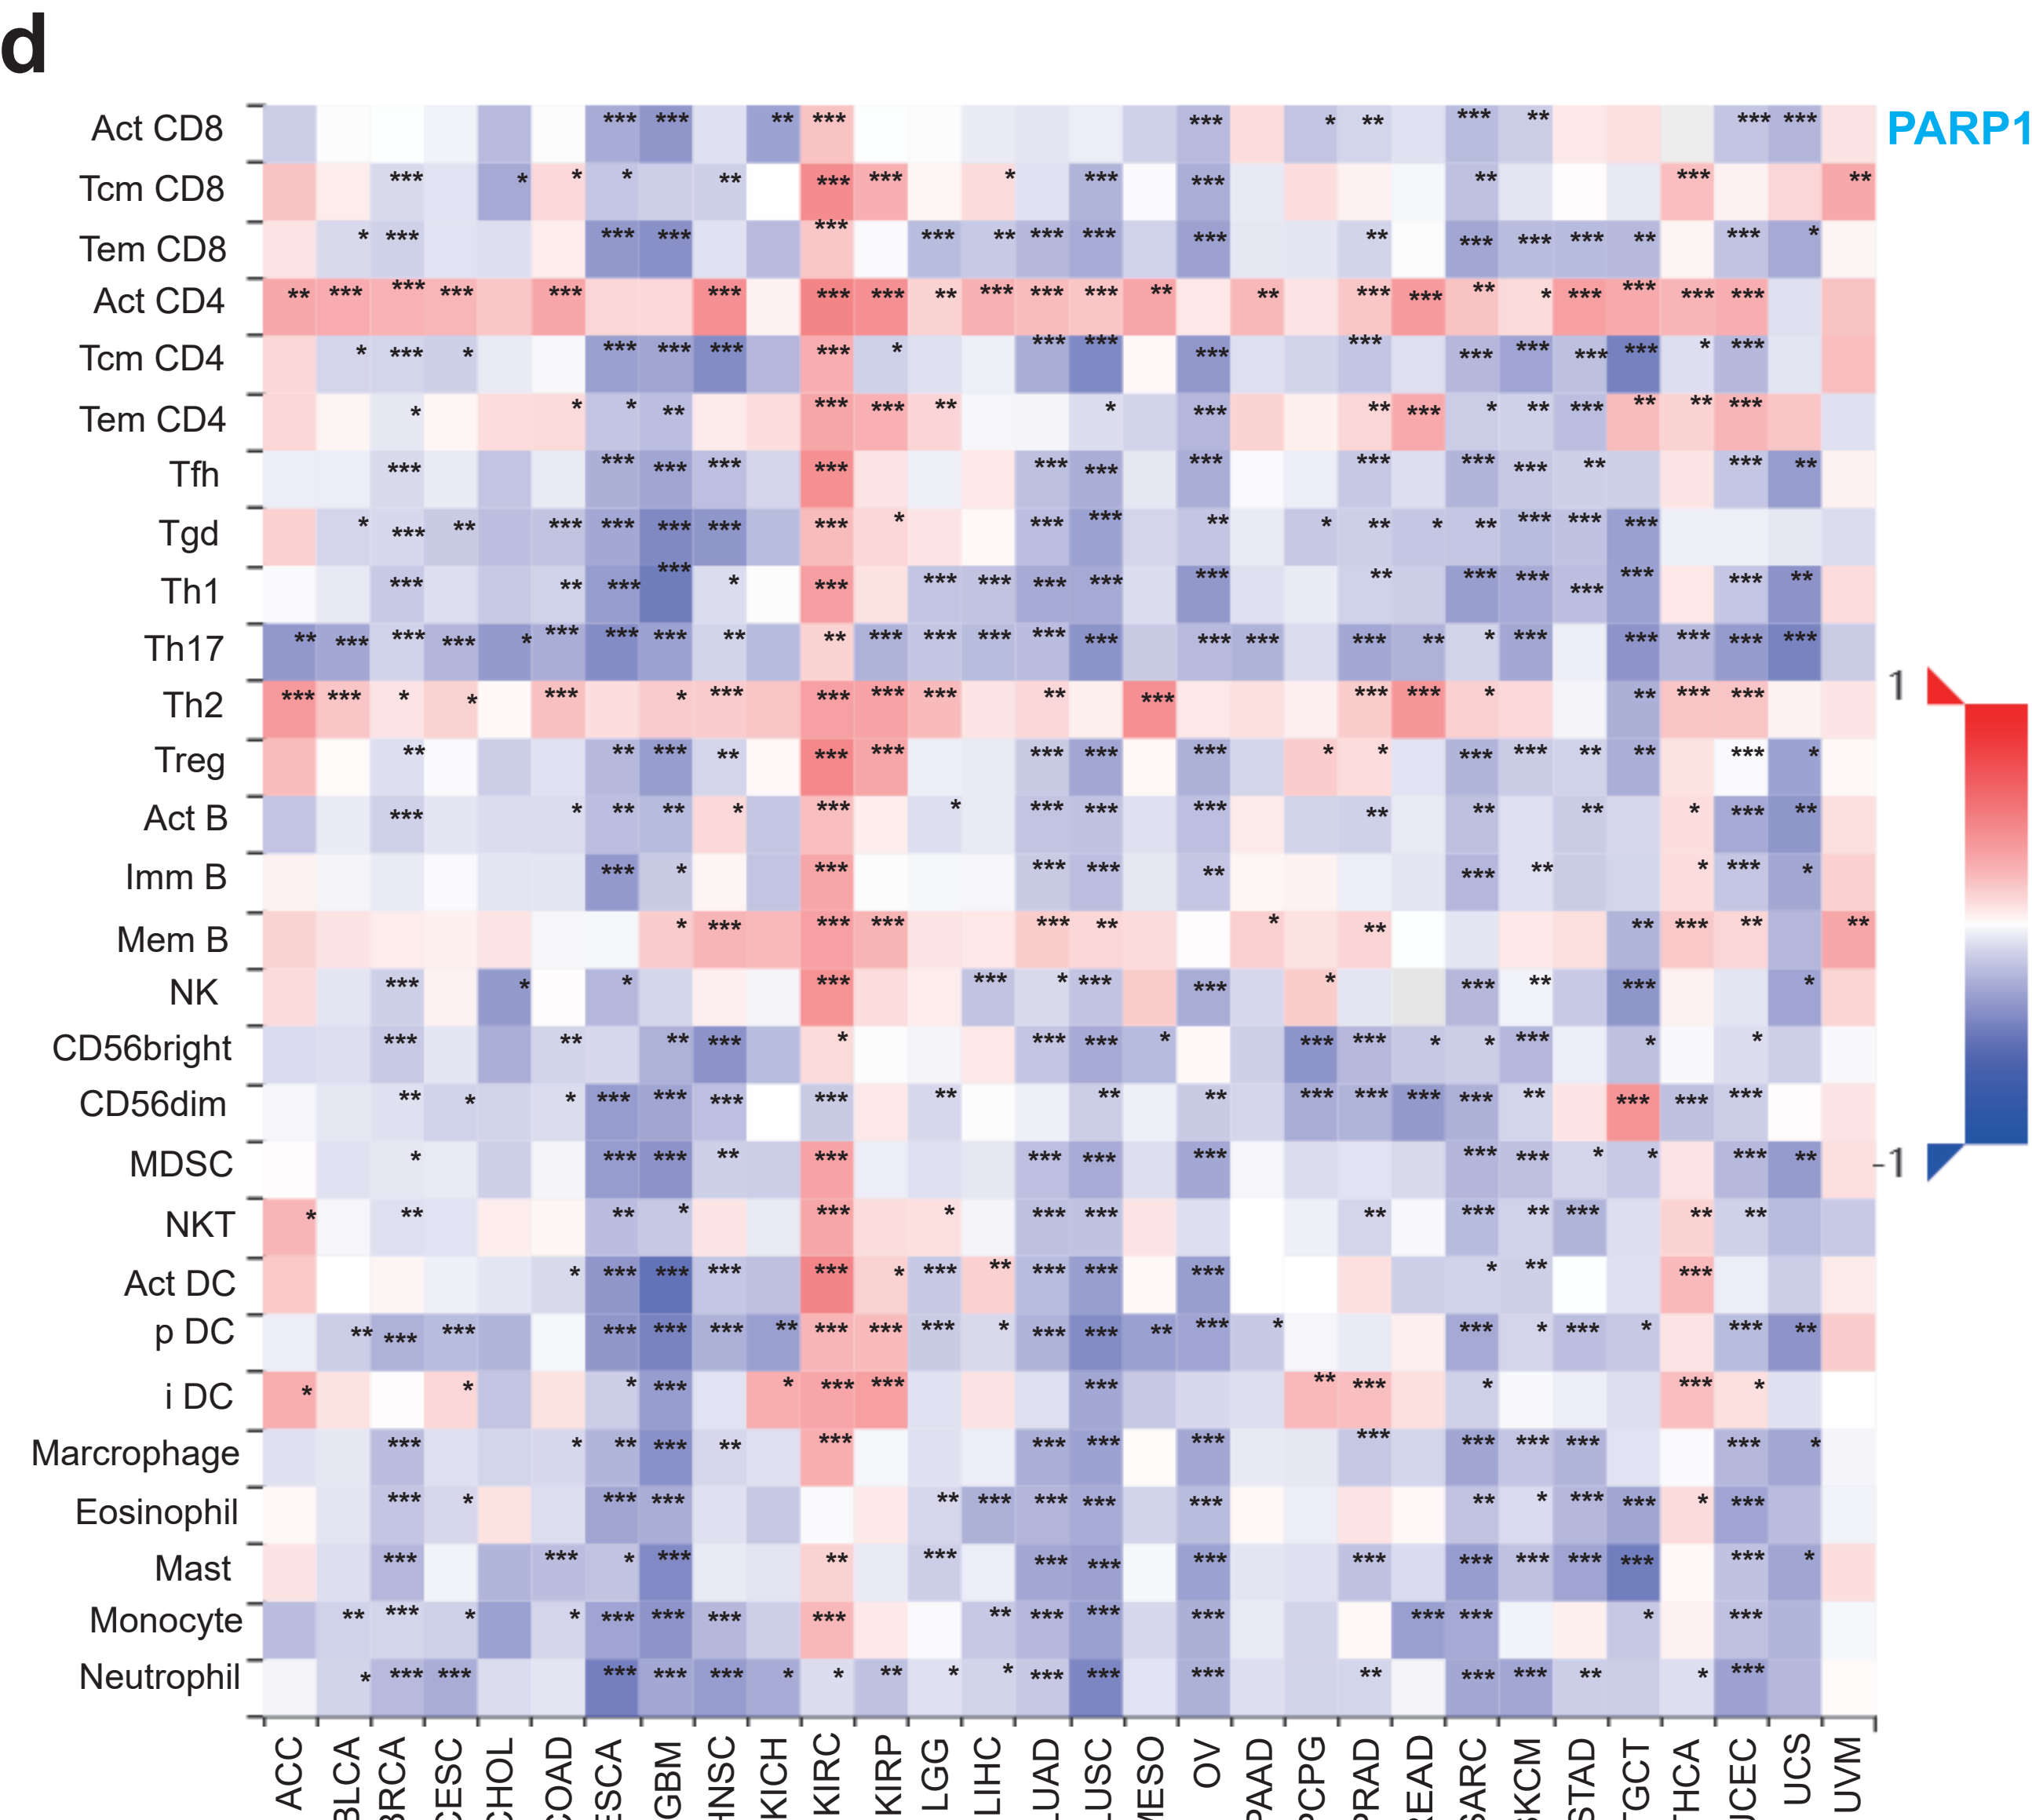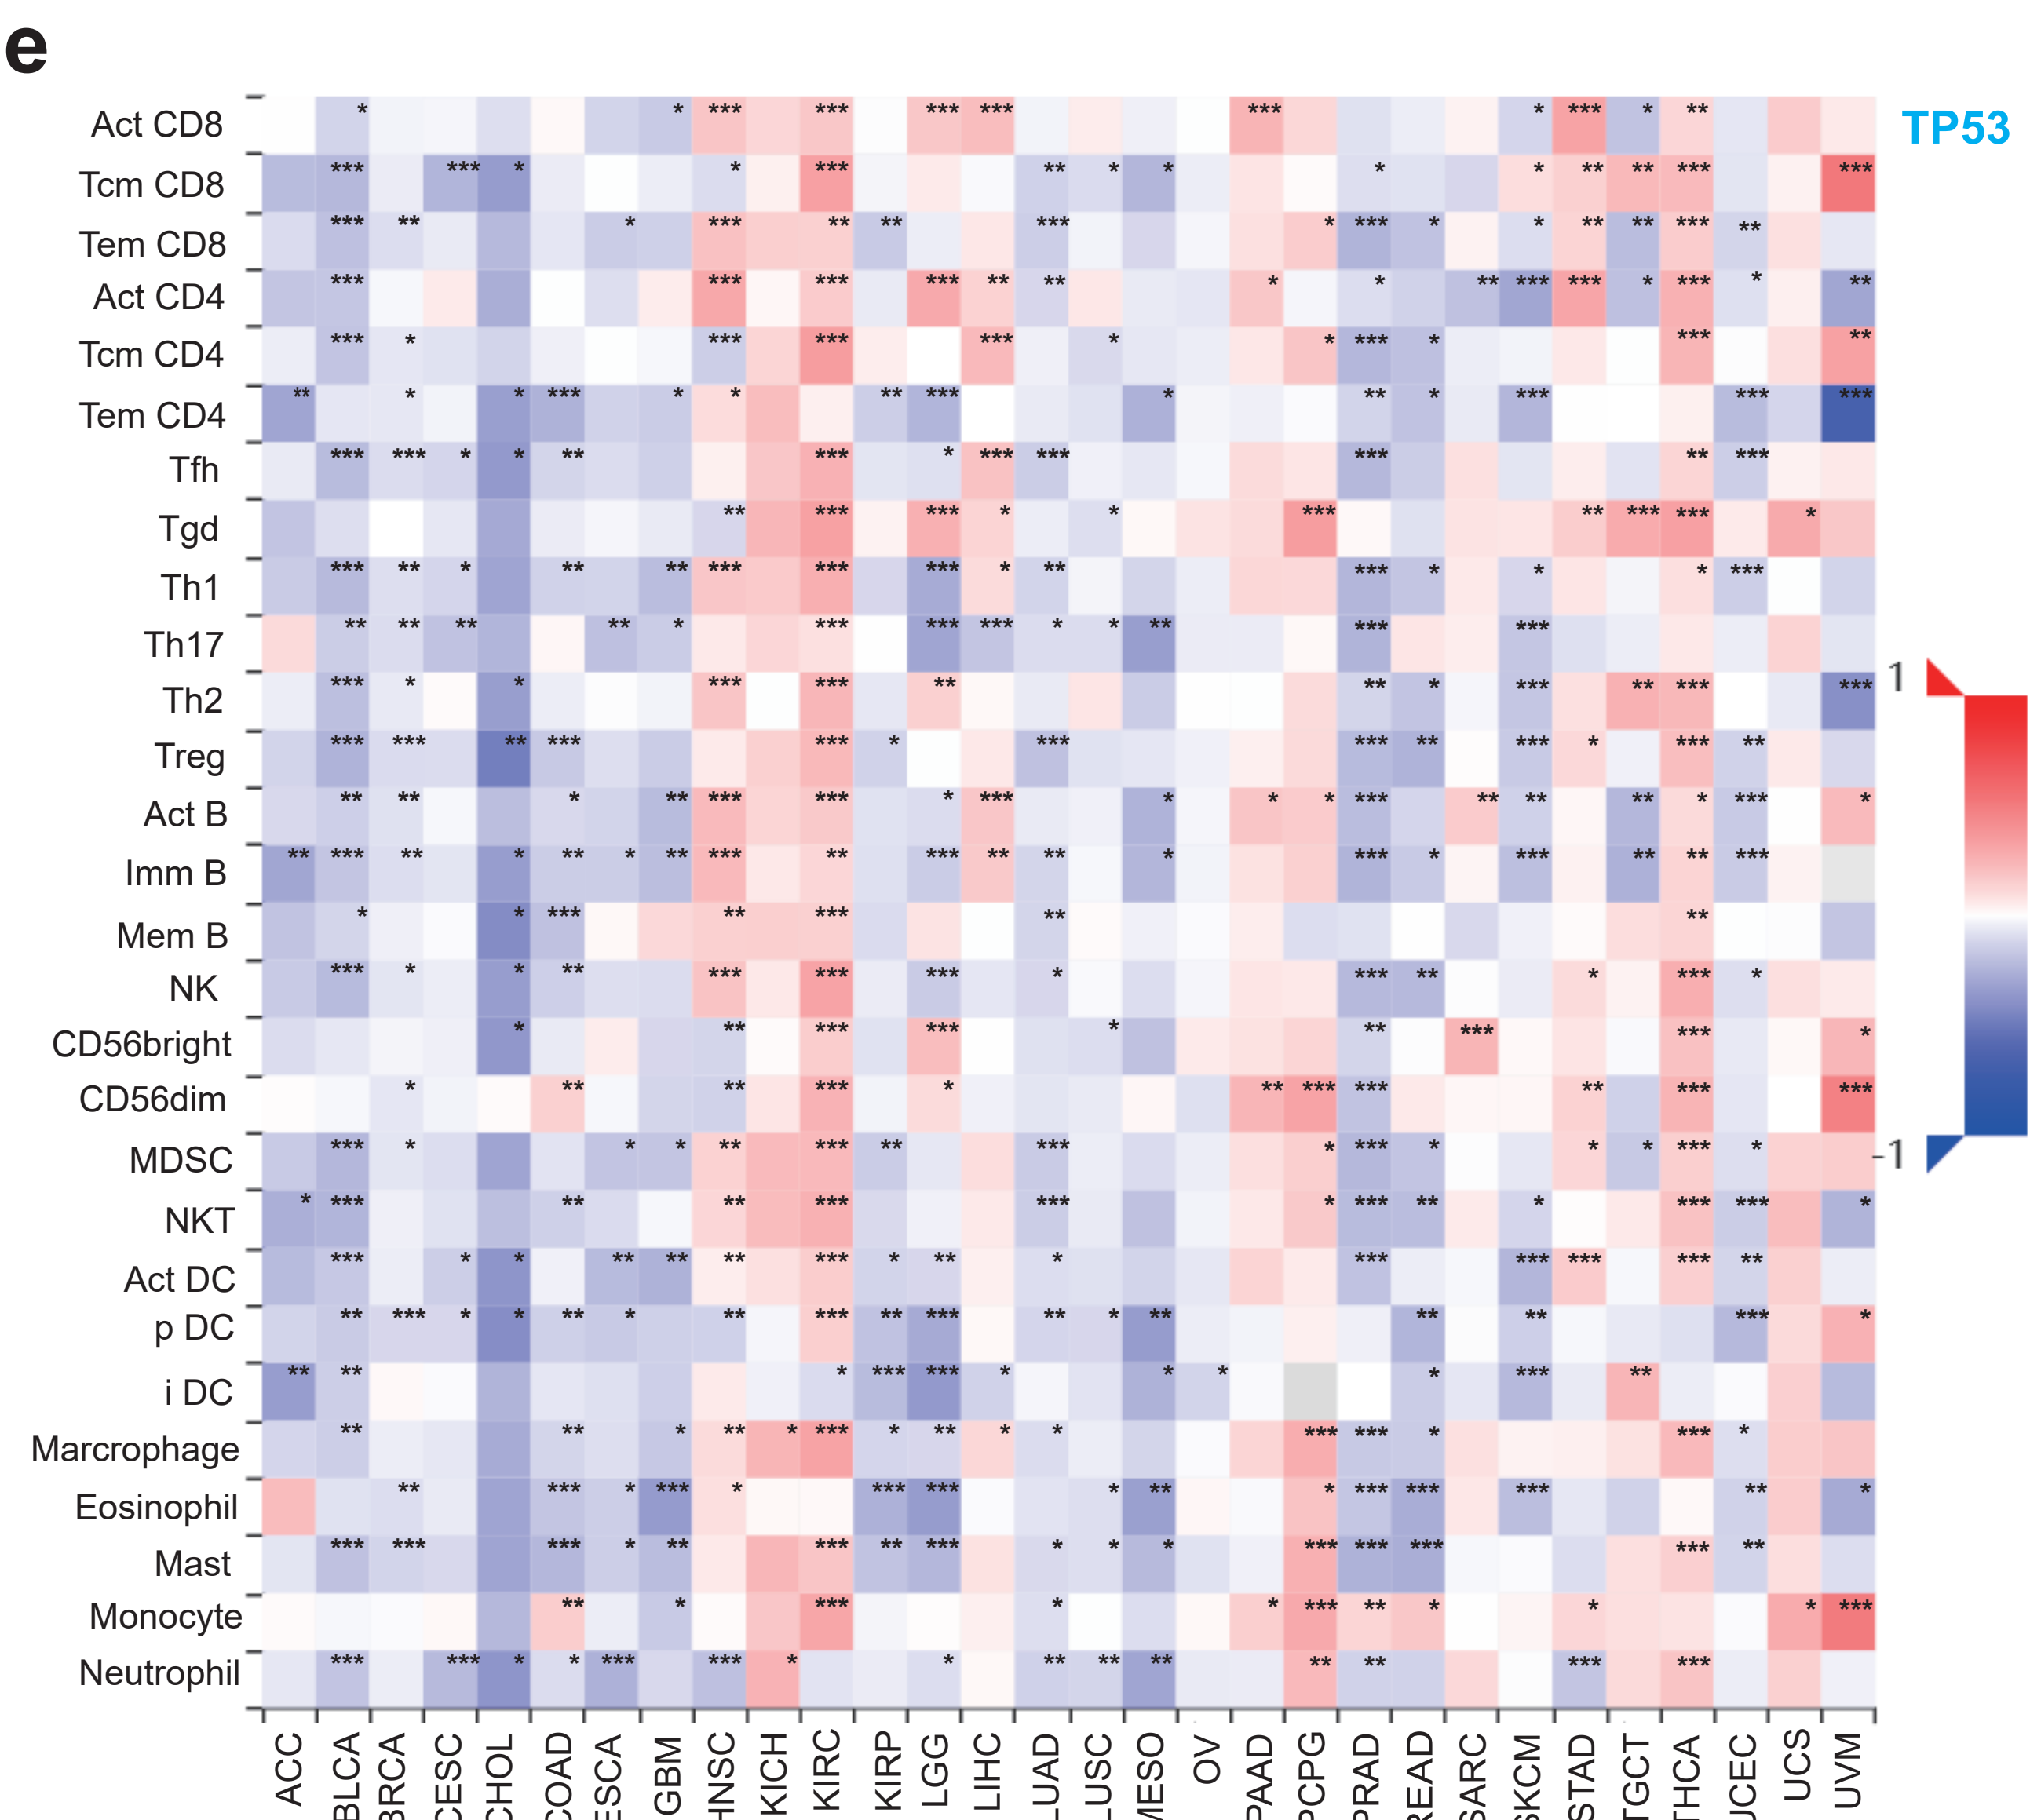

Supplement: Supplementary file 14 [file 1]

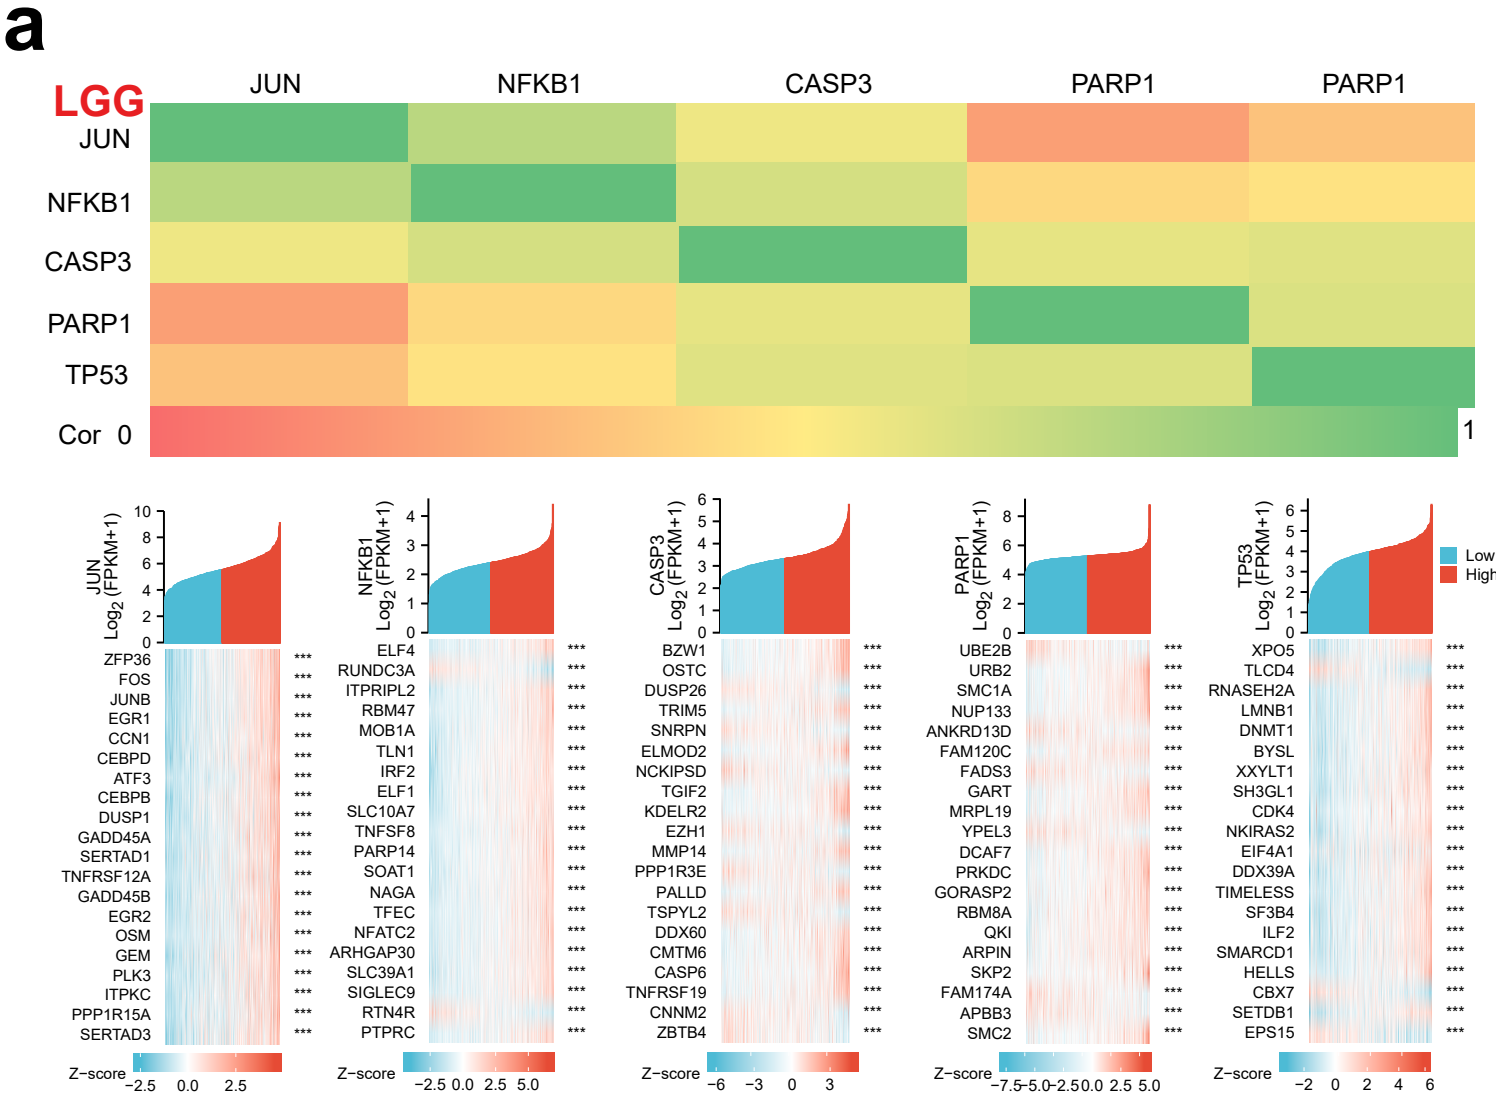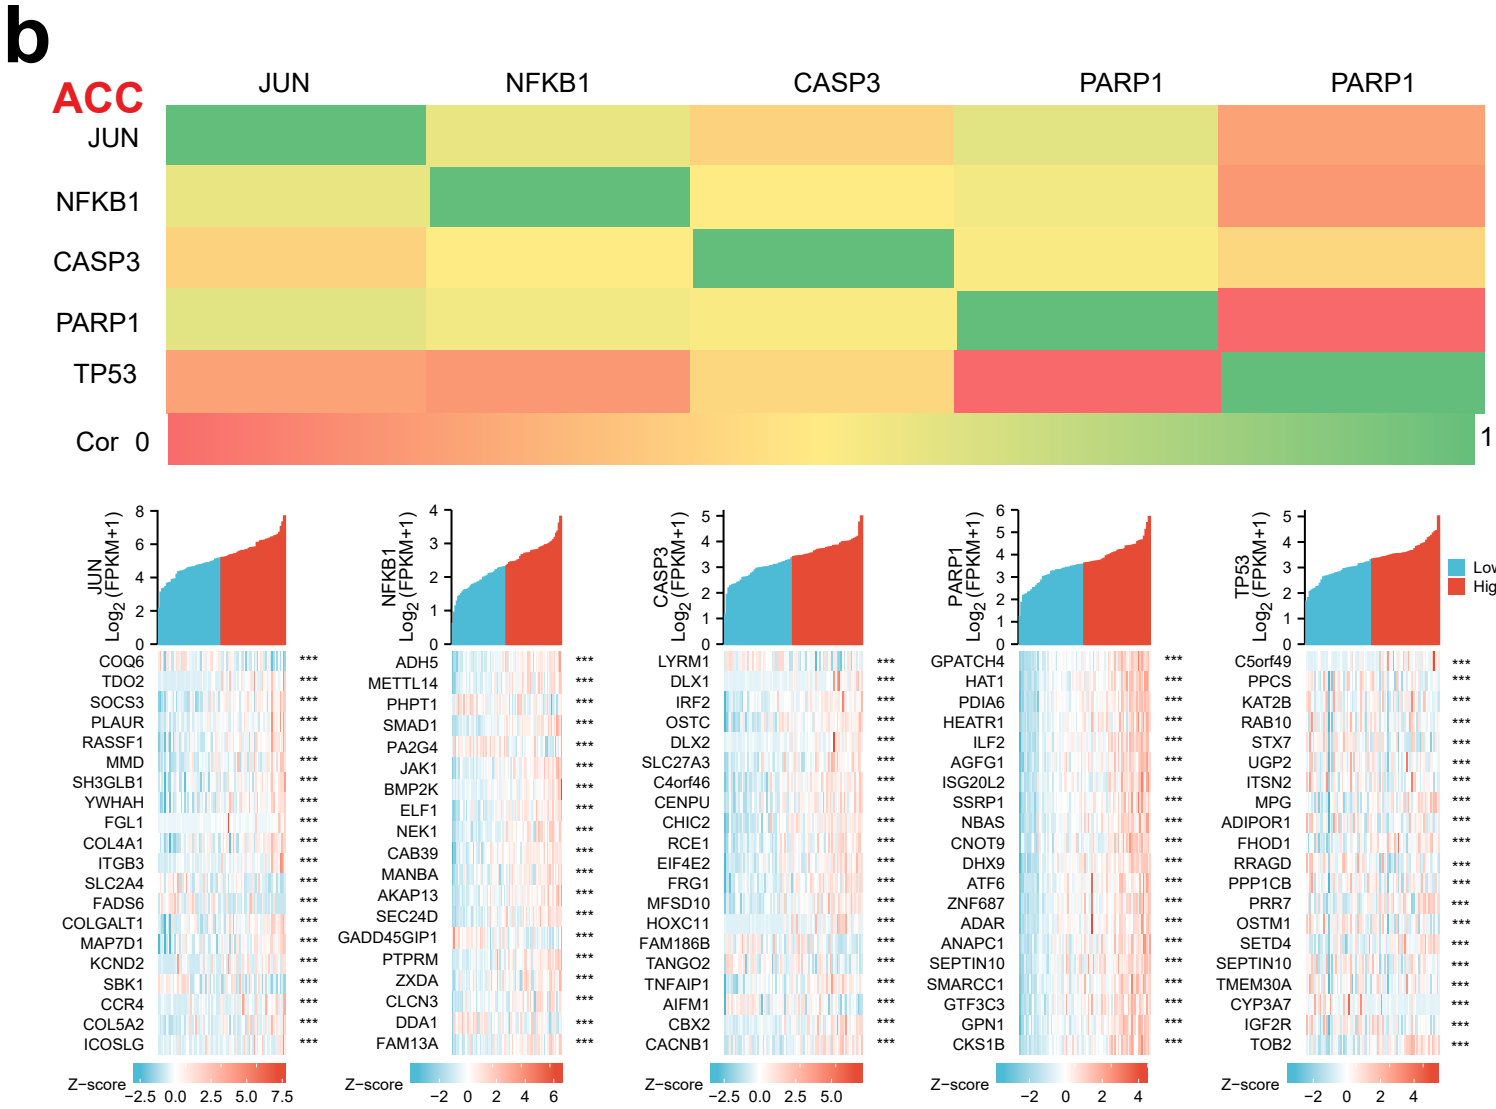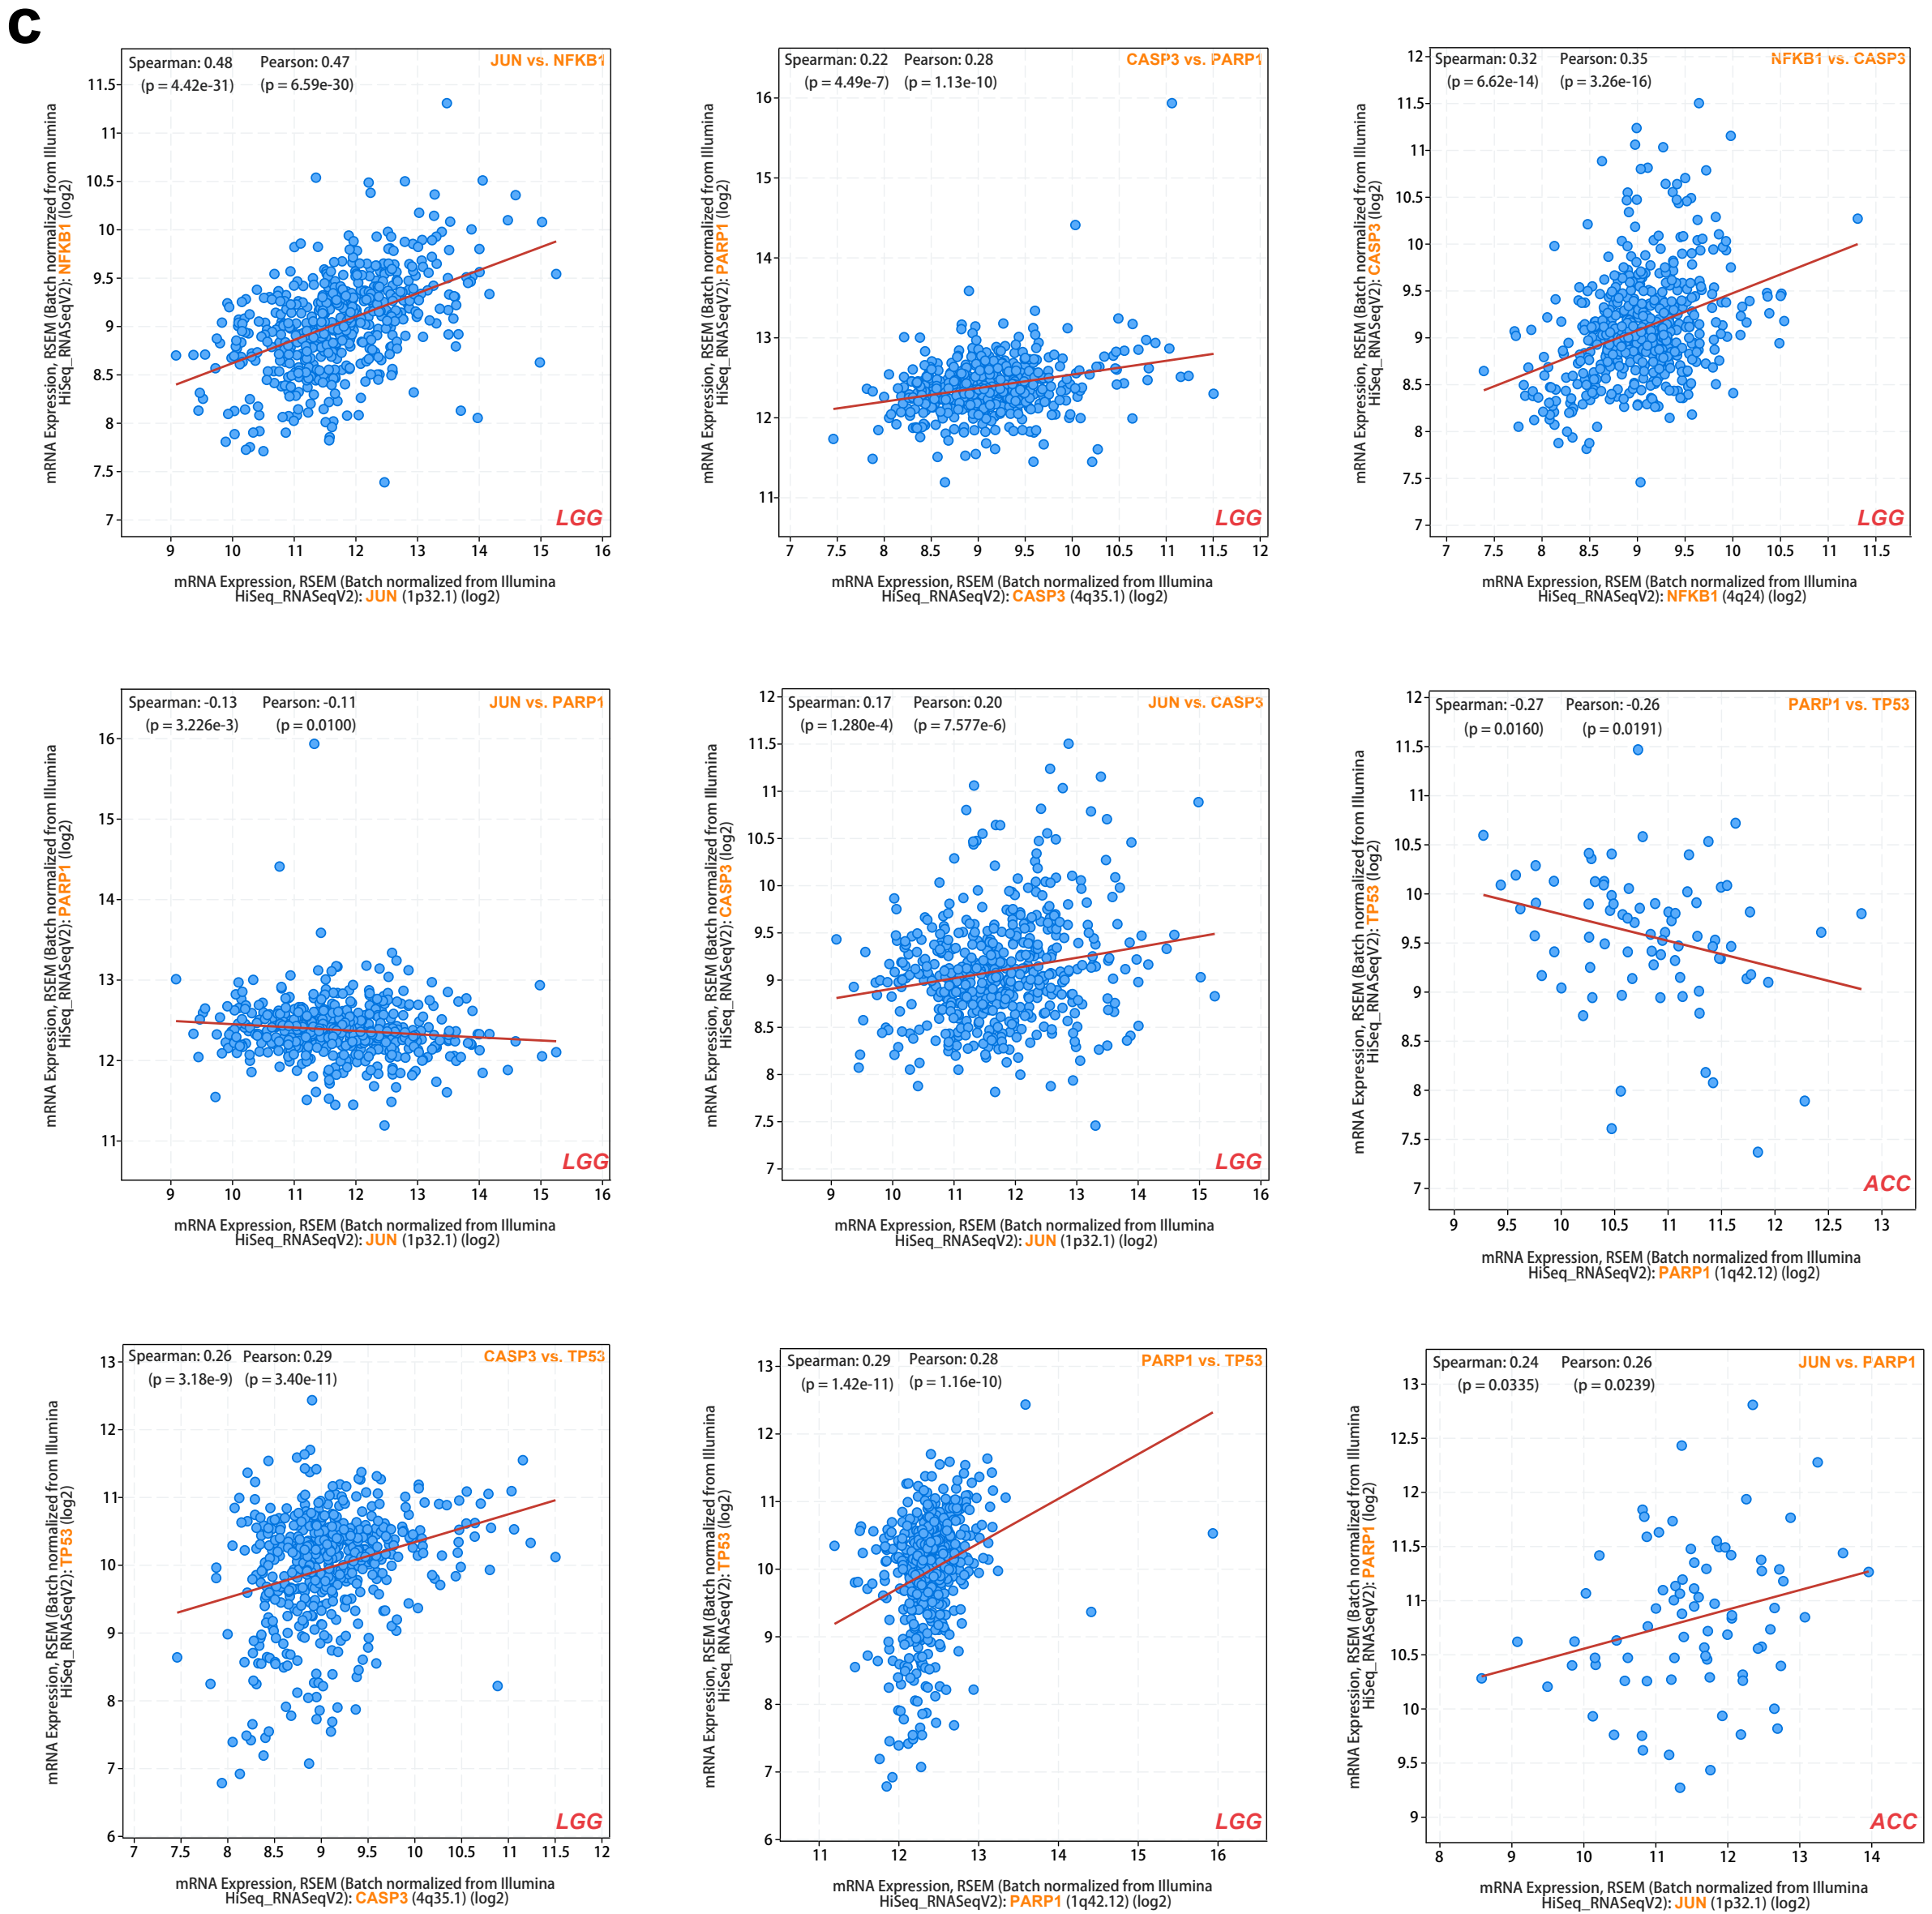

Supplement: Supplementary file 15 [file 1]

a

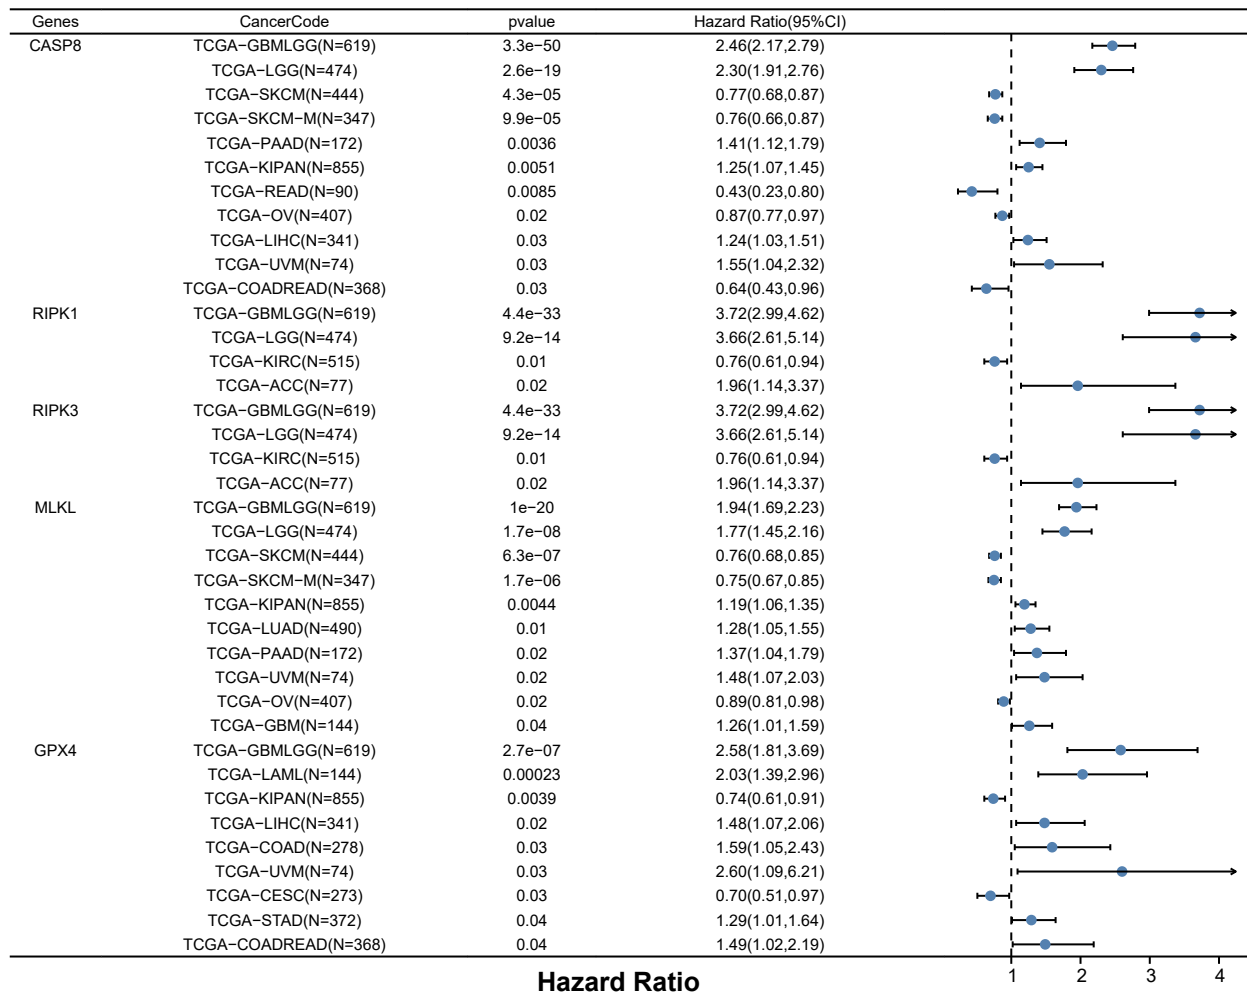

c

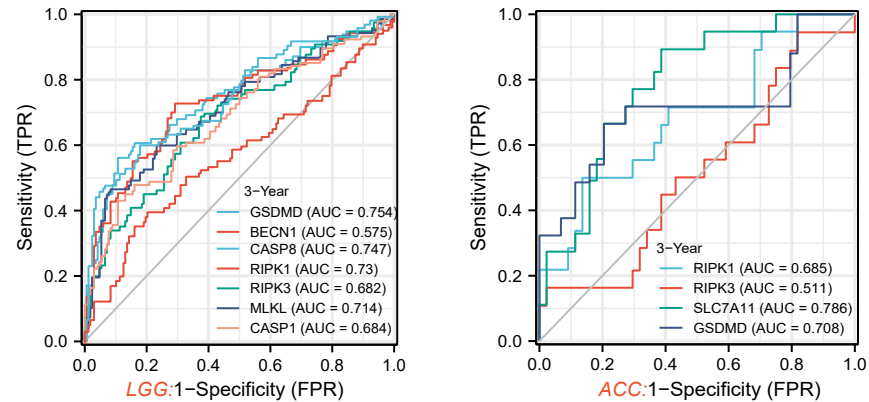

d

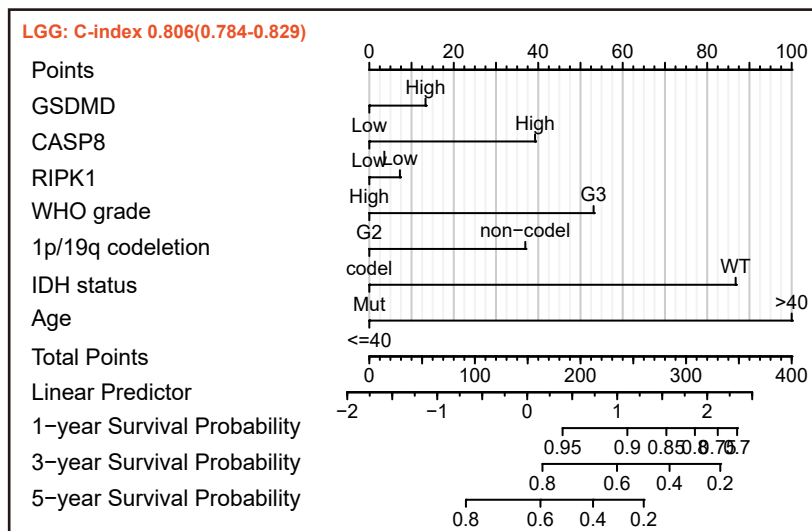

b

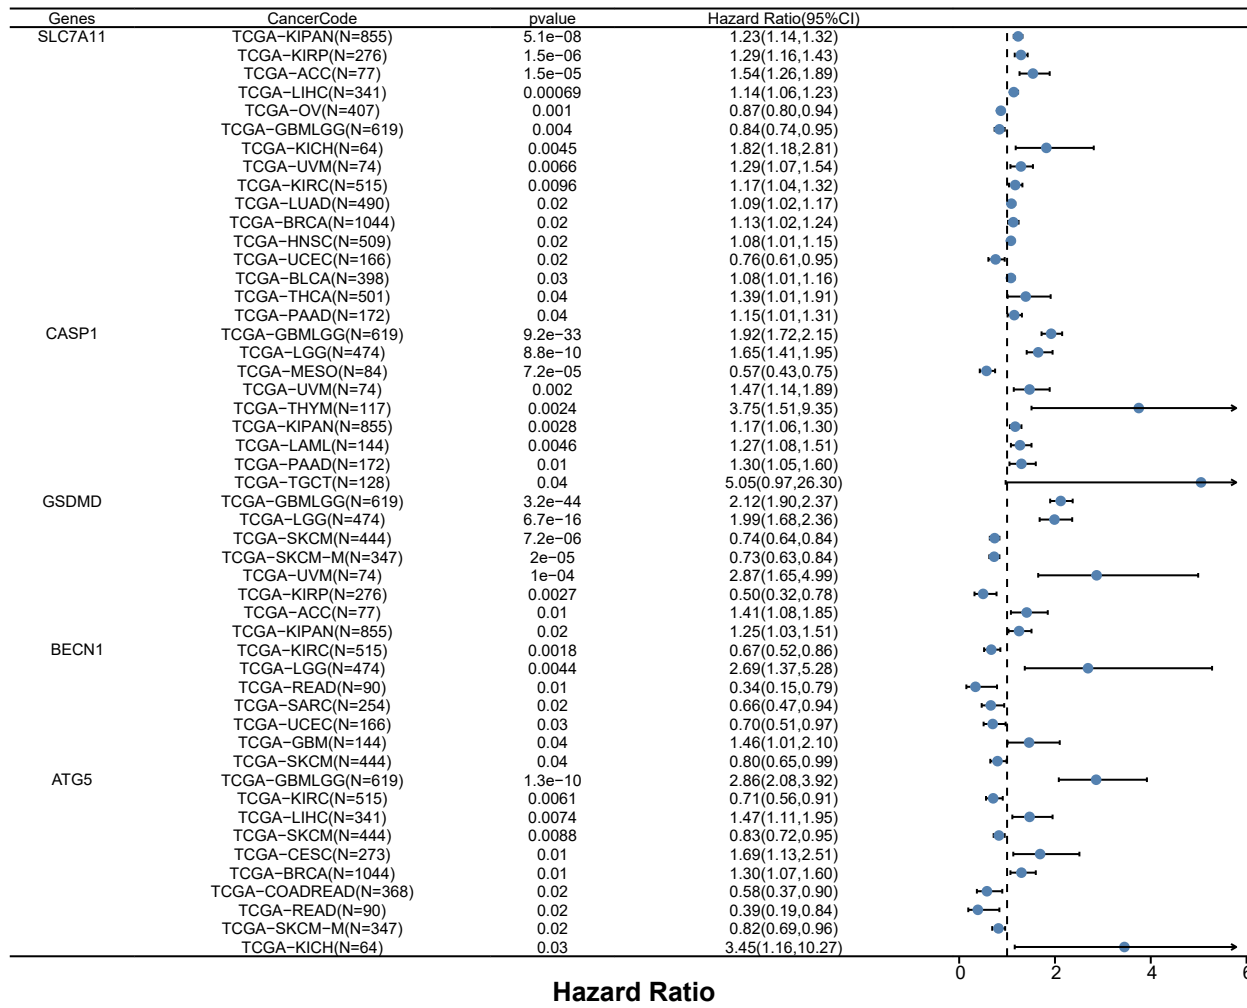

e

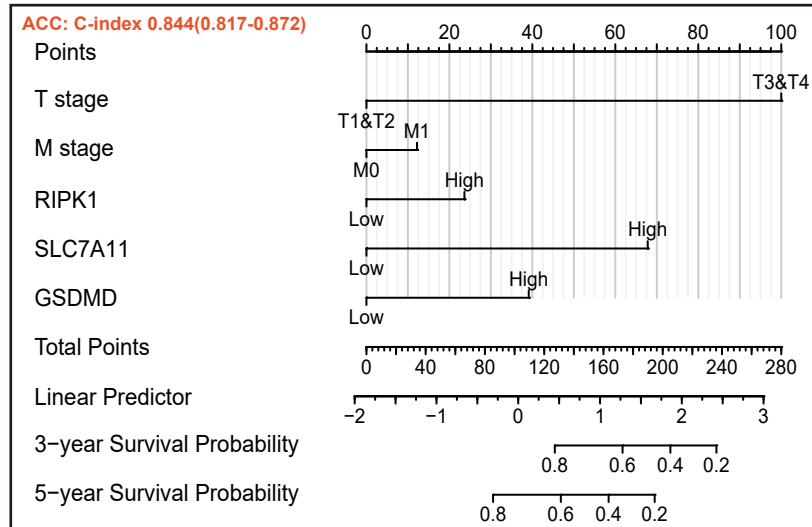

f

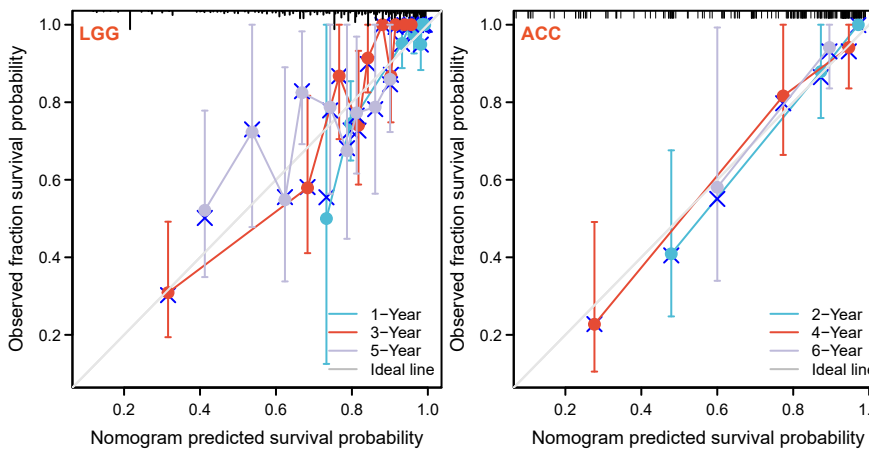

Supplement: Supplementary file 17 [file 1]

**a**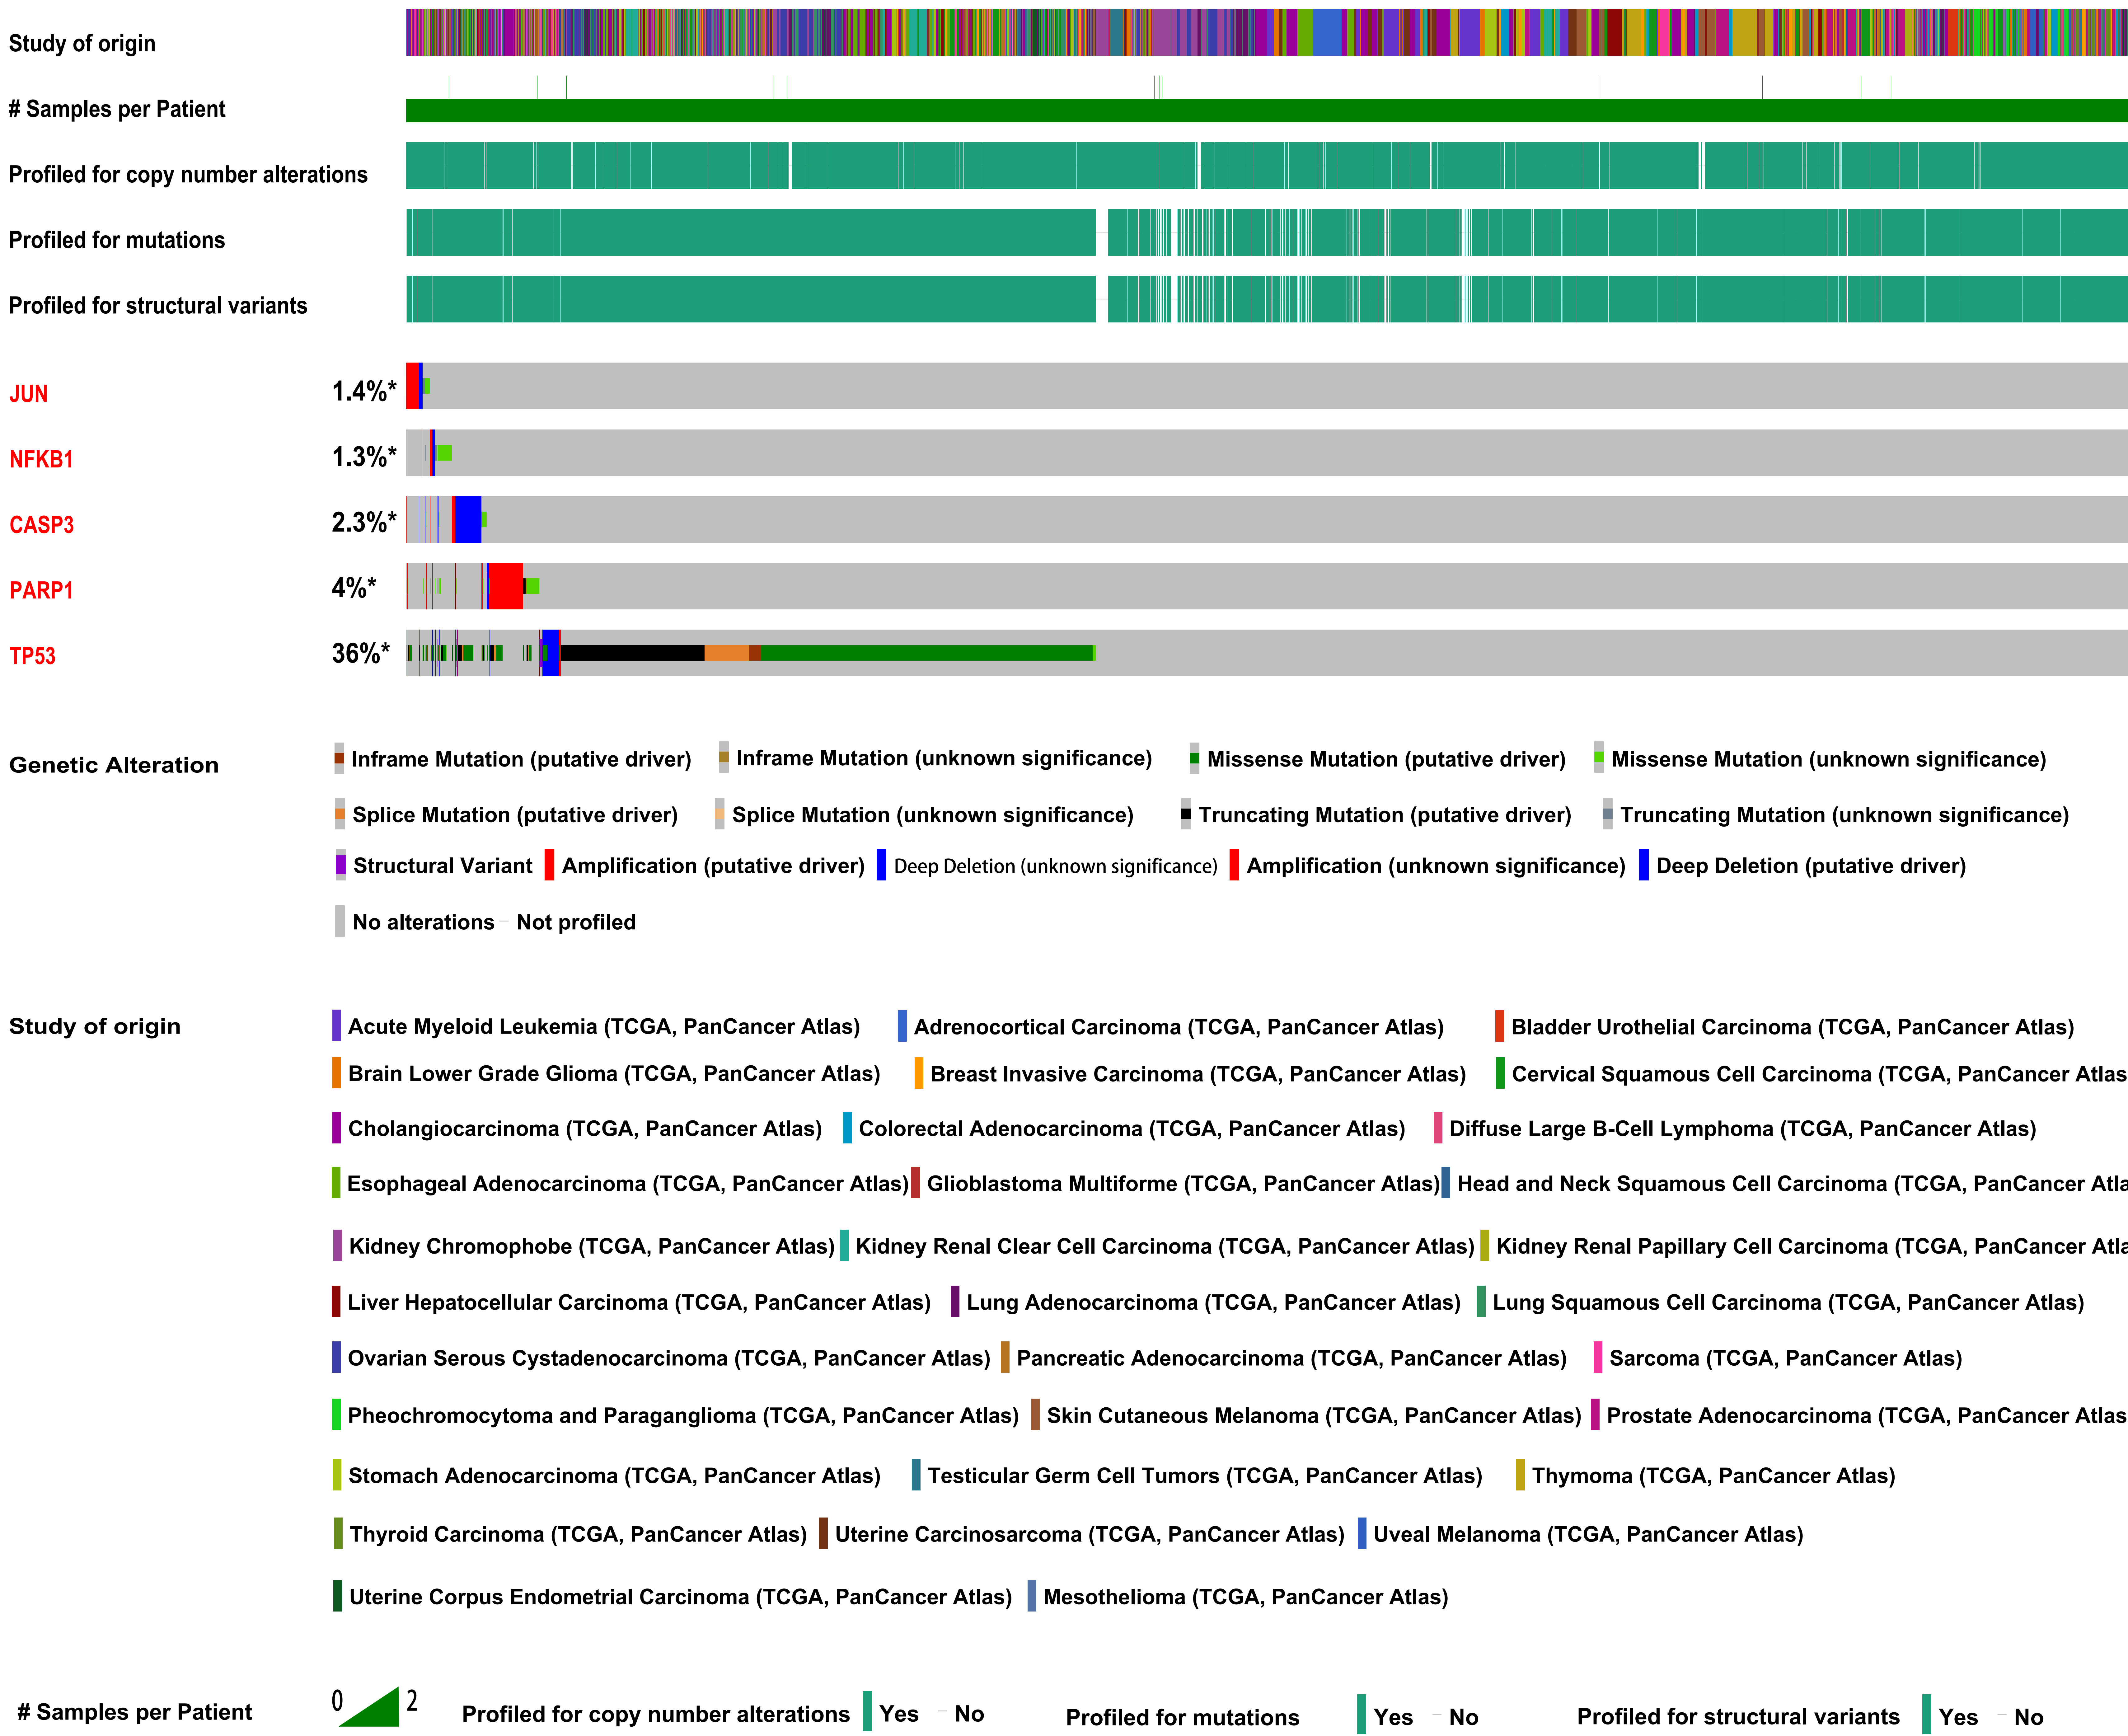**b**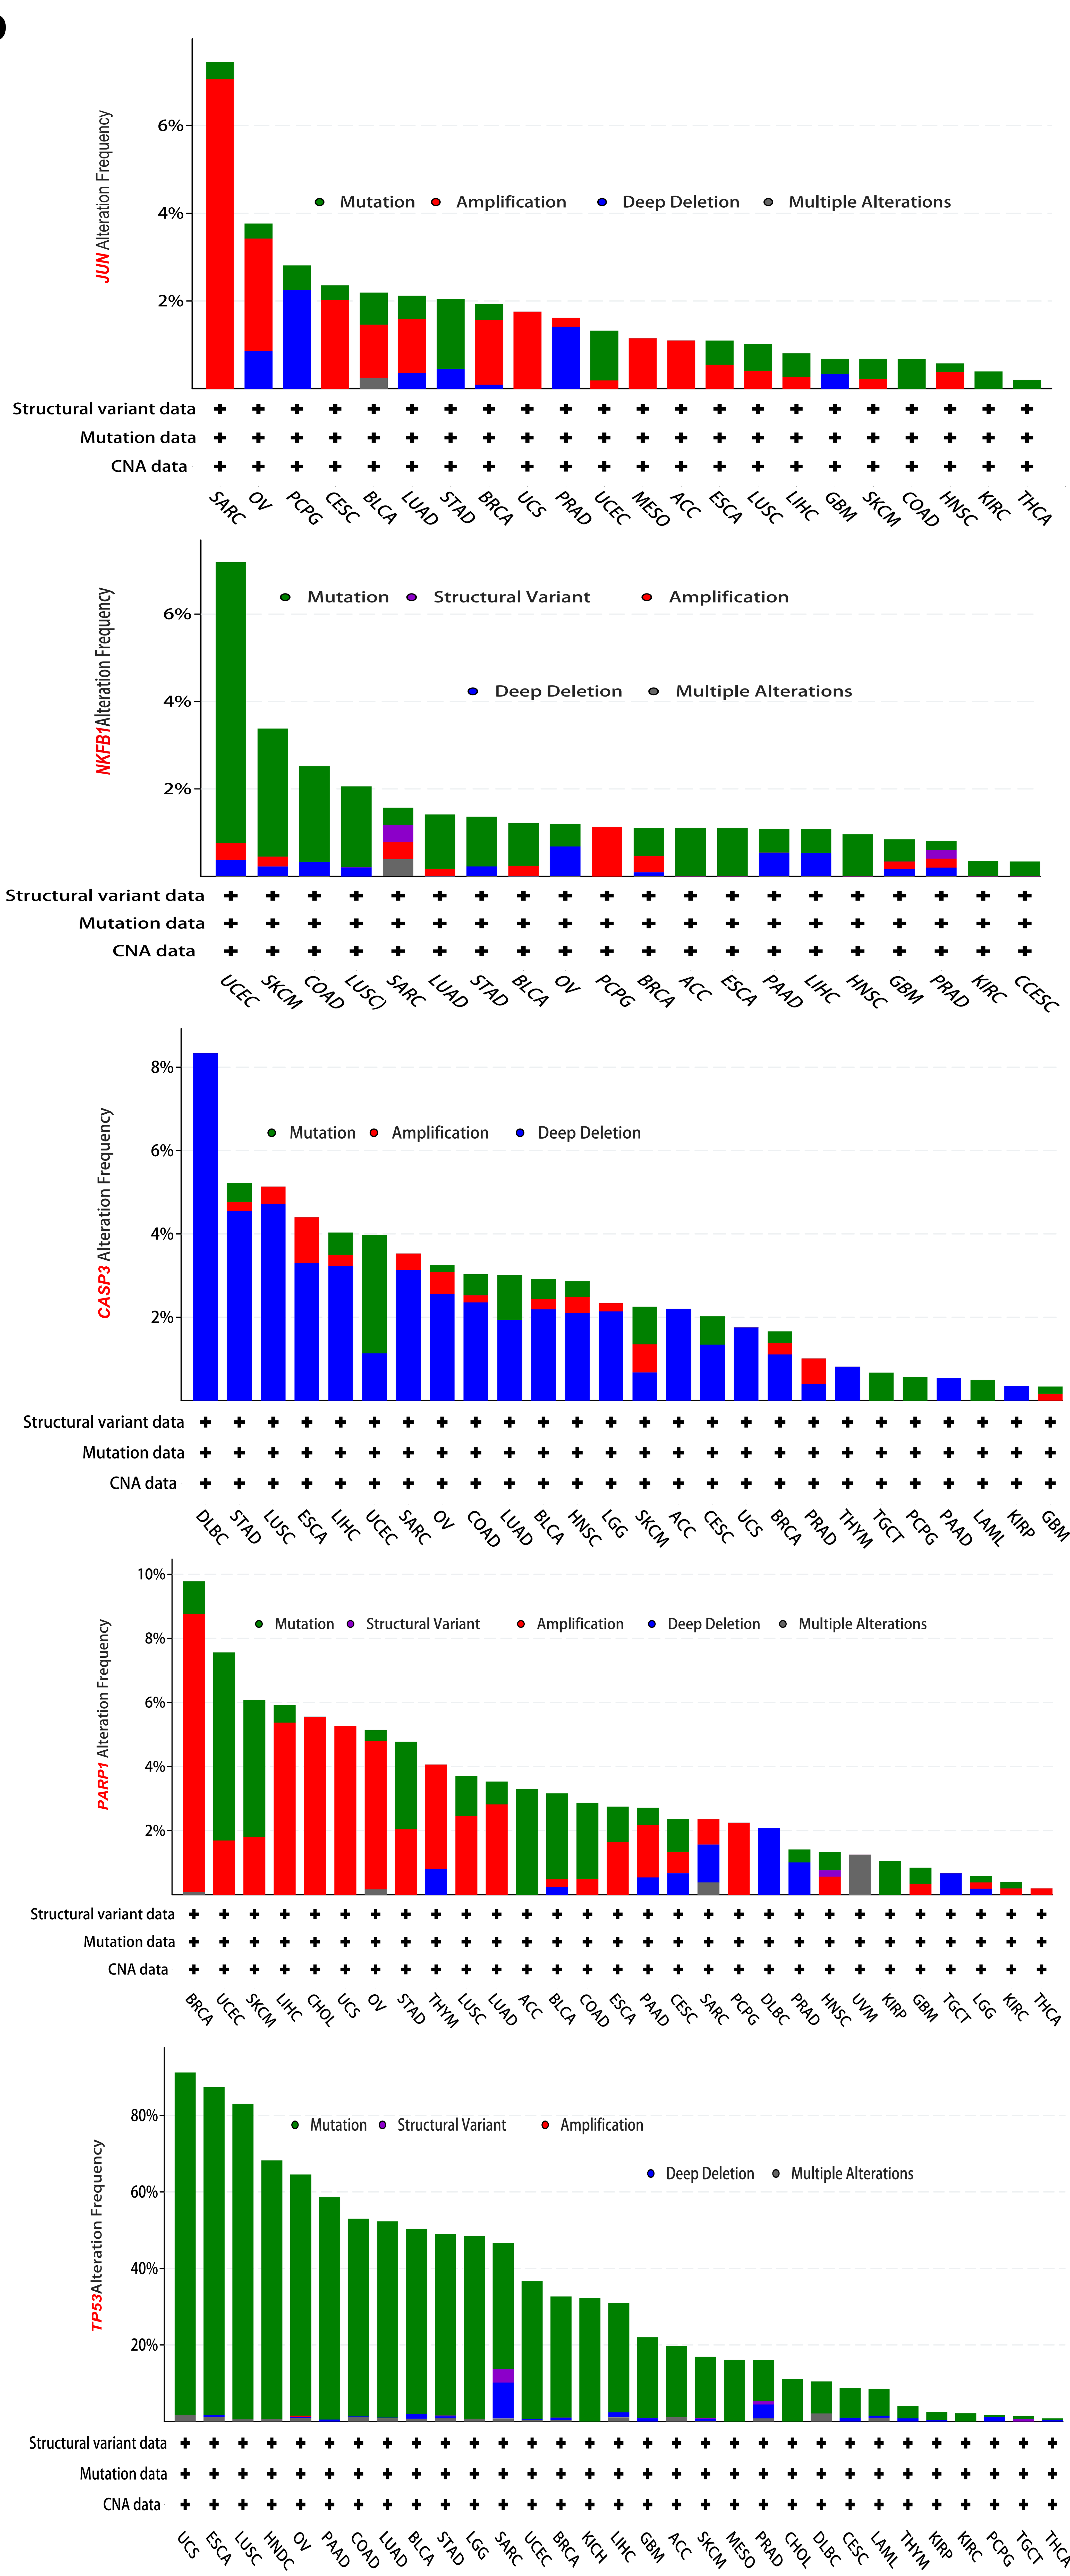

Supplement: Supplementary file 18 [file 1]

**a**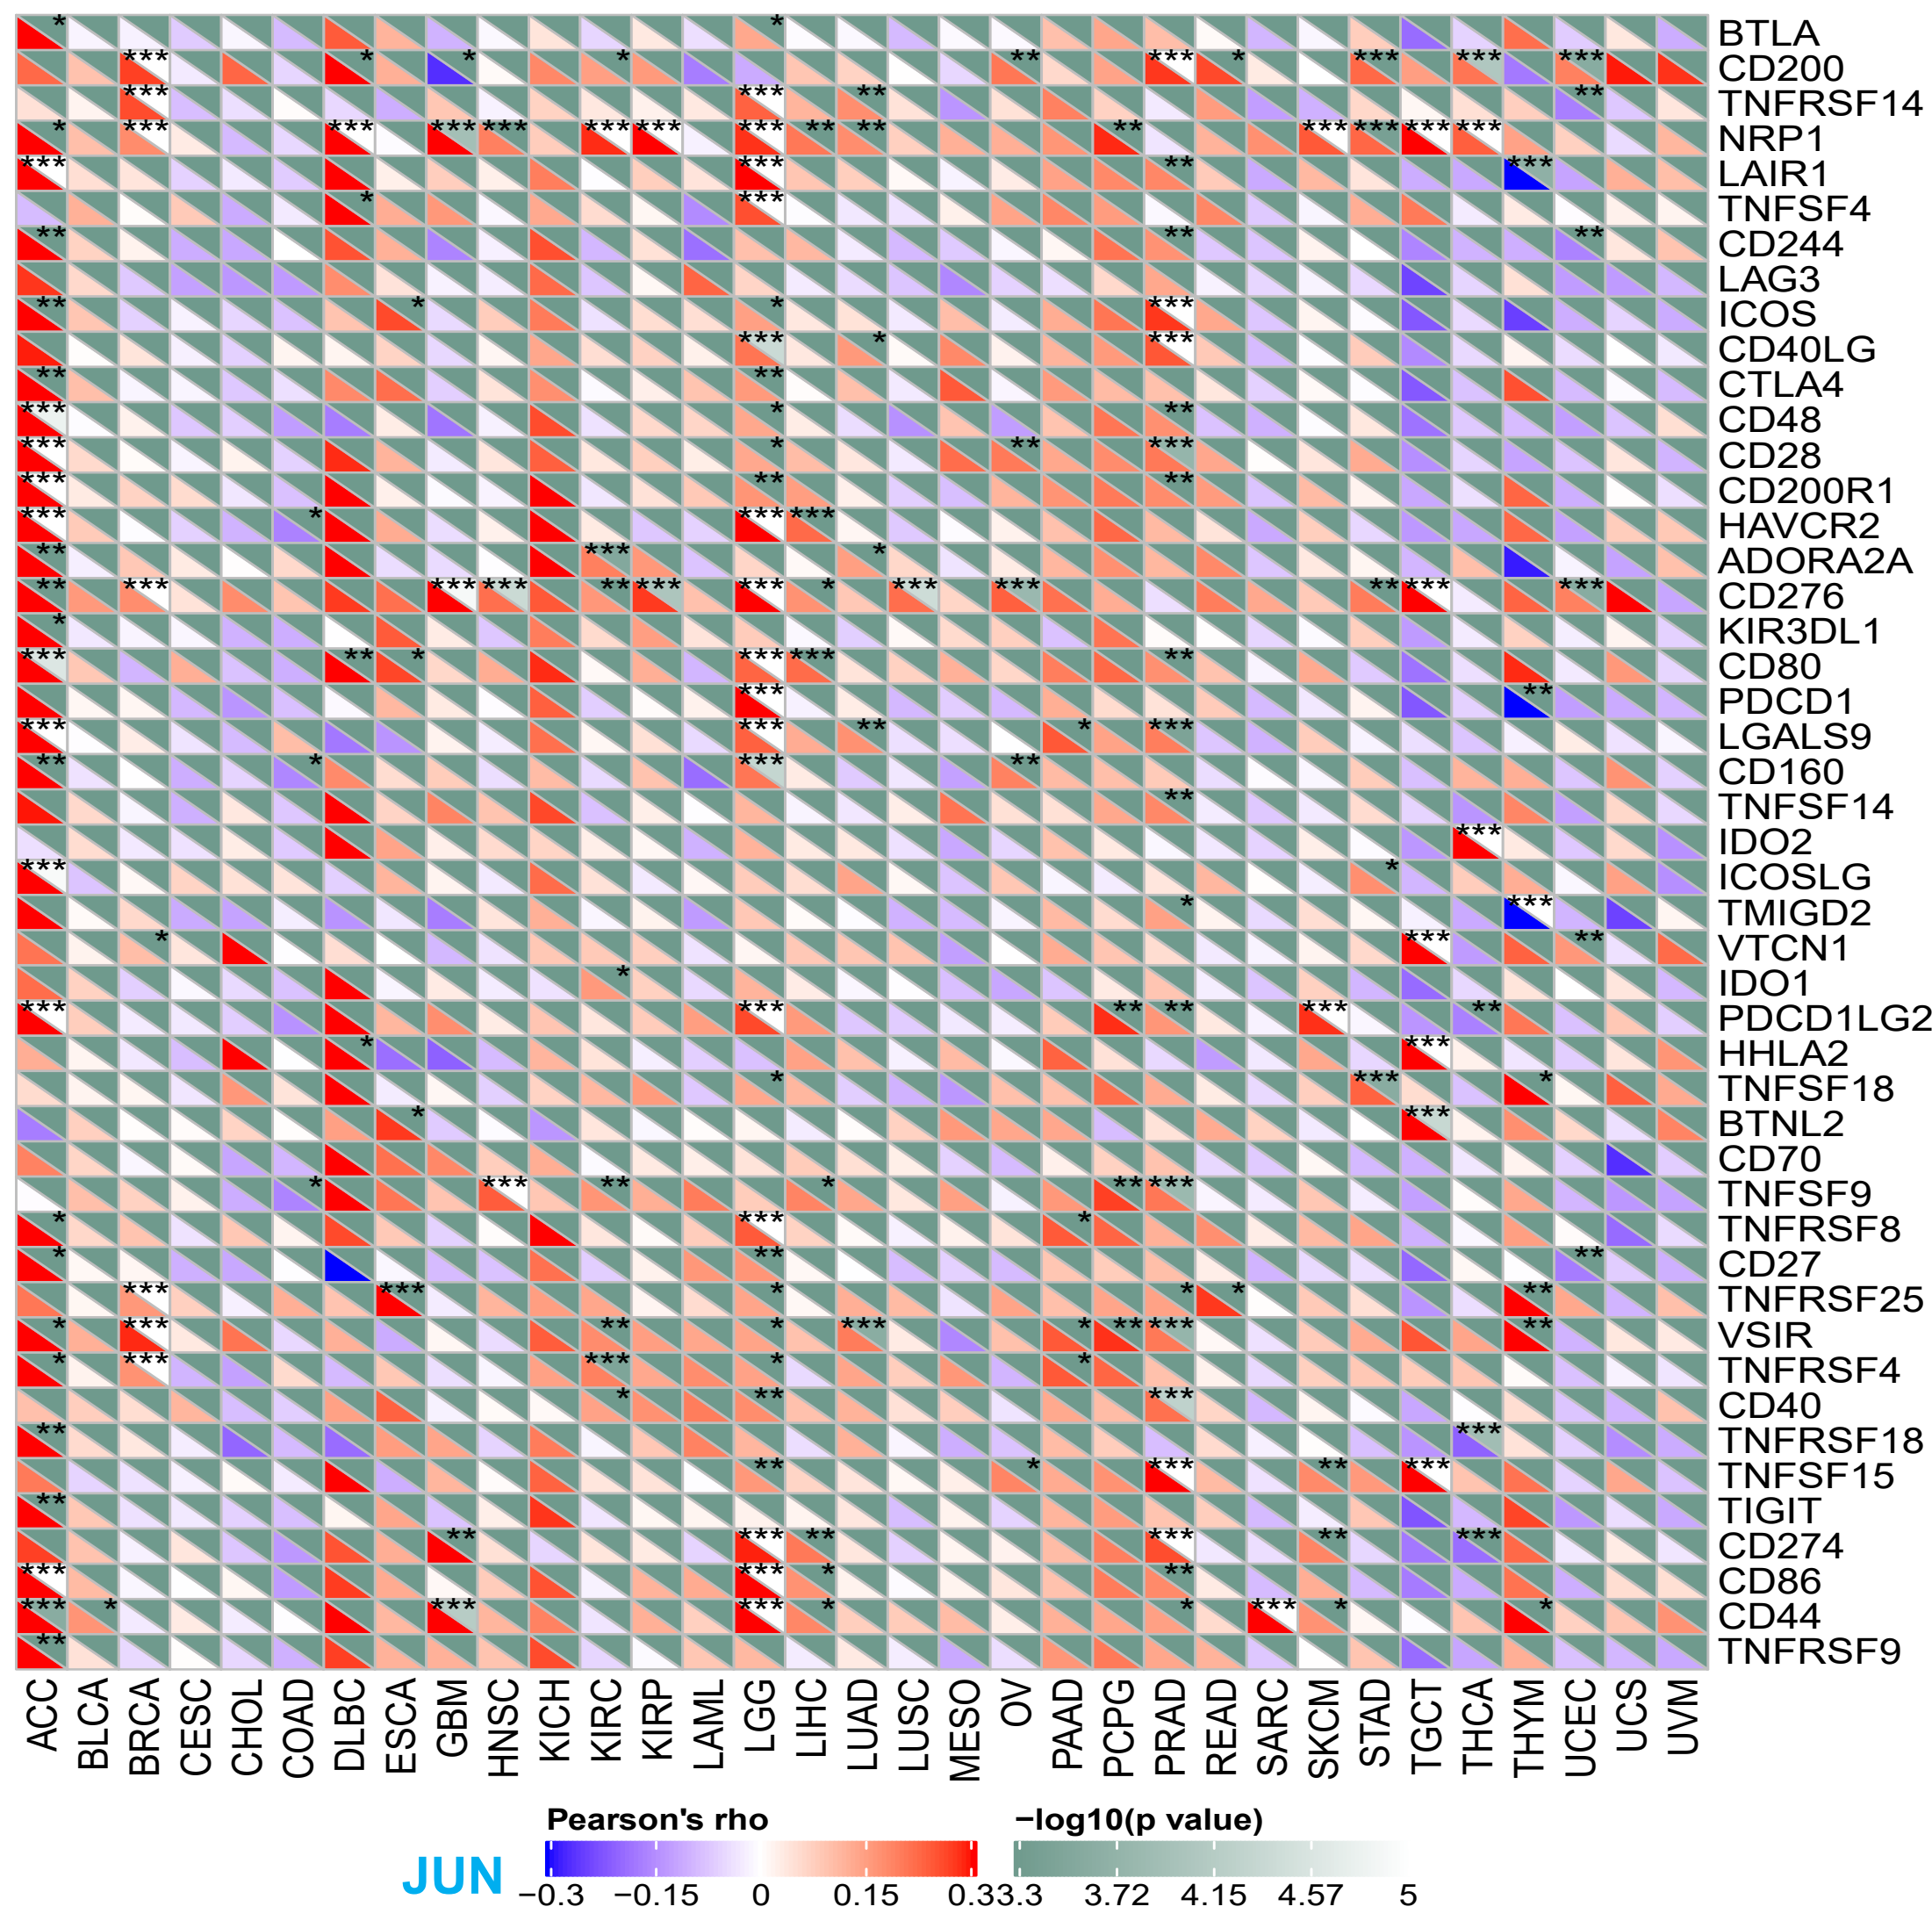**b**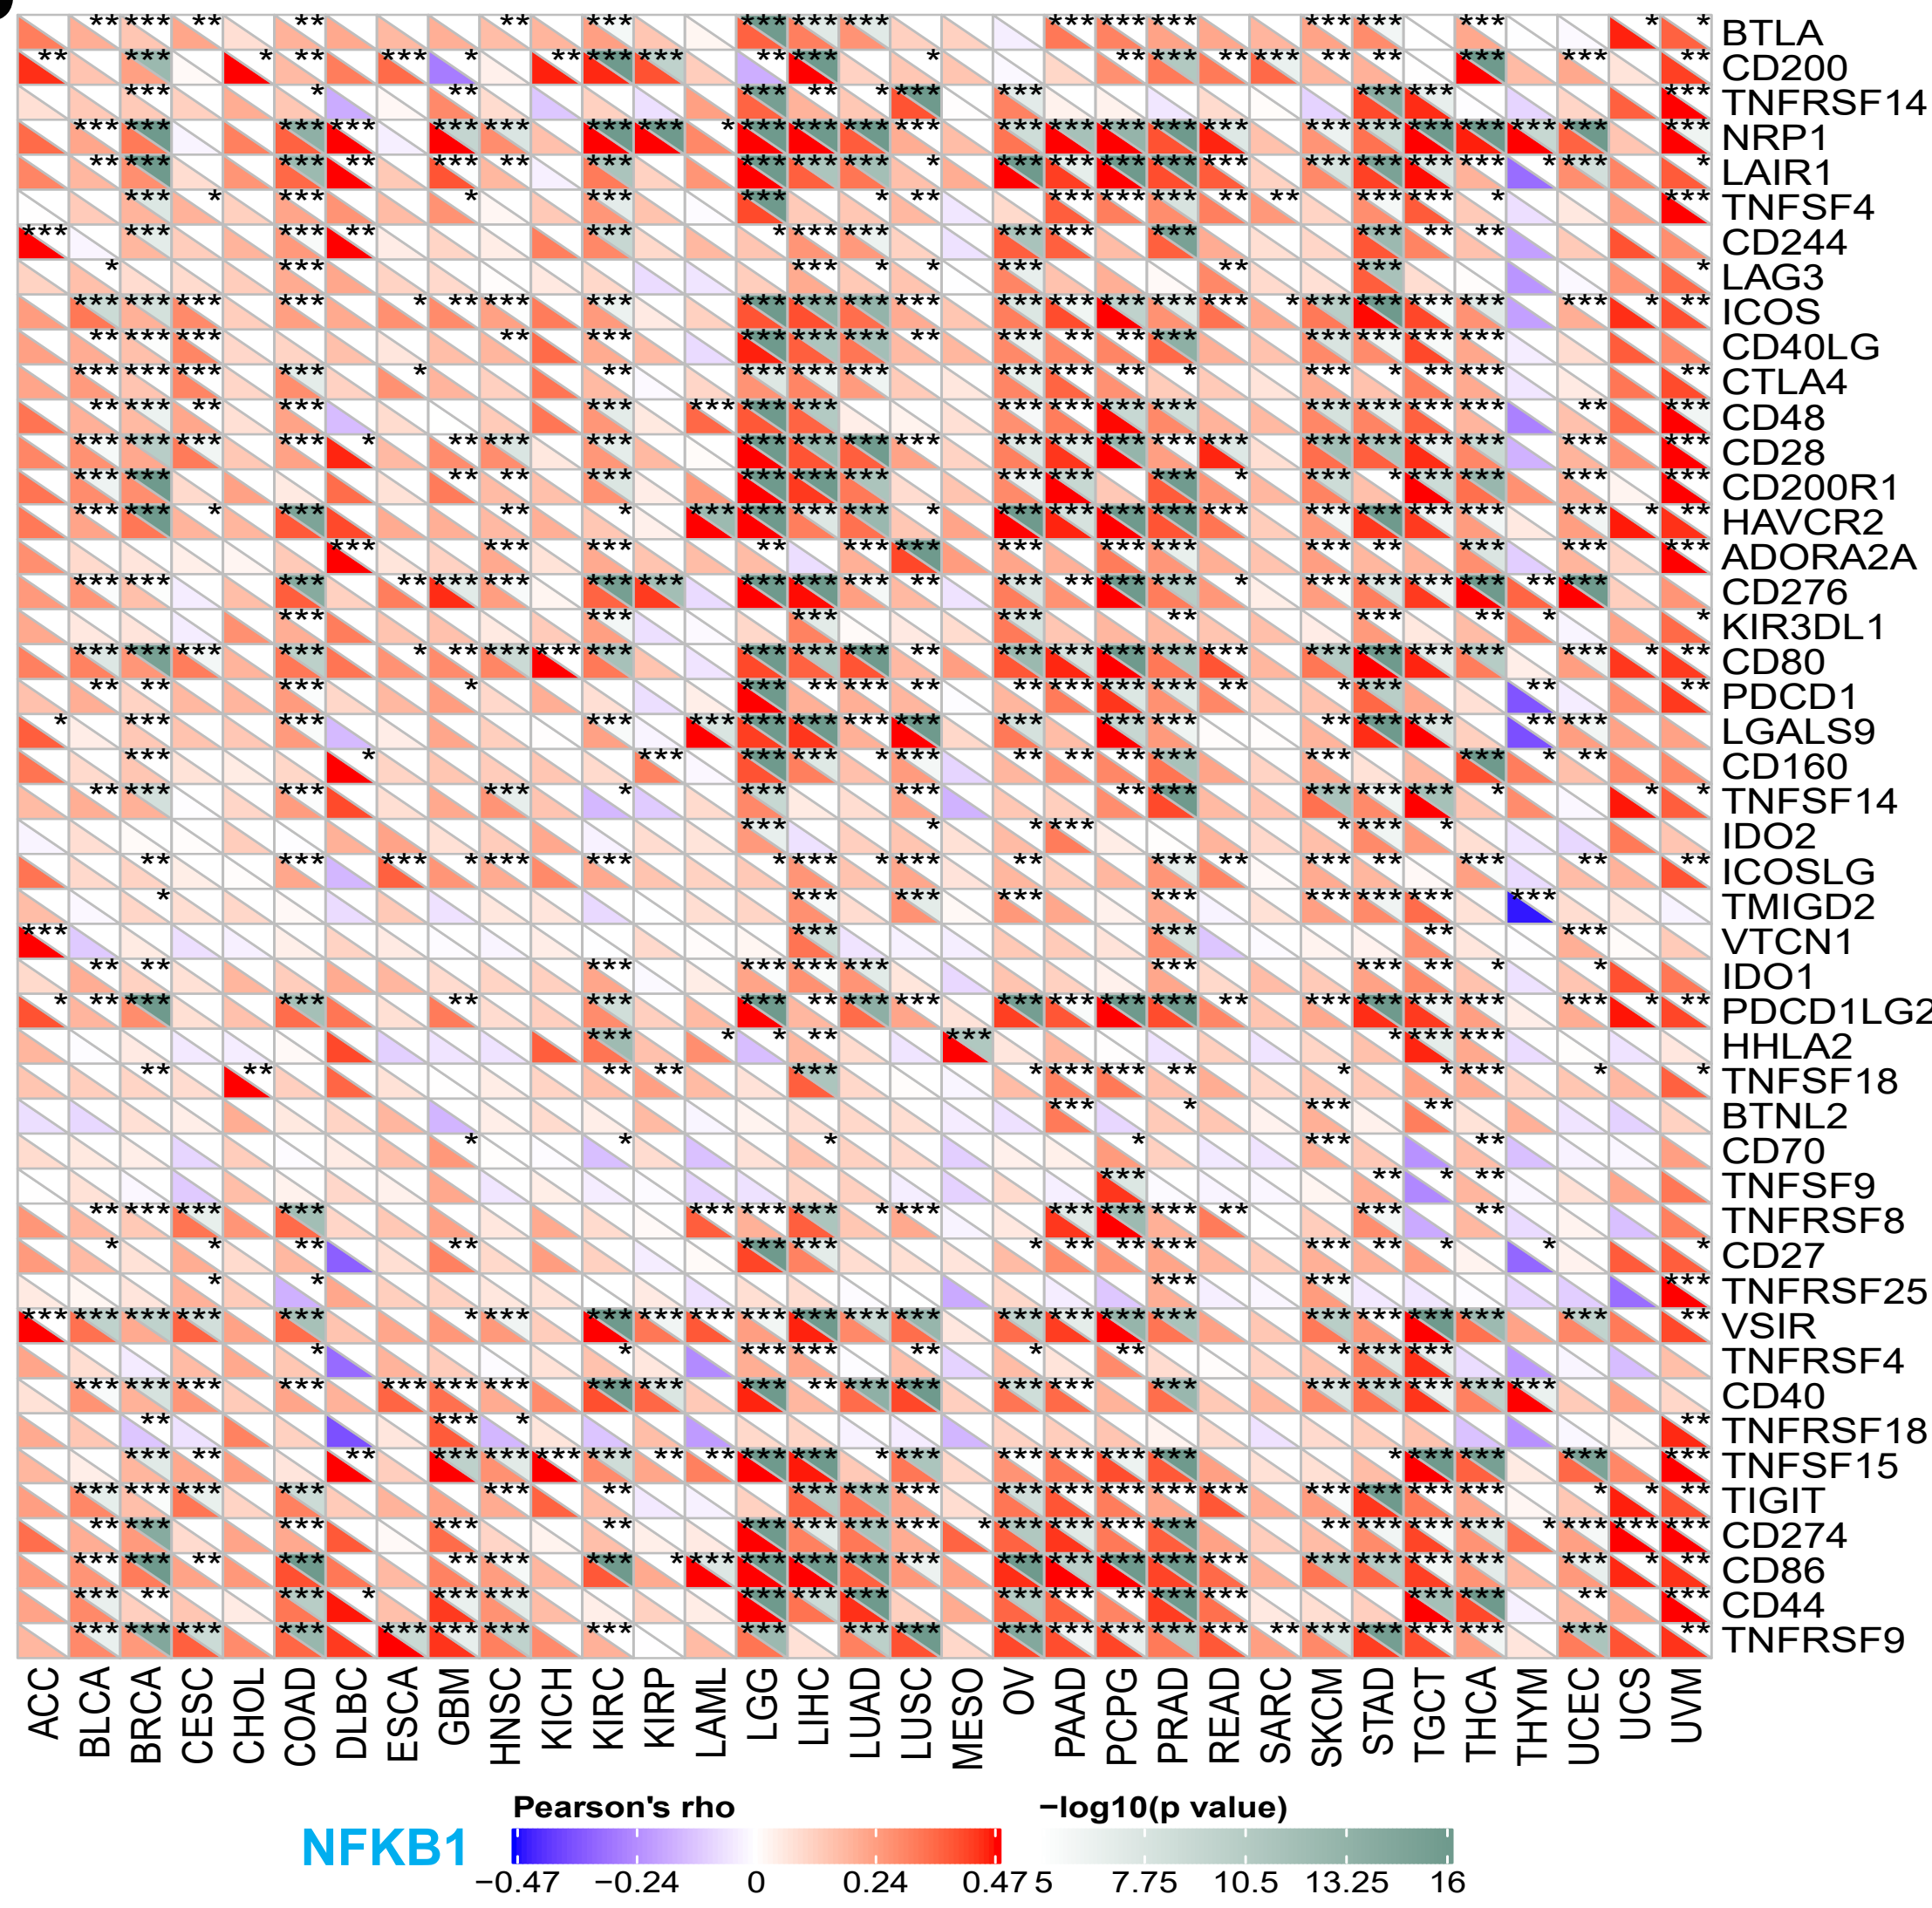**c**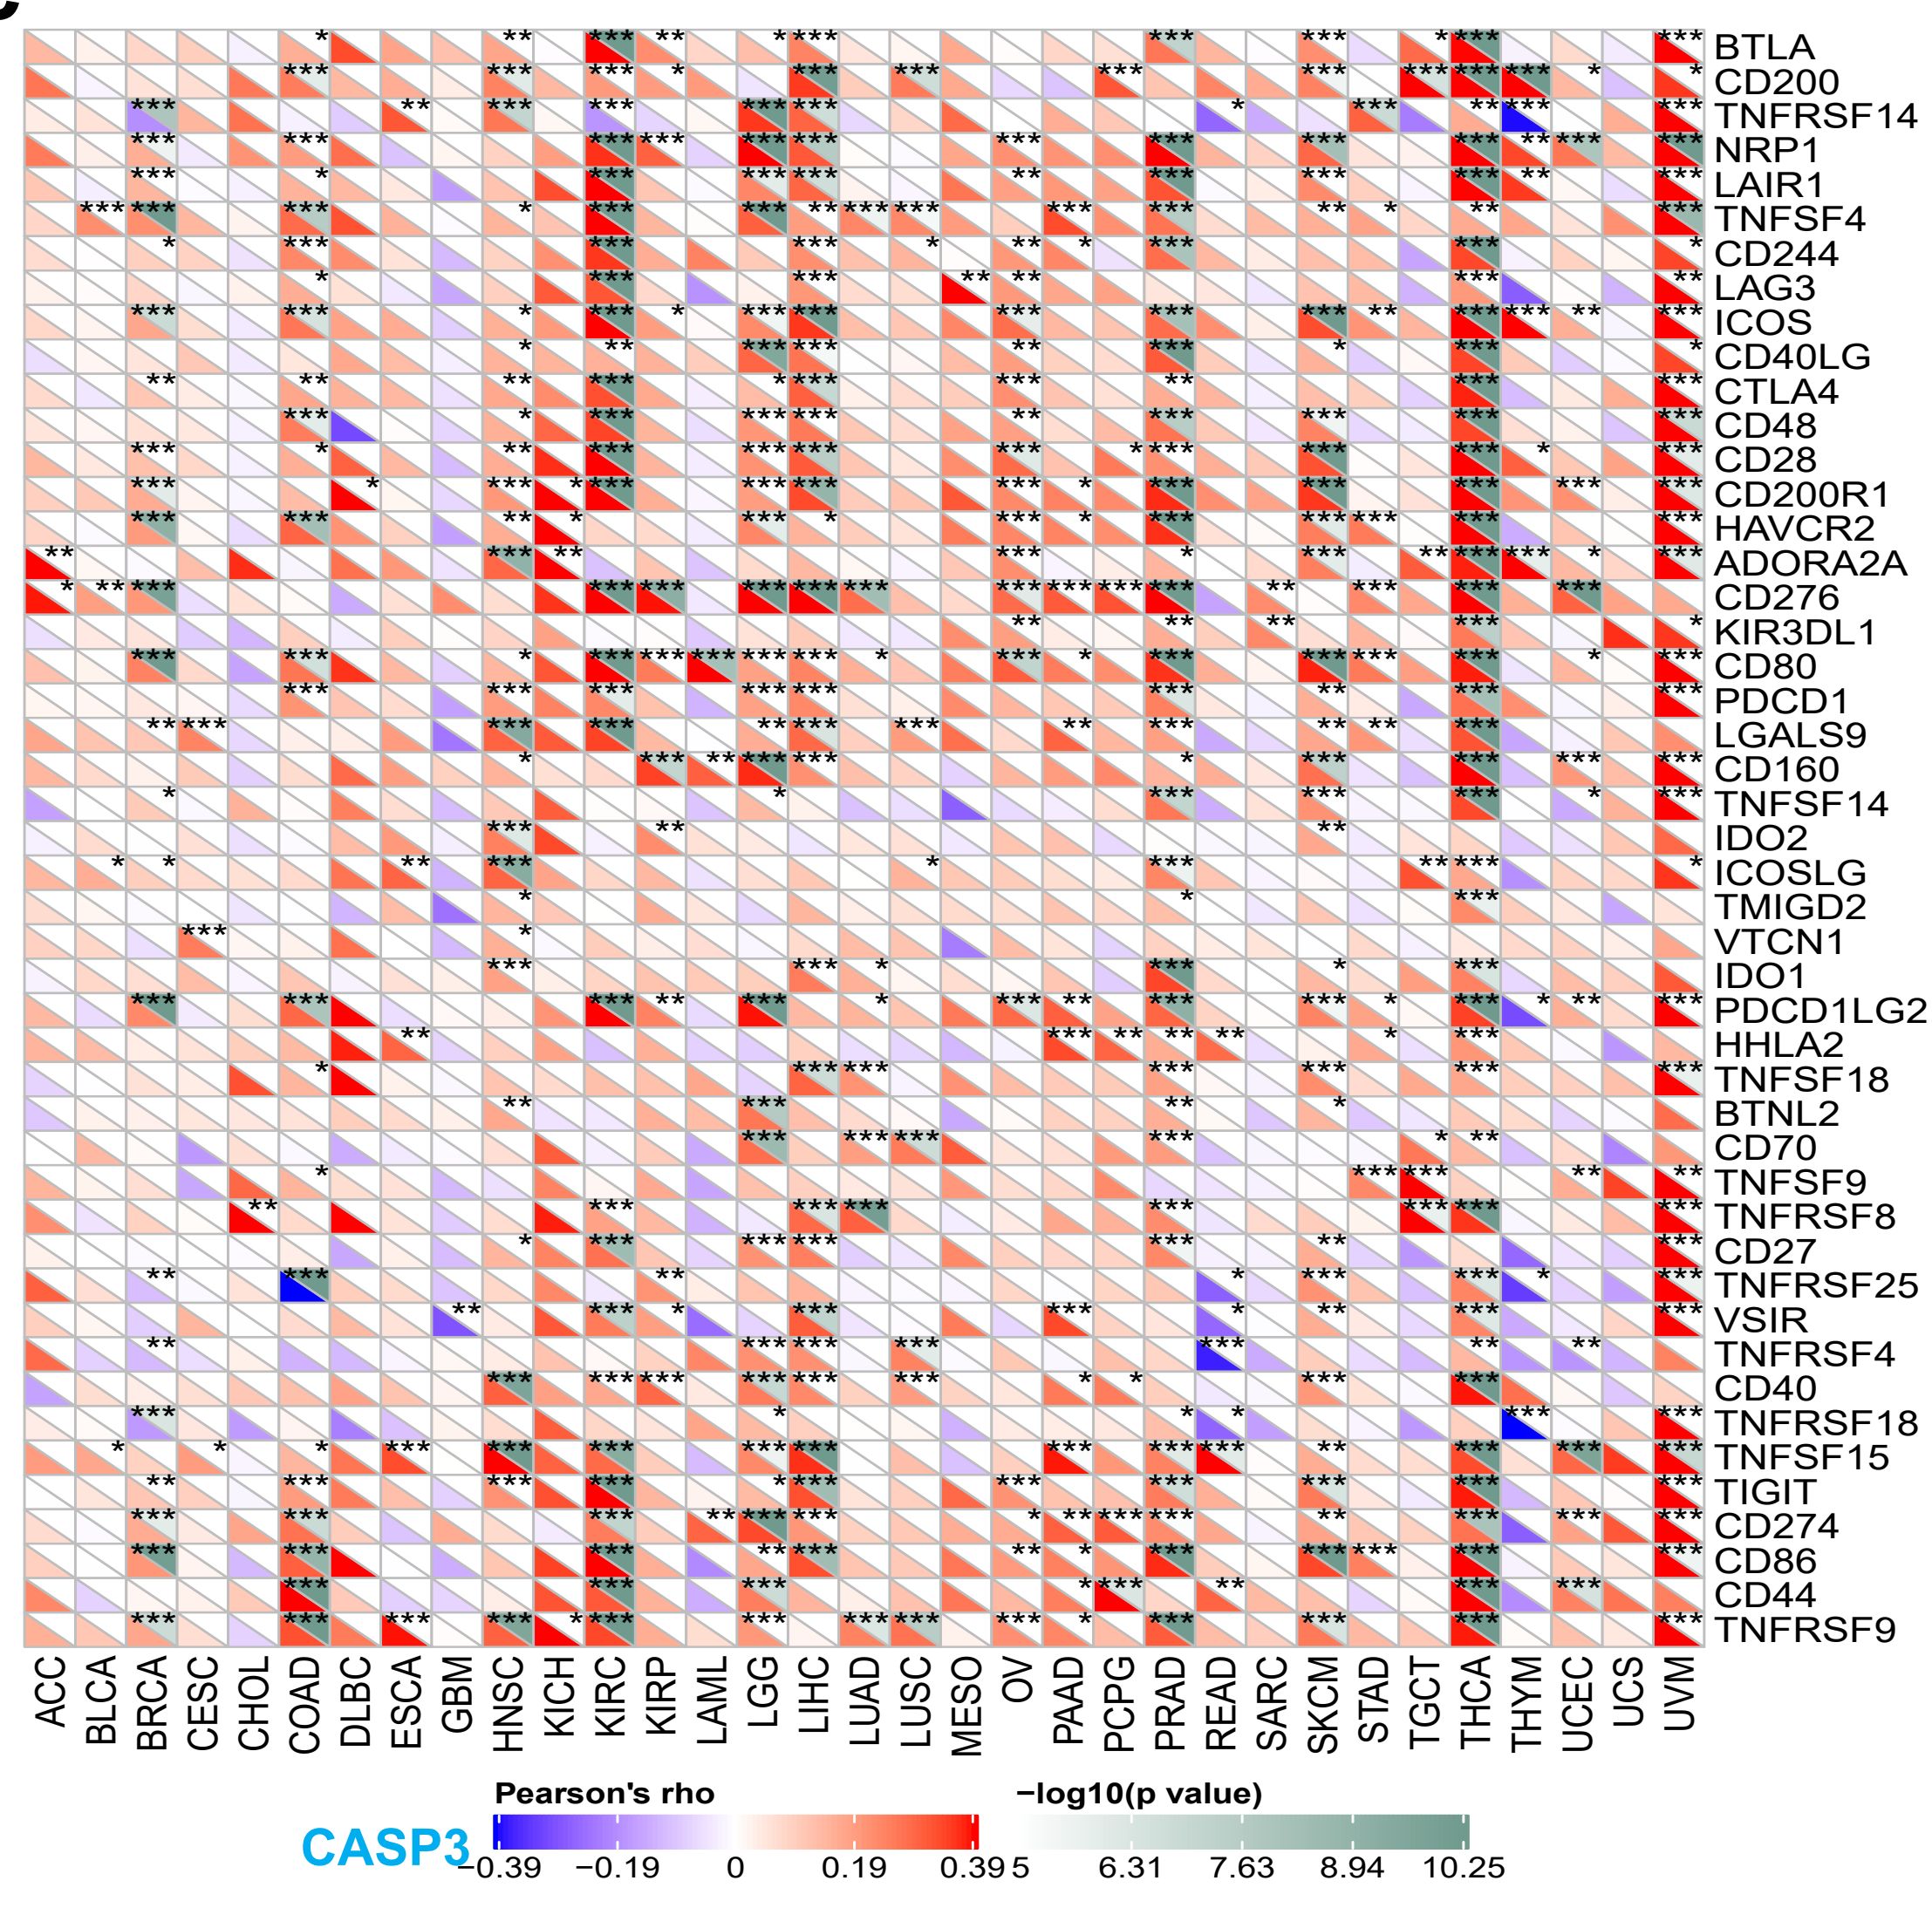**d**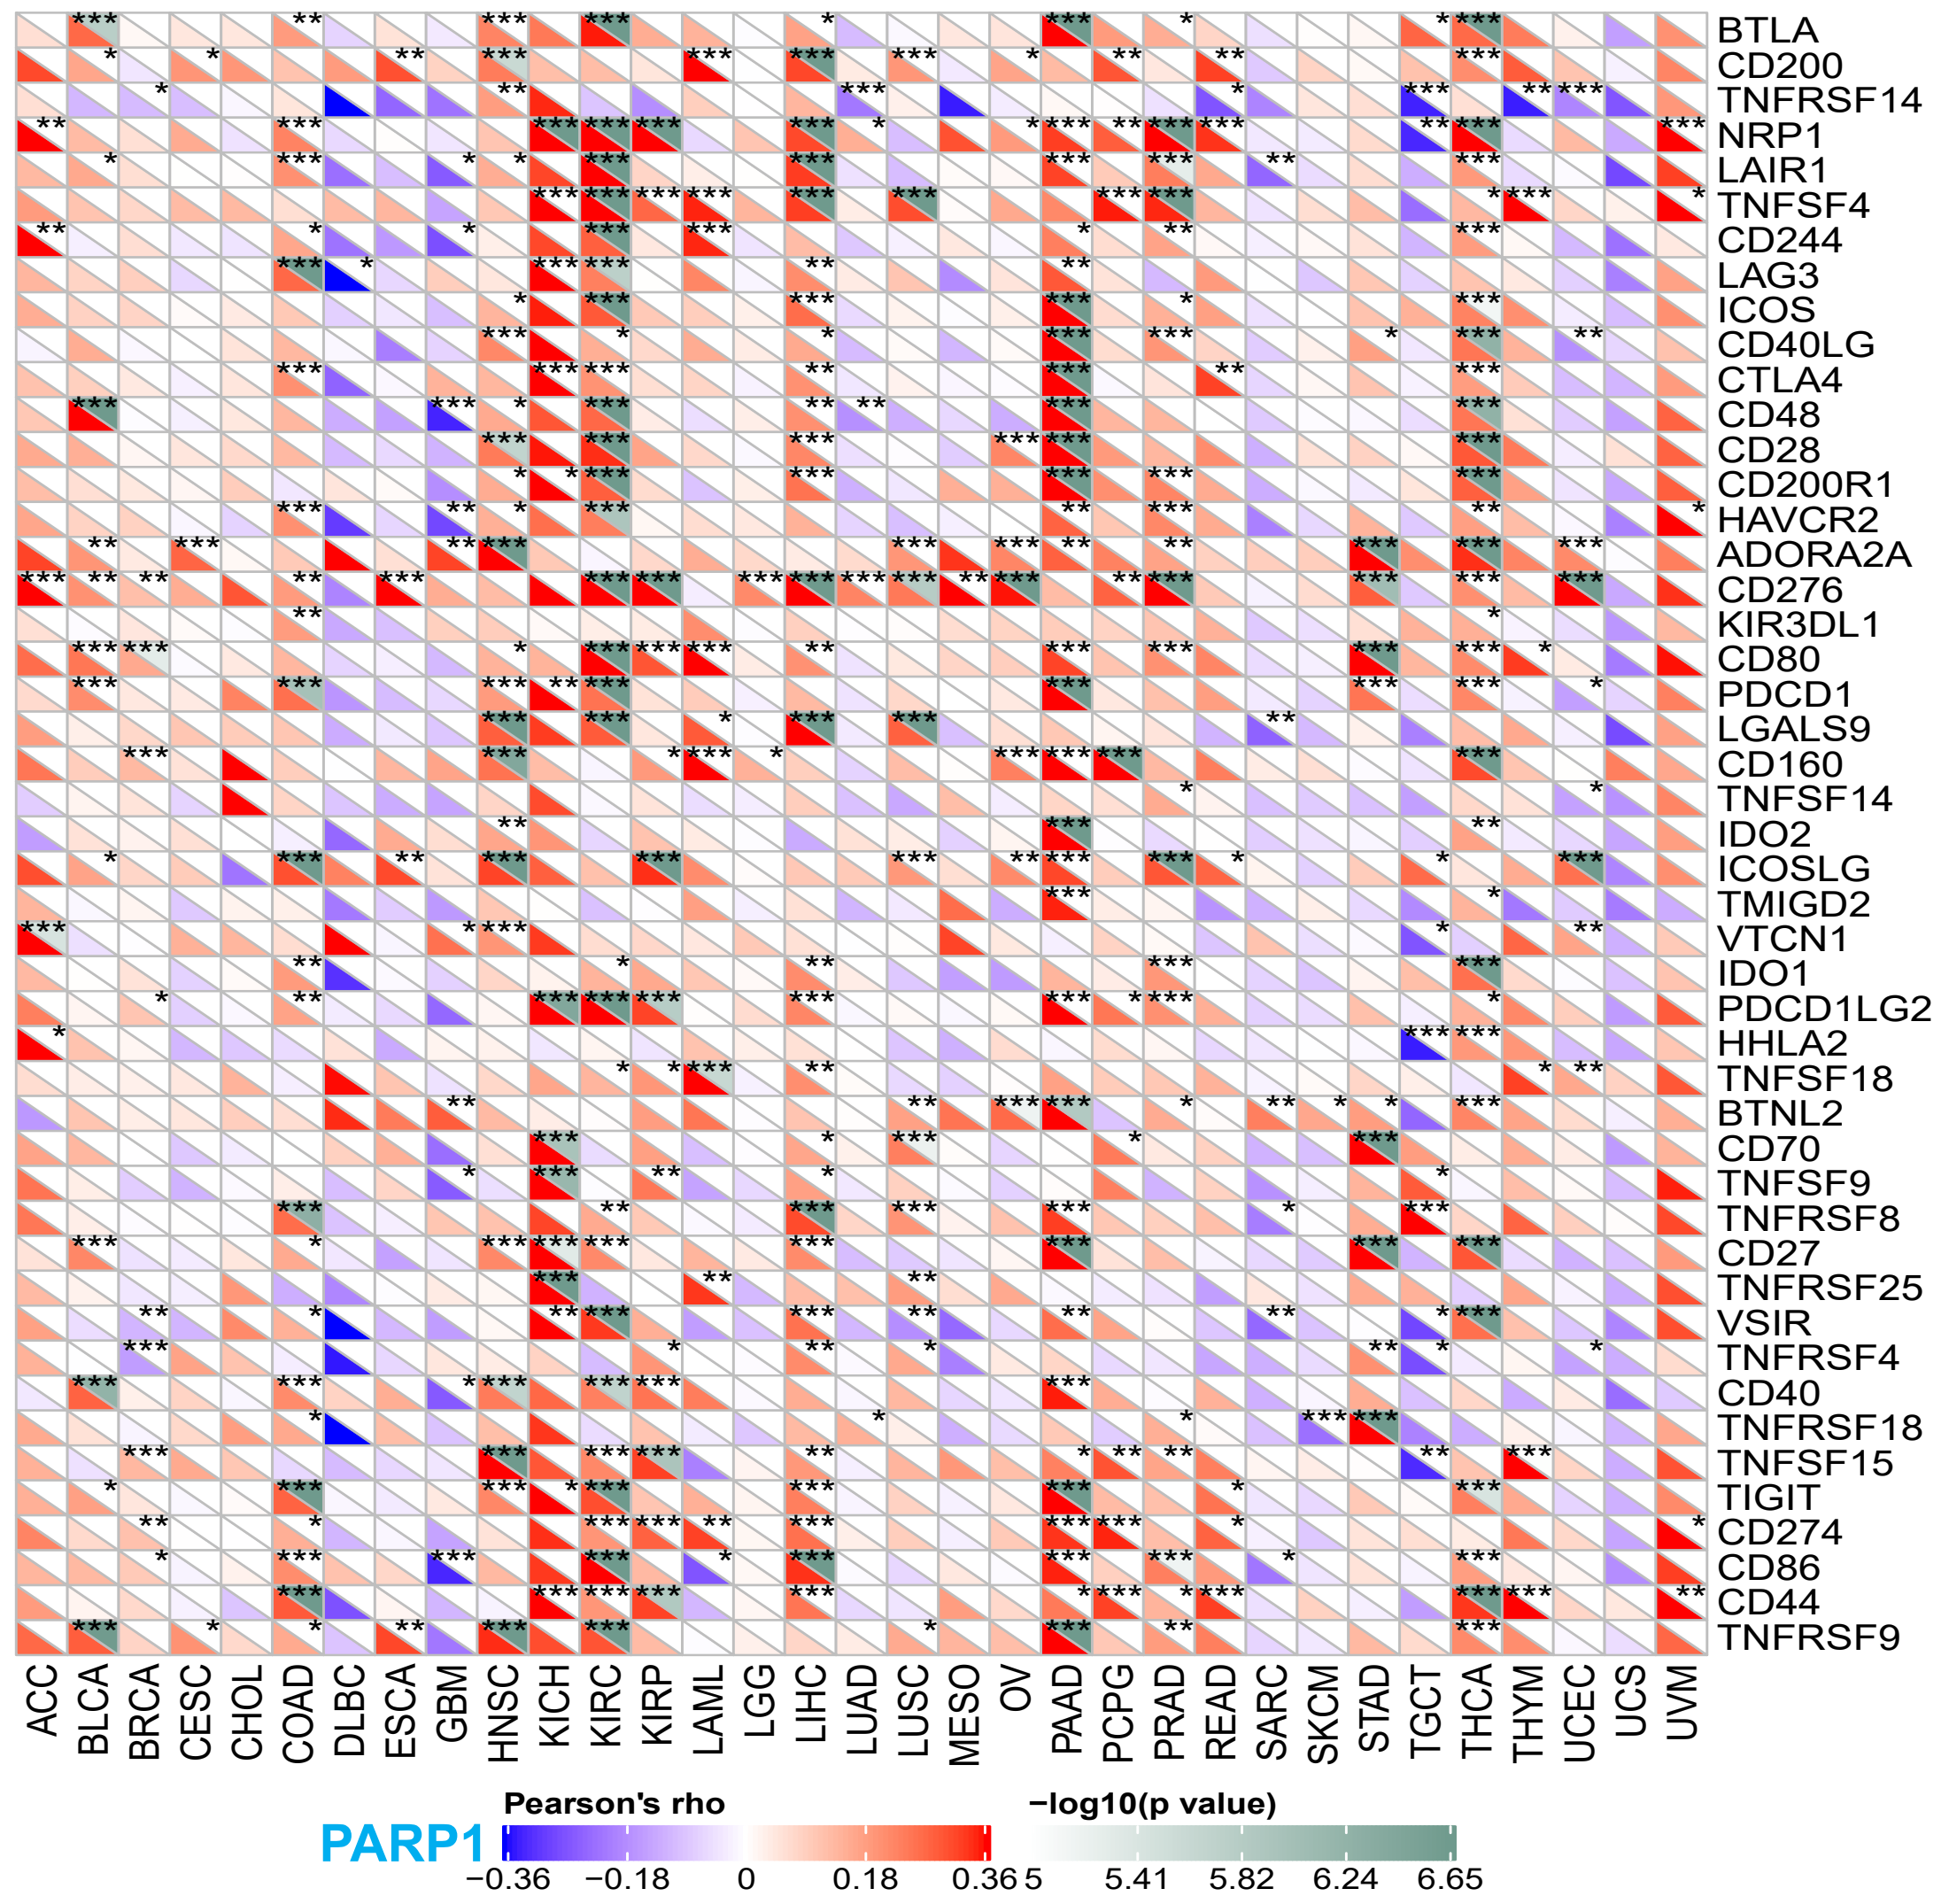**e**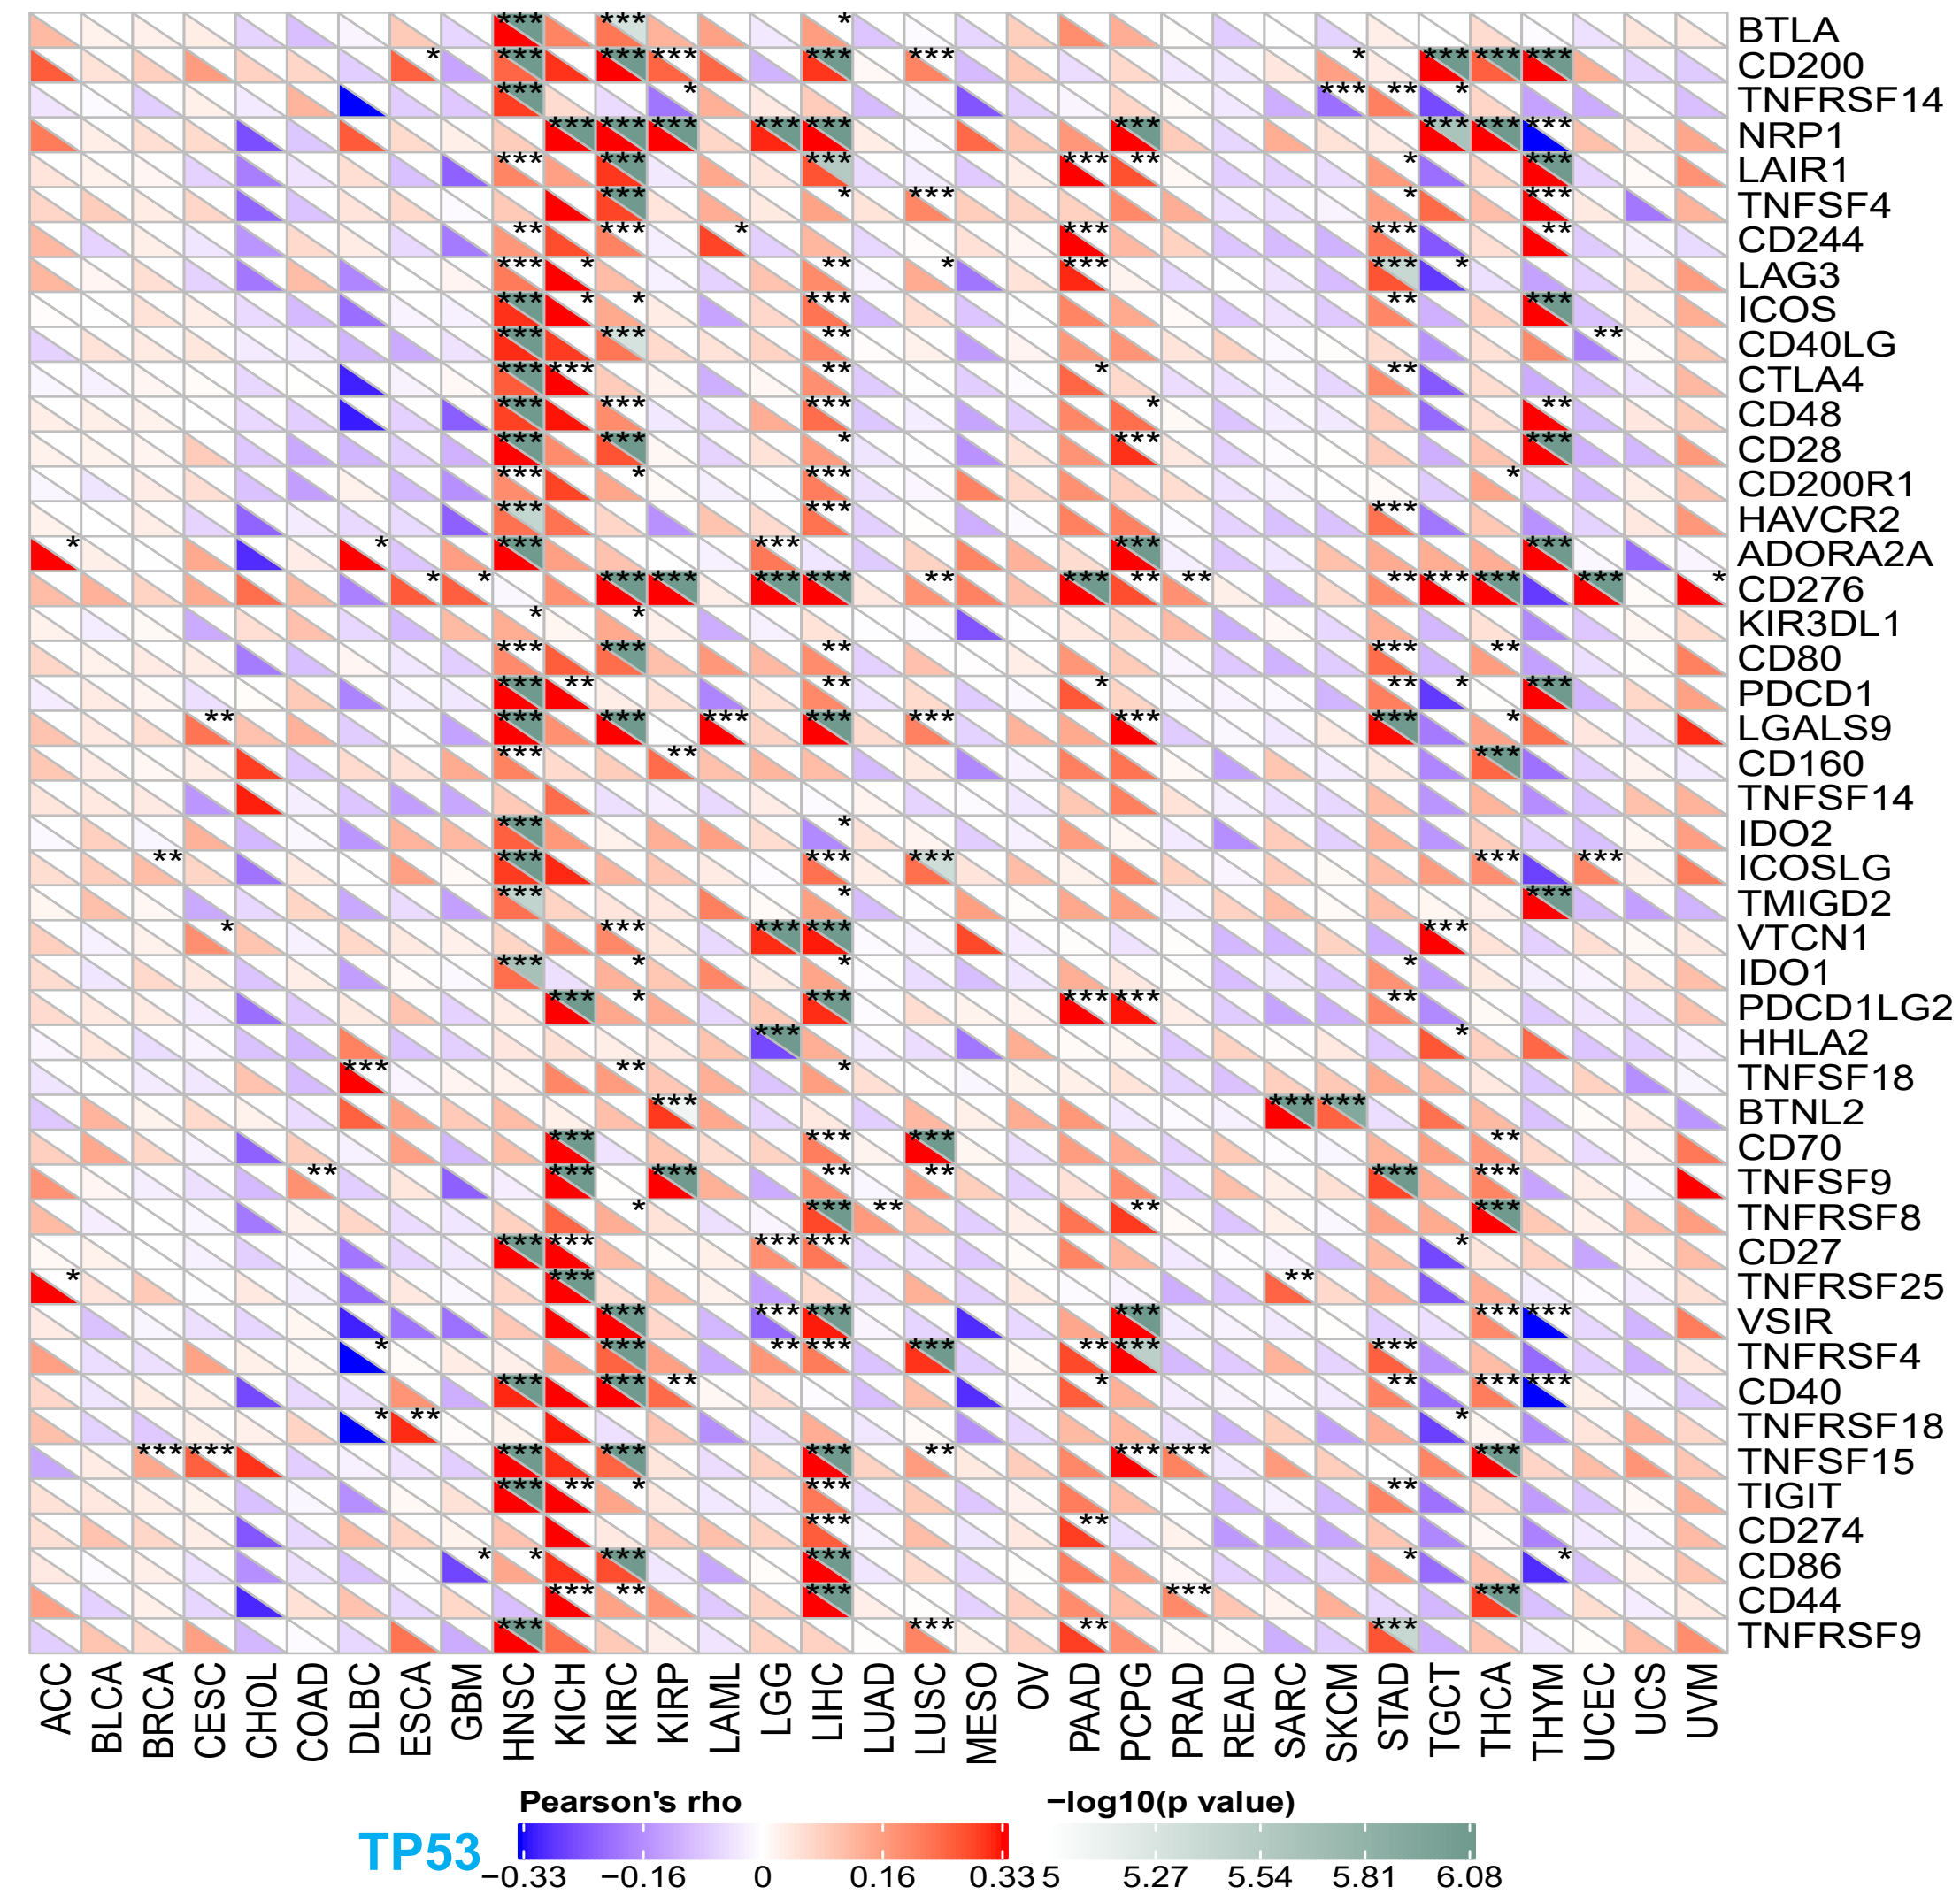

Supplement: Supplementary file 19 [file 1]

**a**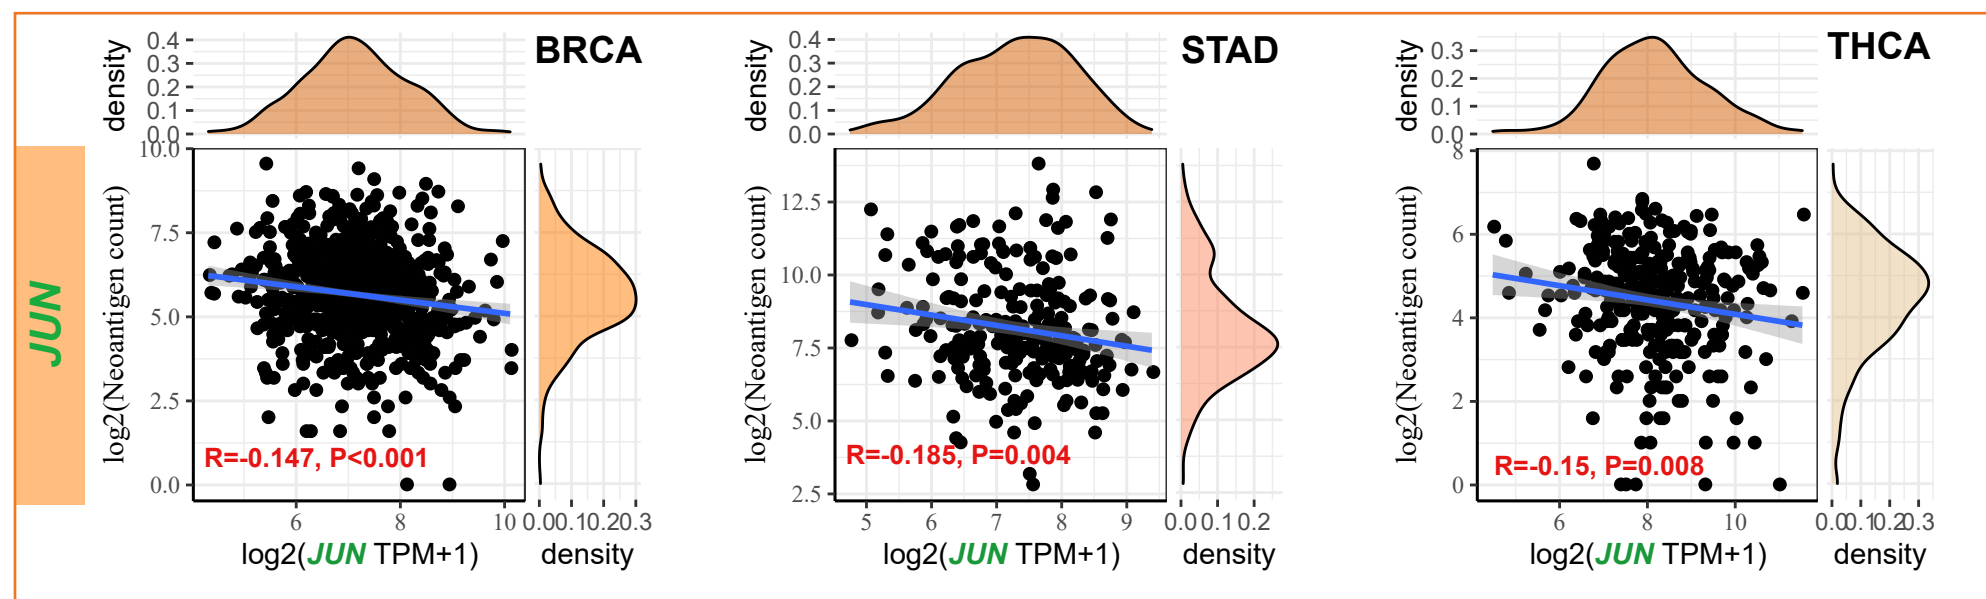**b**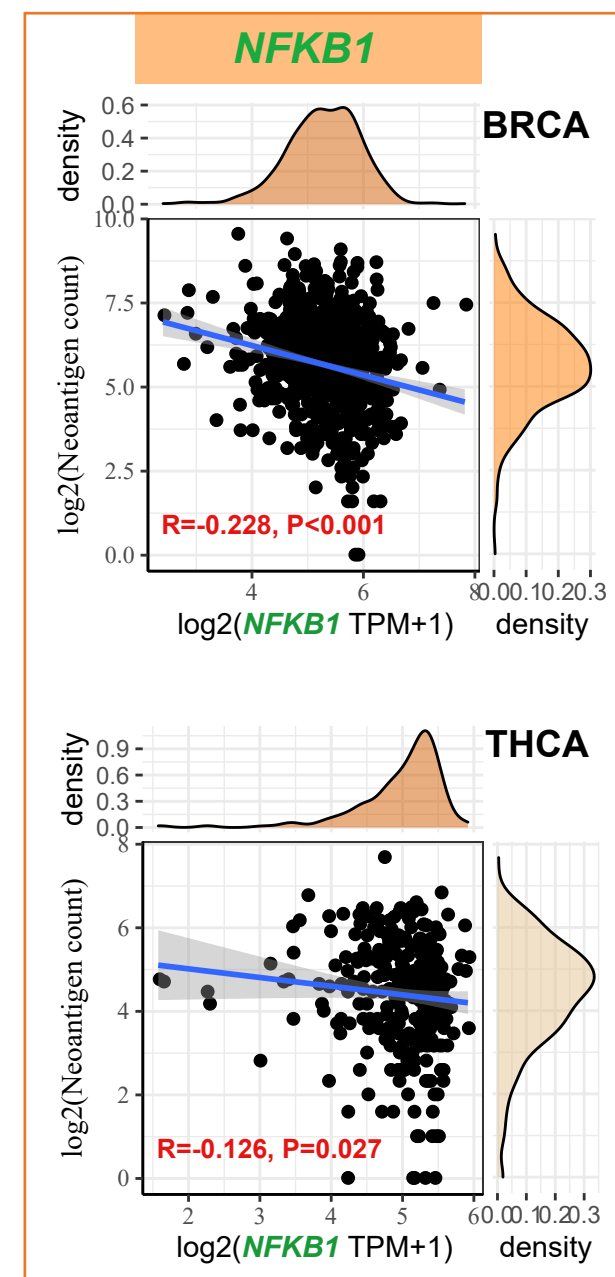**c**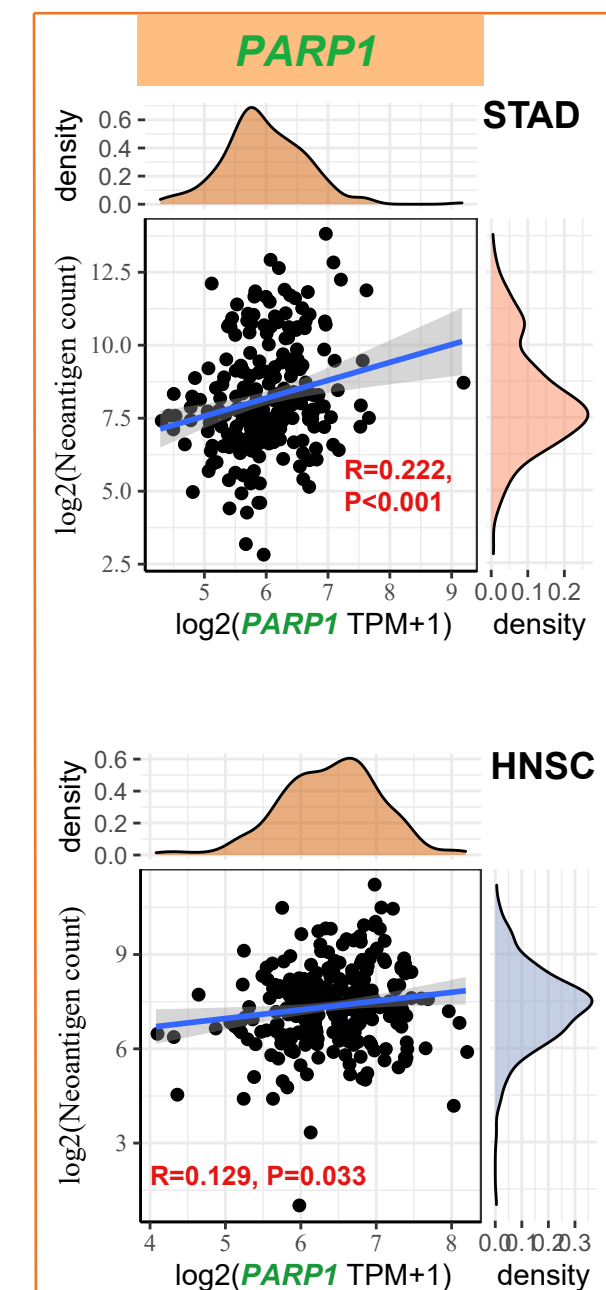**d**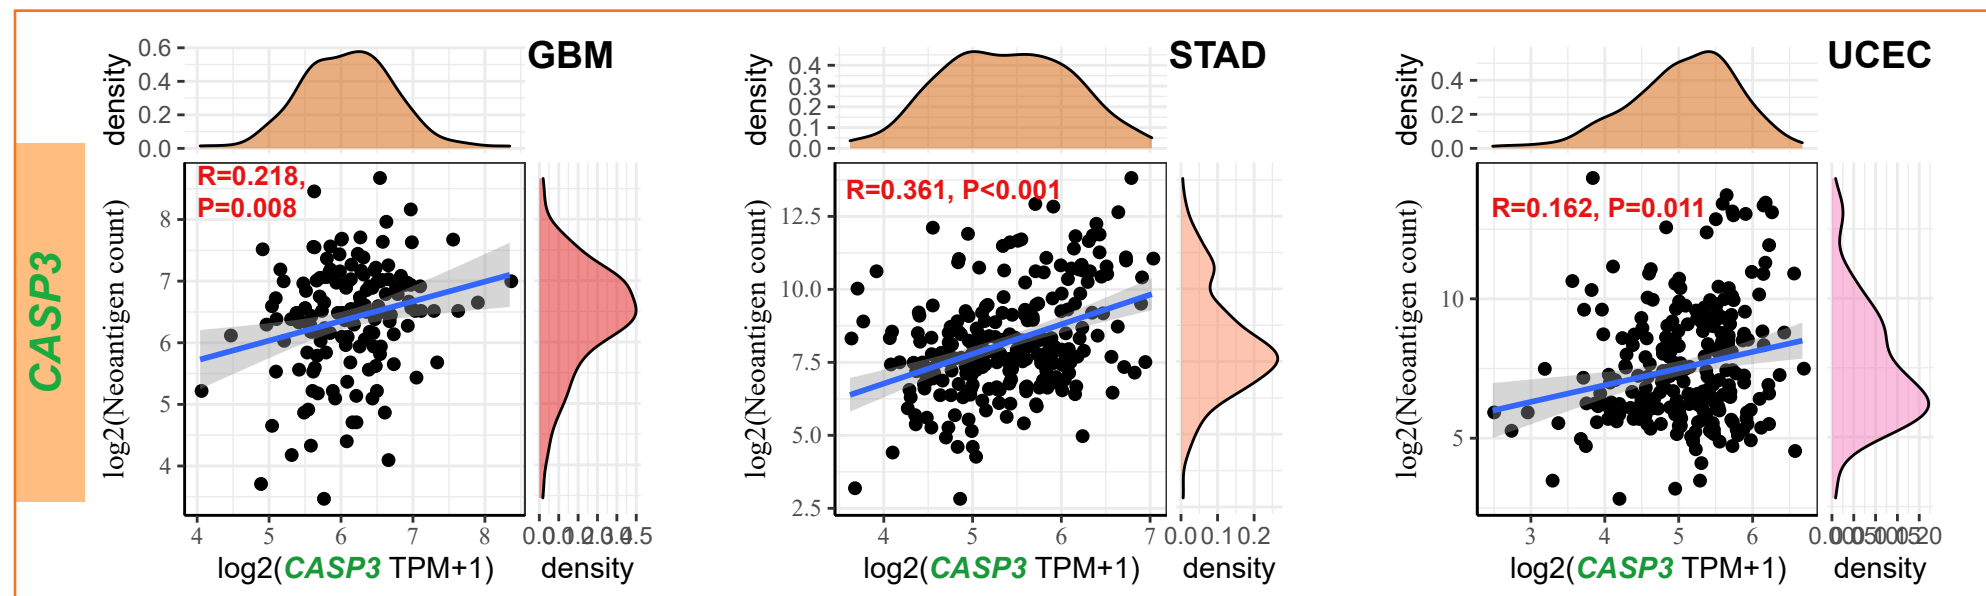**e**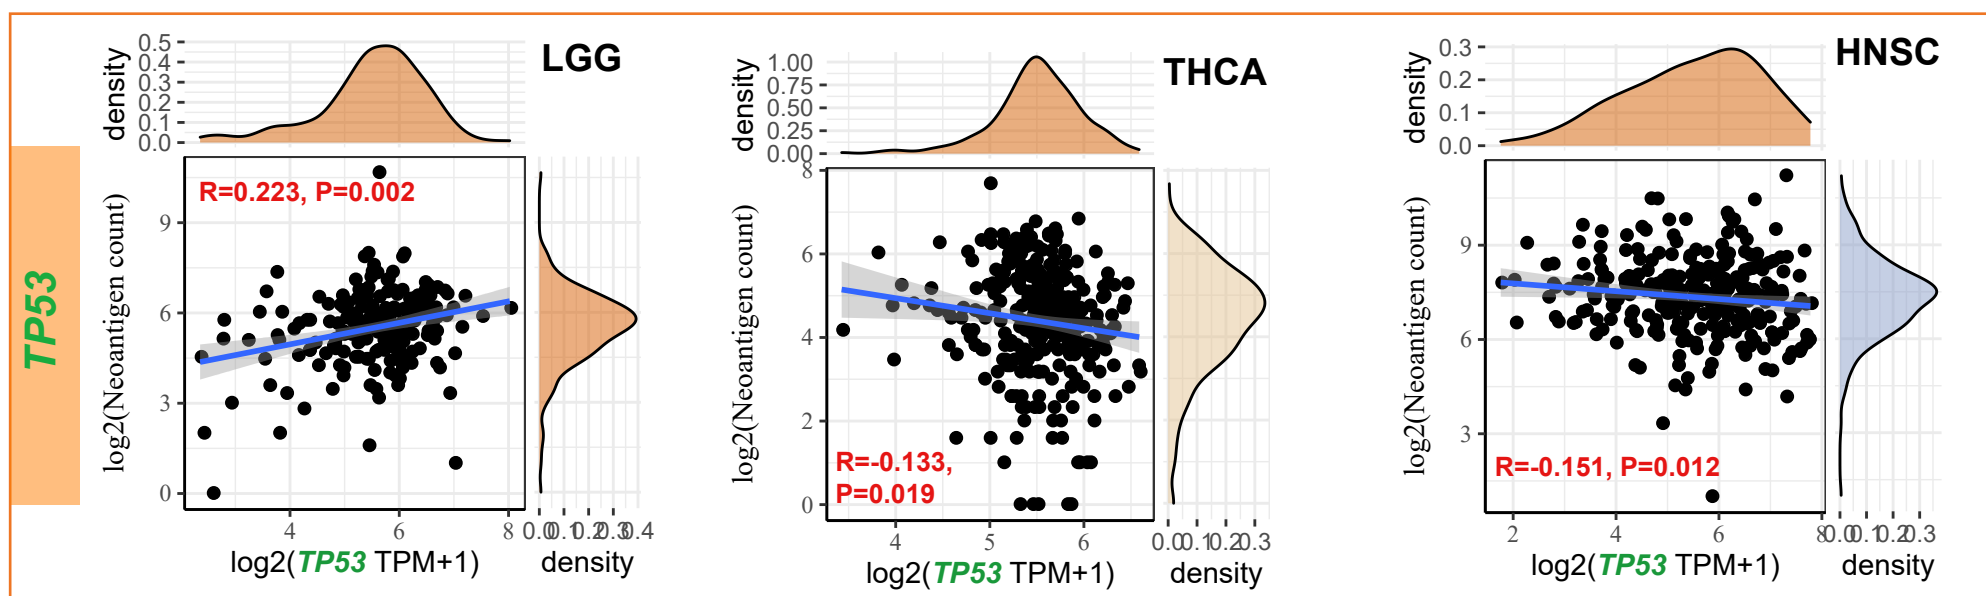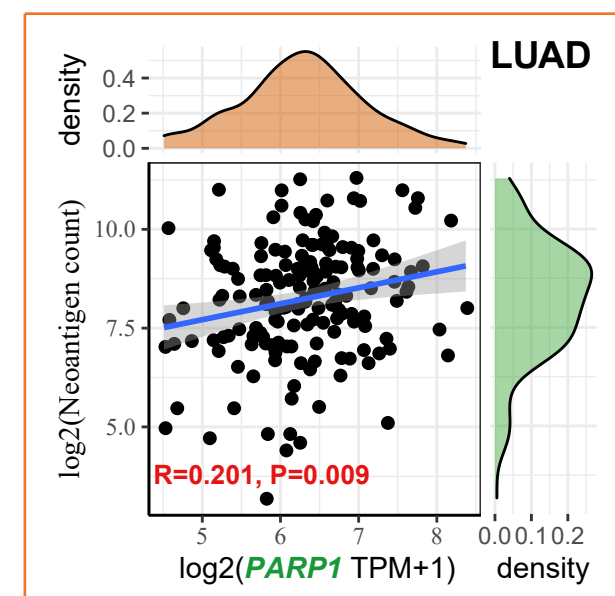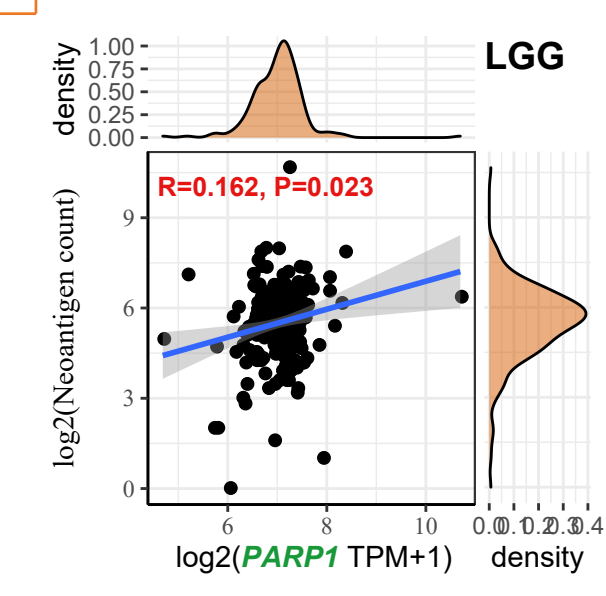

Supplement: Supplementary file 20 [file 1]

a JUN

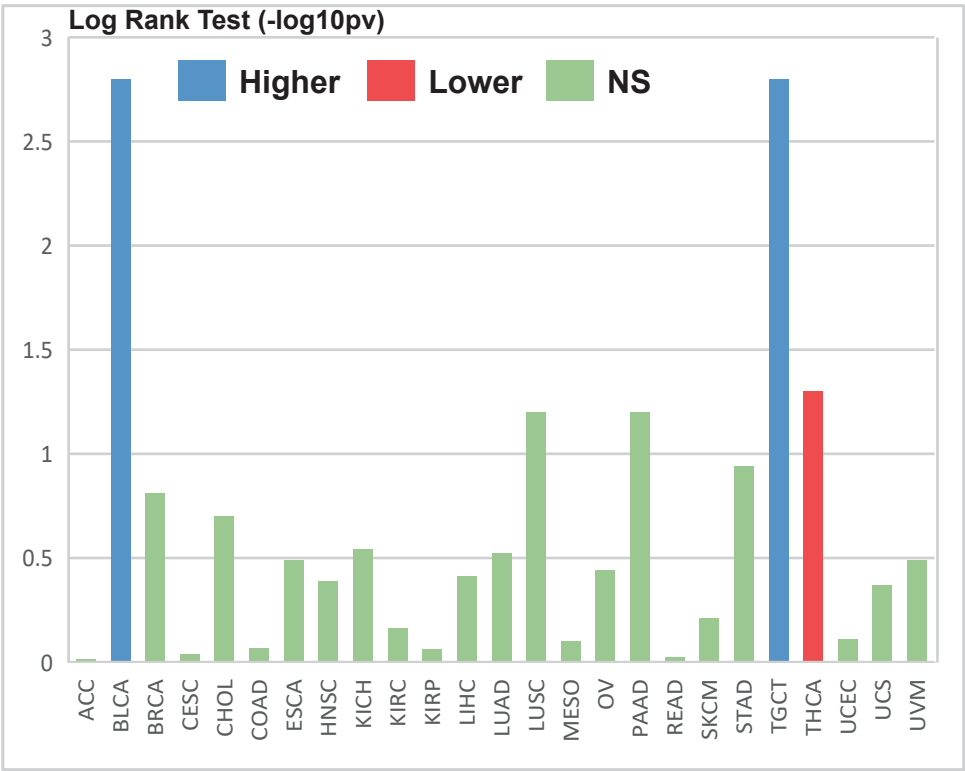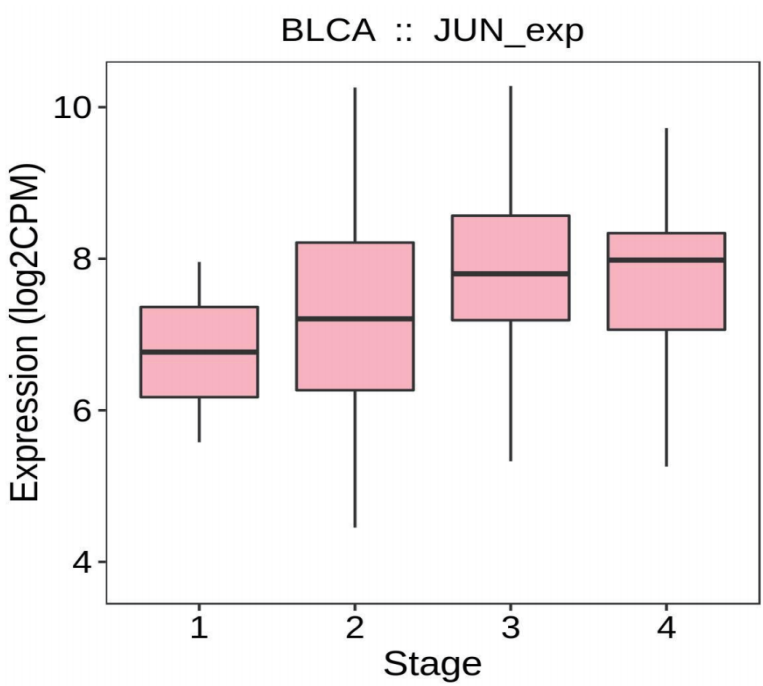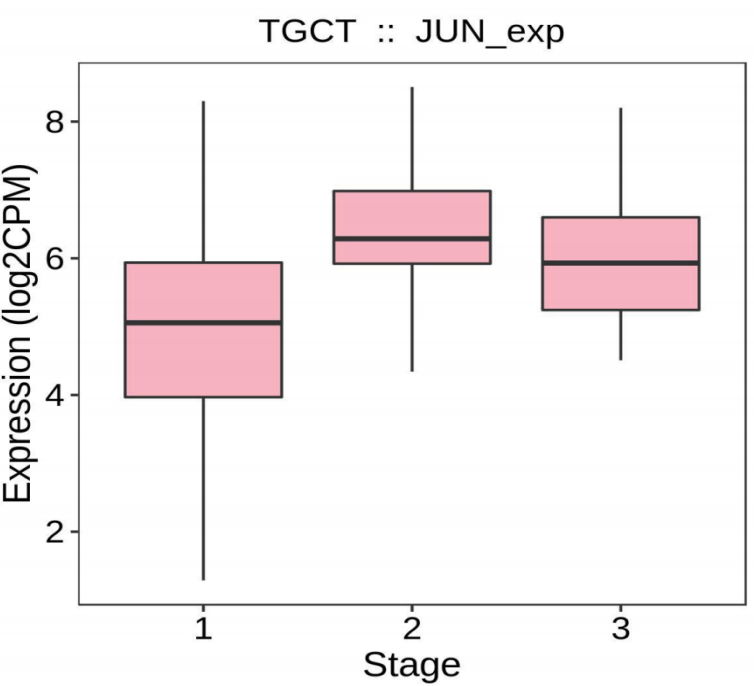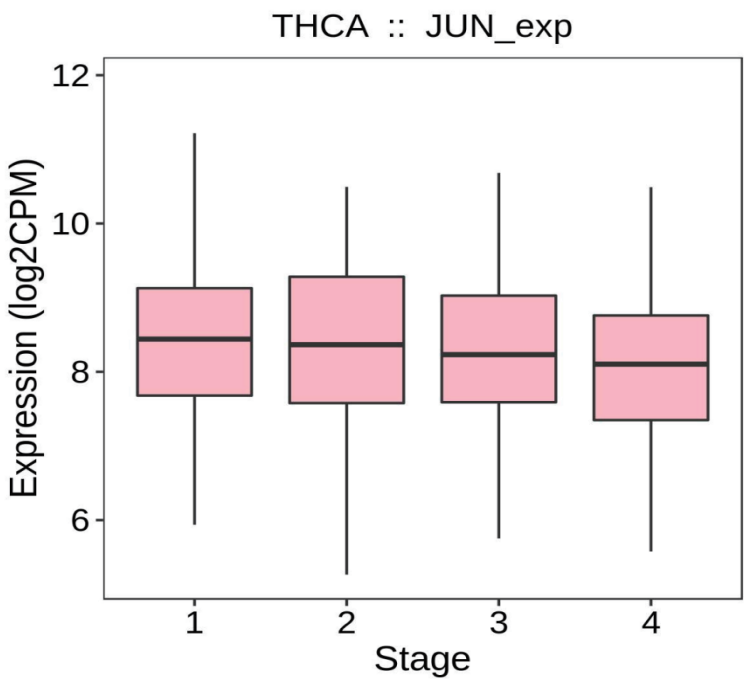

b NFKB1

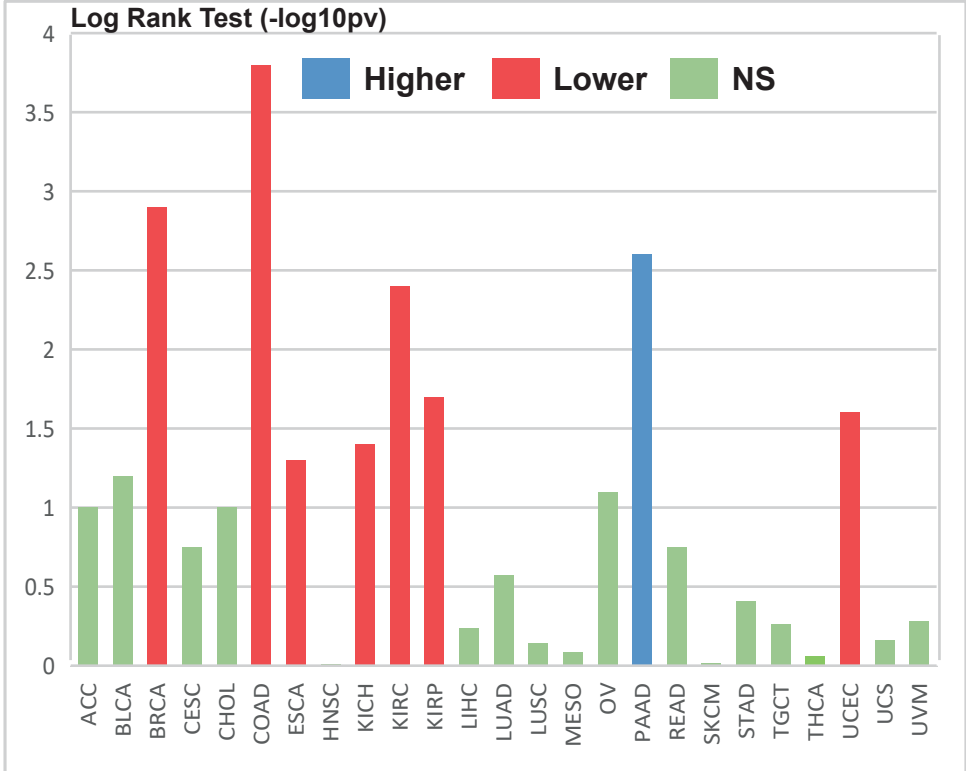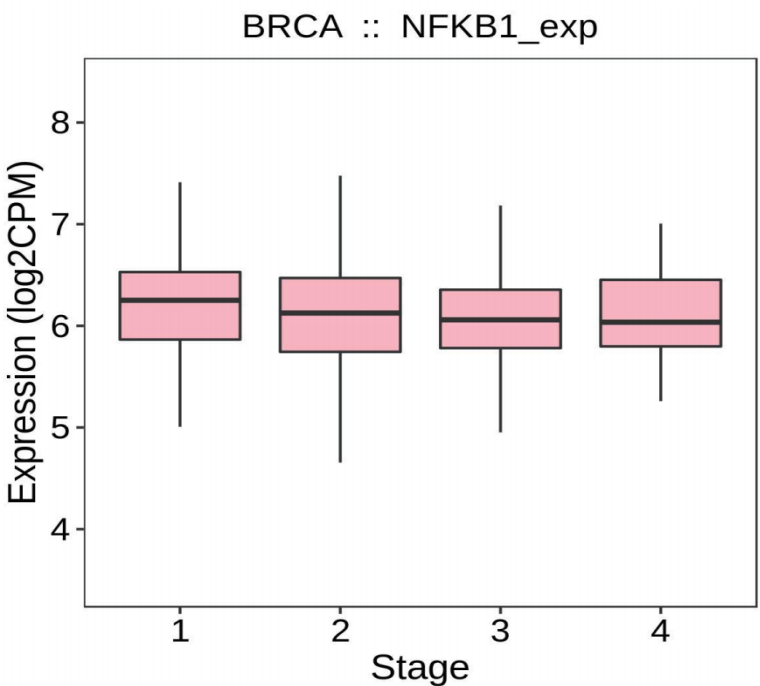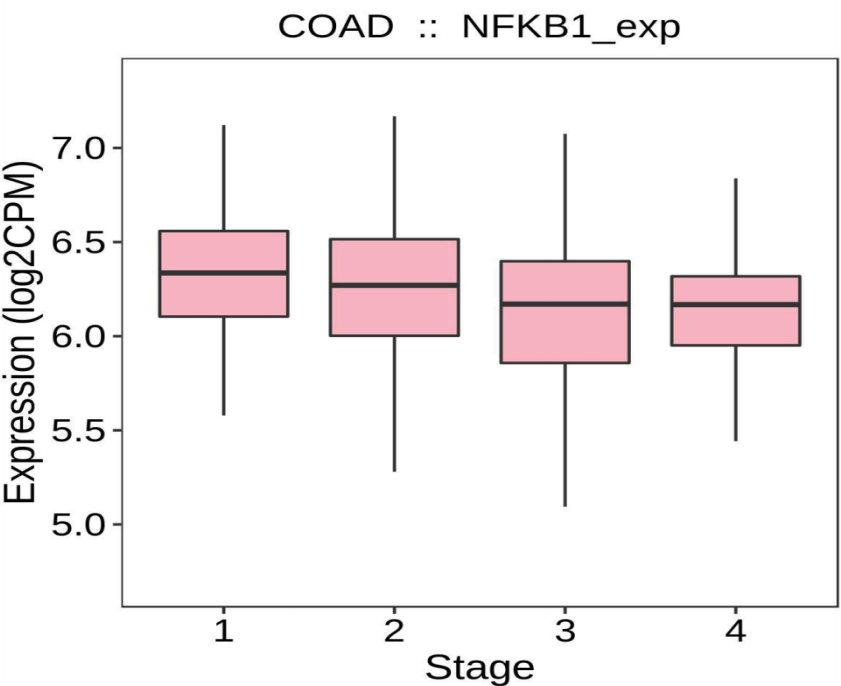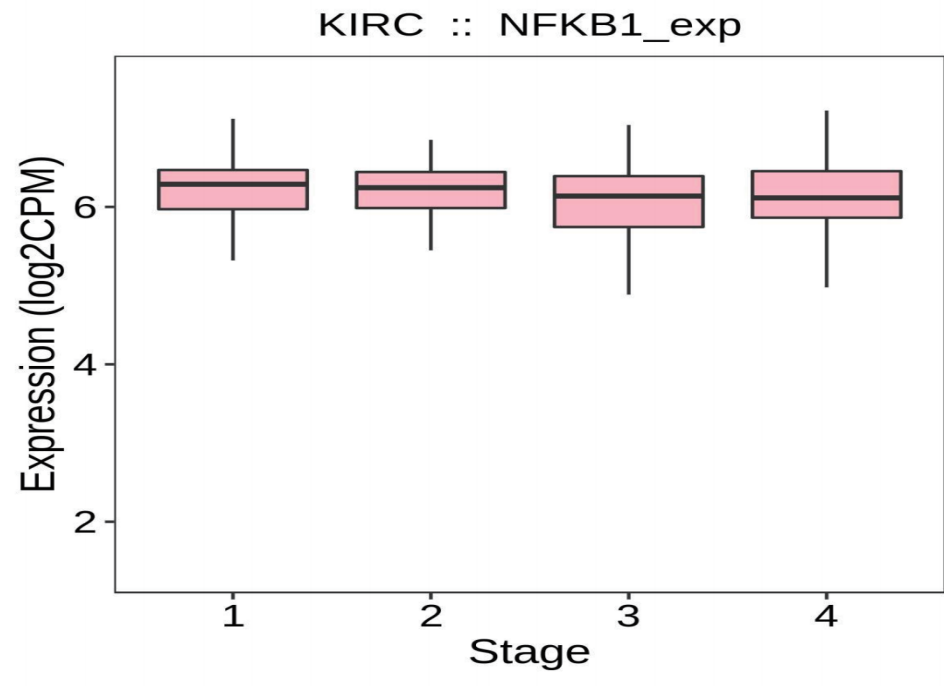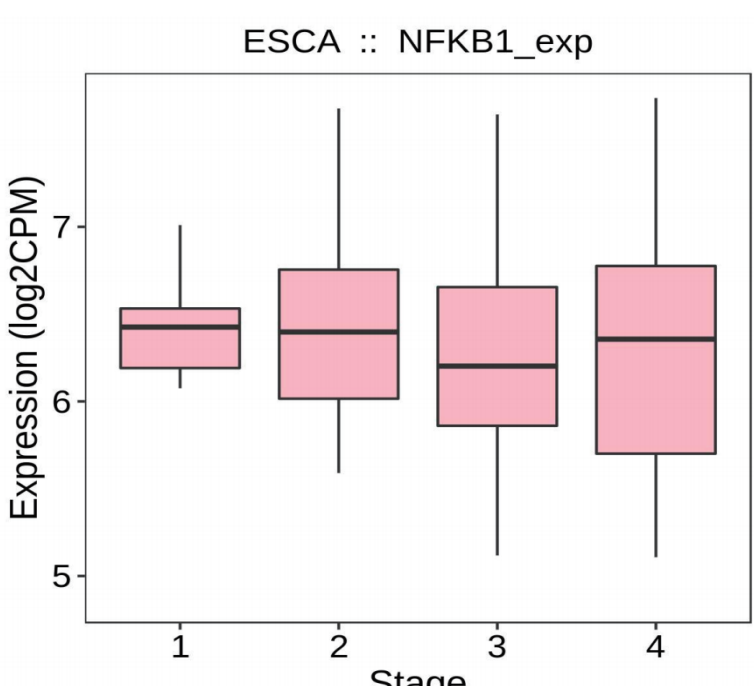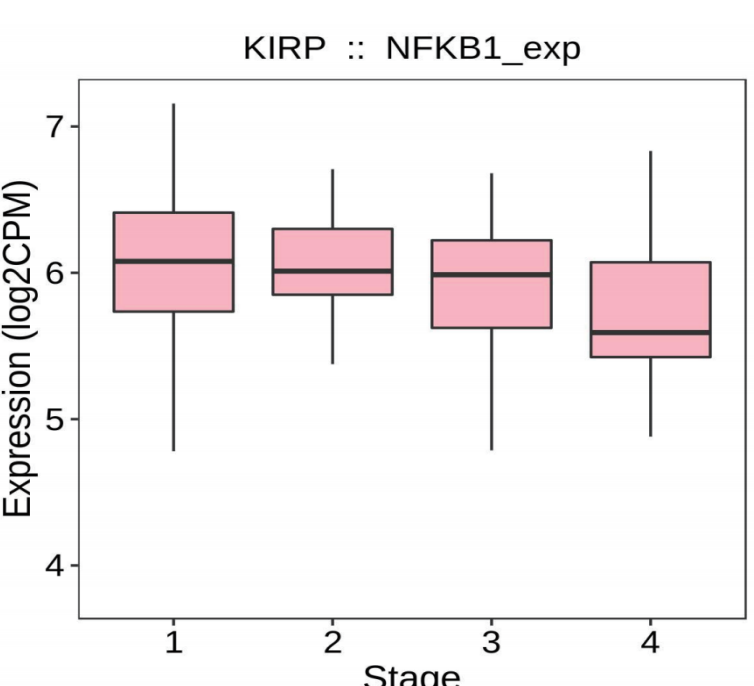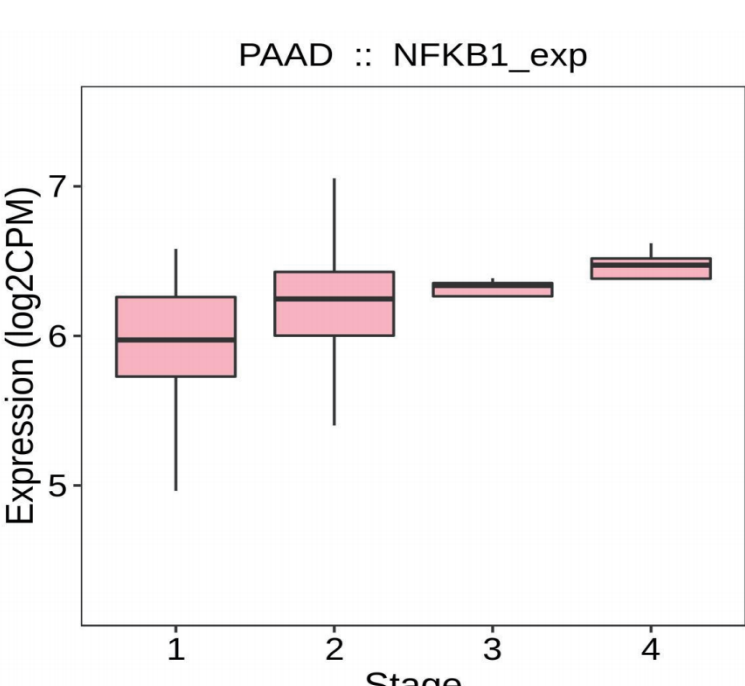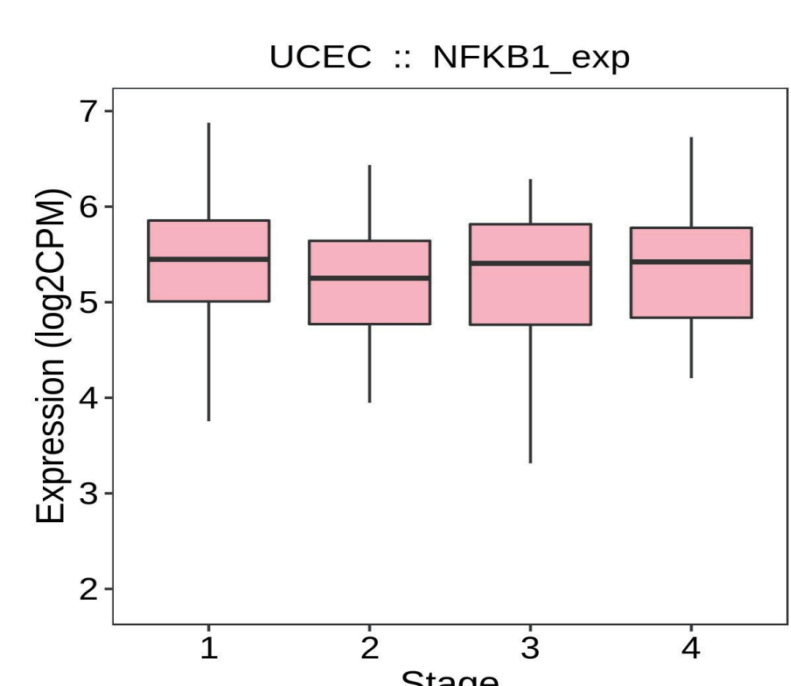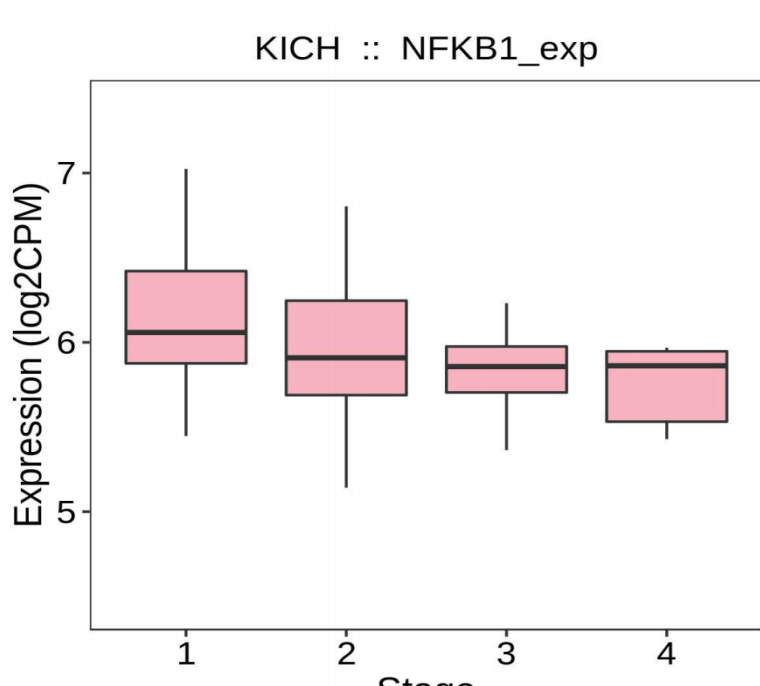

c CASP3

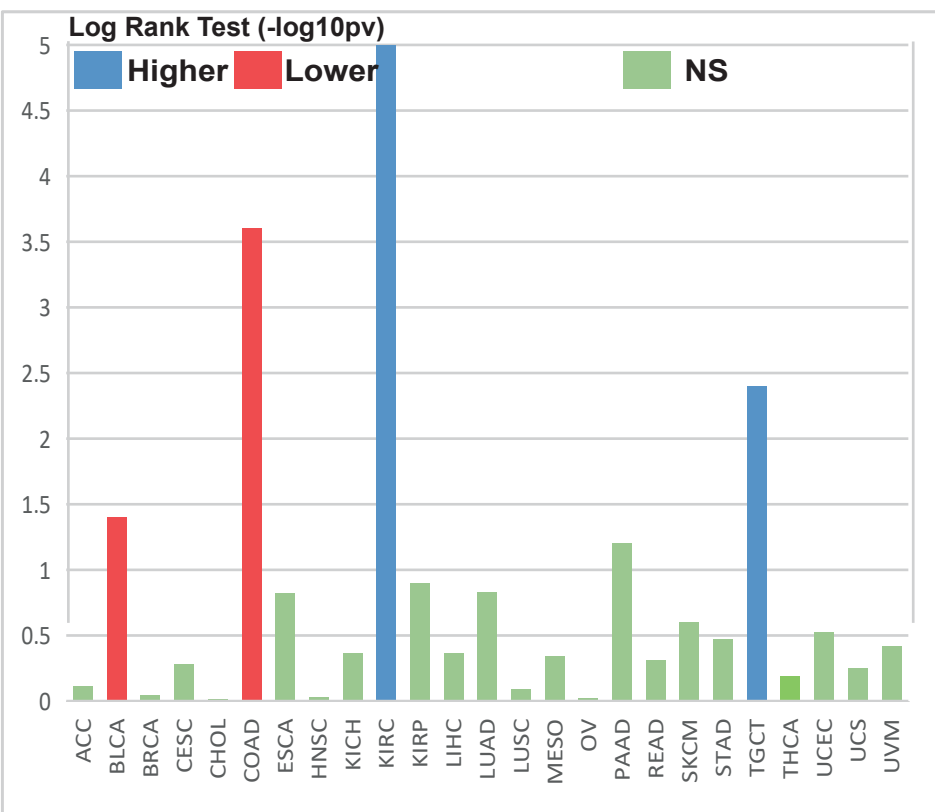

d PARP1

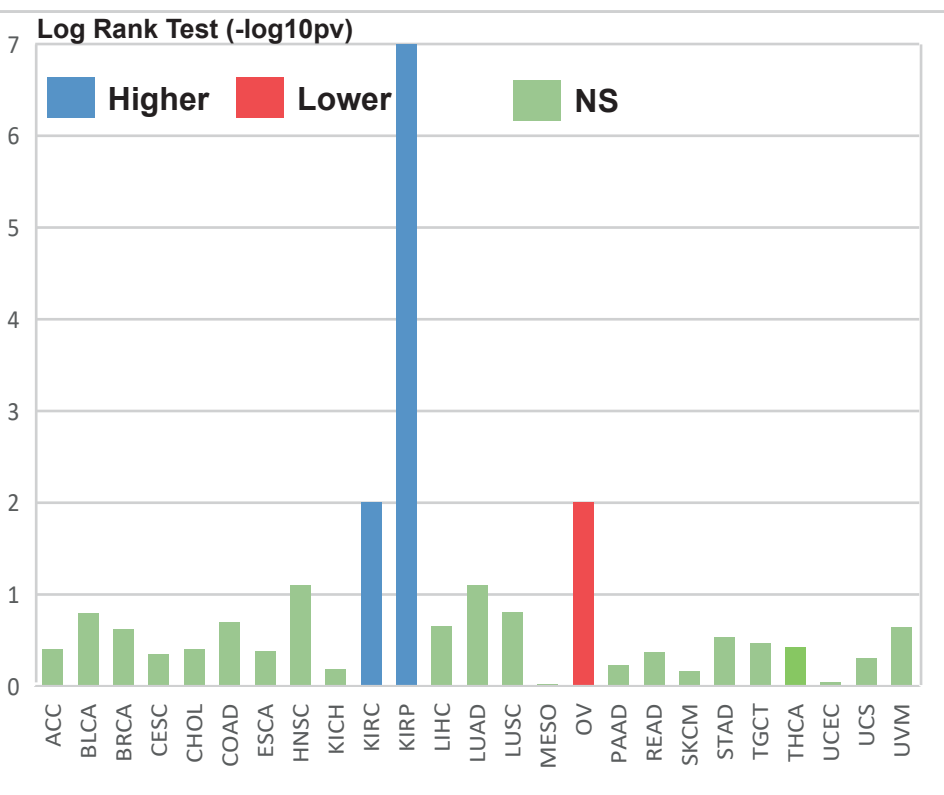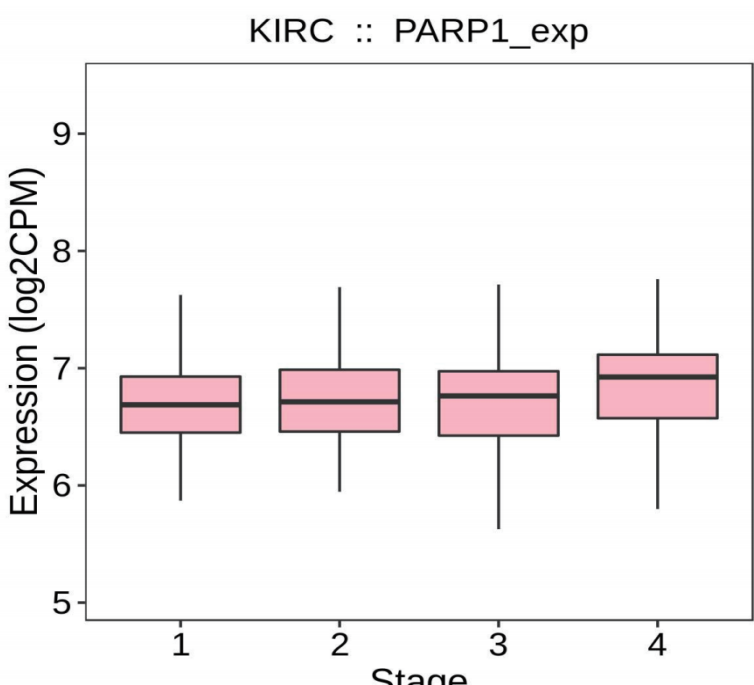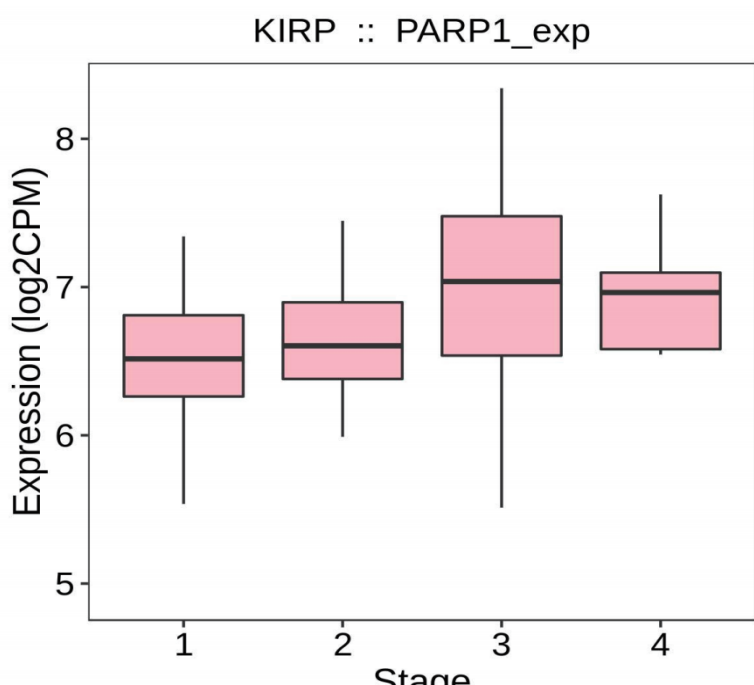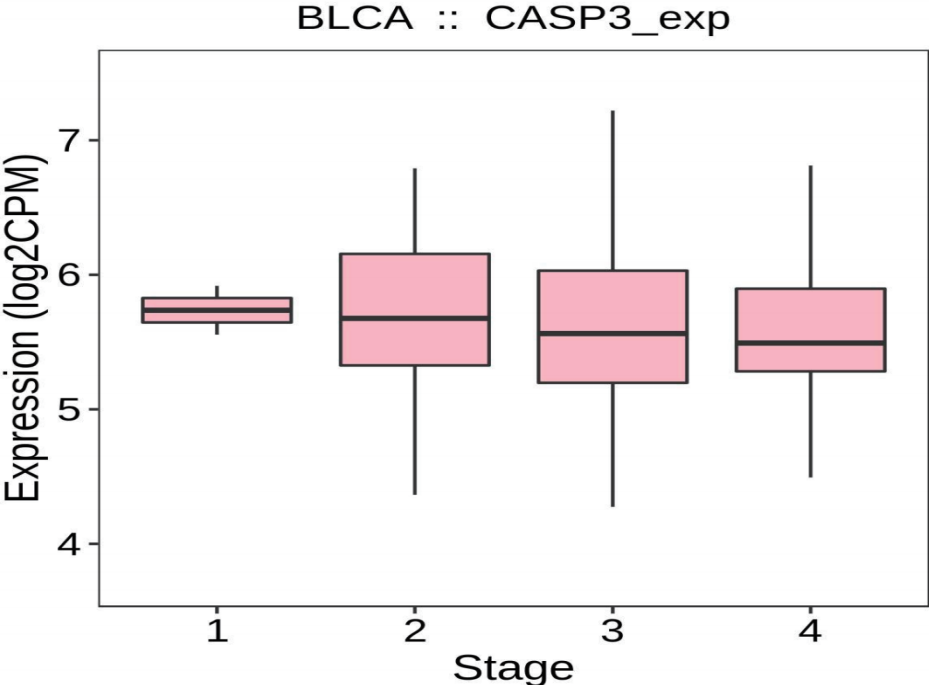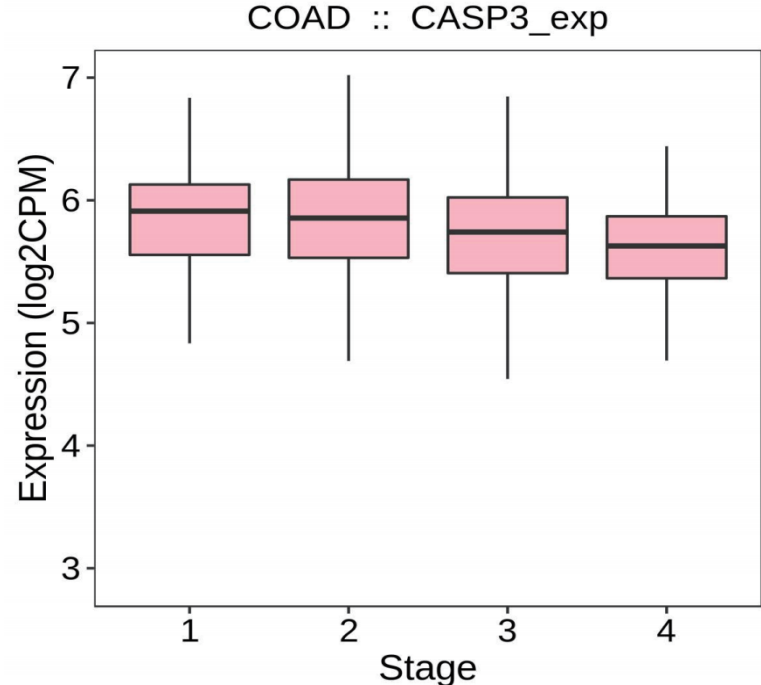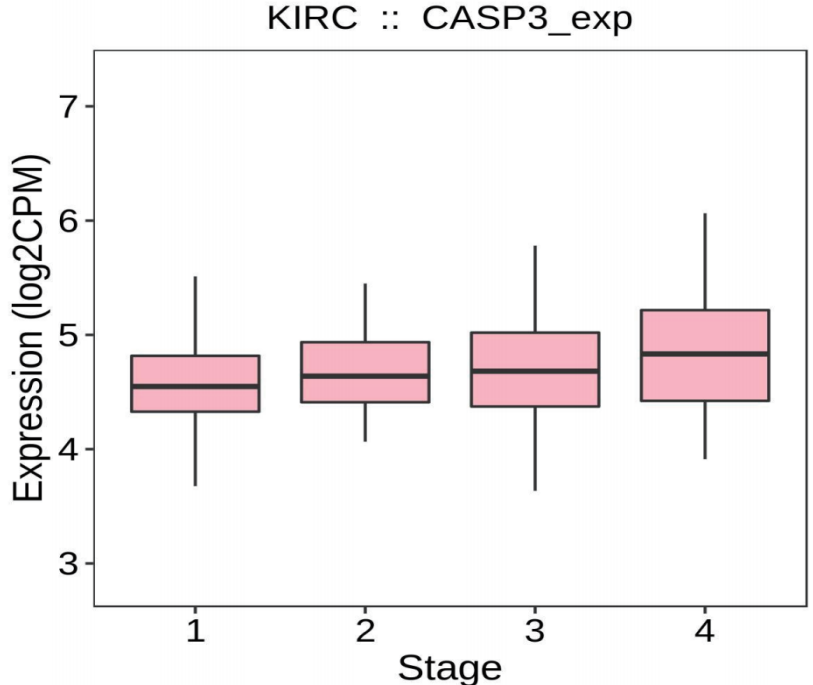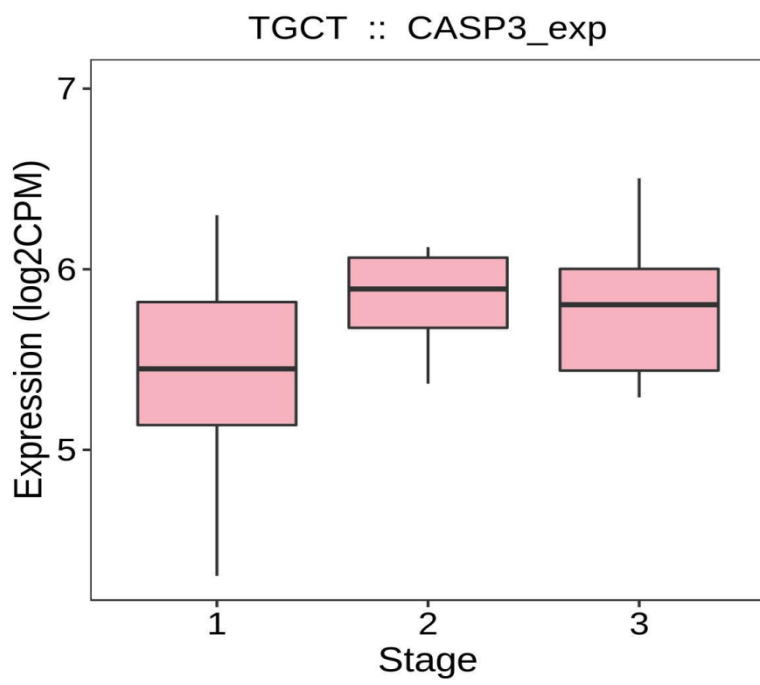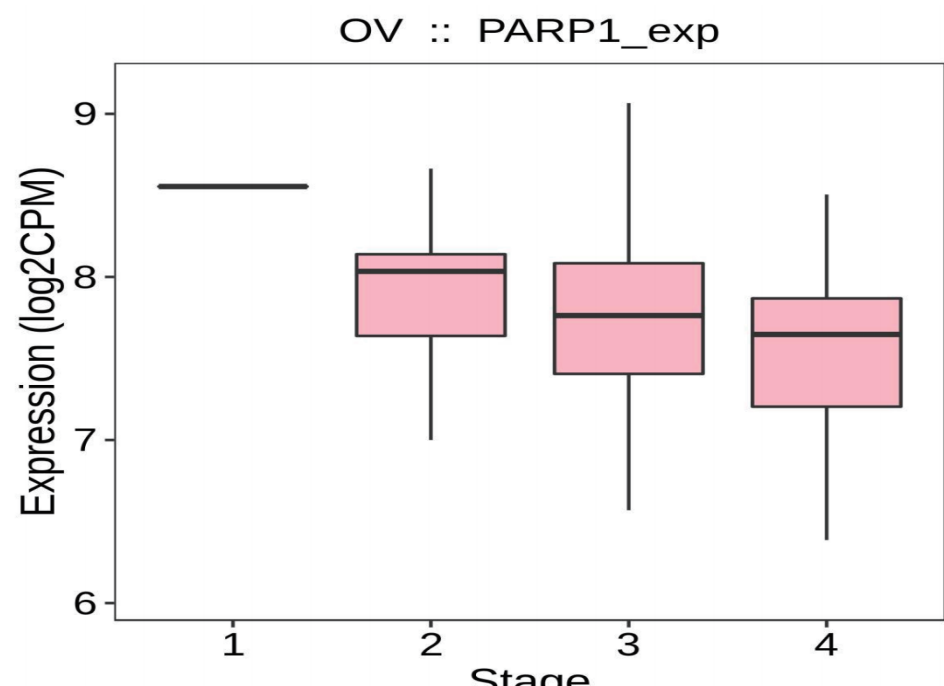

e TP53

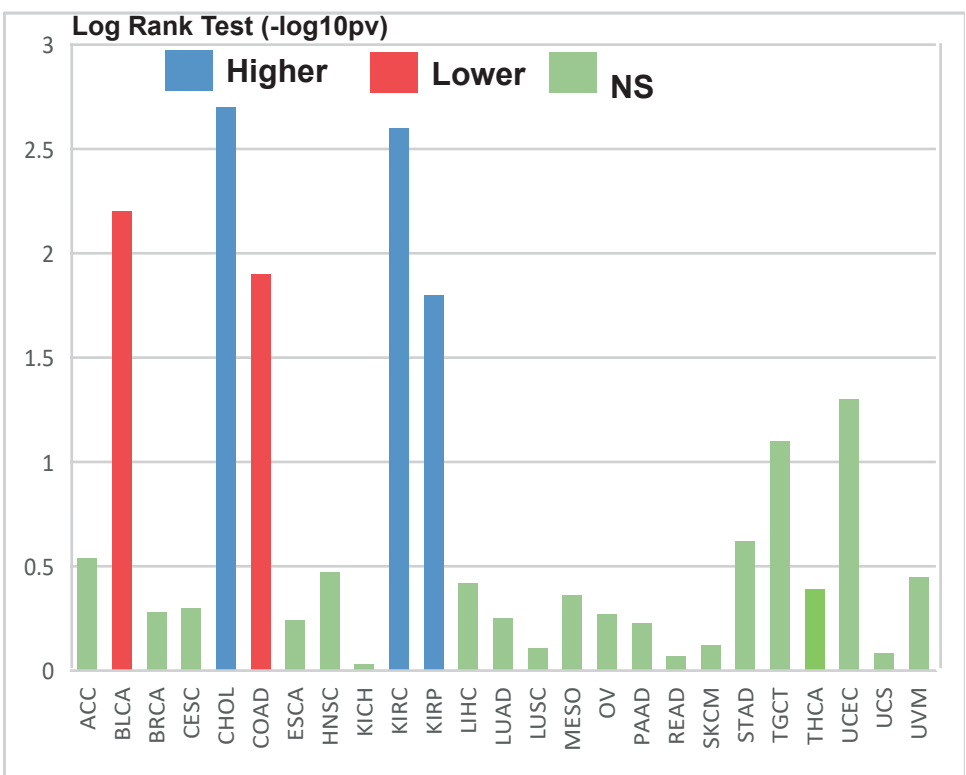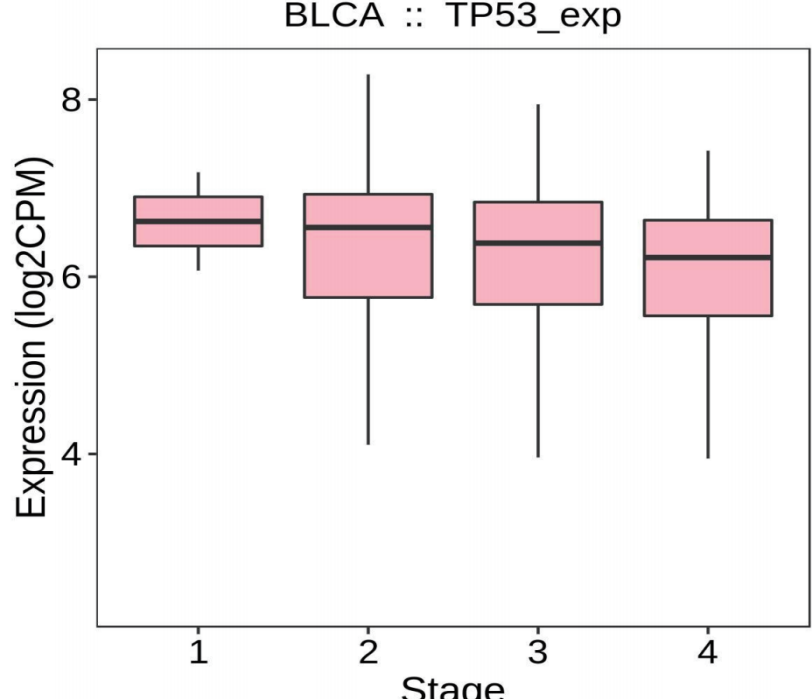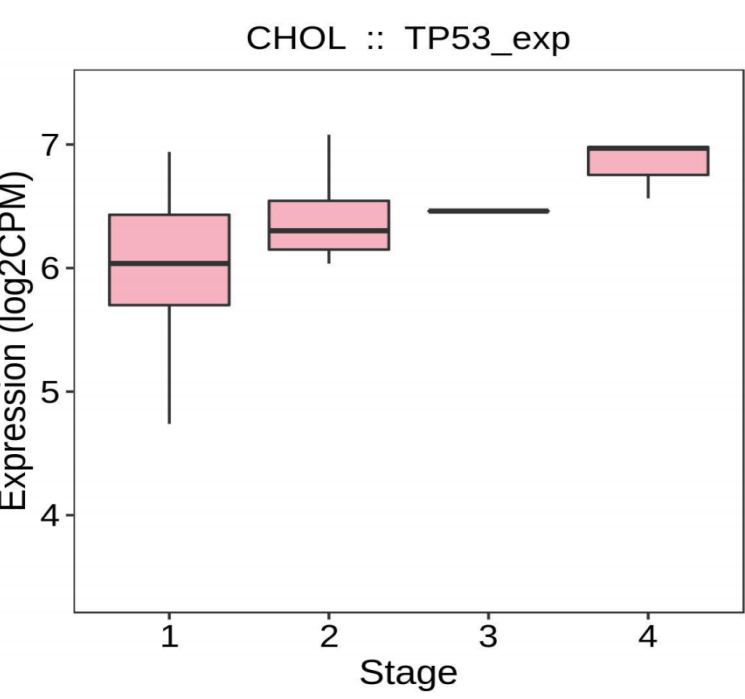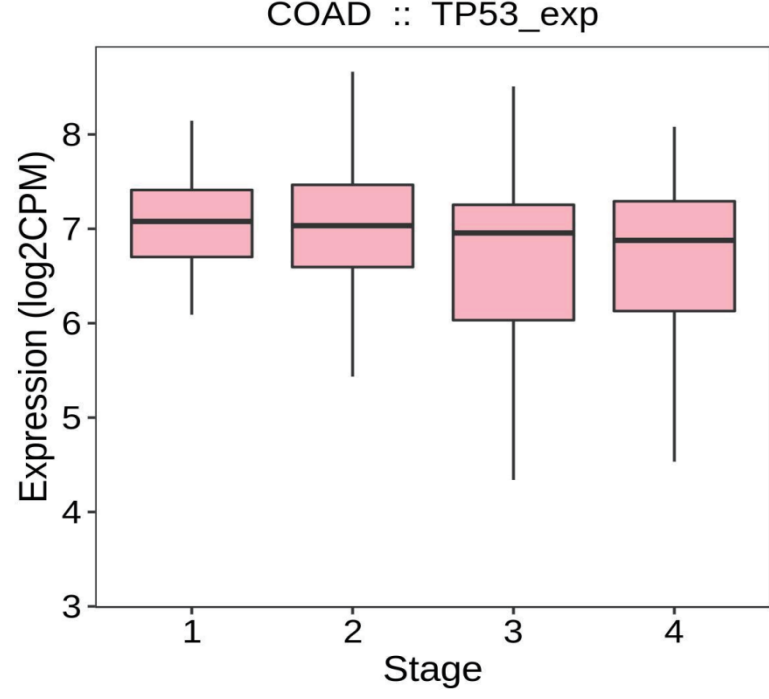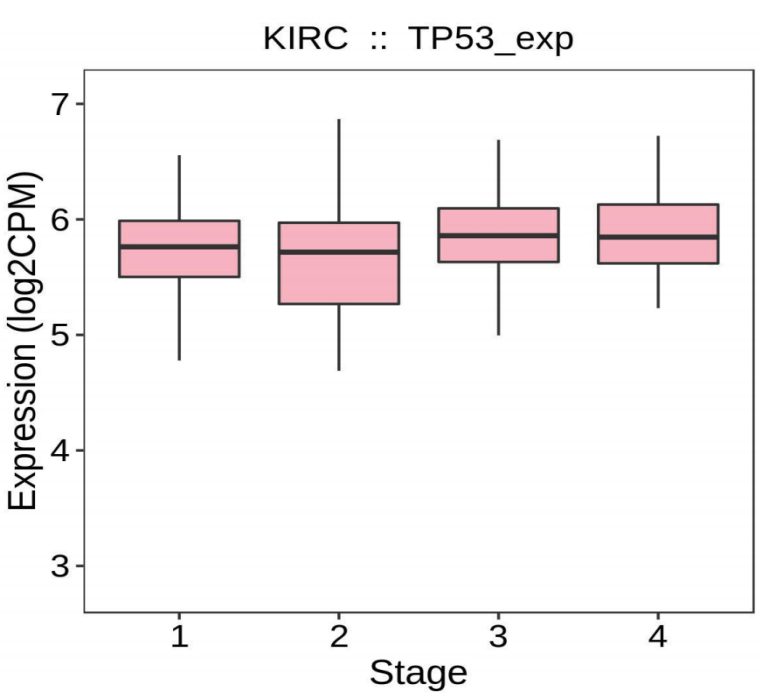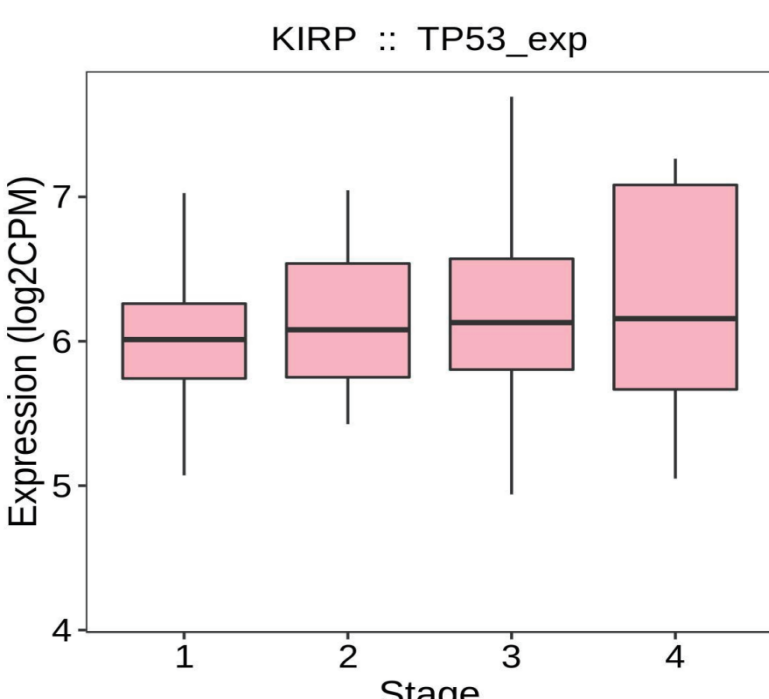

Supplement: Supplementary file 21 [file 1]
